# Supplementary material for: In Vitro Secretome Analysis Suggests Differential Pathogenic Mechanisms between Fusarium oxysporum f. sp. cubense Race 1 and Race 4
Source: MDPI journal article supplement (doi:10.3390/biom11091353), 2021-09-12
Supplement: s1 [file s1]

## Supplementary Tables

**Table S1.** Gene-specific primers sequences designed for qRT-PCR.

| Protein Name                                     | Gene Name<br>(Foc1/Foc4) | Forward Primer             | Reverse Primer               |
|--------------------------------------------------|--------------------------|----------------------------|------------------------------|
| Cutinase                                         | ENH74517.1/ EXL99094.1   | TGTTGTACGCTGTGATCTGCT      | CACTTCTTCTACTCGCTACTGCT<br>A |
| Glycosyl hydrolase family 17                     | ENH73451.1/ EXL90453.1   | TTGACGTGCTTCTGAACATTCC     | ATCACCAACGGCTTTCCCTA         |
| Endopolygalacturonase                            | ENH63545.1/EXL90516.1    | ATGTTGTATCCGCTGGAAGAA      | TGAGCAGAACTACTATGGTGGC       |
| Polygalacturonase                                | ENH75544.1/EXL99525.1    | CTGTGGAAGAACCGATGTCAA<br>A | GTGGGATGGAAACGGAGGAA         |
| Endo-1,3(4)-beta-glucanase                       | ENH65756.1/EXM05404.1    | TGGAGAATGTCAACGGGCAGA<br>A | CAAACCTGGACCCGCCAAACG        |
| Alpha 1,3-glucosidase                            | ENH68739.1/EXM07121.1    | TTGGCATTCTGAACATA          | AGCCGTAAAGCGTCATT            |
| Trypsin                                          | ENH63648.1/EXL97312.1    | GACGGTGTTGGCGTTGAGGA       | ACATCGTTGGCGGCACTTCT         |
| SIX1                                             | ENH66349.1/EXL90175.1    | TCCCAGACGAGTGATTTC         | AGTCGCCCCGACGGTTAG           |
| Cytochrome P450 55A1                             | ENH66511.1/EXL92621.1    | TCTAAGCCATCAGAACGA         | GGTCTTGGGCGACTTTT            |
| Peptidase A1 domain-containing protein           | ENH72305.1/EXL91252.1    | ATCCGCCAAGTAACCAG          | CAATGCCACCAAGAATAA           |
| Pyr_redox_2 domain-containing protein            | ENH63877.1/EXM07548.1    | AACCTGCCTATTTCCGCTACG      | GCTGTGATCTTGGTGGTCCTG        |
| N4-(Beta-N-acetylglucosaminy)-L-asparagi<br>nase | ENH67070.1/EXM02659.1    | TGGTCGTGGTCTTGCTGGTG       | GGGCTGCTTGTGGAAGTATCG        |
| $\beta$ -Tublin                                  | reference gene           | TCAGTGCGGTAACCAAATCGG      | GACGGCTCGGGGAACATACTTG       |

**Table S3.** The annotation of the secreted proteins used for qRT-PCR analysis.

| <b>Protein Name</b>                               | <b>Gene Name<br/>(Foc1/Foc4)</b> | <b>CAZymes<br/>Annotation</b> | <b>PHI Annotation</b>             |
|---------------------------------------------------|----------------------------------|-------------------------------|-----------------------------------|
| Cutinase                                          | ENH74517.1/ EXL99094.1           | CE3                           | PHI:407 loss_of_pathogenicity     |
| Glycosyl hydrolase family 17                      | ENH73451.1/ EXL90453.1           | GH17                          | PHI:2896 reduced_virulence        |
| Endopolygalacturonase                             | ENH63545.1/EXL90516.1            | GH28                          | PHI:2818 reduced_virulence        |
| Polygalacturonase                                 | ENH75544.1/EXL99525.1            | GH28                          | PHI:2817 unaffected_pathogenicity |
| Endo-1,3(4)-Treta-glucanase                       | ENH65756.1/EXM05404.1            | GH16                          | -                                 |
| Alpha 1,3-glucosidase                             | ENH68739.1/EXM07121.1            | GH31                          | PHI:6739 reduced_virulence        |
| Trypsin                                           | ENH63648.1/EXL97312.1            | -                             | PHI:652 effector                  |
| SIX1                                              | ENH66349.1/EXL90175.1            | -                             | PHI:379 SIX1 effector             |
| Cytochrome P450 55A1                              | ENH66511.1/EXL92621.1            | -                             | PHI:6739 reduced_virulence        |
| Peptidase A1 domain-containing protein            | ENH72305.1/EXL91252.1            | -                             | PHI:6815 unaffected_pathogenicity |
| Pyr_redox_2 domain-containing protein             | ENH63877.1/EXM07548.1            | -                             | -                                 |
| N4-(Treta-N-acetylglucosaminy)-L-asparagin<br>ase | ENH67070.1/EXM02659.1            | -                             | -                                 |
