# Supplementary material for: In Vitro Secretome Analysis Suggests Differential Pathogenic Mechanisms between Fusarium oxysporum f. sp. cubense Race 1 and Race 4
Source: Biomolecules. 2021 Sep 12;11(9):1353. doi: 10.3390/biom11091353 (PMC8466104; doi:10.3390/biom11091353)
Supplement: Supplementary file 1 [file biomolecules-11-01353-s001.zip › Supplementary Table S2.xlsx]

## Sheet: Foc1
#ID	Description	Foc1_unique	Scan_Prosite	Signalp_6	TMHMM_2.0	Phobius_1.01	Big-PI	PredGPI	TargetP_2.0	DeepLoc_1.0	WoLF-PSort_0.2	ProtComp_9	Localization	dbCAN_2	EffectorP_3.0	SSP	PHI_base	Effector_prediction	COG_category	GOs	KEGG_ko
EMT61258.1	-	Y	0	SP	0	0	FALSE	FALSE	SP	Extracellular	extr	Membrane bound Extracellular (Secreted)	Classical_secreted		Non-effector	0			-	-	-
ENH63877.1	Pyridine nucleotide-disulphide oxidoreductase	Y	0	SP	0	0	FALSE	FALSE	SP	Extracellular	extr	Membrane bound Extracellular (Secreted)	Classical_secreted		Non-effector	0	reduced_virulence		O	-	-
ENH67480.1	-	Y	0	SP	0	0	FALSE	FALSE	SP	Extracellular	extr	Membrane bound Extracellular (Secreted)	Classical_secreted		Non-effector	0			-	-	-
ENH67939.1	-	Y	0	SP	0	0	FALSE	FALSE	SP	Extracellular	extr	Extracellular (Secreted)	Classical_secreted		Non-effector	0			-	-	-
ENH67972.1	Secreted in xylem		0	SP	0	0	FALSE	FALSE	SP	Extracellular	extr	Membrane bound Extracellular (Secreted)	Classical_secreted		Apoplastic effector	0	effector_(plant_avirulence_determinant)	Y	S	-	-
ENH69297.1	-	Y	0	SP	0	0	FALSE	FALSE	SP	Extracellular	extr	Extracellular (Secreted)	Classical_secreted		Apoplastic effector	0		Y	-	-	-
ENH69833.1	WSC domain		0	SP	0	0	FALSE	TRUE	SP	Cell_membrane	extr	Membrane bound Extracellular (Secreted)	Classical_membrane		Non-effector	0	reduced_virulence		S	-	-
ENH70698.1	-	Y	0	SP	0	0	FALSE	FALSE	SP	Extracellular	extr	Membrane bound Extracellular (Secreted)	Classical_secreted		Non-effector	0			-	-	-
ENH72873.1	-	Y	0	SP	0	0	FALSE	FALSE	SP	Extracellular	extr	Extracellular (Secreted)	Classical_secreted		Apoplastic/cytoplasmic effector	1		Y	-	-	-
ENH74324.1	-	Y	0	SP	0	0	FALSE	TRUE	SP	Extracellular	extr	Extracellular (Secreted)	Classical_membrane		Non-effector	0			-	-	-
ENH75834.1	-	Y	0	SP	0	0	FALSE	FALSE	SP	Extracellular	extr	Membrane bound Extracellular (Secreted)	Classical_secreted		Non-effector	0			-	-	-
EXL89833.1	-		0	SP	0	0	FALSE	FALSE	SP	Extracellular	extr	Membrane bound Mitochondrial	Classical_secreted		Non-effector	0			-	-	-
EXL90175.1	-	Y	0	SP	0	0	FALSE	FALSE	SP	Extracellular	extr	Endoplasmic reticulum	Classical_secreted		Apoplastic effector	0	reduced_virulence	Y	-	-	-
EXL90314.1	Domain of unknown function (DUF1965)		0	SP	0	0	FALSE	FALSE	SP	Extracellular	extr	Membrane bound Extracellular (Secreted)	Classical_secreted		Non-effector	0	reduced_virulence		Q	-	ko:K00276
EXL90416.1	Prolyl oligopeptidase family	Y	0	SP	0	0	FALSE	FALSE	SP	Extracellular	extr	Membrane bound Extracellular (Secreted)	Classical_secreted		Non-effector	0			S	-	-
EXL90453.1	Belongs to the glycosyl hydrolase 17 family		0	SP	0	0	FALSE	FALSE	SP	Extracellular	extr	Membrane bound Mitochondrial	Classical_secreted	GH17	Non-effector	0	reduced_virulence		G	-	ko:K01199,ko:K01210
EXL90515.1	Bifunctional enzyme with both catalase and broad- spectrum peroxidase activity. Confers resistance to H(2)O(2) in hyphae. May play an antioxidative role in fungal defense against the host-produced H(2)O(2) (oxidative burst) at the early stage of plant infection		0	SP	0	0	FALSE	FALSE	SP	Extracellular	extr	Membrane bound Mitochondrial	Classical_secreted		Non-effector	0	unaffected_pathogenicity__reduced_virulence		Q	GO:0003674,GO:0003824,GO:0004096,GO:0004601,GO:0005575,GO:0005622,GO:0005623,GO:0008150,GO:0008152,GO:0009636,GO:0009987,GO:0016209,GO:0016491,GO:0016684,GO:0042221,GO:0044464,GO:0050896,GO:0051716,GO:0055114,GO:0070887,GO:0097237,GO:0098754,GO:0098869,GO:1990748	ko:K03782
EXL90545.1	Glycoside hydrolase family 71	Y	0	SP	0	0	FALSE	FALSE	SP	Extracellular	extr	Membrane bound Extracellular (Secreted)	Classical_secreted	GH71|CBM24|CBM24	Non-effector	0			G	-	-
EXL90585.1	Serine aminopeptidase, S33	Y	0	SP	0	0	FALSE	FALSE	SP	Extracellular	extr	Membrane bound Mitochondrial	Classical_secreted		Non-effector	0			I	-	-
EXL90709.1	Belongs to the peptidase S10 family		0	SP	0	0	FALSE	FALSE	SP	Extracellular	extr	Extracellular (Secreted)	Classical_secreted		Non-effector	0	reduced_virulence		O	-	ko:K01288
EXL91043.1	to polyamine oxidase		0	SP	0	0	FALSE	FALSE	SP	Extracellular	extr	Cytoplasmic	Classical_secreted		Non-effector	0	unaffected_pathogenicity		Q	-	ko:K13366
EXL91059.1	Belongs to the peptidase S10 family	Y	0	SP	0	0	FALSE	FALSE	SP	Extracellular	extr	Membrane bound Lysosomal	Classical_secreted		Non-effector	0	reduced_virulence		O	-	ko:K13289
EXL91080.1	FAD dependent oxidoreductase	Y	0	SP	0	0	FALSE	FALSE	SP	Extracellular	extr	Membrane bound Mitochondrial	Classical_secreted		Non-effector	0			E	-	-
EXL91092.1	-	Y	0	SP	0	0	FALSE	FALSE	SP	Extracellular	extr	Membrane bound Mitochondrial	Classical_secreted	AA11	Non-effector	0			-	-	-
EXL91194.1	GLEYA domain		0	SP	0	0	FALSE	FALSE	SP	Extracellular	extr	Membrane bound Extracellular (Secreted)	Classical_secreted		Non-effector	0			S	-	-
EXL91222.1	Amidohydrolase family	Y	0	SP	0	0	FALSE	FALSE	SP	Extracellular	extr	Membrane bound Mitochondrial	Classical_secreted		Non-effector	0			G	-	-
EXL91228.1	-	Y	0	SP	0	0	FALSE	FALSE	SP	Extracellular	extr	Membrane bound Extracellular (Secreted)	Classical_secreted		Non-effector	0			-	-	-
EXL91231.1	-	Y	0	SP	0	0	FALSE	TRUE	SP	Extracellular	extr	Lysosomal	Classical_membrane		Non-effector	0			-	-	-
EXL91356.1	Cytoplasmic phospholipase A2, catalytic subunit	Y	0	SP	0	0	FALSE	TRUE	SP	Extracellular	extr	Membrane bound Extracellular (Secreted)	Classical_membrane		Non-effector	0	unaffected_pathogenicity		G	GO:0000003,GO:0000322,GO:0000323,GO:0000324,GO:0000746,GO:0000747,GO:0003674,GO:0003824,GO:0004620,GO:0004622,GO:0005575,GO:0005576,GO:0005618,GO:0005622,GO:0005623,GO:0005737,GO:0005773,GO:0005783,GO:0005886,GO:0006575,GO:0006629,GO:0006644,GO:0006650,GO:0006658,GO:0006660,GO:0006793,GO:0006796,GO:0006807,GO:0006950,GO:0006970,GO:0008150,GO:0008152,GO:0009056,GO:0009277,GO:0009395,GO:0009405,GO:…	ko:K13333
EXL91373.1	-	Y	0	SP	0	0	FALSE	FALSE	SP	Extracellular	extr	Extracellular (Secreted)	Classical_secreted		Cytoplasmic/apoplastic effector	1		Y	-	-	-
EXL91444.1	Common central domain of tyrosinase		0	SP	0	0	FALSE	FALSE	SP	Extracellular	extr	Extracellular (Secreted)	Classical_secreted		Non-effector	0	unaffected_pathogenicity		S	-	ko:K00505
EXL91478.1	Peptidase inhibitor I9		0	SP	0	0	FALSE	FALSE	SP	Extracellular	extr	Membrane bound Mitochondrial	Classical_secreted		Non-effector	0	unaffected_pathogenicity		O	GO:0002252,GO:0002253,GO:0002376,GO:0002682,GO:0002684,GO:0003674,GO:0003824,GO:0004175,GO:0004252,GO:0005488,GO:0005575,GO:0005576,GO:0006508,GO:0006516,GO:0006807,GO:0006955,GO:0006956,GO:0006959,GO:0008150,GO:0008152,GO:0008233,GO:0008236,GO:0009056,GO:0009057,GO:0009100,GO:0009405,GO:0009605,GO:0009607,GO:0009987,GO:0016787,GO:0017171,GO:0019538,GO:0019863,GO:0019865,GO:0020012,GO:0030163,GO:…	ko:K18549
EXL91481.1	Necrosis inducing protein (NPP1)		0	SP	0	0	FALSE	FALSE	SP	Extracellular	extr	Membrane bound Extracellular (Secreted)	Classical_secreted		Non-effector	0	unaffected_pathogenicity		S	-	-
EXL91484.1	Glycosyl hydrolase family 57	Y	0	SP	0	0	FALSE	FALSE	SP	Extracellular	extr	Membrane bound Lysosomal	Classical_secreted	CE4	Non-effector	0	unaffected_pathogenicity		O	-	ko:K22278
EXL91520.1	Belongs to the peptidase M28 family		0	SP	0	0	FALSE	FALSE	SP	Extracellular	extr	Membrane bound Extracellular (Secreted)	Classical_secreted		Non-effector	0	reduced_virulence		O	GO:0000322,GO:0000323,GO:0000324,GO:0005575,GO:0005622,GO:0005623,GO:0005737,GO:0005773,GO:0043226,GO:0043227,GO:0043229,GO:0043231,GO:0044424,GO:0044444,GO:0044464	ko:K05994
EXL91524.1	Common central domain of tyrosinase		0	SP	0	0	FALSE	FALSE	SP	Extracellular	extr	Membrane bound Extracellular (Secreted)	Classical_secreted		Non-effector	0	unaffected_pathogenicity		S	-	ko:K00505
EXL91591.1	Belongs to the glycosyl hydrolase 32 family	Y	0	SP	0	0	FALSE	TRUE	SP	Extracellular	extr	Membrane bound Extracellular (Secreted)	Classical_membrane	CBM38|GH32	Non-effector	0	reduced_virulence		G	-	ko:K01193
EXL91678.1	-	Y	0	SP	0	0	FALSE	TRUE	SP	Cell_membrane	extr	Extracellular (Secreted)	Classical_membrane		Cytoplasmic effector	0			-	-	-
EXL91780.1	-	Y	0	SP	0	0	FALSE	TRUE	SP	Cell_membrane	extr	Extracellular (Secreted)	Classical_membrane		Non-effector	0			-	-	-
EXL91801.1	amine oxidase		0	SP	0	0	FALSE	FALSE	SP	Extracellular	extr	Membrane bound Extracellular (Secreted)	Classical_secreted		Non-effector	0			S	-	-
EXL91933.1	Ferritin-like domain		0	SP	0	0	FALSE	FALSE	SP	Extracellular	extr	Membrane bound Extracellular (Secreted)	Classical_secreted		Non-effector	0			S	-	-
EXL91943.1	Isochorismatase family	Y	0	SP	0	0	FALSE	FALSE	SP	Extracellular	extr	Membrane bound Mitochondrial	Classical_secreted		Non-effector	0			Q	-	-
EXL91946.1	-	Y	0	SP	0	0	FALSE	FALSE	SP	Extracellular	extr	Membrane bound Extracellular (Secreted)	Classical_secreted		Non-effector	0			-	-	-
EXL92105.1	Aldo/keto reductase family	Y	0	NO_SP	0	0	FALSE	FALSE	SP	Endoplasmic_reticulum	extr	Endoplasmic reticulum	Non-classical_secreted		Non-effector	0	unaffected_pathogenicity		S	-	ko:K00002
EXL92137.1	-	Y	0	SP	0	0	FALSE	FALSE	SP	Extracellular	extr	Membrane bound Extracellular (Secreted)	Classical_secreted		Cytoplasmic effector	0		Y	-	-	-
EXL92184.1	-		0	SP	0	0	FALSE	FALSE	SP	Extracellular	extr	Extracellular (Secreted)	Classical_secreted		Apoplastic effector	0		Y	-	-	-
EXL92213.1	Peroxidase, family 2		0	SP	0	0	FALSE	TRUE	SP	Extracellular	extr	Membrane bound Extracellular (Secreted)	Classical_membrane		Non-effector	0	reduced_virulence		O	-	-
EXL92217.1	Belongs to the peptidase A1 family	Y	0	SP	0	0	FALSE	FALSE	SP	Extracellular	extr	Cytoplasmic	Classical_secreted		Non-effector	0	reduced_virulence		O	-	-
EXL92242.1	Chorismate mutase type II		0	SP	0	0	FALSE	FALSE	SP	Extracellular	extr	Extracellular (Secreted)	Classical_secreted		Apoplastic/cytoplasmic effector	0		Y	S	-	-
EXL92277.1	-		0	SP	0	0	FALSE	FALSE	SP	Extracellular	extr	Extracellular (Secreted)	Classical_secreted		Apoplastic effector	0		Y	-	-	-
EXL92289.1	-		0	SP	0	0	FALSE	FALSE	SP	Extracellular	extr	Extracellular (Secreted)	Classical_secreted		Cytoplasmic/apoplastic effector	0		Y	-	-	-
EXL92294.1	galactose oxidase		0	SP	0	0	FALSE	TRUE	SP	Extracellular	extr	Membrane bound Extracellular (Secreted)	Classical_membrane	AA5_2	Non-effector	0			O	-	ko:K04618
EXL92306.1	Belongs to the oxygen-dependent FAD-linked oxidoreductase family		0	SP	0	0	FALSE	FALSE	SP	Extracellular	extr	Membrane bound Extracellular (Secreted)	Classical_secreted		Non-effector	0	unaffected_pathogenicity		C	-	-
EXL92338.1	to beta-fructofuranosidase		0	SP	0	0	FALSE	FALSE	SP	Extracellular	extr	Extracellular (Secreted)	Classical_secreted	GH32	Non-effector	0	reduced_virulence		G	GO:0000272,GO:0000322,GO:0000323,GO:0000324,GO:0003674,GO:0003824,GO:0004553,GO:0004564,GO:0004575,GO:0005575,GO:0005576,GO:0005622,GO:0005623,GO:0005737,GO:0005739,GO:0005773,GO:0005975,GO:0005976,GO:0005984,GO:0005985,GO:0005987,GO:0008150,GO:0008152,GO:0009056,GO:0009057,GO:0009311,GO:0009313,GO:0009987,GO:0010145,GO:0010147,GO:0015926,GO:0016052,GO:0016787,GO:0016798,GO:0033530,GO:0034484,GO:…	ko:K01193
EXL92369.1	Belongs to the multicopper oxidase family		0	SP	0	0	FALSE	FALSE	SP	Extracellular	extr	Membrane bound Lysosomal	Classical_secreted	AA1	Non-effector	0	reduced_virulence		Q	-	ko:K00423
EXL92473.1	Belongs to the glycosyl hydrolase 17 family		0	SP	0	0	FALSE	FALSE	SP	Extracellular	extr	Membrane bound Golgi	Classical_secreted	GH17	Apoplastic effector	0	reduced_virulence	Y	G	GO:0000003,GO:0000322,GO:0000323,GO:0000324,GO:0000746,GO:0000747,GO:0003674,GO:0003676,GO:0003723,GO:0003729,GO:0003824,GO:0004553,GO:0005488,GO:0005575,GO:0005576,GO:0005618,GO:0005622,GO:0005623,GO:0005737,GO:0005773,GO:0005783,GO:0006950,GO:0007154,GO:0007155,GO:0008150,GO:0009267,GO:0009268,GO:0009277,GO:0009405,GO:0009605,GO:0009607,GO:0009628,GO:0009986,GO:0009987,GO:0009991,GO:0012505,GO:…	ko:K01210
EXL92539.1	Glyoxalase/Bleomycin resistance protein/Dioxygenase superfamily	Y	0	SP	0	0	FALSE	FALSE	SP	Lysosome/Vacuole	extr	Cytoplasmic	Classical_secreted		Non-effector	0			O	-	ko:K01759
EXL92591.1	Necrosis inducing protein (NPP1)		0	SP	0	0	FALSE	FALSE	SP	Extracellular	extr	Extracellular (Secreted)	Classical_secreted		Apoplastic effector	0	reduced_virulence__unaffected_pathogenicity	Y	S	-	-
EXL92596.1	Belongs to the RNase T2 family		0	SP	0	0	FALSE	FALSE	SP	Extracellular	extr	Extracellular (Secreted)	Classical_secreted		Cytoplasmic effector	0	reduced_virulence	Y	A	GO:0005575,GO:0005622,GO:0005623,GO:0005737,GO:0005773,GO:0005775,GO:0031974,GO:0043226,GO:0043227,GO:0043229,GO:0043231,GO:0043233,GO:0044422,GO:0044424,GO:0044437,GO:0044444,GO:0044446,GO:0044464,GO:0070013	ko:K01166
EXL92607.1	-		0	SP	0	0	FALSE	FALSE	SP	Extracellular	extr	Plasma membrane	Classical_secreted		Non-effector	0			-	-	-
EXL92609.1	histidine acid phosphatase		0	SP	0	0	FALSE	FALSE	SP	Extracellular	extr	Membrane bound Extracellular (Secreted)	Classical_secreted		Non-effector	0	unaffected_pathogenicity		S	-	ko:K01078
EXL92686.1	to hydrolase		0	SP	0	0	FALSE	FALSE	SP	Extracellular	extr	Extracellular (Secreted)	Classical_secreted	GH2	Non-effector	0	reduced_virulence__unaffected_pathogenicity		G	-	-
EXL92709.1	SCP / Tpx-1 / Ag5 / PR-1 / Sc7 family of extracellular domains.		0	SP	0	0	FALSE	FALSE	SP	Extracellular	extr	Extracellular (Secreted)	Classical_secreted		Non-effector	0	reduced_virulence		S	-	ko:K13449
EXL92713.1	to FAD-dependent oxygenase		0	SP	0	0	FALSE	FALSE	SP	Extracellular	extr	Membrane bound Extracellular (Secreted)	Classical_secreted		Non-effector	0	reduced_virulence		C	-	-
EXL92716.1	Belongs to the oxygen-dependent FAD-linked oxidoreductase family	Y	0	SP	0	0	FALSE	FALSE	SP	Extracellular	extr	Membrane bound Extracellular (Secreted)	Classical_secreted		Non-effector	0	unaffected_pathogenicity		C	-	-
EXL92735.1	Belongs to the GMC oxidoreductase family		0	SP	0	0	FALSE	FALSE	SP	Extracellular	extr	Cytoplasmic	Classical_secreted	AA3_2	Non-effector	0	reduced_virulence		E	-	-
EXL92753.1	Glycosyl hydrolases family 16		0	SP	0	0	FALSE	FALSE	SP	Extracellular	extr	Extracellular (Secreted)	Classical_secreted	GH16_1	Apoplastic/cytoplasmic effector	0	reduced_virulence	Y	S	-	-
EXL92813.1	-	Y	0	SP	0	0	FALSE	FALSE	SP	Extracellular	extr	Membrane bound Extracellular (Secreted)	Classical_secreted		Non-effector	0			-	-	-
EXL92865.1	Glycosyl hydrolases family 16		0	SP	0	0	FALSE	FALSE	SP	Extracellular	extr	Extracellular (Secreted)	Classical_secreted	GH16_23	Non-effector	0			O	-	-
EXL92913.1	Strictosidine synthase		0	SP	0	0	FALSE	FALSE	SP	Extracellular	extr	Extracellular (Secreted)	Classical_secreted		Non-effector	0	reduced_virulence		G	-	ko:K01053
EXL92932.1	Alpha-amylase domain		0	SP	0	0	FALSE	FALSE	SP	Extracellular	extr	Membrane bound Extracellular (Secreted)	Classical_secreted	GH13_1	Non-effector	0	reduced_virulence		G	-	ko:K01176
EXL92963.1	Bifunctional enzyme with both catalase and broad- spectrum peroxidase activity. Confers resistance to H(2)O(2) in hyphae. May play an antioxidative role in fungal defense against the host-produced H(2)O(2) (oxidative burst) at the early stage of plant infection		0	SP	0	0	FALSE	FALSE	SP	Extracellular	extr	Membrane bound Mitochondrial	Classical_secreted		Non-effector	0	unaffected_pathogenicity__reduced_virulence		Q	GO:0003674,GO:0003824,GO:0004096,GO:0004601,GO:0005575,GO:0005622,GO:0005623,GO:0008150,GO:0008152,GO:0009636,GO:0009987,GO:0016209,GO:0016491,GO:0016684,GO:0042221,GO:0044464,GO:0050896,GO:0051716,GO:0055114,GO:0070887,GO:0097237,GO:0098754,GO:0098869,GO:1990748	ko:K03782
EXL92982.1	Fibronectin type III-like domain		0	SP	0	0	FALSE	FALSE	SP	Extracellular	extr	Cytoplasmic	Classical_secreted	GH3	Non-effector	0	unaffected_pathogenicity		G	-	ko:K05349
EXL93001.1	Kelch		0	SP	0	0	FALSE	FALSE	SP	Extracellular	extr	Membrane bound Extracellular (Secreted)	Classical_secreted		Non-effector	0	reduced_virulence		S	-	-
EXL93009.1	Gamma-glutamyltranspeptidase	Y	0	SP	0	0	FALSE	FALSE	SP	Extracellular	extr	Cytoplasmic	Classical_secreted		Non-effector	0	reduced_virulence		E	-	ko:K00681
EXL93019.1	Peptidase family C69		0	SP	0	0	FALSE	FALSE	SP	Extracellular	extr	Membrane bound Lysosomal	Classical_secreted		Non-effector	0			E	-	-
EXL93107.1	-	Y	0	SP	0	0	FALSE	FALSE	SP	Extracellular	extr	Extracellular (Secreted)	Classical_secreted		Cytoplasmic effector	0		Y	-	-	-
EXL93145.1	Phage lysozyme	Y	0	SP	0	0	FALSE	FALSE	SP	Extracellular	extr	Membrane bound Extracellular (Secreted)	Classical_secreted	GH24	Apoplastic/cytoplasmic effector	0		Y	G	-	ko:K01185
EXL93265.1	PBP superfamily domain		0	SP	0	0	FALSE	FALSE	SP	Extracellular	extr	Membrane bound Peroxisomal	Classical_secreted		Non-effector	0			H	-	-
EXL93282.1	alkaline foam protein B precursor	Y	0	SP	0	0	FALSE	FALSE	SP	Extracellular	extr	Extracellular (Secreted)	Classical_secreted		Apoplastic/cytoplasmic effector	0	effector_(plant_avirulence_determinant)	Y	S	-	-
EXL93335.1	Glycosyl hydrolase family 61	Y	0	SP	0	0	FALSE	FALSE	SP	Extracellular	extr	Membrane bound Extracellular (Secreted)	Classical_secreted	AA9	Non-effector	0	unaffected_pathogenicity		O	-	-
EXL93524.1	CFEM domain	Y	0	SP	0	1	FALSE	TRUE	SP	Cell_membrane	extr	Membrane bound Extracellular (Secreted)	Classical_membrane		Non-effector	0			S	GO:0003674,GO:0005488,GO:0005575,GO:0005576,GO:0005618,GO:0005623,GO:0005886,GO:0006810,GO:0006873,GO:0006875,GO:0006879,GO:0006897,GO:0006898,GO:0007155,GO:0008104,GO:0008150,GO:0009277,GO:0009405,GO:0009986,GO:0009987,GO:0015031,GO:0015833,GO:0015886,GO:0016020,GO:0016192,GO:0017038,GO:0019725,GO:0020028,GO:0020037,GO:0022610,GO:0030003,GO:0030312,GO:0030445,GO:0031589,GO:0033036,GO:0033212,GO:…	ko:K22494
EXL93586.1	Belongs to the glycosyl hydrolase 43 family	Y	0	SP	0	0	FALSE	FALSE	SP	Extracellular	extr	Membrane bound Extracellular (Secreted)	Classical_secreted	GH43_36	Non-effector	0	increased_virulence_(hypervirulence)		G	-	-
EXL93591.1	-		0	SP	0	0	FALSE	FALSE	SP	Extracellular	extr	Membrane bound Extracellular (Secreted)	Classical_secreted		Apoplastic effector	0		Y	-	-	-
EXL93656.1	Belongs to the type-B carboxylesterase lipase family		0	SP	0	0	FALSE	FALSE	SP	Extracellular	extr	Membrane bound Lysosomal	Classical_secreted		Non-effector	0	reduced_virulence		G	-	-
EXL93661.1	Tuberculosis necrotizing toxin		0	SP	0	0	FALSE	FALSE	SP	Extracellular	extr	Membrane bound Extracellular (Secreted)	Classical_secreted		Apoplastic effector	0		Y	S	-	-
EXL93714.1	Hydrolyzes a variety of simple alpha-D-galactoside as well as more complex molecules such as oligosaccharides and polysaccharides	Y	0	SP	0	0	FALSE	FALSE	SP	Extracellular	extr	Membrane bound Extracellular (Secreted)	Classical_secreted	GH36	Non-effector	0			G	-	ko:K07407
EXL93718.1	Belongs to the peptidase S10 family		0	SP	0	0	FALSE	FALSE	SP	Extracellular	extr	Membrane bound Extracellular (Secreted)	Classical_secreted		Non-effector	0	reduced_virulence		O	-	ko:K01288
EXL93736.1	-		0	SP	0	0	FALSE	FALSE	SP	Extracellular	extr	Extracellular (Secreted)	Classical_secreted		Cytoplasmic effector	0		Y	-	-	-
EXL93798.1	Meiotically up-regulated gene family	Y	0	SP	0	0	FALSE	FALSE	SP	Extracellular	extr	Membrane bound Extracellular (Secreted)	Classical_secreted		Non-effector	0			S	-	-
EXL93953.1	Cutinase	Y	0	SP	0	0	FALSE	FALSE	SP	Extracellular	extr	Extracellular (Secreted)	Classical_secreted	CE5	Non-effector	0	unaffected_pathogenicity		S	-	-
EXL93975.1	-		0	SP	0	1	FALSE	TRUE	SP	Cell_membrane	extr	Lysosomal	Classical_membrane		Apoplastic effector	0			-	-	-
EXL94010.1	Belongs to the peptidase S8 family		0	SP	0	0	FALSE	FALSE	SP	Extracellular	extr	Membrane bound Extracellular (Secreted)	Classical_secreted		Apoplastic effector	0	unaffected_pathogenicity	Y	O	GO:0002252,GO:0002253,GO:0002376,GO:0002682,GO:0002684,GO:0003674,GO:0003824,GO:0004175,GO:0004252,GO:0005488,GO:0005575,GO:0005576,GO:0006508,GO:0006516,GO:0006807,GO:0006955,GO:0006956,GO:0006959,GO:0008150,GO:0008152,GO:0008233,GO:0008236,GO:0009056,GO:0009057,GO:0009100,GO:0009405,GO:0009605,GO:0009607,GO:0009987,GO:0016787,GO:0017171,GO:0019538,GO:0019863,GO:0019865,GO:0020012,GO:0030163,GO:…	ko:K18549
EXL94236.1	Dienelactone hydrolase family		0	SP	0	0	FALSE	FALSE	SP	Extracellular	extr	Endoplasmic reticulum	Classical_secreted		Non-effector	0			Q	-	-
EXL94333.1	Mannan endo-1,6-alpha-mannosidase		0	SP	0	2	FALSE	TRUE	SP	Cell_membrane	extr	Membrane bound Extracellular (Secreted)	Classical_membrane	GH76	Non-effector	0			G	-	ko:K08257
EXL94350.1	to laccase	Y	0	SP	0	0	FALSE	FALSE	SP	Extracellular	extr	Extracellular (Secreted)	Classical_secreted	AA1_3	Non-effector	0	unaffected_pathogenicity		Q	-	-
EXL94494.1	Alpha galactosidase A	Y	0	SP	0	0	FALSE	FALSE	SP	Extracellular	extr	Membrane bound Extracellular (Secreted)	Classical_secreted	GH27	Non-effector	0			G	-	ko:K07407
EXL94563.1	Glycosyl hydrolases family 16	Y	0	SP	0	0	FALSE	TRUE	SP	Cell_membrane	extr	Membrane bound Extracellular (Secreted)	Classical_membrane	GH16_18	Non-effector	0			G	GO:0000131,GO:0003674,GO:0003824,GO:0005488,GO:0005575,GO:0005576,GO:0005618,GO:0005622,GO:0005623,GO:0005886,GO:0005975,GO:0005976,GO:0006022,GO:0006030,GO:0006037,GO:0006040,GO:0006807,GO:0008150,GO:0008152,GO:0009277,GO:0009986,GO:0009987,GO:0010383,GO:0016020,GO:0016043,GO:0016740,GO:0016757,GO:0017144,GO:0019863,GO:0019865,GO:0030312,GO:0030445,GO:0030446,GO:0031224,GO:0031225,GO:0031226,GO:…	ko:K01216
EXL94580.1	Cupin	Y	0	SP	0	0	FALSE	FALSE	SP	Extracellular	extr	Cytoplasmic	Classical_secreted		Apoplastic effector	0		Y	S	-	-
EXL94664.1	Belongs to the glycosyl hydrolase 11 (cellulase G) family	Y	0	SP	0	0	FALSE	FALSE	SP	Extracellular	extr	Extracellular (Secreted)	Classical_secreted	GH11	Apoplastic effector	0	unaffected_pathogenicity	Y	G	-	ko:K01181
EXL94691.1	Cytoplasmic phospholipase A2, catalytic subunit	Y	0	SP	0	0	FALSE	TRUE	SP	Cell_membrane	extr	Membrane bound Extracellular (Secreted)	Classical_membrane		Non-effector	0	unaffected_pathogenicity		I	-	ko:K13333
EXL94956.1	to cell wall glucanosyltransferase		0	SP	0	0	FALSE	FALSE	SP	Extracellular	extr	Membrane bound Lysosomal	Classical_secreted	GH16_18	Apoplastic effector	0		Y	O	GO:0000131,GO:0003674,GO:0003824,GO:0005575,GO:0005576,GO:0005618,GO:0005622,GO:0005623,GO:0005886,GO:0005975,GO:0005976,GO:0006022,GO:0006030,GO:0006037,GO:0006040,GO:0006807,GO:0008150,GO:0008152,GO:0009277,GO:0009986,GO:0009987,GO:0010383,GO:0016020,GO:0016043,GO:0016740,GO:0016757,GO:0017144,GO:0030312,GO:0030445,GO:0030446,GO:0031224,GO:0031225,GO:0031226,GO:0031505,GO:0043170,GO:0044036,GO:…	ko:K01216
EXL95029.1	Domain of unknown function (DUF1996)		0	SP	0	0	FALSE	FALSE	SP	Extracellular	extr	Extracellular (Secreted)	Classical_secreted		Non-effector	0	reduced_virulence		GO	-	-
EXL95032.1	Glycosyl hydrolases family 28	Y	0	SP	0	0	FALSE	FALSE	SP	Extracellular	extr	Extracellular (Secreted)	Classical_secreted	GH28	Non-effector	0	unaffected_pathogenicity		G	-	ko:K01213
EXL95188.1	Belongs to the peptidase S10 family		0	SP	0	0	FALSE	FALSE	SP	Extracellular	extr	Membrane bound Extracellular (Secreted)	Classical_secreted		Non-effector	0	reduced_virulence		O	GO:0000322,GO:0000323,GO:0000324,GO:0000328,GO:0003674,GO:0003824,GO:0004180,GO:0004185,GO:0005575,GO:0005576,GO:0005622,GO:0005623,GO:0005737,GO:0005773,GO:0005775,GO:0005783,GO:0006508,GO:0006518,GO:0006807,GO:0007039,GO:0008150,GO:0008152,GO:0008233,GO:0008236,GO:0008238,GO:0009056,GO:0009057,GO:0009058,GO:0009987,GO:0012505,GO:0016787,GO:0017171,GO:0019538,GO:0019748,GO:0030163,GO:0031974,GO:…	ko:K13289
EXL95206.1	Glycosyl hydrolases family 16		0	SP	0	0	FALSE	FALSE	SP	Extracellular	extr	Membrane bound Extracellular (Secreted)	Classical_secreted	GH16_1	Apoplastic/cytoplasmic effector	0	reduced_virulence	Y	O	-	-
EXL95490.1	-		0	SP	0	0	FALSE	FALSE	SP	Extracellular	extr	Extracellular (Secreted)	Classical_secreted	GH131	Non-effector	0			-	-	-
EXL95594.1	Belongs to the peptidase A1 family		0	SP	0	0	FALSE	TRUE	SP	Extracellular	extr	Plasma membrane	Classical_membrane		Non-effector	0	reduced_virulence__unaffected_pathogenicity		O	-	-
EXL95715.1	Glycosyl hydrolase family 61		0	SP	0	0	FALSE	FALSE	SP	Extracellular	extr	Extracellular (Secreted)	Classical_secreted	AA9	Non-effector	0	unaffected_pathogenicity		G	-	ko:K19356
EXL95898.1	Amb_all	Y	0	SP	0	0	FALSE	FALSE	SP	Extracellular	extr	Membrane bound Extracellular (Secreted)	Classical_secreted	PL1_4	Non-effector	0	increased_virulence_(hypervirulence)__reduced_virulence		G	-	ko:K01732
EXL95905.1	FAD dependent oxidoreductase	Y	0	SP	0	0	FALSE	FALSE	SP	Extracellular	extr	Membrane bound Mitochondrial	Classical_secreted		Non-effector	0			S	-	-
EXL95918.1	Zn_pept		0	SP	0	0	FALSE	FALSE	SP	Extracellular	extr	Extracellular (Secreted)	Classical_secreted		Non-effector	0			O	-	-
EXL96030.1	GDSL-like Lipase/Acylhydrolase family	Y	0	SP	0	0	FALSE	FALSE	SP	Extracellular	extr	Membrane bound Mitochondrial	Classical_secreted	CE16	Non-effector	0	unaffected_pathogenicity		O	-	-
EXL96074.1	Carboxylesterase family		0	SP	0	0	FALSE	FALSE	SP	Extracellular	extr	Membrane bound Lysosomal	Classical_secreted		Non-effector	0	reduced_virulence		T	-	-
EXL96081.1	-	Y	0	SP	0	0	FALSE	FALSE	SP	Extracellular	extr	Extracellular (Secreted)	Classical_secreted		Cytoplasmic effector	0		Y	-	-	-
EXL96100.1	Lactonase, 7-bladed beta-propeller	Y	0	SP	0	0	FALSE	FALSE	SP	Extracellular	extr	Extracellular (Secreted)	Classical_secreted		Non-effector	0	reduced_virulence		G	-	-
EXL96145.1	Carbohydrate binding domain		0	SP	0	0	FALSE	FALSE	SP	Extracellular	extr	Membrane bound Extracellular (Secreted)	Classical_secreted		Non-effector	0			V	-	-
EXL96190.1	1,4-alpha-D-glucan glucohydrolase		0	SP	0	0	FALSE	FALSE	SP	Extracellular	extr	Membrane bound Mitochondrial	Classical_secreted	GH15|CBM20	Non-effector	0	unaffected_pathogenicity__loss_of_pathogenicity		G	GO:0000272,GO:0000322,GO:0000323,GO:0000324,GO:0003674,GO:0003824,GO:0004339,GO:0004553,GO:0005575,GO:0005622,GO:0005623,GO:0005737,GO:0005773,GO:0005783,GO:0005975,GO:0005976,GO:0005977,GO:0005980,GO:0006073,GO:0006091,GO:0006112,GO:0008150,GO:0008152,GO:0009056,GO:0009057,GO:0009251,GO:0009986,GO:0009987,GO:0012505,GO:0015926,GO:0015980,GO:0016052,GO:0016787,GO:0016798,GO:0043170,GO:0043226,GO:…	ko:K01178
EXL96384.1	-	Y	0	SP	0	0	FALSE	FALSE	SP	Extracellular	extr	Extracellular (Secreted)	Classical_secreted		Cytoplasmic/apoplastic effector	0		Y	-	-	-
EXL96451.1	Belongs to the peptidase S10 family		0	SP	0	0	FALSE	FALSE	SP	Extracellular	extr	Membrane bound Lysosomal	Classical_secreted		Non-effector	0	reduced_virulence		O	-	ko:K01288
EXL96560.1	Calcineurin-like phosphoesterase		0	SP	0	0	FALSE	FALSE	SP	Extracellular	extr	Cytoplasmic	Classical_secreted		Non-effector	0			F	GO:0000322,GO:0000323,GO:0000324,GO:0005575,GO:0005622,GO:0005623,GO:0005737,GO:0005773,GO:0005829,GO:0043226,GO:0043227,GO:0043229,GO:0043231,GO:0044424,GO:0044444,GO:0044464	-
EXL96572.1	galactose oxidase	Y	0	SP	0	0	FALSE	FALSE	SP	Extracellular	extr	Membrane bound Extracellular (Secreted)	Classical_secreted	AA5_2	Non-effector	0	reduced_virulence		S	-	ko:K04618
EXL96690.1	Glycosyl hydrolases family 16		0	SP	0	0	FALSE	FALSE	SP	Extracellular	extr	Membrane bound Extracellular (Secreted)	Classical_secreted	GH16_22	Non-effector	0			G	-	-
EXL96812.1	Putative stress-responsive nuclear envelope protein		1	SP	0	0	FALSE	FALSE	SP	Mitochondrion	extr	Membrane bound Mitochondrial			Non-effector	0			S	GO:0000003,GO:0000280,GO:0005575,GO:0005622,GO:0005623,GO:0005634,GO:0005635,GO:0005737,GO:0005739,GO:0005783,GO:0005886,GO:0006139,GO:0006259,GO:0006310,GO:0006725,GO:0006807,GO:0006996,GO:0007049,GO:0007127,GO:0007131,GO:0008150,GO:0008152,GO:0009987,GO:0012505,GO:0016020,GO:0016043,GO:0022402,GO:0022414,GO:0031967,GO:0031975,GO:0034641,GO:0035825,GO:0043170,GO:0043226,GO:0043227,GO:0043229,GO:…	-
EXL96942.1	Lactonase, 7-bladed beta-propeller		0	SP	0	0	FALSE	FALSE	SP	Extracellular	extr	Extracellular (Secreted)	Classical_secreted		Non-effector	0	reduced_virulence		G	-	-
EXL97072.1	Belongs to the glycosyl hydrolase 43 family		0	SP	0	0	FALSE	FALSE	SP	Extracellular	extr	Membrane bound Mitochondrial	Classical_secreted	GH43_33	Non-effector	0			G	-	-
EXL97073.1	Belongs to the RNase T2 family	Y	0	SP	0	0	FALSE	FALSE	SP	Extracellular	extr	Extracellular (Secreted)	Classical_secreted		Non-effector	0	reduced_virulence		A	GO:0005575,GO:0005622,GO:0005623,GO:0005737,GO:0005773,GO:0005775,GO:0031974,GO:0043226,GO:0043227,GO:0043229,GO:0043231,GO:0043233,GO:0044422,GO:0044424,GO:0044437,GO:0044444,GO:0044446,GO:0044464,GO:0070013	ko:K01166
EXL97125.1	Pro-kumamolisin, activation domain		0	SP	0	0	FALSE	FALSE	SP	Extracellular	extr	Membrane bound Extracellular (Secreted)	Classical_secreted		Non-effector	0	unaffected_pathogenicity		O	-	ko:K01279
EXL97250.1	Belongs to the GMC oxidoreductase family	Y	0	SP	0	0	FALSE	FALSE	SP	Extracellular	extr	Cytoplasmic	Classical_secreted	AA3_2	Non-effector	0	reduced_virulence		E	-	ko:K00108
EXL97312.1	Belongs to the peptidase S1 family	Y	0	SP	0	0	FALSE	FALSE	SP	Extracellular	extr	Membrane bound Extracellular (Secreted)	Classical_secreted		Apoplastic effector	0	effector_(plant_avirulence_determinant)	Y	O	-	ko:K01312
EXL97319.1	FAD binding domain		0	SP	0	0	FALSE	FALSE	SP	Extracellular	extr	Membrane bound Mitochondrial	Classical_secreted		Non-effector	0	reduced_virulence		C	-	-
EXL97331.1	Belongs to the oxygen-dependent FAD-linked oxidoreductase family	Y	0	SP	0	0	FALSE	FALSE	SP	Extracellular	extr	Cytoplasmic	Classical_secreted		Non-effector	0	unaffected_pathogenicity		C	-	-
EXL97335.1	Guanyl-specific ribonuclease F1 precursor	Y	0	SP	0	0	FALSE	FALSE	SP	Extracellular	extr	Extracellular (Secreted)	Classical_secreted		Apoplastic effector	0		Y	S	GO:0001411,GO:0005575,GO:0005576,GO:0005623,GO:0030427,GO:0030428,GO:0044464,GO:0051286	ko:K01167
EXL97339.1	Belongs to the glycosyl hydrolase 5 (cellulase A) family	Y	0	SP	0	0	FALSE	TRUE	SP	Lysosome/Vacuole	extr	Membrane bound Extracellular (Secreted)	Classical_membrane	GH5_16	Non-effector	0			G	-	-
EXL97368.1	-		0	SP	0	0	FALSE	FALSE	SP	Extracellular	extr	Membrane bound Extracellular (Secreted)	Classical_secreted		Apoplastic effector	0	unaffected_pathogenicity	Y	-	-	-
EXL97375.1	Protein SnodProt1 precursor	Y	0	SP	0	0	FALSE	FALSE	SP	Extracellular	extr	Extracellular (Secreted)	Classical_secreted		Apoplastic effector	0	reduced_virulence	Y	S	-	-
EXL97451.1	Carboxylesterase family		1	SP	0	0	FALSE	FALSE	SP	Extracellular	extr	Membrane bound Extracellular (Secreted)			Non-effector	0	unaffected_pathogenicity		T	-	ko:K01050
EXL97452.1	-	Y	0	SP	0	0	FALSE	TRUE	SP	Extracellular	extr	Extracellular (Secreted)	Classical_membrane		Apoplastic effector	0			-	-	-
EXL97460.1	-		0	SP	0	0	FALSE	FALSE	SP	Extracellular	extr	Membrane bound Extracellular (Secreted)	Classical_secreted		Apoplastic effector	0		Y	-	-	-
EXL97464.1	-		0	SP	0	0	FALSE	TRUE	SP	Cell_membrane	extr	Extracellular (Secreted)	Classical_membrane		Non-effector	0			-	-	-
EXL97490.1	-	Y	0	SP	0	0	FALSE	FALSE	SP	Extracellular	extr	Membrane bound Extracellular (Secreted)	Classical_secreted		Non-effector	0			-	-	-
EXL97502.1	Glyoxal oxidase N-terminus		0	SP	0	0	FALSE	FALSE	SP	Extracellular	extr	Membrane bound Extracellular (Secreted)	Classical_secreted	AA5	Non-effector	0	reduced_virulence		GO	-	ko:K20929
EXL97511.1	Amidohydrolase		0	SP	0	0	FALSE	FALSE	SP	Extracellular	extr	Lysosomal	Classical_secreted		Non-effector	0			S	-	-
EXL97549.1	Glucose sorbosone		0	SP	0	0	FALSE	FALSE	SP	Extracellular	extr	Membrane bound Extracellular (Secreted)	Classical_secreted	AA12	Non-effector	0	reduced_virulence		G	-	-
EXL97581.1	Glycosyl hydrolase family 10	Y	0	SP	0	0	FALSE	FALSE	SP	Extracellular	extr	Extracellular (Secreted)	Classical_secreted	GH10	Non-effector	0	reduced_virulence__increased_virulence_(hypervirulence)		G	-	ko:K01181
EXL97614.1	Belongs to the glycosyl hydrolase 43 family	Y	0	SP	0	0	FALSE	FALSE	SP	Extracellular	extr	Membrane bound Extracellular (Secreted)	Classical_secreted	GH43_5	Apoplastic effector	0	increased_virulence_(hypervirulence)	Y	G	-	ko:K06113
EXL97812.1	-	Y	0	SP	0	0	FALSE	FALSE	SP	Extracellular	extr	Membrane bound Vacuolar	Classical_secreted		Non-effector	0			-	-	-
EXL97828.1	-		0	SP	0	0	FALSE	FALSE	SP	Extracellular	extr	Membrane bound Mitochondrial	Classical_secreted	PL26	Non-effector	0			-	-	-
EXL97924.1	Belongs to the peptidase S8 family		0	SP	0	0	FALSE	FALSE	SP	Extracellular	extr	Cytoplasmic	Classical_secreted		Non-effector	0	unaffected_pathogenicity		O	-	-
EXL97948.1	Hydrophobic surface binding protein A		0	SP	0	0	FALSE	FALSE	SP	Extracellular	extr	Extracellular (Secreted)	Classical_secreted		Cytoplasmic effector	0		Y	S	-	-
EXL97965.1	SCP / Tpx-1 / Ag5 / PR-1 / Sc7 family of extracellular domains.		0	SP	0	0	FALSE	FALSE	SP	Extracellular	extr	Extracellular (Secreted)	Classical_secreted		Cytoplasmic effector	0	unaffected_pathogenicity	Y	S	-	-
EXL97994.1	-		0	SP	0	0	FALSE	FALSE	SP	Extracellular	extr	Plasma membrane	Classical_secreted		Non-effector	0			-	-	-
EXL98057.1	Belongs to the glycosyl hydrolase 43 family		0	SP	0	0	FALSE	FALSE	SP	Extracellular	extr	Membrane bound Extracellular (Secreted)	Classical_secreted	GH43_22	Non-effector	0			G	-	-
EXL98120.1	Glycosyl hydrolase family 65, N-terminal domain	Y	0	SP	0	0	FALSE	FALSE	SP	Extracellular	extr	Membrane bound Extracellular (Secreted)	Classical_secreted	GH65	Non-effector	0	reduced_virulence		G	GO:0000322,GO:0000323,GO:0000324,GO:0001101,GO:0003674,GO:0003824,GO:0004553,GO:0004555,GO:0005575,GO:0005576,GO:0005618,GO:0005622,GO:0005623,GO:0005737,GO:0005773,GO:0005975,GO:0005984,GO:0005991,GO:0005993,GO:0006950,GO:0007154,GO:0008150,GO:0008152,GO:0009056,GO:0009266,GO:0009269,GO:0009277,GO:0009311,GO:0009313,GO:0009409,GO:0009414,GO:0009415,GO:0009605,GO:0009628,GO:0009636,GO:0009987,GO:…	ko:K01194
EXL98131.1	Peptidase A4 family		0	SP	0	0	FALSE	FALSE	SP	Extracellular	extr	Lysosomal	Classical_secreted		Non-effector	0			S	-	-
EXL98263.1	Belongs to the peptidase S8 family		0	SP	0	0	FALSE	FALSE	SP	Extracellular	extr	Membrane bound Extracellular (Secreted)	Classical_secreted		Non-effector	0	unaffected_pathogenicity		O	-	-
EXL98333.1	Glycosyl hydrolase family 61	Y	0	SP	0	0	FALSE	FALSE	SP	Extracellular	extr	Endoplasmic reticulum	Classical_secreted	AA9	Non-effector	0	effector_(plant_avirulence_determinant)	Y	O	-	-
EXL98334.1	Glycosyl hydrolase family 10	Y	0	SP	0	0	FALSE	FALSE	SP	Extracellular	extr	Extracellular (Secreted)	Classical_secreted	GH10	Non-effector	0	reduced_virulence		G	-	ko:K01181
EXL98396.1	Conserved hypothetical protein		0	SP	0	0	FALSE	FALSE	SP	Extracellular	extr	Membrane bound Extracellular (Secreted)	Classical_secreted		Apoplastic effector	0		Y	S	-	-
EXL98832.1	Peroxidase		0	SP	0	0	FALSE	FALSE	SP	Extracellular	extr	Extracellular (Secreted)	Classical_secreted	AA2	Non-effector	0	unaffected_pathogenicity		Q	-	ko:K20205
EXL99084.1	Glycosyl hydrolase family 45	Y	0	SP	0	0	FALSE	FALSE	SP	Extracellular	extr	Membrane bound Extracellular (Secreted)	Classical_secreted	GH45	Apoplastic effector	0		Y	O	GO:0005575,GO:0005576	-
EXL99231.1	alkaline foam protein B precursor		0	SP	0	0	FALSE	FALSE	SP	Extracellular	extr	Extracellular (Secreted)	Classical_secreted		Apoplastic effector	0	effector_(plant_avirulence_determinant)	Y	S	-	-
EXL99245.1	-	Y	0	SP	0	0	FALSE	FALSE	SP	Extracellular	extr	Membrane bound Extracellular (Secreted)	Classical_secreted		Non-effector	0			-	-	-
EXL99286.1	Tri14-like protein		0	SP	0	0	FALSE	FALSE	SP	Extracellular	extr	Membrane bound Lysosomal	Classical_secreted		Non-effector	0			S	-	-
EXL99308.1	-		0	SP	0	0	FALSE	FALSE	SP	Extracellular	extr	Extracellular (Secreted)	Classical_secreted	GH134	Non-effector	0			-	-	-
EXL99417.1	Bacterial alpha-L-rhamnosidase C-terminal domain		0	SP	0	0	FALSE	FALSE	SP	Extracellular	extr	Membrane bound Mitochondrial	Classical_secreted	GH78	Non-effector	0			S	-	-
EXL99476.1	-	Y	0	SP	0	0	FALSE	FALSE	SP	Extracellular	extr	Extracellular (Secreted)	Classical_secreted		Apoplastic effector	0		Y	-	-	-
EXL99481.1	Belongs to the peptidase A1 family	Y	0	SP	0	0	FALSE	FALSE	SP	Extracellular	extr	Membrane bound Extracellular (Secreted)	Classical_secreted		Non-effector	0	reduced_virulence		O	GO:0003674,GO:0003824,GO:0004175,GO:0004190,GO:0005575,GO:0005576,GO:0006508,GO:0006807,GO:0008150,GO:0008152,GO:0008233,GO:0009056,GO:0009057,GO:0016787,GO:0019538,GO:0030163,GO:0043170,GO:0044238,GO:0070001,GO:0070011,GO:0071704,GO:0140096,GO:1901564,GO:1901565,GO:1901575	ko:K06004
EXL99482.1	Belongs to the peptidase A1 family		0	SP	0	0	FALSE	FALSE	SP	Extracellular	extr	Extracellular (Secreted)	Classical_secreted		Apoplastic effector	0	unaffected_pathogenicity__reduced_virulence	Y	O	-	-
EXL99525.1	Glycosyl hydrolases family 28		0	SP	0	0	FALSE	FALSE	SP	Extracellular	extr	Membrane bound Extracellular (Secreted)	Classical_secreted	GH28	Apoplastic effector	0	unaffected_pathogenicity	Y	G	-	ko:K01184,ko:K01213
EXL99543.1	Belongs to the glycosyl hydrolase 18 family		0	SP	0	0	FALSE	FALSE	SP	Extracellular	extr	Membrane bound Extracellular (Secreted)	Classical_secreted	GH18	Non-effector	0	unaffected_pathogenicity		G	-	ko:K01183
EXL99830.1	Peptidase dimerisation domain	Y	0	SP	0	0	FALSE	FALSE	SP	Extracellular	extr	Cytoplasmic	Classical_secreted		Non-effector	0	reduced_virulence		E	GO:0000322,GO:0000323,GO:0000324,GO:0000328,GO:0003674,GO:0003824,GO:0004180,GO:0005575,GO:0005622,GO:0005623,GO:0005737,GO:0005773,GO:0005775,GO:0006508,GO:0006807,GO:0008150,GO:0008152,GO:0008233,GO:0008238,GO:0009056,GO:0009057,GO:0009987,GO:0016787,GO:0019538,GO:0030163,GO:0031974,GO:0043170,GO:0043226,GO:0043227,GO:0043229,GO:0043231,GO:0043233,GO:0044237,GO:0044238,GO:0044248,GO:0044257,GO:…	ko:K01293
EXL99917.1	Cupin	Y	0	SP	0	0	FALSE	FALSE	SP	Extracellular	extr	Membrane bound Mitochondrial	Classical_secreted		Non-effector	0			S	-	-
EXL99918.1	Beta-glucosidase (SUN family)		0	SP	0	0	FALSE	TRUE	SP	Cell_membrane	extr	Plasma membrane	Classical_membrane	GH132	Non-effector	0			S	GO:0000322,GO:0000323,GO:0000324,GO:0003674,GO:0003824,GO:0004553,GO:0005575,GO:0005622,GO:0005623,GO:0005737,GO:0005773,GO:0008422,GO:0009986,GO:0015926,GO:0016787,GO:0016798,GO:0043226,GO:0043227,GO:0043229,GO:0043231,GO:0044424,GO:0044444,GO:0044464	-
EXM00176.1	Belongs to the peptidase M28 family		0	SP	0	0	FALSE	FALSE	SP	Extracellular	extr	Cytoplasmic	Classical_secreted		Non-effector	0	reduced_virulence		O	GO:0000322,GO:0000323,GO:0000324,GO:0005575,GO:0005622,GO:0005623,GO:0005737,GO:0005773,GO:0043226,GO:0043227,GO:0043229,GO:0043231,GO:0044424,GO:0044444,GO:0044464	ko:K05994
EXM00412.1	Plastocyanin-like domain	Y	0	SP	0	0	FALSE	TRUE	SP	Cell_membrane	extr	Extracellular (Secreted)	Classical_membrane		Non-effector	0			S	-	-
EXM00458.1	precursor	Y	0	SP	0	0	FALSE	FALSE	SP	Extracellular	extr	Membrane bound Extracellular (Secreted)	Classical_secreted	GH28	Apoplastic effector	0	reduced_virulence__unaffected_pathogenicity	Y	G	GO:0000272,GO:0003674,GO:0003824,GO:0004553,GO:0004650,GO:0005575,GO:0005576,GO:0005975,GO:0005976,GO:0007124,GO:0008150,GO:0008152,GO:0009056,GO:0009057,GO:0009987,GO:0010393,GO:0016049,GO:0016052,GO:0016787,GO:0016798,GO:0017144,GO:0030447,GO:0040007,GO:0042737,GO:0043170,GO:0044182,GO:0044237,GO:0044238,GO:0044248,GO:0045488,GO:0045490,GO:0070783,GO:0071704,GO:1901575	ko:K01184,ko:K01213
EXM00479.1	GMC oxidoreductase		0	SP	0	0	FALSE	FALSE	SP	Extracellular	extr	Membrane bound Extracellular (Secreted)	Classical_secreted	AA3_2	Non-effector	0	reduced_virulence		E	-	ko:K00108
EXM00596.1	-		0	SP	0	0	FALSE	FALSE	SP	Extracellular	extr	Membrane bound Mitochondrial	Classical_secreted		Non-effector	0			-	-	-
EXM00664.1	Pollen allergen	Y	0	SP	0	0	FALSE	FALSE	SP	Extracellular	extr	Membrane bound Extracellular (Secreted)	Classical_secreted	CBM63	Apoplastic/cytoplasmic effector	0	reduced_virulence	Y	G	-	ko:K20628
EXM00943.1	Belongs to the peptidase A1 family		0	SP	0	0	FALSE	FALSE	SP	Extracellular	extr	Cytoplasmic	Classical_secreted		Non-effector	0	unaffected_pathogenicity		O	GO:0000322,GO:0000323,GO:0000324,GO:0003674,GO:0003824,GO:0004175,GO:0004190,GO:0005575,GO:0005576,GO:0005618,GO:0005622,GO:0005623,GO:0005737,GO:0005739,GO:0005773,GO:0005783,GO:0005886,GO:0006508,GO:0006807,GO:0006914,GO:0006950,GO:0007154,GO:0008104,GO:0008150,GO:0008152,GO:0008233,GO:0009056,GO:0009057,GO:0009267,GO:0009277,GO:0009605,GO:0009897,GO:0009986,GO:0009987,GO:0009991,GO:0012505,GO:…	ko:K01381
EXM00953.1	Belongs to the multicopper oxidase family	Y	0	NO_SP	0	0	FALSE	FALSE	SP	Extracellular	extr	Cytoplasmic	Non-classical_secreted	AA1_3	Non-effector	0	unaffected_pathogenicity		Q	-	-
EXM01033.1	-		0	SP	0	0	FALSE	FALSE	SP	Extracellular	extr	Membrane bound Extracellular (Secreted)	Classical_secreted		Cytoplasmic effector	0		Y	-	GO:0000322,GO:0000323,GO:0000324,GO:0003674,GO:0004857,GO:0004866,GO:0005575,GO:0005622,GO:0005623,GO:0005737,GO:0005773,GO:0006996,GO:0007033,GO:0008150,GO:0009892,GO:0009987,GO:0010466,GO:0010605,GO:0010951,GO:0016043,GO:0019222,GO:0030162,GO:0030234,GO:0030414,GO:0031323,GO:0031324,GO:0032268,GO:0032269,GO:0042144,GO:0043086,GO:0043226,GO:0043227,GO:0043229,GO:0043231,GO:0044092,GO:0044424,GO:…	-
EXM01817.1	Tat pathway signal sequence	Y	0	SP	0	1	FALSE	TRUE	SP	Cell_membrane	extr	Membrane bound Extracellular (Secreted)	Classical_membrane		Non-effector	0			S	-	-
EXM01887.1	-		0	SP	0	0	FALSE	FALSE	SP	Extracellular	extr	Extracellular (Secreted)	Classical_secreted		Apoplastic/cytoplasmic effector	1		Y	-	-	-
EXM02062.1	Zn_pept		0	SP	0	0	FALSE	FALSE	SP	Extracellular	extr	Membrane bound Extracellular (Secreted)	Classical_secreted		Non-effector	0			O	-	-
EXM02101.1	TAP-like protein		0	SP	0	0	FALSE	FALSE	SP	Extracellular	extr	Membrane bound Mitochondrial	Classical_secreted		Non-effector	0			S	-	-
EXM02156.1	CFEM domain		0	SP	0	0	FALSE	TRUE	SP	Cell_membrane	extr	Extracellular (Secreted)	Classical_membrane		Non-effector	0	reduced_virulence		S	-	-
EXM02193.1	Destroys radicals which are normally produced within the cells and which are toxic to biological systems		0	SP	0	0	FALSE	FALSE	SP	Extracellular	extr	Membrane bound Mitochondrial	Classical_secreted		Non-effector	0	reduced_virulence		P	GO:0003674,GO:0005488,GO:0005575,GO:0005622,GO:0005623,GO:0005737,GO:0005739,GO:0005759,GO:0019863,GO:0019865,GO:0030145,GO:0031974,GO:0043167,GO:0043169,GO:0043226,GO:0043227,GO:0043229,GO:0043231,GO:0043233,GO:0044422,GO:0044424,GO:0044429,GO:0044444,GO:0044446,GO:0044464,GO:0044877,GO:0046872,GO:0046914,GO:0070013	ko:K04564
EXM02222.1	Belongs to the glycosyl hydrolase 43 family	Y	0	SP	0	0	FALSE	FALSE	SP	Extracellular	extr	Membrane bound Extracellular (Secreted)	Classical_secreted	GH43_26	Non-effector	0			G	-	-
EXM02296.1	Amidohydrolase family		0	SP	0	0	FALSE	FALSE	SP	Extracellular	extr	Membrane bound Mitochondrial	Classical_secreted		Non-effector	0			G	-	-
EXM02304.1	Common central domain of tyrosinase		0	SP	0	0	FALSE	FALSE	SP	Extracellular	extr	Lysosomal	Classical_secreted		Non-effector	0	unaffected_pathogenicity		S	-	ko:K00505
EXM02409.1	Protein of unknown function (DUF3455)		0	SP	0	0	FALSE	FALSE	SP	Extracellular	extr	Membrane bound Mitochondrial	Classical_secreted		Non-effector	0			S	-	-
EXM02659.1	Asparaginase		0	SP	0	0	FALSE	FALSE	SP	Extracellular	extr	Extracellular (Secreted)	Classical_secreted		Apoplastic effector	0		Y	E	-	ko:K01444
EXM02817.1	phosphatidylglycerol phosphatidylinositol transfer protein		0	SP	0	0	FALSE	FALSE	SP	Extracellular	extr	Extracellular (Secreted)	Classical_secreted		Cytoplasmic effector	0		Y	S	GO:0000322,GO:0000323,GO:0000324,GO:0000328,GO:0005575,GO:0005576,GO:0005622,GO:0005623,GO:0005737,GO:0005773,GO:0005775,GO:0006810,GO:0006869,GO:0008150,GO:0009987,GO:0010876,GO:0015850,GO:0015918,GO:0016043,GO:0031974,GO:0032365,GO:0032366,GO:0033036,GO:0043226,GO:0043227,GO:0043229,GO:0043231,GO:0043233,GO:0044422,GO:0044424,GO:0044437,GO:0044444,GO:0044446,GO:0044464,GO:0046907,GO:0051179,GO:…	-
EXM02842.1	Podospora anserina S mat genomic DNA chromosome	Y	0	SP	0	0	FALSE	FALSE	SP	Extracellular	plas	Extracellular (Secreted)	Classical_secreted		Non-effector	0	reduced_virulence	Y	S	-	-
EXM02859.1	-	Y	0	SP	0	0	FALSE	TRUE	SP	Cell_membrane	extr	Plasma membrane	Classical_membrane		Non-effector	0			-	-	-
EXM02930.1	Common central domain of tyrosinase		0	SP	0	0	FALSE	FALSE	SP	Extracellular	extr	Membrane bound Lysosomal	Classical_secreted		Non-effector	0	unaffected_pathogenicity		S	-	ko:K00505
EXM03016.1	endonuclease exonuclease phosphatase family protein		0	SP	0	0	FALSE	FALSE	SP	Extracellular	extr	Membrane bound Extracellular (Secreted)	Classical_secreted		Non-effector	0	unaffected_pathogenicity		O	-	-
EXM03120.1	Belongs to the peptidase M28 family		0	SP	0	0	FALSE	FALSE	SP	Endoplasmic_reticulum	extr	Membrane bound Mitochondrial	Classical_secreted		Non-effector	0			O	GO:0005575,GO:0005622,GO:0005623,GO:0005737,GO:0005783,GO:0012505,GO:0043226,GO:0043227,GO:0043229,GO:0043231,GO:0044424,GO:0044444,GO:0044464	ko:K00683
EXM03174.1	Belongs to the peptidase S8 family		0	SP	0	0	FALSE	FALSE	SP	Extracellular	extr	Cytoplasmic	Classical_secreted		Non-effector	0	unaffected_pathogenicity		O	-	-
EXM03333.1	Glycosyl hydrolases family 16		0	SP	0	1	FALSE	TRUE	SP	Cell_membrane	extr	Membrane bound Extracellular (Secreted)	Classical_membrane	GH16_18	Non-effector	0			G	-	-
EXM03335.1	Pectate lyase B precursor	Y	0	SP	0	0	FALSE	TRUE	SP	Extracellular	extr	Cytoplasmic	Classical_membrane	PL1_7	Apoplastic effector	0	reduced_virulence		H	-	ko:K01728
EXM03458.1	Peptidase A4 family		0	SP	0	0	FALSE	FALSE	SP	Extracellular	extr	Membrane bound Extracellular (Secreted)	Classical_secreted		Non-effector	0			S	-	-
EXM03472.1	Subtilase family	Y	0	SP	0	0	FALSE	FALSE	SP	Extracellular	extr	Cytoplasmic	Classical_secreted		Non-effector	0	unaffected_pathogenicity		O	-	-
EXM03570.1	Carbohydrate-binding module family 63 protein		0	SP	0	0	FALSE	FALSE	SP	Extracellular	extr	Extracellular (Secreted)	Classical_secreted	CBM63	Apoplastic effector	0		Y	S	-	ko:K20628
EXM03600.1	Serine aminopeptidase, S33		0	SP	0	0	FALSE	FALSE	SP	Extracellular	extr	Membrane bound Extracellular (Secreted)	Classical_secreted		Non-effector	0			S	-	-
EXM03604.1	Belongs to the peptidase A1 family		0	SP	0	0	FALSE	FALSE	SP	Extracellular	extr	Membrane bound Extracellular (Secreted)	Classical_secreted		Non-effector	0	reduced_virulence		O	-	-
EXM03613.1	Lytic polysaccharide mono-oxygenase, cellulose-degrading		0	SP	0	0	FALSE	FALSE	SP	Extracellular	extr	Membrane bound Golgi	Classical_secreted	AA16	Cytoplasmic effector	0		Y	S	-	-
EXM03672.1	Chitin binding domain	Y	0	SP	0	0	FALSE	FALSE	SP	Extracellular	extr	Membrane bound Extracellular (Secreted)	Classical_secreted	CE4	Apoplastic effector	0	unaffected_pathogenicity	Y	O	-	-
EXM03694.1	GPI anchored protein		0	SP	0	0	FALSE	TRUE	SP	Cell_membrane	extr	Golgi	Classical_membrane		Apoplastic effector	0			S	-	-
EXM03711.1	Belongs to the peptidase S8 family		0	SP	0	0	FALSE	FALSE	SP	Extracellular	extr	Membrane bound Extracellular (Secreted)	Classical_secreted		Non-effector	0	unaffected_pathogenicity		O	-	-
EXM03792.1	to glucan 1,3-beta-glucosidase GLUC78 precursor		0	SP	0	0	FALSE	FALSE	SP	Extracellular	extr	Membrane bound Extracellular (Secreted)	Classical_secreted	GH55	Non-effector	0			G	-	ko:K01210
EXM03907.1	-	Y	0	SP	0	0	FALSE	FALSE	SP	Extracellular	extr	Membrane bound Extracellular (Secreted)	Classical_secreted		Apoplastic/cytoplasmic effector	1		Y	-	-	-
EXM03986.1	-	Y	0	SP	0	0	FALSE	FALSE	SP	Extracellular	extr	Membrane bound Extracellular (Secreted)	Classical_secreted		Apoplastic/cytoplasmic effector	1		Y	-	-	-
EXM04317.1	Domain of unknown function (DUF1996)		0	SP	0	0	FALSE	FALSE	SP	Extracellular	extr	Extracellular (Secreted)	Classical_secreted		Non-effector	0			S	-	-
EXM04403.1	GMC oxidoreductase	Y	0	SP	0	0	FALSE	FALSE	SP	Extracellular	extr	Membrane bound Extracellular (Secreted)	Classical_secreted	AA3_2	Non-effector	0	reduced_virulence		E	-	ko:K00108
EXM04484.1	FAD binding domain		0	SP	0	0	FALSE	FALSE	SP	Extracellular	extr	Membrane bound Lysosomal	Classical_secreted		Non-effector	0	reduced_virulence		C	-	-
EXM04503.1	Amidase		0	SP	0	0	FALSE	FALSE	SP	Extracellular	extr	Membrane bound Extracellular (Secreted)	Classical_secreted		Non-effector	0	reduced_virulence		J	-	-
EXM04683.1	-		0	SP	0	0	FALSE	FALSE	SP	Extracellular	extr	Extracellular (Secreted)	Classical_secreted		Apoplastic/cytoplasmic effector	1		Y	-	-	-
EXM04728.1	Ferritin-like domain	Y	0	SP	0	0	FALSE	FALSE	SP	Extracellular	extr	Membrane bound Extracellular (Secreted)	Classical_secreted		Non-effector	0			S	-	-
EXM04740.1	to palmitoyl-protein thioesterase precursor		0	SP	0	0	FALSE	FALSE	SP	Endoplasmic_reticulum	extr	Cytoplasmic	Classical_secreted		Non-effector	0	reduced_virulence		IO	GO:0002084,GO:0003674,GO:0003824,GO:0005575,GO:0005622,GO:0005623,GO:0005737,GO:0005783,GO:0005789,GO:0006464,GO:0006486,GO:0006487,GO:0006629,GO:0006643,GO:0006665,GO:0006807,GO:0006873,GO:0006885,GO:0007035,GO:0008150,GO:0008152,GO:0008474,GO:0008610,GO:0009056,GO:0009057,GO:0009058,GO:0009059,GO:0009100,GO:0009101,GO:0009987,GO:0012505,GO:0016020,GO:0016021,GO:0016462,GO:0016787,GO:0016788,GO:…	ko:K01074
EXM04911.1	to trehalase precursor		0	SP	0	0	FALSE	FALSE	SP	Extracellular	extr	Membrane bound Extracellular (Secreted)	Classical_secreted	GH37	Non-effector	0	unaffected_pathogenicity		G	-	ko:K01194
EXM05264.1	Belongs to the arginase family	Y	1	SP	0	0	FALSE	FALSE	SP	Extracellular	extr	Cytoplasmic			Non-effector	0	reduced_virulence__unaffected_pathogenicity		G	GO:0003674,GO:0003824,GO:0005488,GO:0006082,GO:0006520,GO:0006807,GO:0008150,GO:0008152,GO:0008783,GO:0009987,GO:0016787,GO:0016810,GO:0016813,GO:0019627,GO:0019752,GO:0030145,GO:0034641,GO:0043167,GO:0043169,GO:0043436,GO:0043603,GO:0044237,GO:0044238,GO:0044281,GO:0046872,GO:0046914,GO:0071704,GO:0071941,GO:1901564	ko:K01480
EXM05324.1	Belongs to the peptidase A1 family		0	SP	0	0	FALSE	TRUE	SP	Cell_membrane	extr	Membrane bound Extracellular (Secreted)	Classical_membrane		Non-effector	0	unaffected_pathogenicity__reduced_virulence__increased_virulence_(hypervirulence)		O	-	-
EXM05331.1	Glycosyl hydrolase family 61	Y	0	SP	0	0	FALSE	FALSE	SP	Extracellular	extr	Extracellular (Secreted)	Classical_secreted	AA9	Non-effector	0	effector_(plant_avirulence_determinant)	Y	O	-	-
EXM05355.1	Endonuclease/Exonuclease/phosphatase family	Y	0	SP	0	0	FALSE	FALSE	SP	Extracellular	extr	Membrane bound Extracellular (Secreted)	Classical_secreted		Non-effector	0	unaffected_pathogenicity		G	-	-
EXM05414.1	Amidase		0	SP	0	0	FALSE	FALSE	SP	Extracellular	extr	Membrane bound Mitochondrial	Classical_secreted		Non-effector	0	reduced_virulence		J	GO:0003674,GO:0003824,GO:0016787,GO:0016810,GO:0016811	ko:K01426
EXM05524.1	cell wall protein		0	SP	0	0	FALSE	FALSE	SP	Extracellular	extr	Lysosomal	Classical_secreted		Apoplastic/cytoplasmic effector	0		Y	S	GO:0000003,GO:0000905,GO:0003006,GO:0005575,GO:0005576,GO:0007049,GO:0007275,GO:0008150,GO:0009653,GO:0009987,GO:0019953,GO:0019954,GO:0022402,GO:0022414,GO:0030154,GO:0030435,GO:0030582,GO:0030584,GO:0032501,GO:0032502,GO:0034293,GO:0043934,GO:0043935,GO:0044703,GO:0048468,GO:0048608,GO:0048646,GO:0048731,GO:0048856,GO:0048869,GO:0051321,GO:0051704,GO:0061458,GO:0070787,GO:0070790,GO:0075259,GO:…	-
EXM05562.1	-		0	SP	0	1	FALSE	TRUE	SP	Cell_membrane	extr	Extracellular (Secreted)	Classical_membrane		Non-effector	0			-	-	-
EXM05702.1	allergen asp		0	SP	0	0	FALSE	FALSE	SP	Extracellular	extr	Extracellular (Secreted)	Classical_secreted		Apoplastic effector	0		Y	S	GO:0003674,GO:0005488,GO:0019863,GO:0019865,GO:0044877	-
EXM05769.1	Alternaria alternata allergen 1		0	SP	0	0	FALSE	FALSE	SP	Extracellular	extr	Membrane bound Extracellular (Secreted)	Classical_secreted		Cytoplasmic/apoplastic effector	0		Y	S	-	-
EXM06067.1	Late sexual development protein		0	SP	0	0	FALSE	FALSE	SP	Extracellular	extr	Membrane bound Endoplasmic reticulum	Classical_secreted		Non-effector	0			S	-	-
EXM06146.1	Amb_all	Y	0	SP	0	0	FALSE	FALSE	SP	Extracellular	extr	Membrane bound Extracellular (Secreted)	Classical_secreted	PL1_9	Apoplastic effector	0	reduced_virulence__increased_virulence_(hypervirulence)	Y	G	-	ko:K01728
EXM06156.1	Belongs to the peroxidase family		0	SP	0	0	FALSE	FALSE	SP	Extracellular	extr	Membrane bound Mitochondrial	Classical_secreted	AA2	Non-effector	0	reduced_virulence		E	-	-
EXM06220.1	Belongs to the sulfatase family	Y	0	SP	0	0	FALSE	FALSE	SP	Extracellular	extr	Cytoplasmic	Classical_secreted		Non-effector	0			G	-	ko:K01130
EXM06226.1	-		0	SP	0	0	FALSE	FALSE	SP	Extracellular	extr	Extracellular (Secreted)	Classical_secreted		Apoplastic effector	0		Y	-	-	-
EXM06836.1	-		0	SP	0	0	FALSE	FALSE	SP	Extracellular	mito	Membrane bound Extracellular (Secreted)	Classical_secreted		Apoplastic/cytoplasmic effector	0		Y	-	-	-
EXM06918.1	-		0	SP	0	0	FALSE	FALSE	SP	Extracellular	extr	Membrane bound Extracellular (Secreted)	Classical_secreted	AA11	Apoplastic effector	0		Y	-	-	-
EXM07013.1	Splits internally a 1,3-beta-glucan molecule and transfers the newly generated reducing end (the donor) to the non- reducing end of another 1,3-beta-glucan molecule (the acceptor) forming a 1,3-beta linkage, resulting in the elongation of 1,3- beta-glucan chains in the cell wall		0	SP	0	0	FALSE	TRUE	SP	Cell_membrane	extr	Membrane bound Extracellular (Secreted)	Classical_membrane	GH72	Non-effector	0	reduced_virulence		G	GO:0000003,GO:0000271,GO:0000322,GO:0000323,GO:0000324,GO:0003006,GO:0003674,GO:0003824,GO:0005575,GO:0005618,GO:0005622,GO:0005623,GO:0005737,GO:0005773,GO:0005886,GO:0005975,GO:0005976,GO:0006073,GO:0006074,GO:0006075,GO:0007049,GO:0008150,GO:0008152,GO:0009058,GO:0009059,GO:0009250,GO:0009272,GO:0009277,GO:0009653,GO:0009897,GO:0009986,GO:0009987,GO:0010383,GO:0010927,GO:0016020,GO:0016021,GO:…	-
EXM07040.1	Necrosis inducing protein (NPP1)		0	SP	0	0	FALSE	FALSE	SP	Extracellular	extr	Membrane bound Extracellular (Secreted)	Classical_secreted		Apoplastic effector	0	reduced_virulence	Y	S	-	-
EXM07111.1	Belongs to the GMC oxidoreductase family	Y	0	SP	0	0	FALSE	FALSE	SP	Extracellular	extr	Membrane bound Mitochondrial	Classical_secreted	AA3_1	Non-effector	0	reduced_virulence		E	-	ko:K19069
EXM07114.1	Domain of unknown function (DUF1996)		0	SP	0	0	FALSE	FALSE	SP	Extracellular	extr	Membrane bound Endoplasmic reticulum	Classical_secreted		Non-effector	0			S	-	-
EXM07124.1	-		0	NO_SP	0	0	FALSE	FALSE	SP	Extracellular	extr	Membrane bound Extracellular (Secreted)	Non-classical_secreted		Non-effector	0			-	-	-
EXM07173.1	FMN-dependent dehydrogenase		0	SP	0	0	FALSE	FALSE	SP	Extracellular	extr	Mitochondrial	Classical_secreted		Non-effector	0	reduced_virulence		C	-	ko:K00101
EXM07253.1	to acid phosphatase	Y	0	SP	0	0	FALSE	FALSE	SP	Extracellular	extr	Membrane bound Golgi	Classical_secreted		Non-effector	0			S	-	ko:K03787
EXM07468.1	Survival protein SurE		0	SP	0	0	FALSE	FALSE	SP	Extracellular	extr	Membrane bound Extracellular (Secreted)	Classical_secreted		Apoplastic effector	0		Y	S	GO:0005575,GO:0005576	ko:K03787
EXM07486.1	Glycosyl hydrolase family 49 N-terminal Ig-like domain		0	SP	0	0	FALSE	FALSE	SP	Extracellular	extr	Cytoplasmic	Classical_secreted	GH49	Non-effector	0			S	-	-
EXM07514.1	Glyco_18		0	SP	0	0	FALSE	FALSE	SP	Extracellular	extr	Plasma membrane	Classical_secreted	GH18	Non-effector	0	effector_(plant_avirulence_determinant)	Y	G	-	-
EXM07533.1	-	Y	0	SP	0	0	FALSE	FALSE	SP	Extracellular	extr	Membrane bound Peroxisomal	Classical_secreted		Non-effector	0			-	-	-
EXM07600.1	cfem domain-containing protein	Y	0	SP	0	0	FALSE	FALSE	SP	Extracellular	extr	Membrane bound Extracellular (Secreted)	Classical_secreted		Non-effector	0			S	GO:0000128,GO:0000322,GO:0000323,GO:0000324,GO:0001403,GO:0005575,GO:0005576,GO:0005622,GO:0005623,GO:0005737,GO:0005773,GO:0005886,GO:0005933,GO:0005935,GO:0007124,GO:0007155,GO:0008150,GO:0009987,GO:0016020,GO:0016049,GO:0022610,GO:0030427,GO:0030447,GO:0031589,GO:0036267,GO:0036281,GO:0040007,GO:0042710,GO:0043226,GO:0043227,GO:0043229,GO:0043231,GO:0043708,GO:0043709,GO:0044010,GO:0044011,GO:…	ko:K19851,ko:K22493
EXM07751.1	-	Y	0	SP	0	0	FALSE	TRUE	SP	Extracellular	extr	Extracellular (Secreted)	Classical_membrane		Apoplastic effector	0			-	-	-
EXM07855.1	Belongs to the alkaline phosphatase family	Y	0	SP	0	0	FALSE	FALSE	SP	Extracellular	extr	Membrane bound Mitochondrial	Classical_secreted		Non-effector	0	reduced_virulence		P	-	-
EXM08012.1	Belongs to the protein disulfide isomerase family		1	SP	0	0	FALSE	FALSE	SP	Endoplasmic_reticulum	extr	Endoplasmic reticulum			Non-effector	0	reduced_virulence__unaffected_pathogenicity		O	GO:0003674,GO:0003756,GO:0003824,GO:0005488,GO:0005515,GO:0005575,GO:0005622,GO:0005623,GO:0005737,GO:0005783,GO:0006457,GO:0006950,GO:0006979,GO:0008150,GO:0008152,GO:0009987,GO:0012505,GO:0015035,GO:0015036,GO:0016491,GO:0016667,GO:0016853,GO:0016860,GO:0016864,GO:0033554,GO:0034599,GO:0034975,GO:0034976,GO:0042221,GO:0043226,GO:0043227,GO:0043229,GO:0043231,GO:0044424,GO:0044444,GO:0044464,GO:…	ko:K09584
EXM08445.1	Secreted protein		0	SP	0	0	FALSE	FALSE	SP	Extracellular	extr	Membrane bound Extracellular (Secreted)	Classical_secreted		Non-effector	0			S	-	-
EXM08517.1	Belongs to the glycosyl hydrolase 31 family	Y	0	SP	0	0	FALSE	FALSE	SP	Extracellular	extr	Plasma membrane	Classical_secreted	GH31	Non-effector	0	reduced_virulence		G	GO:0000023,GO:0000025,GO:0000272,GO:0003674,GO:0003824,GO:0004553,GO:0005575,GO:0005576,GO:0005618,GO:0005623,GO:0005975,GO:0005976,GO:0005984,GO:0008150,GO:0008152,GO:0009056,GO:0009057,GO:0009311,GO:0009313,GO:0009987,GO:0015926,GO:0016020,GO:0016052,GO:0016787,GO:0016798,GO:0030312,GO:0032450,GO:0042710,GO:0043170,GO:0044010,GO:0044011,GO:0044237,GO:0044238,GO:0044247,GO:0044248,GO:0044260,GO:…	ko:K01187
EXM08521.1	GMC oxidoreductase		0	SP	0	0	FALSE	FALSE	SP	Extracellular	extr	Membrane bound Mitochondrial	Classical_secreted	AA3_2	Non-effector	0	reduced_virulence		E	-	ko:K00108,ko:K17646
EXM08571.1	Bacterial extracellular solute-binding protein		0	SP	0	0	FALSE	FALSE	SP	Extracellular	extr	Membrane bound Extracellular (Secreted)	Classical_secreted		Non-effector	0			P	-	-
EXM08621.1	-	Y	0	SP	0	0	FALSE	FALSE	SP	Extracellular	extr	Membrane bound Extracellular (Secreted)	Classical_secreted		Apoplastic effector	1		Y	-	-	-
EXM08670.1	cell wall protein		0	SP	0	0	FALSE	FALSE	SP	Extracellular	extr	Extracellular (Secreted)	Classical_secreted		Cytoplasmic effector	0		Y	S	-	-
EXM08674.1	-		0	SP	0	0	FALSE	FALSE	SP	Extracellular	extr	Extracellular (Secreted)	Classical_secreted		Apoplastic/cytoplasmic effector	1		Y	-	-	-
EXM08794.1	Metal-independent alpha-mannosidase (GH125)		0	SP	0	0	FALSE	FALSE	SP	Extracellular	extr	Cytoplasmic	Classical_secreted	GH125	Non-effector	0	reduced_virulence		S	GO:0003674,GO:0003824,GO:0004553,GO:0004559,GO:0005975,GO:0005996,GO:0006013,GO:0008150,GO:0008152,GO:0009056,GO:0015923,GO:0016052,GO:0016787,GO:0016798,GO:0019309,GO:0019318,GO:0019320,GO:0044238,GO:0044281,GO:0044282,GO:0046365,GO:0071704,GO:1901575	ko:K09704
EXM08842.1	Belongs to the glycosyl hydrolase 5 (cellulase A) family		0	SP	0	0	FALSE	FALSE	SP	Extracellular	extr	Membrane bound Lysosomal	Classical_secreted	GH5_15	Non-effector	0	reduced_virulence		G	-	ko:K22277
EXM09376.1	Metal-independent alpha-mannosidase (GH125)		0	SP	0	0	FALSE	FALSE	SP	Extracellular	extr	Cytoplasmic	Classical_secreted	GH125	Non-effector	0	reduced_virulence		S	-	ko:K09704
EXM09520.1	S1/P1 Nuclease		1	SP	0	0	FALSE	FALSE	SP	Endoplasmic_reticulum	extr	Membrane bound Extracellular (Secreted)			Non-effector	0	unaffected_pathogenicity		S	-	-
EXM09601.1	Four repeated domains in the Fasciclin I family of proteins, present in many other contexts.	Y	0	SP	0	0	FALSE	TRUE	SP	Extracellular	extr	Cytoplasmic	Classical_membrane		Non-effector	0	reduced_virulence		MW	-	-
EXM09681.1	Domain of unknown function (DUF1996)	Y	0	SP	0	0	FALSE	FALSE	SP	Extracellular	extr	Extracellular (Secreted)	Classical_secreted		Non-effector	0			S	-	-
EXM09789.1	-		0	SP	0	0	FALSE	FALSE	SP	Extracellular	extr	Extracellular (Secreted)	Classical_secreted		Cytoplasmic/apoplastic effector	0		Y	-	-	-
EXM09836.1	Belongs to the glycosyl hydrolase 5 (cellulase A) family	Y	0	SP	0	0	FALSE	FALSE	SP	Extracellular	extr	Membrane bound Extracellular (Secreted)	Classical_secreted	GH5_5	Non-effector	0	unaffected_pathogenicity		G	-	ko:K01179
EXM09897.1	Autophagy-related protein 27	Y	0	SP	0	0	FALSE	FALSE	SP	Extracellular	extr	Extracellular (Secreted)	Classical_secreted		Cytoplasmic effector	0	unaffected_pathogenicity	Y	U	-	ko:K21141
EXM10008.1	FMN-dependent dehydrogenase		0	SP	0	0	FALSE	FALSE	SP	Extracellular	extr	Cytoplasmic	Classical_secreted		Non-effector	0	reduced_virulence		C	-	ko:K00101
EXM10144.1	Serine carboxypeptidase S28		0	SP	0	0	FALSE	FALSE	SP	Extracellular	extr	Extracellular (Secreted)	Classical_secreted		Non-effector	0			O	-	-
EXM10220.1	FKBP-type peptidyl-prolyl cis-trans isomerase		1	SP	0	0	FALSE	FALSE	SP	Cytoplasm	extr	Cytoplasmic			Non-effector	0	reduced_virulence__unaffected_pathogenicity__increased_virulence_(hypervirulence)		O	GO:0000322,GO:0000323,GO:0000324,GO:0000413,GO:0003674,GO:0003755,GO:0003824,GO:0005488,GO:0005527,GO:0005528,GO:0005575,GO:0005622,GO:0005623,GO:0005634,GO:0005737,GO:0005773,GO:0005783,GO:0005789,GO:0006457,GO:0006464,GO:0006807,GO:0008144,GO:0008150,GO:0008152,GO:0009987,GO:0010033,GO:0012505,GO:0016020,GO:0016853,GO:0016859,GO:0018193,GO:0018208,GO:0019538,GO:0031984,GO:0033993,GO:0036211,GO:…	ko:K09569,ko:K09577
EXM10309.1	Glycoside-hydrolase family GH114		0	SP	0	0	FALSE	FALSE	SP	Extracellular	extr	Cytoplasmic	Classical_secreted	GH114	Non-effector	0			O	-	-
EXM10311.1	Beta-glucosidase (SUN family)		0	SP	0	0	FALSE	FALSE	SP	Extracellular	extr	Membrane bound Extracellular (Secreted)	Classical_secreted	GH132	Apoplastic effector	0		Y	S	GO:0000272,GO:0003674,GO:0003824,GO:0004553,GO:0005488,GO:0005575,GO:0005576,GO:0005618,GO:0005622,GO:0005623,GO:0005737,GO:0005739,GO:0005759,GO:0005783,GO:0005975,GO:0005976,GO:0006073,GO:0006074,GO:0006076,GO:0006996,GO:0007005,GO:0008150,GO:0008152,GO:0008422,GO:0009056,GO:0009057,GO:0009251,GO:0009277,GO:0009986,GO:0009987,GO:0012505,GO:0015926,GO:0016043,GO:0016052,GO:0016787,GO:0016798,GO:…	ko:K01238
EXM10495.1	beta-acetyl hexosaminidase like		0	SP	0	0	FALSE	FALSE	SP	Extracellular	extr	Endoplasmic reticulum	Classical_secreted	GH20	Non-effector	0	reduced_virulence		G	-	ko:K12373
EXM10570.1	-	Y	0	SP	0	0	FALSE	FALSE	SP	Extracellular	extr	Extracellular (Secreted)	Classical_secreted		Non-effector	0			-	-	-
EXM10706.1	pci domain-containing protein		0	SP	0	0	FALSE	TRUE	SP	Cell_membrane	extr	Extracellular (Secreted)	Classical_membrane		Cytoplasmic effector	0			S	-	-
EXM10840.1	Glycosyl hydrolases family 18		0	SP	0	0	FALSE	FALSE	SP	Extracellular	extr	Membrane bound Extracellular (Secreted)	Classical_secreted	GH18	Non-effector	0	reduced_virulence		G	GO:0003674,GO:0003824,GO:0004553,GO:0004568,GO:0005488,GO:0005575,GO:0005576,GO:0005622,GO:0005623,GO:0005737,GO:0006022,GO:0006026,GO:0006030,GO:0006032,GO:0006040,GO:0006807,GO:0008061,GO:0008144,GO:0008150,GO:0008152,GO:0009056,GO:0009057,GO:0009653,GO:0009987,GO:0016787,GO:0016798,GO:0017144,GO:0030154,GO:0030435,GO:0032502,GO:0042737,GO:0043170,GO:0043934,GO:0044237,GO:0044248,GO:0044424,GO:…	ko:K01183
EXM11069.1	Belongs to the polysaccharide lyase 4 family		0	SP	0	0	FALSE	FALSE	SP	Extracellular	extr	Extracellular (Secreted)	Classical_secreted	PL4_1	Non-effector	0			G	-	ko:K18195
EXM11311.1	Extracellular matrix protein		0	SP	0	1	FALSE	TRUE	SP	Cell_membrane	extr	Extracellular (Secreted)	Classical_membrane		Non-effector	0	reduced_virulence		S	GO:0005575,GO:0005623,GO:0009986,GO:0044464	-
EXM11756.1	Glycosyl hydrolase catalytic core		0	SP	0	0	FALSE	FALSE	SP	Extracellular	extr	Mitochondrial	Classical_secreted	GH128	Non-effector	0			O	-	-
ENH60717.1	Proteasome component C5		0	NO_SP	0	0	FALSE	FALSE	noTP	Plastid	cyto	Cytoplasmic			Non-effector	0			O	GO:0000502,GO:0005575,GO:0005622,GO:0005623,GO:0005634,GO:0005737,GO:0005783,GO:0005789,GO:0005829,GO:0005839,GO:0006508,GO:0006511,GO:0006807,GO:0007088,GO:0007346,GO:0008150,GO:0008152,GO:0009056,GO:0009057,GO:0009896,GO:0009987,GO:0010498,GO:0010499,GO:0010564,GO:0010638,GO:0010965,GO:0012505,GO:0016020,GO:0019538,GO:0019748,GO:0019774,GO:0019941,GO:0030071,GO:0030163,GO:0031331,GO:0031597,GO:…	ko:K02732
ENH68402.1	-		0	NO_SP	1	1	FALSE	FALSE	mTP	Mitochondrion	mito	Membrane bound Mitochondrial			Cytoplasmic effector	0			-	-	-
ENH69246.1	-	Y	0	NO_SP	0	0	FALSE	FALSE	noTP	Cytoplasm	cyto	Mitochondrial			Cytoplasmic/apoplastic effector	0			-	-	-
ENH72304.1	Amidase	Y	0	NO_SP	0	0	FALSE	FALSE	noTP	Extracellular	extr	Membrane bound Extracellular (Secreted)	Non-classical_secreted		Non-effector	0	reduced_virulence		J	-	-
ENH74777.1	-	Y	0	NO_SP	0	0	FALSE	FALSE	noTP	Plastid	nucl	Extracellular (Secreted)			Apoplastic/cytoplasmic effector	0			-	-	-
EXL89931.1	-		0	NO_SP	0	0	FALSE	FALSE	noTP	Extracellular	nucl	Extracellular (Secreted)	Non-classical_secreted		Cytoplasmic/apoplastic effector	1		Y	-	-	-
EXL90320.1	-	Y	0	NO_SP	1	1	FALSE	FALSE	noTP	Cell_membrane	plas	Plasma membrane	Classical_membrane		Non-effector	0			-	-	-
EXL90873.1	nascent polypeptide-associated complex		0	NO_SP	0	0	FALSE	FALSE	noTP	Nucleus	nucl	Cytoplasmic			Cytoplasmic effector	0			U	GO:0003674,GO:0005488,GO:0005515,GO:0005543,GO:0005575,GO:0005622,GO:0005623,GO:0005737,GO:0005840,GO:0005844,GO:0005854,GO:0006457,GO:0006458,GO:0006605,GO:0006612,GO:0006620,GO:0006810,GO:0006886,GO:0008104,GO:0008150,GO:0008289,GO:0009986,GO:0009987,GO:0015031,GO:0015833,GO:0032266,GO:0032991,GO:0033036,GO:0033365,GO:0034613,GO:0035091,GO:0042788,GO:0042886,GO:0043167,GO:0043168,GO:0043226,GO:…	ko:K03626
EXL90875.1	ribosomal protein		0	NO_SP	0	0	FALSE	FALSE	noTP	Cytoplasm	cyto	Cytoplasmic			Cytoplasmic effector	0			J	-	ko:K02875
EXL90877.1	-		0	NO_SP	0	0	FALSE	FALSE	noTP	Nucleus	nucl	Nuclear			Cytoplasmic effector	0			-	-	-
EXL91054.1	Platelet-activating factor acetylhydrolase, isoform II	Y	0	SP	0	0	FALSE	FALSE	SP	Mitochondrion	extr	Membrane bound Mitochondrial	Classical_secreted		Non-effector	0			I	-	-
EXL91083.1	-		0	NO_SP	4	4	FALSE	FALSE	noTP	Cell_membrane	plas	Plasma membrane	Classical_membrane		Non-effector	0			-	-	-
EXL91630.1	Alpha/beta hydrolase family		0	SP	0	0	FALSE	FALSE	noTP	Plastid	extr	Membrane bound Mitochondrial			Non-effector	0			S	-	-
EXL91659.1	Lysin motif	Y	0	NO_SP	1	1	FALSE	FALSE	noTP	Endoplasmic_reticulum	plas	Plasma membrane	Classical_membrane		Cytoplasmic effector	0	unaffected_pathogenicity		S	-	-
EXL91706.1	Belongs to the glycosyl hydrolase 12 (cellulase H) family		0	NO_SP	1	0	FALSE	FALSE	SP	Extracellular	extr	Membrane bound Endoplasmic reticulum	Classical_membrane	GH12	Non-effector	0			G	-	-
EXL91720.1	Catalyzes the ATP-dependent amination of UTP to CTP with either L-glutamine or ammonia as the source of nitrogen	Y	0	NO_SP	1	0	FALSE	FALSE	noTP	Cytoplasm	extr	Membrane bound Mitochondrial			Non-effector	0			F	GO:0000322,GO:0000323,GO:0000324,GO:0003674,GO:0003824,GO:0003883,GO:0005575,GO:0005622,GO:0005623,GO:0005737,GO:0005773,GO:0005829,GO:0006139,GO:0006206,GO:0006207,GO:0006213,GO:0006220,GO:0006221,GO:0006241,GO:0006629,GO:0006644,GO:0006725,GO:0006753,GO:0006793,GO:0006796,GO:0006807,GO:0008150,GO:0008152,GO:0008610,GO:0008654,GO:0009058,GO:0009112,GO:0009116,GO:0009117,GO:0009119,GO:0009141,GO:…	ko:K01937
EXL91795.1	-	Y	0	NO_SP	0	0	FALSE	FALSE	noTP	Cytoplasm	nucl	Membrane bound Mitochondrial			Non-effector	0			-	-	-
EXL92062.1	to NADP-dependent alcohol dehydrogenase	Y	0	NO_SP	0	0	FALSE	FALSE	noTP	Peroxisome	plas	Cytoplasmic			Non-effector	0	reduced_virulence		Q	-	ko:K00002
EXL92283.1	FAD dependent oxidoreductase		0	NO_SP	1	2	FALSE	FALSE	noTP	Golgi_apparatus	plas	Membrane bound Mitochondrial			Non-effector	0			S	-	-
EXL92433.1	2-oxoacid dehydrogenases acyltransferase (catalytic domain)		0	NO_SP	0	0	FALSE	FALSE	mTP	Mitochondrion	mito	Membrane bound Mitochondrial			Cytoplasmic effector	0	unaffected_pathogenicity		C	GO:0000002,GO:0003674,GO:0003824,GO:0004149,GO:0005575,GO:0005622,GO:0005623,GO:0005737,GO:0005739,GO:0005759,GO:0005947,GO:0006082,GO:0006091,GO:0006099,GO:0006101,GO:0006103,GO:0006996,GO:0007005,GO:0008150,GO:0008152,GO:0009060,GO:0009295,GO:0009353,GO:0009987,GO:0015980,GO:0016043,GO:0016417,GO:0016740,GO:0016746,GO:0016747,GO:0016748,GO:0016751,GO:0016999,GO:0017144,GO:0019752,GO:0030062,GO:…	ko:K00658
EXL92595.1	FAD binding domain	Y	0	NO_SP	0	0	FALSE	FALSE	noTP	Extracellular	mito	Membrane bound Mitochondrial			Non-effector	0	reduced_virulence		C	-	-
EXL92838.1	-		0	NO_SP	1	1	FALSE	FALSE	noTP	Golgi_apparatus	golg	Extracellular (Secreted)			Non-effector	0			-	-	-
EXL92954.1	Pro-kumamolisin, activation domain		0	NO_SP	0	0	FALSE	FALSE	SP	Extracellular	extr	Membrane bound Extracellular (Secreted)	Non-classical_secreted		Non-effector	0	unaffected_pathogenicity		O	-	ko:K01279
EXL93175.1	Fungal specific transcription factor domain	Y	0	NO_SP	0	0	FALSE	FALSE	noTP	Nucleus	nucl	Membrane bound Mitochondrial			Non-effector	0	unaffected_pathogenicity		K	-	-
EXL93853.1	Phosphoribosyl transferase domain		0	NO_SP	0	0	FALSE	FALSE	noTP	Cytoplasm	cyto	Membrane bound Mitochondrial			Non-effector	0			F	GO:0003674,GO:0003824,GO:0003999,GO:0005575,GO:0005576,GO:0005622,GO:0005623,GO:0005634,GO:0005737,GO:0006139,GO:0006144,GO:0006163,GO:0006164,GO:0006167,GO:0006168,GO:0006725,GO:0006753,GO:0006793,GO:0006796,GO:0006807,GO:0008150,GO:0008152,GO:0009058,GO:0009112,GO:0009113,GO:0009117,GO:0009123,GO:0009124,GO:0009126,GO:0009127,GO:0009150,GO:0009152,GO:0009156,GO:0009161,GO:0009165,GO:0009167,GO:…	ko:K00759
EXL93934.1	NAD(P)H-binding		0	NO_SP	0	0	FALSE	FALSE	noTP	Cytoplasm	mito	Mitochondrial			Non-effector	0			G	-	-
EXL93945.1	PPIases accelerate the folding of proteins. It catalyzes the cis-trans isomerization of proline imidic peptide bonds in oligopeptides		0	NO_SP	0	0	FALSE	FALSE	mTP	Mitochondrion	mito	Membrane bound Mitochondrial			Apoplastic effector	0	reduced_virulence		O	GO:0000413,GO:0003674,GO:0003755,GO:0003824,GO:0005575,GO:0005622,GO:0005623,GO:0005737,GO:0005739,GO:0006464,GO:0006807,GO:0008150,GO:0008152,GO:0009987,GO:0016853,GO:0016859,GO:0018193,GO:0018208,GO:0019538,GO:0036211,GO:0043170,GO:0043226,GO:0043227,GO:0043229,GO:0043231,GO:0043412,GO:0044237,GO:0044238,GO:0044260,GO:0044267,GO:0044424,GO:0044444,GO:0044464,GO:0071704,GO:0140096,GO:1901564	ko:K01802
EXL93988.1	Required for the processing of the 20S rRNA-precursor to mature 18S rRNA in a late step of the maturation of 40S ribosomal subunits. Has a physiological role leading to 18S rRNA stability		0	NO_SP	0	0	FALSE	FALSE	noTP	Cytoplasm	cyto_nucl	Cytoplasmic			Cytoplasmic effector	0			J	GO:0000447,GO:0000460,GO:0000461,GO:0000462,GO:0000466,GO:0000469,GO:0000478,GO:0000479,GO:0002181,GO:0002182,GO:0003674,GO:0003735,GO:0005198,GO:0005575,GO:0005622,GO:0005623,GO:0005737,GO:0005829,GO:0005840,GO:0006139,GO:0006364,GO:0006396,GO:0006412,GO:0006414,GO:0006518,GO:0006725,GO:0006807,GO:0008150,GO:0008152,GO:0009058,GO:0009059,GO:0009987,GO:0010467,GO:0015935,GO:0016070,GO:0016072,GO:…	ko:K02971
EXL94004.1	Belongs to the universal ribosomal protein uL14 family		0	NO_SP	0	0	FALSE	FALSE	noTP	Mitochondrion	cyto	Mitochondrial			Cytoplasmic effector	0			J	GO:0002181,GO:0003674,GO:0003676,GO:0003723,GO:0003735,GO:0005198,GO:0005488,GO:0005575,GO:0005622,GO:0005623,GO:0005634,GO:0005737,GO:0005829,GO:0005840,GO:0006412,GO:0006518,GO:0006807,GO:0008150,GO:0008152,GO:0009058,GO:0009059,GO:0009987,GO:0010467,GO:0015934,GO:0019538,GO:0019843,GO:0022625,GO:0022626,GO:0032991,GO:0034641,GO:0034645,GO:0043043,GO:0043170,GO:0043226,GO:0043227,GO:0043228,GO:…	ko:K02894
EXL94101.1	RNA recognition motif		0	NO_SP	0	0	FALSE	FALSE	noTP	Cytoplasm	nucl	Cytoplasmic			Cytoplasmic effector	0			A	GO:0003674,GO:0003676,GO:0003723,GO:0005488,GO:0097159,GO:1901363	-
EXL94104.1	-		0	NO_SP	0	0	FALSE	FALSE	noTP	Nucleus	nucl	Nuclear			Cytoplasmic effector	0			-	-	-
EXL94122.1	The H protein shuttles the methylamine group of glycine from the P protein to the T protein		0	NO_SP	0	0	FALSE	FALSE	mTP	Mitochondrion	mito	Mitochondrial			Non-effector	0			E	GO:0001505,GO:0005575,GO:0005622,GO:0005623,GO:0005737,GO:0005739,GO:0005960,GO:0006082,GO:0006464,GO:0006520,GO:0006544,GO:0006546,GO:0006730,GO:0006807,GO:0008150,GO:0008152,GO:0009056,GO:0009063,GO:0009069,GO:0009071,GO:0009249,GO:0009987,GO:0010467,GO:0016054,GO:0017144,GO:0018065,GO:0018193,GO:0018205,GO:0019464,GO:0019538,GO:0019752,GO:0032991,GO:0036211,GO:0042133,GO:0042135,GO:0042737,GO:…	ko:K02437
EXL94320.1	Pyridoxal-dependent decarboxylase conserved domain	Y	0	NO_SP	0	0	FALSE	FALSE	noTP	Cytoplasm	cyto	Cytoplasmic			Non-effector	0			E	-	ko:K01593
EXL94756.1	Belongs to the glycosyl hydrolase 17 family		0	NO_SP	1	1	FALSE	FALSE	noTP	Cell_membrane	plas	Plasma membrane	Classical_membrane	GH17	Non-effector	0	reduced_virulence		I	GO:0000272,GO:0003674,GO:0003824,GO:0004553,GO:0005575,GO:0005618,GO:0005623,GO:0005975,GO:0005976,GO:0008150,GO:0008152,GO:0008422,GO:0009056,GO:0009057,GO:0009251,GO:0009277,GO:0015926,GO:0016052,GO:0016787,GO:0016798,GO:0030312,GO:0042973,GO:0043170,GO:0044042,GO:0044238,GO:0044464,GO:0071704,GO:0071944,GO:1901575	ko:K01210
EXL94780.1	Belongs to the short-chain dehydrogenases reductases (SDR) family		0	NO_SP	0	0	FALSE	FALSE	mTP	Mitochondrion	mito	Membrane bound Mitochondrial			Non-effector	0	unaffected_pathogenicity		Q	-	-
EXL94797.1	Ribosome-associated complex head domain		0	NO_SP	0	0	FALSE	FALSE	noTP	Nucleus	nucl	Nuclear			Cytoplasmic effector	0	loss_of_pathogenicity		O	GO:0000054,GO:0002181,GO:0002182,GO:0003674,GO:0005488,GO:0005515,GO:0005575,GO:0005622,GO:0005623,GO:0005634,GO:0005730,GO:0005737,GO:0005739,GO:0005840,GO:0005844,GO:0006139,GO:0006364,GO:0006396,GO:0006403,GO:0006405,GO:0006412,GO:0006414,GO:0006450,GO:0006452,GO:0006457,GO:0006458,GO:0006518,GO:0006611,GO:0006725,GO:0006807,GO:0006810,GO:0006886,GO:0006913,GO:0008104,GO:0008150,GO:0008152,GO:…	ko:K01640,ko:K09522
EXL94802.1	Pyruvate dehydrogenase E1 component subunit beta		0	NO_SP	0	0	FALSE	FALSE	mTP	Mitochondrion	mito	Membrane bound Mitochondrial			Non-effector	0	reduced_virulence		C	GO:0003674,GO:0003824,GO:0004738,GO:0004739,GO:0005575,GO:0005622,GO:0005623,GO:0005737,GO:0005739,GO:0005759,GO:0005967,GO:0006082,GO:0006084,GO:0006085,GO:0006086,GO:0006090,GO:0006139,GO:0006163,GO:0006164,GO:0006637,GO:0006725,GO:0006732,GO:0006753,GO:0006790,GO:0006793,GO:0006796,GO:0006807,GO:0008150,GO:0008152,GO:0009058,GO:0009108,GO:0009117,GO:0009150,GO:0009152,GO:0009165,GO:0009259,GO:…	ko:K00162
EXL95115.1	pfkB family carbohydrate kinase		0	NO_SP	0	0	FALSE	FALSE	mTP	Plastid	mito	Membrane bound Mitochondrial			Non-effector	0			G	GO:0003674,GO:0003824,GO:0004001,GO:0005575,GO:0005622,GO:0005623,GO:0005634,GO:0005737,GO:0005829,GO:0006139,GO:0006144,GO:0006163,GO:0006164,GO:0006166,GO:0006167,GO:0006169,GO:0006725,GO:0006753,GO:0006793,GO:0006796,GO:0006807,GO:0008150,GO:0008152,GO:0009058,GO:0009112,GO:0009116,GO:0009117,GO:0009119,GO:0009123,GO:0009124,GO:0009126,GO:0009127,GO:0009150,GO:0009152,GO:0009156,GO:0009161,GO:…	ko:K00856
EXL95119.1	60S ribosomal protein	Y	0	NO_SP	0	0	FALSE	FALSE	noTP	Cytoplasm	mito	Membrane bound Mitochondrial			Non-effector	0	unaffected_pathogenicity		J	GO:0002181,GO:0003674,GO:0003676,GO:0003723,GO:0003735,GO:0005198,GO:0005488,GO:0005575,GO:0005622,GO:0005623,GO:0005737,GO:0005829,GO:0005840,GO:0006412,GO:0006518,GO:0006807,GO:0008150,GO:0008152,GO:0009058,GO:0009059,GO:0009987,GO:0010467,GO:0015934,GO:0019538,GO:0019843,GO:0022625,GO:0022626,GO:0030684,GO:0030687,GO:0032991,GO:0034641,GO:0034645,GO:0043043,GO:0043170,GO:0043226,GO:0043228,GO:…	ko:K02938
EXL95140.1	Belongs to the universal ribosomal protein uL1 family		0	NO_SP	0	0	FALSE	FALSE	noTP	Cytoplasm	nucl	Nuclear			Cytoplasmic effector	0			J	GO:0000470,GO:0002181,GO:0003674,GO:0003676,GO:0003723,GO:0003735,GO:0005198,GO:0005488,GO:0005575,GO:0005622,GO:0005623,GO:0005737,GO:0005829,GO:0005840,GO:0006139,GO:0006364,GO:0006396,GO:0006412,GO:0006518,GO:0006725,GO:0006807,GO:0008150,GO:0008152,GO:0009058,GO:0009059,GO:0009987,GO:0010467,GO:0015934,GO:0016070,GO:0016072,GO:0019538,GO:0022613,GO:0022625,GO:0022626,GO:0030684,GO:0030687,GO:…	ko:K02865
EXL95147.1	Belongs to the SKP1 family	Y	0	NO_SP	0	0	FALSE	FALSE	noTP	Nucleus	nucl	Nuclear			Cytoplasmic effector	0	loss_of_pathogenicity		O	GO:0000018,GO:0000082,GO:0000086,GO:0000151,GO:0000152,GO:0000278,GO:0000280,GO:0000775,GO:0000776,GO:0000921,GO:0003674,GO:0003676,GO:0003677,GO:0003688,GO:0003690,GO:0003824,GO:0004842,GO:0005488,GO:0005515,GO:0005575,GO:0005622,GO:0005623,GO:0005634,GO:0005694,GO:0005737,GO:0006417,GO:0006464,GO:0006508,GO:0006511,GO:0006790,GO:0006807,GO:0006873,GO:0006885,GO:0006996,GO:0006997,GO:0006998,GO:…	ko:K03094
EXL95174.1	Uncharacterised protein family UPF0047		0	NO_SP	1	1	FALSE	FALSE	noTP	Golgi_apparatus	extr	Membrane bound Lysosomal			Non-effector	0			S	-	-
EXL95211.1	Proteasome		0	NO_SP	0	0	FALSE	FALSE	noTP	Cytoplasm	cyto	Membrane bound Mitochondrial			Non-effector	0			O	GO:0000502,GO:0003674,GO:0003824,GO:0004175,GO:0005575,GO:0005622,GO:0005623,GO:0005634,GO:0005737,GO:0005783,GO:0005789,GO:0005829,GO:0005839,GO:0006508,GO:0006511,GO:0006807,GO:0007088,GO:0007346,GO:0008150,GO:0008152,GO:0008233,GO:0009056,GO:0009057,GO:0009896,GO:0009987,GO:0010498,GO:0010499,GO:0010564,GO:0010638,GO:0010965,GO:0012505,GO:0016020,GO:0016043,GO:0016787,GO:0019538,GO:0019774,GO:…	ko:K02737
EXL95258.1	to extracellular cell wall glucanase Crf1 allergen Asp F9		0	NO_SP	0	1	FALSE	FALSE	noTP	Cell_membrane	plas	Membrane bound Extracellular (Secreted)	Classical_membrane	GH16_18	Apoplastic effector	0			O	GO:0000131,GO:0003674,GO:0003824,GO:0005575,GO:0005576,GO:0005618,GO:0005622,GO:0005623,GO:0005886,GO:0005975,GO:0005976,GO:0006022,GO:0006030,GO:0006037,GO:0006040,GO:0006807,GO:0008150,GO:0008152,GO:0009277,GO:0009986,GO:0009987,GO:0010383,GO:0016020,GO:0016043,GO:0016740,GO:0016757,GO:0017144,GO:0030312,GO:0030445,GO:0030446,GO:0031224,GO:0031225,GO:0031226,GO:0031505,GO:0043170,GO:0044036,GO:…	ko:K01216
EXL95301.1	Mitochondrial ATPase inhibitor, IATP		0	NO_SP	0	0	FALSE	FALSE	mTP	Mitochondrion	mito	Mitochondrial			Cytoplasmic effector	0			S	GO:0003674,GO:0004857,GO:0005488,GO:0005515,GO:0005575,GO:0005622,GO:0005623,GO:0005737,GO:0005739,GO:0008150,GO:0019899,GO:0030234,GO:0032780,GO:0042030,GO:0043086,GO:0043226,GO:0043227,GO:0043229,GO:0043231,GO:0043462,GO:0044092,GO:0044424,GO:0044444,GO:0044464,GO:0050790,GO:0051117,GO:0051336,GO:0051346,GO:0060589,GO:0060590,GO:0065007,GO:0065009,GO:0098772	ko:K22255
EXL95304.1	Domain of unknown function (DUF5102)		0	NO_SP	0	0	FALSE	FALSE	noTP	Nucleus	nucl	Nuclear			Cytoplasmic effector	0			S	-	-
EXL95404.1	Aldo/keto reductase family	Y	0	NO_SP	0	0	FALSE	FALSE	mTP	Mitochondrion	cyto	Membrane bound Mitochondrial			Non-effector	0	unaffected_pathogenicity		S	-	ko:K18097,ko:K19634
EXL95414.1	C-terminal four TMM region of protein-O-mannosyltransferase		1	NO_SP	11	12	FALSE	FALSE	noTP	Cell_membrane	plas	Plasma membrane		GT39	Non-effector	0	reduced_virulence		O	GO:0000030,GO:0000032,GO:0003674,GO:0003824,GO:0004169,GO:0005575,GO:0005622,GO:0005623,GO:0005737,GO:0005783,GO:0005789,GO:0005886,GO:0006056,GO:0006057,GO:0006464,GO:0006486,GO:0006493,GO:0006508,GO:0006515,GO:0006807,GO:0006810,GO:0006886,GO:0006950,GO:0007154,GO:0007155,GO:0008104,GO:0008150,GO:0008152,GO:0009056,GO:0009057,GO:0009058,GO:0009059,GO:0009100,GO:0009101,GO:0009267,GO:0009405,GO:…	ko:K00728
EXL95507.1	Ribosomal protein L21e		0	NO_SP	0	0	FALSE	FALSE	noTP	Cytoplasm	mito	Mitochondrial			Cytoplasmic effector	0			J	GO:0002181,GO:0003674,GO:0003735,GO:0005198,GO:0005575,GO:0005622,GO:0005623,GO:0005737,GO:0005829,GO:0005840,GO:0006412,GO:0006518,GO:0006807,GO:0008150,GO:0008152,GO:0009058,GO:0009059,GO:0009987,GO:0010467,GO:0015934,GO:0019538,GO:0022625,GO:0022626,GO:0032991,GO:0034641,GO:0034645,GO:0043043,GO:0043170,GO:0043226,GO:0043228,GO:0043229,GO:0043232,GO:0043603,GO:0043604,GO:0044237,GO:0044238,GO:…	ko:K02889
EXL95530.1	translation initiation factor activity		0	NO_SP	0	0	FALSE	FALSE	noTP	Plastid	nucl	Cytoplasmic			Cytoplasmic effector	0			J	GO:0001666,GO:0001731,GO:0002181,GO:0002183,GO:0003674,GO:0003676,GO:0003723,GO:0003743,GO:0005488,GO:0005515,GO:0005575,GO:0005622,GO:0005623,GO:0005634,GO:0005737,GO:0006412,GO:0006413,GO:0006417,GO:0006446,GO:0006518,GO:0006807,GO:0006950,GO:0007549,GO:0008135,GO:0008150,GO:0008152,GO:0009048,GO:0009058,GO:0009059,GO:0009628,GO:0009889,GO:0009987,GO:0010467,GO:0010468,GO:0010556,GO:0010608,GO:…	ko:K03113,ko:K09228
EXL95640.1	Plays an important role in the de novo pathway and in the salvage pathway of purine nucleotide biosynthesis. Catalyzes the first commited step in the biosynthesis of AMP from IMP	Y	0	NO_SP	0	0	FALSE	FALSE	noTP	Plastid	mito	Membrane bound Mitochondrial			Non-effector	0	reduced_virulence		F	GO:0003674,GO:0003676,GO:0003677,GO:0003688,GO:0003690,GO:0003824,GO:0004019,GO:0005488,GO:0005575,GO:0005622,GO:0005623,GO:0005737,GO:0006082,GO:0006106,GO:0006139,GO:0006163,GO:0006164,GO:0006167,GO:0006725,GO:0006753,GO:0006793,GO:0006796,GO:0006807,GO:0008150,GO:0008152,GO:0009058,GO:0009116,GO:0009117,GO:0009119,GO:0009123,GO:0009124,GO:0009126,GO:0009127,GO:0009150,GO:0009152,GO:0009156,GO:…	ko:K01939
EXL95643.1	Proteasome subunit alpha type		0	NO_SP	0	0	FALSE	FALSE	noTP	Cytoplasm	mito	Cytoplasmic			Non-effector	0			O	GO:0000502,GO:0005575,GO:0005622,GO:0005623,GO:0005634,GO:0005737,GO:0005829,GO:0005839,GO:0006508,GO:0006511,GO:0006807,GO:0007088,GO:0007346,GO:0008150,GO:0008152,GO:0009056,GO:0009057,GO:0009896,GO:0009987,GO:0010498,GO:0010499,GO:0010564,GO:0010638,GO:0010965,GO:0012505,GO:0016020,GO:0016043,GO:0019538,GO:0019773,GO:0019941,GO:0022607,GO:0030071,GO:0030163,GO:0031331,GO:0031597,GO:0032270,GO:…	ko:K02728
EXL95726.1	Binds to actin and affects the structure of the cytoskeleton. At high concentrations, profilin prevents the polymerization of actin, whereas it enhances it at low concentrations		0	NO_SP	0	0	FALSE	FALSE	noTP	Cytoplasm	cyto	Mitochondrial			Cytoplasmic effector	0			Z	GO:0000003,GO:0000278,GO:0000281,GO:0000746,GO:0000747,GO:0000755,GO:0000910,GO:0000912,GO:0000915,GO:0003674,GO:0003779,GO:0003785,GO:0005085,GO:0005488,GO:0005515,GO:0005543,GO:0005546,GO:0005575,GO:0005622,GO:0005623,GO:0005737,GO:0005829,GO:0005856,GO:0005886,GO:0005937,GO:0005938,GO:0006810,GO:0006996,GO:0007010,GO:0007015,GO:0007049,GO:0008064,GO:0008092,GO:0008104,GO:0008150,GO:0008154,GO:…	ko:K05759
EXL95785.1	Gamma interferon inducible lysosomal thiol reductase (GILT)		0	NO_SP	1	1	FALSE	FALSE	noTP	Golgi_apparatus	nucl	Plasma membrane			Non-effector	0			S	-	-
EXL96115.1	Key enzyme for ketone body catabolism. Transfers the CoA moiety from succinate to acetoacetate. Formation of the enzyme-CoA intermediate proceeds via an unstable anhydride species formed between the carboxylate groups of the enzyme and substrate	Y	0	NO_SP	0	0	FALSE	FALSE	mTP	Mitochondrion	mito	Membrane bound Mitochondrial			Non-effector	0			H	-	ko:K01027
EXL96240.1	Beta-lactamase	Y	0	NO_SP	0	0	FALSE	FALSE	SP	Extracellular	extr	Membrane bound Mitochondrial	Non-classical_secreted		Non-effector	0	reduced_virulence		S	-	-
EXL96594.1	Belongs to the histidine acid phosphatase family		0	NO_SP	1	1	FALSE	FALSE	SP	Golgi_apparatus	extr	Membrane bound Endoplasmic reticulum	Classical_membrane		Non-effector	0			S	-	ko:K21403
EXL96702.1	to short-chain		0	NO_SP	0	0	FALSE	FALSE	noTP	Cytoplasm	cyto	Cytoplasmic			Non-effector	0	reduced_virulence		Q	-	-
EXL96709.1	Glutathione S-transferase, N-terminal domain		0	NO_SP	0	0	FALSE	FALSE	mTP	Mitochondrion	mito	Mitochondrial			Cytoplasmic effector	0	unaffected_pathogenicity		O	-	ko:K00799,ko:K03448
EXL97037.1	-		0	NO_SP	1	1	FALSE	FALSE	SP	Golgi_apparatus	extr	Membrane bound Golgi	Classical_membrane		Non-effector	0			-	-	-
EXL97128.1	Involved in biosynthesis of the thiamine precursor thiazole. Catalyzes the conversion of NAD and glycine to adenosine diphosphate 5-(2-hydroxyethyl)-4-methylthiazole-2-carboxylic acid (ADT), an adenylated thiazole intermediate. The reaction includes an iron-dependent sulfide transfer from a conserved cysteine residue of the protein to a thiazole intermediate. The enzyme can only undergo a single …		0	NO_SP	0	0	FALSE	FALSE	noTP	Peroxisome	cyto	Membrane bound Mitochondrial			Non-effector	0			H	GO:0000002,GO:0003674,GO:0005488,GO:0005506,GO:0005575,GO:0005622,GO:0005623,GO:0005737,GO:0005739,GO:0005829,GO:0006725,GO:0006766,GO:0006767,GO:0006772,GO:0006790,GO:0006807,GO:0006996,GO:0007005,GO:0008150,GO:0008152,GO:0008198,GO:0009058,GO:0009110,GO:0009228,GO:0009987,GO:0016043,GO:0017144,GO:0018130,GO:0018131,GO:0019438,GO:0034641,GO:0042364,GO:0042723,GO:0042724,GO:0043167,GO:0043169,GO:…	ko:K03146
EXL97175.1	40S ribosomal protein S19		0	NO_SP	0	0	FALSE	FALSE	noTP	Cytoplasm	cyto	Cytoplasmic			Cytoplasmic effector	0			J	GO:0000028,GO:0002181,GO:0003674,GO:0003735,GO:0005198,GO:0005575,GO:0005622,GO:0005623,GO:0005737,GO:0005829,GO:0005840,GO:0006403,GO:0006405,GO:0006407,GO:0006412,GO:0006518,GO:0006611,GO:0006807,GO:0006810,GO:0006886,GO:0006913,GO:0006996,GO:0008104,GO:0008150,GO:0008152,GO:0009058,GO:0009059,GO:0009987,GO:0010467,GO:0015031,GO:0015833,GO:0015931,GO:0015935,GO:0016043,GO:0019538,GO:0022607,GO:…	ko:K02966
EXL97394.1	Zinc carboxypeptidase		0	NO_SP	0	0	FALSE	FALSE	SP	Endoplasmic_reticulum	extr	Membrane bound Mitochondrial	Non-classical_secreted		Non-effector	0			O	-	-
EXL97477.1	-		0	NO_SP	0	0	FALSE	FALSE	noTP	Plastid	cyto	Extracellular (Secreted)			Apoplastic effector	0			-	-	-
EXL98151.1	Endoribonuclease L-PSP	Y	0	NO_SP	0	0	FALSE	FALSE	noTP	Cytoplasm	cyto	Cytoplasmic			Cytoplasmic effector	0			J	-	-
EXL98262.1	Belongs to the multicopper oxidase family	Y	0	SP	0	0	FALSE	FALSE	SP	Extracellular	extr	Membrane bound Lysosomal	Classical_secreted	AA1_3	Non-effector	0	unaffected_pathogenicity		Q	-	-
EXL98291.1	FAD binding domain	Y	0	NO_SP	1	0	FALSE	FALSE	noTP	Plastid	extr	Membrane bound Mitochondrial			Non-effector	0			CH	-	-
EXL98311.1	Alpha/beta hydrolase family		0	SP	0	0	FALSE	FALSE	SP	Extracellular	extr	Membrane bound Extracellular (Secreted)	Classical_secreted		Non-effector	0			S	-	ko:K06889
EXL98368.1	Component of the ubiquinol-cytochrome c reductase complex (complex III or cytochrome b-c1 complex), which is part of the mitochondrial respiratory chain		0	NO_SP	0	0	FALSE	FALSE	mTP	Mitochondrion	mito	Mitochondrial			Cytoplasmic effector	0			C	GO:0005575,GO:0005622,GO:0005623,GO:0005737,GO:0005739,GO:0005740,GO:0005743,GO:0005746,GO:0005750,GO:0006091,GO:0006119,GO:0006122,GO:0006139,GO:0006163,GO:0006725,GO:0006753,GO:0006793,GO:0006796,GO:0006807,GO:0006996,GO:0007005,GO:0008150,GO:0008152,GO:0009060,GO:0009117,GO:0009123,GO:0009126,GO:0009141,GO:0009144,GO:0009150,GO:0009161,GO:0009167,GO:0009199,GO:0009205,GO:0009259,GO:0009987,GO:…	ko:K00417
EXL98390.1	Low molecular weight phosphatase family		0	NO_SP	0	0	FALSE	FALSE	noTP	Cytoplasm	nucl	Cytoplasmic			Cytoplasmic effector	0	unaffected_pathogenicity		T	GO:0003674,GO:0003824,GO:0004721,GO:0004725,GO:0004726,GO:0005575,GO:0005622,GO:0005623,GO:0005634,GO:0005737,GO:0006464,GO:0006470,GO:0006793,GO:0006796,GO:0006807,GO:0008150,GO:0008152,GO:0009987,GO:0016311,GO:0016787,GO:0016788,GO:0016791,GO:0019538,GO:0023052,GO:0035335,GO:0036211,GO:0042578,GO:0043170,GO:0043226,GO:0043227,GO:0043229,GO:0043231,GO:0043412,GO:0044237,GO:0044238,GO:0044260,GO:…	ko:K14394
EXL98421.1	Arylesterase	Y	0	NO_SP	0	0	FALSE	FALSE	noTP	Cytoplasm	extr	Membrane bound Extracellular (Secreted)	Non-classical_secreted		Non-effector	0	reduced_virulence		G	-	ko:K01053
EXL98452.1	Belongs to the isocitrate and isopropylmalate dehydrogenases family	Y	0	NO_SP	0	0	FALSE	FALSE	mTP	Plastid	mito	Mitochondrial			Non-effector	0			C	GO:0003674,GO:0003824,GO:0004448,GO:0004450,GO:0005575,GO:0005622,GO:0005623,GO:0005737,GO:0005739,GO:0005759,GO:0005777,GO:0005829,GO:0006082,GO:0006091,GO:0006099,GO:0006101,GO:0006102,GO:0006139,GO:0006520,GO:0006536,GO:0006537,GO:0006629,GO:0006631,GO:0006635,GO:0006725,GO:0006732,GO:0006733,GO:0006739,GO:0006740,GO:0006753,GO:0006793,GO:0006796,GO:0006807,GO:0008150,GO:0008152,GO:0008652,GO:…	ko:K00031
EXL98824.1	Wsc domain-containing protein	Y	0	SP	0	0	FALSE	TRUE	SP	Cell_membrane	extr	Membrane bound Extracellular (Secreted)	Classical_membrane		Non-effector	0	reduced_virulence		S	-	-
EXL99133.1	Cytochrome P450		0	NO_SP	1	1	FALSE	FALSE	noTP	Endoplasmic_reticulum	plas	Membrane bound Mitochondrial			Non-effector	0	unaffected_pathogenicity		Q	-	-
EXL99140.1	D-isomer specific 2-hydroxyacid dehydrogenase, NAD binding domain		0	NO_SP	0	0	FALSE	FALSE	mTP	Mitochondrion	mito	Mitochondrial			Non-effector	0	reduced_virulence		C	-	-
EXL99226.1	acid phosphatase precursor	Y	0	NO_SP	0	0	FALSE	TRUE	noTP	Cell_membrane	extr	Extracellular (Secreted)	Classical_membrane		Apoplastic effector	0			G	-	ko:K01078,ko:K22390
EXL99475.1	Phophatidylserine decarboxylase		0	NO_SP	0	0	FALSE	FALSE	noTP	Cytoplasm	plas	Cytoplasmic			Non-effector	0			I	-	ko:K01613
EXL99794.1	beta-glucosidase	Y	0	SP	0	0	FALSE	FALSE	noTP	Plastid	cyto	Membrane bound Mitochondrial		GH3	Non-effector	0	unaffected_pathogenicity		G	-	-
EXL99798.1	-		0	NO_SP	0	0	FALSE	FALSE	noTP	Cytoplasm	cyto	Membrane bound Extracellular (Secreted)			Non-effector	0			-	-	-
EXL99853.1	Catalyzes the interconversion of methylthioribose-1- phosphate (MTR-1-P) into methylthioribulose-1-phosphate (MTRu-1- P)		0	NO_SP	0	0	FALSE	FALSE	noTP	Cytoplasm	mito	Membrane bound Mitochondrial			Non-effector	0			J	GO:0000096,GO:0000097,GO:0003674,GO:0003824,GO:0005575,GO:0005622,GO:0005623,GO:0005634,GO:0005737,GO:0006082,GO:0006520,GO:0006555,GO:0006790,GO:0006807,GO:0008150,GO:0008152,GO:0008652,GO:0009058,GO:0009066,GO:0009067,GO:0009086,GO:0009987,GO:0016053,GO:0016853,GO:0016860,GO:0016861,GO:0017144,GO:0019509,GO:0019752,GO:0043094,GO:0043102,GO:0043226,GO:0043227,GO:0043229,GO:0043231,GO:0043436,GO:…	ko:K08963
EXL99875.1	Lactonase, 7-bladed beta-propeller	Y	0	NO_SP	1	2	FALSE	FALSE	noTP	Golgi_apparatus	extr	Membrane bound Lysosomal			Non-effector	0	reduced_virulence		G	GO:0003674,GO:0003824,GO:0016787,GO:0016788,GO:0017057,GO:0052689	-
EXM00135.1	RNA pol II accessory factor, Cdc73 family, C-terminal		0	NO_SP	0	0	FALSE	FALSE	noTP	Cytoplasm	cyto	Membrane bound Peroxisomal			Non-effector	0			K	GO:0000018,GO:0000414,GO:0000416,GO:0000428,GO:0000785,GO:0000988,GO:0000989,GO:0000993,GO:0001076,GO:0001098,GO:0001099,GO:0001932,GO:0001934,GO:0003674,GO:0003682,GO:0005488,GO:0005515,GO:0005575,GO:0005622,GO:0005623,GO:0005634,GO:0005654,GO:0005694,GO:0006139,GO:0006282,GO:0006325,GO:0006351,GO:0006354,GO:0006355,GO:0006356,GO:0006357,GO:0006360,GO:0006362,GO:0006366,GO:0006368,GO:0006396,GO:…	ko:K15175
EXM00184.1	Component of the ubiquinol-cytochrome c reductase complex (complex III or cytochrome b-c1 complex), which is a respiratory chain that generates an electrochemical potential coupled to ATP synthesis		0	NO_SP	0	0	FALSE	FALSE	mTP	Mitochondrion	mito	Membrane bound Mitochondrial			Non-effector	0			C	GO:0005575,GO:0005622,GO:0005623,GO:0005737,GO:0005739,GO:0005740,GO:0005743,GO:0005746,GO:0005750,GO:0006091,GO:0006119,GO:0006122,GO:0006139,GO:0006163,GO:0006725,GO:0006753,GO:0006793,GO:0006796,GO:0006807,GO:0008150,GO:0008152,GO:0009060,GO:0009117,GO:0009123,GO:0009126,GO:0009141,GO:0009144,GO:0009150,GO:0009161,GO:0009167,GO:0009199,GO:0009205,GO:0009259,GO:0009987,GO:0015980,GO:0016020,GO:…	ko:K00411
EXM00241.1	RHO protein GDP dissociation inhibitor		0	NO_SP	0	0	FALSE	FALSE	noTP	Cytoplasm	nucl	Nuclear			Cytoplasmic effector	0			T	GO:0003674,GO:0005092,GO:0005094,GO:0005575,GO:0005622,GO:0005623,GO:0005737,GO:0005829,GO:0005886,GO:0005933,GO:0005934,GO:0005935,GO:0006996,GO:0007010,GO:0007015,GO:0007154,GO:0007165,GO:0007264,GO:0008150,GO:0009987,GO:0016020,GO:0016043,GO:0023052,GO:0030029,GO:0030036,GO:0030234,GO:0030427,GO:0030695,GO:0032889,GO:0033043,GO:0035556,GO:0044088,GO:0044424,GO:0044444,GO:0044464,GO:0050789,GO:…	ko:K12462
EXM00308.1	FKBP-type peptidyl-prolyl cis-trans isomerase		0	NO_SP	0	0	FALSE	FALSE	mTP	Mitochondrion	mito	Membrane bound Mitochondrial			Apoplastic/cytoplasmic effector	0	reduced_virulence__unaffected_pathogenicity__increased_virulence_(hypervirulence)		O	GO:0000413,GO:0003674,GO:0003755,GO:0003824,GO:0005488,GO:0005527,GO:0005528,GO:0005575,GO:0005622,GO:0005623,GO:0005634,GO:0005737,GO:0005829,GO:0006457,GO:0006464,GO:0006807,GO:0007154,GO:0007165,GO:0008144,GO:0008150,GO:0008152,GO:0009987,GO:0016853,GO:0016859,GO:0018193,GO:0018208,GO:0019538,GO:0023052,GO:0031929,GO:0035556,GO:0036211,GO:0043170,GO:0043226,GO:0043227,GO:0043229,GO:0043231,GO:…	ko:K09568
EXM00395.1	Aspartate aminotransferase		0	NO_SP	0	0	FALSE	FALSE	noTP	Plastid	mito	Membrane bound Mitochondrial			Non-effector	0	reduced_virulence		E	GO:0003674,GO:0003824,GO:0004069,GO:0006082,GO:0006103,GO:0006520,GO:0006531,GO:0006532,GO:0006536,GO:0006807,GO:0008150,GO:0008152,GO:0008483,GO:0008652,GO:0009058,GO:0009064,GO:0009066,GO:0009067,GO:0009987,GO:0016053,GO:0016740,GO:0016769,GO:0019752,GO:0043436,GO:0043648,GO:0043650,GO:0044237,GO:0044238,GO:0044249,GO:0044281,GO:0044283,GO:0046394,GO:0051186,GO:0071704,GO:1901564,GO:1901566,GO:…	ko:K14454
EXM00439.1	WSC domain		0	NO_SP	0	1	FALSE	TRUE	noTP	Cell_membrane	extr	Membrane bound Extracellular (Secreted)	Classical_membrane	GH16_1	Non-effector	0	reduced_virulence		S	-	-
EXM00579.1	Domain of unknown function (DUF1993)		0	NO_SP	0	0	FALSE	FALSE	noTP	Cytoplasm	cyto	Cytoplasmic			Cytoplasmic effector	0			S	-	ko:K09983
EXM00692.1	to stomatin		0	NO_SP	0	0	FALSE	FALSE	noTP	Cytoplasm	cyto	Cytoplasmic			Non-effector	0			C	-	-
EXM00713.1	Aminotransferase class-V	Y	0	NO_SP	0	0	FALSE	FALSE	noTP	Peroxisome	cyto	Membrane bound Mitochondrial			Non-effector	0			E	GO:0001505,GO:0003674,GO:0003824,GO:0004760,GO:0005575,GO:0005622,GO:0005623,GO:0005737,GO:0005739,GO:0005777,GO:0005829,GO:0006082,GO:0006520,GO:0006544,GO:0006545,GO:0006807,GO:0008150,GO:0008152,GO:0008453,GO:0008483,GO:0008652,GO:0009058,GO:0009069,GO:0009070,GO:0009987,GO:0016053,GO:0016740,GO:0016769,GO:0017144,GO:0019265,GO:0019752,GO:0042133,GO:0042136,GO:0042579,GO:0043226,GO:0043227,GO:…	ko:K00830
EXM00970.1	Belongs to the AAA ATPase family		0	NO_SP	0	0	FALSE	FALSE	noTP	Cytoplasm	nucl	Nuclear			Non-effector	0	lethal		O	GO:0000228,GO:0000502,GO:0000785,GO:0000790,GO:0003674,GO:0003824,GO:0005488,GO:0005515,GO:0005575,GO:0005622,GO:0005623,GO:0005634,GO:0005694,GO:0005737,GO:0005829,GO:0005838,GO:0006325,GO:0006355,GO:0006357,GO:0006508,GO:0006511,GO:0006807,GO:0006950,GO:0006996,GO:0007088,GO:0007346,GO:0008134,GO:0008150,GO:0008152,GO:0008540,GO:0009056,GO:0009057,GO:0009889,GO:0009891,GO:0009893,GO:0009894,GO:…	ko:K03063
EXM01018.1	Aspartate aminotransferase		0	NO_SP	0	0	FALSE	FALSE	mTP	Mitochondrion	mito	Membrane bound Mitochondrial			Non-effector	0	reduced_virulence		E	GO:0000096,GO:0001300,GO:0001302,GO:0003674,GO:0003824,GO:0004069,GO:0005575,GO:0005622,GO:0005623,GO:0005737,GO:0005739,GO:0005759,GO:0006082,GO:0006103,GO:0006107,GO:0006520,GO:0006528,GO:0006529,GO:0006530,GO:0006531,GO:0006532,GO:0006533,GO:0006534,GO:0006536,GO:0006538,GO:0006790,GO:0006807,GO:0007568,GO:0007569,GO:0008150,GO:0008152,GO:0008483,GO:0008652,GO:0009056,GO:0009058,GO:0009063,GO:…	ko:K14455
EXM01026.1	Coproporphyrinogen III oxidase		0	NO_SP	1	1	FALSE	FALSE	mTP	Mitochondrion	mito	Membrane bound Golgi			Non-effector	0			H	GO:0003674,GO:0003824,GO:0004109,GO:0005488,GO:0005515,GO:0005575,GO:0005622,GO:0005623,GO:0005737,GO:0005829,GO:0006725,GO:0006778,GO:0006779,GO:0006783,GO:0006807,GO:0008150,GO:0008152,GO:0009058,GO:0009987,GO:0016491,GO:0016627,GO:0016634,GO:0018130,GO:0019438,GO:0033013,GO:0033014,GO:0034641,GO:0042168,GO:0042440,GO:0042802,GO:0042803,GO:0044237,GO:0044249,GO:0044271,GO:0044424,GO:0044444,GO:…	ko:K00228
EXM01035.1	Belongs to the universal ribosomal protein uS12 family		0	NO_SP	0	0	FALSE	FALSE	noTP	Cytoplasm	mito	Cytoplasmic			Cytoplasmic effector	0	unaffected_pathogenicity		J	GO:0000462,GO:0001666,GO:0002181,GO:0003674,GO:0003735,GO:0005198,GO:0005575,GO:0005622,GO:0005623,GO:0005737,GO:0005829,GO:0005840,GO:0006139,GO:0006355,GO:0006357,GO:0006364,GO:0006396,GO:0006412,GO:0006450,GO:0006518,GO:0006606,GO:0006725,GO:0006807,GO:0006810,GO:0006886,GO:0006913,GO:0006950,GO:0008104,GO:0008150,GO:0008152,GO:0009058,GO:0009059,GO:0009628,GO:0009889,GO:0009891,GO:0009893,GO:…	ko:K02973
EXM01156.1	Ribonucleoside-diphosphate reductase small chain		0	NO_SP	1	1	FALSE	FALSE	noTP	Cytoplasm	nucl	Cytoplasmic			Cytoplasmic effector	0			F	GO:0003674,GO:0003824,GO:0004748,GO:0005575,GO:0005622,GO:0005623,GO:0005634,GO:0005737,GO:0005829,GO:0005971,GO:0006139,GO:0006213,GO:0006220,GO:0006221,GO:0006240,GO:0006725,GO:0006753,GO:0006793,GO:0006796,GO:0006807,GO:0008150,GO:0008152,GO:0009058,GO:0009116,GO:0009117,GO:0009119,GO:0009132,GO:0009133,GO:0009138,GO:0009139,GO:0009141,GO:0009142,GO:0009144,GO:0009145,GO:0009147,GO:0009148,GO:…	ko:K10808
EXM01270.1	to endo alpha-1,4 polygalactosaminidase		0	NO_SP	1	1	FALSE	FALSE	noTP	Golgi_apparatus	cyto	Membrane bound Mitochondrial		GH114	Cytoplasmic effector	0			S	-	-
EXM01388.1	Myo-inositol-1-phosphate synthase		0	NO_SP	0	0	FALSE	FALSE	noTP	Cytoplasm	cyto	Cytoplasmic			Non-effector	0			I	GO:0003674,GO:0003824,GO:0004512,GO:0005575,GO:0005618,GO:0005622,GO:0005623,GO:0005737,GO:0005975,GO:0006020,GO:0006021,GO:0006066,GO:0008150,GO:0008152,GO:0009058,GO:0009277,GO:0009986,GO:0009987,GO:0016051,GO:0016853,GO:0016872,GO:0019751,GO:0030312,GO:0030446,GO:0034637,GO:0044237,GO:0044238,GO:0044249,GO:0044262,GO:0044281,GO:0044283,GO:0044424,GO:0044464,GO:0046165,GO:0046173,GO:0071704,GO:…	ko:K01858
EXM01609.1	RNase P subunit Pop3		0	NO_SP	0	0	FALSE	FALSE	noTP	Cytoplasm	nucl	Cytoplasmic			Cytoplasmic effector	0			AJ	GO:0000375,GO:0000377,GO:0000398,GO:0000462,GO:0000470,GO:0003674,GO:0003676,GO:0003723,GO:0005488,GO:0005575,GO:0005622,GO:0005623,GO:0005634,GO:0005681,GO:0005730,GO:0005732,GO:0006139,GO:0006364,GO:0006396,GO:0006397,GO:0006725,GO:0006807,GO:0008150,GO:0008152,GO:0008380,GO:0009987,GO:0010467,GO:0016070,GO:0016071,GO:0016072,GO:0017069,GO:0022613,GO:0030490,GO:0030515,GO:0030532,GO:0030621,GO:…	ko:K12845
EXM01628.1	-		0	NO_SP	0	0	FALSE	FALSE	noTP	Cytoplasm	cyto_nucl	Nuclear			Cytoplasmic effector	0			-	-	-
EXM01663.1	ribosomal protein L22		0	NO_SP	0	0	FALSE	FALSE	noTP	Cytoplasm	nucl	Endoplasmic reticulum			Cytoplasmic effector	0			J	GO:0002181,GO:0003674,GO:0003676,GO:0003723,GO:0003735,GO:0005198,GO:0005488,GO:0005575,GO:0005622,GO:0005623,GO:0005737,GO:0005829,GO:0005840,GO:0006412,GO:0006518,GO:0006807,GO:0008150,GO:0008152,GO:0009058,GO:0009059,GO:0009987,GO:0010467,GO:0015934,GO:0019538,GO:0022625,GO:0022626,GO:0032991,GO:0034641,GO:0034645,GO:0043043,GO:0043170,GO:0043226,GO:0043228,GO:0043229,GO:0043232,GO:0043603,GO:…	ko:K02891
EXM01721.1	ketol-acid reductoisomerase		0	NO_SP	0	0	FALSE	FALSE	mTP	Mitochondrion	mito	Membrane bound Mitochondrial			Non-effector	0	reduced_virulence		E	GO:0000002,GO:0003674,GO:0003676,GO:0003677,GO:0003690,GO:0003824,GO:0004455,GO:0005488,GO:0005575,GO:0005622,GO:0005623,GO:0005737,GO:0005739,GO:0005759,GO:0006082,GO:0006520,GO:0006549,GO:0006551,GO:0006573,GO:0006807,GO:0006996,GO:0007005,GO:0008150,GO:0008152,GO:0008652,GO:0009058,GO:0009081,GO:0009082,GO:0009097,GO:0009099,GO:0009295,GO:0009987,GO:0016043,GO:0016053,GO:0016491,GO:0016614,GO:…	ko:K00053
EXM01746.1	-	Y	0	SP	0	0	FALSE	TRUE	SP	Cell_membrane	extr	Extracellular (Secreted)	Classical_membrane		Non-effector	0	unaffected_pathogenicity		-	-	-
EXM01831.1	Multiprotein-bridging factor 1		0	NO_SP	0	0	FALSE	FALSE	noTP	Cytoplasm	cyto	Nuclear			Cytoplasmic effector	0	reduced_virulence		K	-	ko:K03627
EXM01850.1	Belongs to the peptidase M1 family		0	NO_SP	0	0	FALSE	FALSE	mTP	Mitochondrion	mito	Membrane bound Mitochondrial			Non-effector	0	increased_virulence_(hypervirulence)		EIOV	GO:0000322,GO:0000323,GO:0000324,GO:0000328,GO:0003674,GO:0003824,GO:0004177,GO:0004301,GO:0005488,GO:0005575,GO:0005622,GO:0005623,GO:0005634,GO:0005737,GO:0005768,GO:0005770,GO:0005771,GO:0005773,GO:0005775,GO:0006508,GO:0006518,GO:0006629,GO:0006807,GO:0008104,GO:0008150,GO:0008152,GO:0008233,GO:0008235,GO:0008237,GO:0008238,GO:0008270,GO:0009056,GO:0009057,GO:0009987,GO:0012505,GO:0016787,GO:…	ko:K01254
EXM01944.1	Belongs to the spermidine spermine synthase family		0	NO_SP	0	0	FALSE	FALSE	noTP	Mitochondrion	mito	Cytoplasmic			Non-effector	0	reduced_virulence		H	GO:0003674,GO:0003824,GO:0004766,GO:0005575,GO:0005622,GO:0005623,GO:0005634,GO:0005737,GO:0006082,GO:0006575,GO:0006576,GO:0006595,GO:0006596,GO:0006732,GO:0006766,GO:0006767,GO:0006807,GO:0008150,GO:0008152,GO:0008216,GO:0008295,GO:0009058,GO:0009108,GO:0009110,GO:0009308,GO:0009309,GO:0009987,GO:0015939,GO:0015940,GO:0016053,GO:0016740,GO:0016765,GO:0019752,GO:0032787,GO:0034641,GO:0042364,GO:…	ko:K00797
EXM01950.1	Carbon-nitrogen hydrolase		0	NO_SP	0	0	FALSE	FALSE	mTP	Mitochondrion	mito	Membrane bound Mitochondrial			Non-effector	0			E	GO:0003674,GO:0003824,GO:0005575,GO:0005622,GO:0005623,GO:0005737,GO:0005739,GO:0006082,GO:0006107,GO:0008150,GO:0008152,GO:0009636,GO:0009987,GO:0016787,GO:0016810,GO:0016811,GO:0019752,GO:0042221,GO:0043226,GO:0043227,GO:0043229,GO:0043231,GO:0043436,GO:0043648,GO:0044237,GO:0044281,GO:0044424,GO:0044444,GO:0044464,GO:0050152,GO:0050896,GO:0051716,GO:0070887,GO:0071704,GO:0097237,GO:0098754,GO:…	ko:K13566
EXM01954.1	60s ribosomal protein		0	NO_SP	0	0	FALSE	FALSE	noTP	Cytoplasm	nucl	Cytoplasmic			Cytoplasmic effector	0			J	GO:0000027,GO:0002181,GO:0003674,GO:0003676,GO:0003723,GO:0003735,GO:0005198,GO:0005488,GO:0005575,GO:0005622,GO:0005623,GO:0005737,GO:0005829,GO:0005840,GO:0006412,GO:0006415,GO:0006518,GO:0006807,GO:0006996,GO:0008150,GO:0008152,GO:0009058,GO:0009059,GO:0009987,GO:0010467,GO:0015934,GO:0016043,GO:0019538,GO:0022411,GO:0022607,GO:0022613,GO:0022618,GO:0022625,GO:0022626,GO:0032984,GO:0032991,GO:…	ko:K02866
EXM02036.1	to fructose-bisphosphate aldolase	Y	0	NO_SP	0	0	FALSE	FALSE	noTP	Cytoplasm	cyto	Cytoplasmic			Non-effector	0	reduced_virulence		G	-	ko:K01624
EXM02052.1	Four repeated domains in the Fasciclin I family of proteins, present in many other contexts.		0	SP	0	1	FALSE	TRUE	SP	Extracellular	extr	Membrane bound Extracellular (Secreted)	Classical_membrane		Non-effector	0	reduced_virulence		T	-	-
EXM02112.1	Belongs to the universal ribosomal protein uL13 family		0	NO_SP	0	0	FALSE	FALSE	noTP	Cytoplasm	cyto	Cytoplasmic			Cytoplasmic effector	0			J	GO:0002181,GO:0003674,GO:0003676,GO:0003723,GO:0003729,GO:0003735,GO:0005198,GO:0005488,GO:0005575,GO:0005622,GO:0005623,GO:0005737,GO:0005829,GO:0005840,GO:0006412,GO:0006518,GO:0006807,GO:0008150,GO:0008152,GO:0009058,GO:0009059,GO:0009987,GO:0010467,GO:0015934,GO:0019538,GO:0022625,GO:0022626,GO:0032991,GO:0034641,GO:0034645,GO:0043043,GO:0043170,GO:0043226,GO:0043228,GO:0043229,GO:0043232,GO:…	ko:K02872
EXM02160.1	Cytoplasmic phospholipase A2, catalytic subunit		0	NO_SP	0	1	FALSE	TRUE	noTP	Cell_membrane	cyto	Membrane bound Golgi			Non-effector	0	unaffected_pathogenicity		G	GO:0000003,GO:0000322,GO:0000323,GO:0000324,GO:0000746,GO:0000747,GO:0003674,GO:0003824,GO:0004620,GO:0004622,GO:0005575,GO:0005576,GO:0005618,GO:0005622,GO:0005623,GO:0005737,GO:0005773,GO:0005783,GO:0005886,GO:0006575,GO:0006629,GO:0006644,GO:0006650,GO:0006658,GO:0006660,GO:0006793,GO:0006796,GO:0006807,GO:0006950,GO:0006970,GO:0008150,GO:0008152,GO:0009056,GO:0009277,GO:0009395,GO:0009405,GO:…	ko:K13333
EXM02246.1	-		0	NO_SP	0	0	FALSE	FALSE	noTP	Cytoplasm	nucl	Cytoplasmic			Cytoplasmic effector	0			-	-	-
EXM02393.1	Nitroreductase family		0	NO_SP	0	0	FALSE	FALSE	noTP	Mitochondrion	mito	Membrane bound Mitochondrial			Non-effector	0			S	GO:0003674,GO:0003824,GO:0005575,GO:0005622,GO:0005623,GO:0005634,GO:0005737,GO:0006950,GO:0006979,GO:0008150,GO:0008152,GO:0009892,GO:0009987,GO:0010565,GO:0016491,GO:0016651,GO:0016657,GO:0019216,GO:0019217,GO:0019222,GO:0031323,GO:0031324,GO:0033554,GO:0034599,GO:0042221,GO:0043226,GO:0043227,GO:0043229,GO:0043231,GO:0044424,GO:0044464,GO:0045833,GO:0045922,GO:0048519,GO:0048523,GO:0050789,GO:…	ko:K07078
EXM02406.1	Belongs to the universal ribosomal protein uL22 family		0	NO_SP	0	0	FALSE	FALSE	noTP	Cytoplasm	mito	Mitochondrial			Cytoplasmic effector	0			J	GO:0000448,GO:0000460,GO:0000463,GO:0000466,GO:0000469,GO:0000470,GO:0000478,GO:0000479,GO:0002181,GO:0003674,GO:0003735,GO:0005198,GO:0005575,GO:0005622,GO:0005623,GO:0005737,GO:0005829,GO:0005840,GO:0006139,GO:0006364,GO:0006396,GO:0006412,GO:0006518,GO:0006725,GO:0006807,GO:0008150,GO:0008152,GO:0009058,GO:0009059,GO:0009987,GO:0010467,GO:0015934,GO:0016070,GO:0016072,GO:0019538,GO:0022613,GO:…	ko:K02880
EXM02436.1	Ca2+ insensitive EF hand		0	NO_SP	0	0	FALSE	FALSE	noTP	Plastid	nucl	Nuclear			Cytoplasmic effector	0	reduced_virulence__loss_of_pathogenicity		T	GO:0000003,GO:0000131,GO:0000226,GO:0000741,GO:0000742,GO:0000746,GO:0000747,GO:0001411,GO:0003674,GO:0005488,GO:0005509,GO:0005515,GO:0005575,GO:0005622,GO:0005623,GO:0005737,GO:0005815,GO:0005816,GO:0005823,GO:0005856,GO:0005933,GO:0005934,GO:0005935,GO:0005937,GO:0006606,GO:0006607,GO:0006629,GO:0006644,GO:0006650,GO:0006661,GO:0006793,GO:0006796,GO:0006810,GO:0006886,GO:0006897,GO:0006898,GO:…	ko:K02183
EXM02485.1	Belongs to the universal ribosomal protein uL11 family		0	NO_SP	0	0	FALSE	FALSE	noTP	Cytoplasm	cyto	Cytoplasmic			Cytoplasmic effector	0			J	GO:0000027,GO:0002181,GO:0003674,GO:0003676,GO:0003723,GO:0003735,GO:0005198,GO:0005488,GO:0005575,GO:0005622,GO:0005623,GO:0005737,GO:0005829,GO:0005840,GO:0006412,GO:0006518,GO:0006807,GO:0006996,GO:0008150,GO:0008152,GO:0009058,GO:0009059,GO:0009987,GO:0010467,GO:0015934,GO:0016043,GO:0019538,GO:0019843,GO:0022607,GO:0022613,GO:0022618,GO:0022625,GO:0022626,GO:0030684,GO:0030687,GO:0032991,GO:…	ko:K02870
EXM02530.1	BAR domain protein	Y	0	NO_SP	0	0	FALSE	FALSE	noTP	Cytoplasm	nucl	Nuclear			Cytoplasmic effector	0			S	GO:0000139,GO:0005575,GO:0005622,GO:0005623,GO:0005737,GO:0005794,GO:0005829,GO:0006810,GO:0006897,GO:0006996,GO:0007010,GO:0007033,GO:0007163,GO:0008150,GO:0009987,GO:0012505,GO:0016020,GO:0016021,GO:0016043,GO:0016192,GO:0030029,GO:0030036,GO:0030173,GO:0030950,GO:0030952,GO:0031090,GO:0031224,GO:0031228,GO:0031300,GO:0031301,GO:0031984,GO:0043226,GO:0043227,GO:0043229,GO:0043231,GO:0044422,GO:…	-
EXM02601.1	Glycolipid transfer protein (GLTP)		0	NO_SP	0	0	FALSE	FALSE	noTP	Plastid	cyto_mito	Cytoplasmic			Non-effector	0	reduced_virulence		G	-	-
EXM02655.1	D-isomer specific 2-hydroxyacid dehydrogenase, NAD binding domain	Y	0	NO_SP	0	0	FALSE	FALSE	noTP	Mitochondrion	mito	Membrane bound Mitochondrial			Cytoplasmic effector	0	reduced_virulence		C	-	-
EXM02718.1	Belongs to the universal ribosomal protein uL15 family		0	NO_SP	0	0	FALSE	FALSE	noTP	Nucleus	mito	Mitochondrial			Cytoplasmic effector	0			J	GO:0002181,GO:0003674,GO:0003676,GO:0003723,GO:0003735,GO:0005198,GO:0005488,GO:0005575,GO:0005622,GO:0005623,GO:0005634,GO:0005737,GO:0005829,GO:0005840,GO:0006412,GO:0006518,GO:0006807,GO:0008150,GO:0008152,GO:0009058,GO:0009059,GO:0009987,GO:0010467,GO:0015934,GO:0019538,GO:0022625,GO:0022626,GO:0030684,GO:0030687,GO:0032991,GO:0034641,GO:0034645,GO:0043043,GO:0043170,GO:0043226,GO:0043227,GO:…	ko:K02900,ko:K11273
EXM02864.1	RNA recognition motif		0	NO_SP	0	0	FALSE	FALSE	noTP	Cytoplasm	cyto_nucl	Nuclear			Cytoplasmic effector	0	lethal		A	GO:0000228,GO:0000723,GO:0000781,GO:0000784,GO:0003674,GO:0003676,GO:0003677,GO:0003697,GO:0003723,GO:0005488,GO:0005575,GO:0005622,GO:0005623,GO:0005634,GO:0005694,GO:0006139,GO:0006259,GO:0006725,GO:0006807,GO:0006996,GO:0008150,GO:0008152,GO:0009987,GO:0016043,GO:0031974,GO:0031981,GO:0032200,GO:0034641,GO:0042162,GO:0042592,GO:0043047,GO:0043170,GO:0043226,GO:0043227,GO:0043228,GO:0043229,GO:…	-
EXM02913.1	Inositol monophosphatase family		0	NO_SP	1	0	FALSE	FALSE	SP	Endoplasmic_reticulum	extr	Membrane bound Mitochondrial	Classical_membrane		Non-effector	0	reduced_virulence		FP	GO:0000096,GO:0000097,GO:0000103,GO:0003674,GO:0003824,GO:0004441,GO:0006082,GO:0006520,GO:0006555,GO:0006790,GO:0006793,GO:0006796,GO:0006807,GO:0006950,GO:0006970,GO:0006972,GO:0007154,GO:0007165,GO:0008150,GO:0008152,GO:0008252,GO:0008441,GO:0008652,GO:0009058,GO:0009066,GO:0009067,GO:0009086,GO:0009628,GO:0009651,GO:0009987,GO:0016053,GO:0016311,GO:0016312,GO:0016787,GO:0016788,GO:0016791,GO:…	ko:K01082
EXM02993.1	Ubiquinol-cytochrome C reductase hinge protein	Y	0	NO_SP	0	0	FALSE	FALSE	noTP	Mitochondrion	nucl	Mitochondrial			Cytoplasmic effector	0			C	GO:0005575,GO:0005622,GO:0005623,GO:0005634,GO:0005737,GO:0005739,GO:0005740,GO:0005743,GO:0005746,GO:0005750,GO:0005758,GO:0006091,GO:0006119,GO:0006122,GO:0006139,GO:0006163,GO:0006725,GO:0006753,GO:0006793,GO:0006796,GO:0006807,GO:0008150,GO:0008152,GO:0009060,GO:0009117,GO:0009123,GO:0009126,GO:0009141,GO:0009144,GO:0009150,GO:0009161,GO:0009167,GO:0009199,GO:0009205,GO:0009259,GO:0009987,GO:…	ko:K00416
EXM03002.1	Glyoxalase-like domain		0	NO_SP	0	0	FALSE	FALSE	mTP	Mitochondrion	mito	Mitochondrial			Cytoplasmic effector	0	unaffected_pathogenicity		G	GO:0003674,GO:0003824,GO:0004462,GO:0005488,GO:0005575,GO:0005622,GO:0005623,GO:0005634,GO:0005737,GO:0006081,GO:0006082,GO:0006089,GO:0006518,GO:0006575,GO:0006749,GO:0006790,GO:0006807,GO:0006950,GO:0006970,GO:0008150,GO:0008152,GO:0008270,GO:0009056,GO:0009438,GO:0009628,GO:0009636,GO:0009987,GO:0016829,GO:0016846,GO:0019243,GO:0019752,GO:0032787,GO:0033554,GO:0034641,GO:0042180,GO:0042182,GO:…	ko:K01759
EXM03042.1	to importin beta-1 subunit		0	NO_SP	0	0	FALSE	FALSE	noTP	Cytoplasm	cyto	Cytoplasmic			Non-effector	0			UY	GO:0000060,GO:0000166,GO:0001882,GO:0001883,GO:0003674,GO:0005048,GO:0005085,GO:0005087,GO:0005088,GO:0005215,GO:0005488,GO:0005515,GO:0005525,GO:0005575,GO:0005622,GO:0005623,GO:0005634,GO:0005635,GO:0005643,GO:0005737,GO:0005819,GO:0005856,GO:0006605,GO:0006606,GO:0006607,GO:0006610,GO:0006612,GO:0006629,GO:0006644,GO:0006650,GO:0006656,GO:0006793,GO:0006796,GO:0006807,GO:0006810,GO:0006886,GO:…	ko:K14293
EXM03045.1	Aminotransferase class I and II	Y	0	NO_SP	0	0	FALSE	FALSE	noTP	Mitochondrion	cysk	Cytoplasmic			Non-effector	0	reduced_virulence		E	-	-
EXM03303.1	-		0	NO_SP	1	1	FALSE	FALSE	noTP	Cell_membrane	plas	Plasma membrane	Classical_membrane		Non-effector	0			-	-	-
EXM03518.1	Alpha/beta hydrolase family	Y	0	SP	0	0	FALSE	FALSE	SP	Extracellular	extr	Membrane bound Lysosomal	Classical_secreted		Non-effector	0			S	-	-
EXM03582.1	-		0	NO_SP	0	0	FALSE	TRUE	noTP	Plastid	extr	Membrane bound Extracellular (Secreted)	Classical_membrane		Apoplastic effector	0			-	-	-
EXM03586.1	Cofilin/tropomyosin-type actin-binding protein		0	NO_SP	0	0	FALSE	FALSE	noTP	Cytoplasm	cyto	Cytoplasmic			Cytoplasmic effector	0	reduced_virulence		Z	-	-
EXM03732.1	-		0	NO_SP	0	0	FALSE	FALSE	noTP	Nucleus	nucl	Nuclear			Cytoplasmic effector	0			-	-	-
EXM03737.1	Belongs to the eukaryotic ribosomal protein eS7 family		0	NO_SP	0	0	FALSE	FALSE	noTP	Nucleus	nucl	Membrane bound Mitochondrial			Cytoplasmic effector	0			J	GO:0002181,GO:0003674,GO:0003735,GO:0005198,GO:0005575,GO:0005622,GO:0005623,GO:0005737,GO:0005829,GO:0005840,GO:0006139,GO:0006364,GO:0006396,GO:0006412,GO:0006518,GO:0006725,GO:0006807,GO:0008150,GO:0008152,GO:0009058,GO:0009059,GO:0009987,GO:0010467,GO:0015935,GO:0016070,GO:0016072,GO:0019538,GO:0022613,GO:0022626,GO:0022627,GO:0030684,GO:0030686,GO:0032040,GO:0032991,GO:0034470,GO:0034641,GO:…	ko:K02993
EXM03761.1	Belongs to the glycosyl hydrolase 3 family		0	NO_SP	0	0	FALSE	FALSE	noTP	Cytoplasm	cyto	Cytoplasmic		GH3	Non-effector	0	reduced_virulence		G	-	ko:K05349
EXM03906.1	Serine hydrolase involved in the detoxification of formaldehyde		0	NO_SP	0	0	FALSE	FALSE	noTP	Plastid	mito	Membrane bound Mitochondrial			Cytoplasmic effector	0			S	GO:0003674,GO:0003824,GO:0005575,GO:0005622,GO:0005623,GO:0005737,GO:0005829,GO:0006081,GO:0008150,GO:0008152,GO:0009056,GO:0009636,GO:0009987,GO:0010033,GO:0016787,GO:0016788,GO:0016790,GO:0016999,GO:0017001,GO:0017144,GO:0018738,GO:0042221,GO:0044237,GO:0044248,GO:0044281,GO:0044282,GO:0044424,GO:0044444,GO:0044464,GO:0046185,GO:0046292,GO:0046294,GO:0050896,GO:0051716,GO:0070887,GO:0071704,GO:…	ko:K01070
EXM04077.1	CPSF A subunit region		0	NO_SP	0	1	FALSE	FALSE	noTP	Cytoplasm	cyto	Plasma membrane			Non-effector	0			A	GO:0000245,GO:0000375,GO:0000377,GO:0000398,GO:0003674,GO:0003676,GO:0003723,GO:0005488,GO:0005575,GO:0005622,GO:0005623,GO:0005634,GO:0005681,GO:0005684,GO:0005686,GO:0006139,GO:0006396,GO:0006397,GO:0006725,GO:0006807,GO:0008150,GO:0008152,GO:0008380,GO:0009987,GO:0010467,GO:0016043,GO:0016070,GO:0016071,GO:0017069,GO:0022607,GO:0022613,GO:0022618,GO:0030532,GO:0030620,GO:0032991,GO:0034622,GO:…	ko:K12830
EXM04117.1	glutathione synthetase		0	NO_SP	0	0	FALSE	FALSE	noTP	Cytoplasm	cyto_nucl	Cytoplasmic			Non-effector	0			Q	GO:0003674,GO:0003824,GO:0004363,GO:0005488,GO:0005575,GO:0005622,GO:0005623,GO:0005737,GO:0005829,GO:0006082,GO:0006518,GO:0006520,GO:0006575,GO:0006749,GO:0006750,GO:0006790,GO:0006807,GO:0008150,GO:0008152,GO:0009058,GO:0009987,GO:0016874,GO:0016879,GO:0016881,GO:0019184,GO:0019752,GO:0033218,GO:0034641,GO:0042277,GO:0042398,GO:0043043,GO:0043167,GO:0043168,GO:0043295,GO:0043436,GO:0043603,GO:…	ko:K21456
EXM04121.1	Single-strand binding protein family		0	NO_SP	0	0	FALSE	FALSE	mTP	Mitochondrion	mito	Mitochondrial			Cytoplasmic effector	0	lethal		L	GO:0000002,GO:0003674,GO:0003676,GO:0003677,GO:0003697,GO:0005488,GO:0005575,GO:0005622,GO:0005623,GO:0005737,GO:0005739,GO:0005759,GO:0006139,GO:0006259,GO:0006260,GO:0006261,GO:0006264,GO:0006275,GO:0006725,GO:0006807,GO:0006996,GO:0007005,GO:0008150,GO:0008152,GO:0009058,GO:0009059,GO:0009295,GO:0009889,GO:0009891,GO:0009893,GO:0009987,GO:0010556,GO:0010557,GO:0010604,GO:0010638,GO:0010821,GO:…	-
EXM04144.1	D-lactate dehydrogenase 2, mitochondrial precursor		0	NO_SP	0	0	FALSE	FALSE	mTP	Mitochondrion	mito	Mitochondrial			Non-effector	0	loss_of_pathogenicity		C	GO:0000166,GO:0003674,GO:0003779,GO:0003824,GO:0004457,GO:0004458,GO:0005488,GO:0005515,GO:0005575,GO:0005622,GO:0005623,GO:0005737,GO:0005739,GO:0005759,GO:0006082,GO:0006089,GO:0006091,GO:0008092,GO:0008150,GO:0008152,GO:0009056,GO:0009987,GO:0015980,GO:0016054,GO:0016491,GO:0016614,GO:0016898,GO:0019516,GO:0019752,GO:0022900,GO:0022904,GO:0031974,GO:0032787,GO:0036094,GO:0043167,GO:0043168,GO:…	ko:K21618
EXM04154.1	Belongs to the universal ribosomal protein uS8 family		0	NO_SP	0	0	FALSE	FALSE	noTP	Mitochondrion	cyto	Cytoplasmic			Cytoplasmic effector	0			J	GO:0002181,GO:0003674,GO:0003735,GO:0005198,GO:0005575,GO:0005622,GO:0005623,GO:0005737,GO:0005829,GO:0005840,GO:0006412,GO:0006518,GO:0006807,GO:0008150,GO:0008152,GO:0009058,GO:0009059,GO:0009987,GO:0010467,GO:0015935,GO:0019538,GO:0022626,GO:0022627,GO:0032991,GO:0034641,GO:0034645,GO:0043043,GO:0043170,GO:0043226,GO:0043228,GO:0043229,GO:0043232,GO:0043603,GO:0043604,GO:0044237,GO:0044238,GO:…	ko:K02957
EXM04248.1	Ribosomal L37ae protein family		0	NO_SP	0	0	FALSE	FALSE	noTP	Cytoplasm	mito	Membrane bound Mitochondrial			Cytoplasmic effector	0			J	GO:0002181,GO:0003674,GO:0003735,GO:0005198,GO:0005575,GO:0005622,GO:0005623,GO:0005737,GO:0005829,GO:0005840,GO:0006412,GO:0006518,GO:0006807,GO:0008150,GO:0008152,GO:0009058,GO:0009059,GO:0009987,GO:0010467,GO:0015934,GO:0019538,GO:0022625,GO:0022626,GO:0032991,GO:0034641,GO:0034645,GO:0043043,GO:0043170,GO:0043226,GO:0043228,GO:0043229,GO:0043232,GO:0043603,GO:0043604,GO:0044237,GO:0044238,GO:…	ko:K02921
EXM04380.1	3-hydroxybutyryl-CoA dehydrogenase		0	NO_SP	0	0	FALSE	FALSE	mTP	Mitochondrion	mito	Membrane bound Mitochondrial			Non-effector	0	unaffected_pathogenicity		I	-	ko:K00074
EXM04407.1	-	Y	0	NO_SP	0	0	FALSE	FALSE	noTP	Cytoplasm	cyto	Extracellular (Secreted)			Non-effector	0			-	-	-
EXM04512.1	Acetamidase/Formamidase family	Y	0	NO_SP	0	0	FALSE	FALSE	noTP	Cytoplasm	cyto	Cytoplasmic			Non-effector	0			C	-	ko:K01455
EXM04578.1	The H protein shuttles the methylamine group of glycine from the P protein to the T protein		0	NO_SP	0	0	FALSE	FALSE	mTP	Mitochondrion	mito	Mitochondrial			Non-effector	0			E	GO:0001505,GO:0005575,GO:0005622,GO:0005623,GO:0005737,GO:0005739,GO:0005960,GO:0006082,GO:0006464,GO:0006520,GO:0006544,GO:0006546,GO:0006730,GO:0006807,GO:0008150,GO:0008152,GO:0009056,GO:0009063,GO:0009069,GO:0009071,GO:0009249,GO:0009987,GO:0010467,GO:0016054,GO:0017144,GO:0018065,GO:0018193,GO:0018205,GO:0019464,GO:0019538,GO:0019752,GO:0032991,GO:0036211,GO:0042133,GO:0042135,GO:0042737,GO:…	ko:K02437
EXM04639.1	translation initiation factor IF-3	Y	0	NO_SP	0	0	FALSE	FALSE	mTP	Mitochondrion	nucl	Mitochondrial			Cytoplasmic effector	0			J	-	ko:K02520
EXM04670.1	to ubiquitin C-terminal hydrolase L3		0	NO_SP	0	1	FALSE	FALSE	noTP	Cytoplasm	cyto	Cytoplasmic			Non-effector	0			O	GO:0000338,GO:0003674,GO:0003824,GO:0004843,GO:0005575,GO:0005622,GO:0005623,GO:0005737,GO:0006464,GO:0006508,GO:0006807,GO:0008150,GO:0008152,GO:0008233,GO:0008234,GO:0009987,GO:0010992,GO:0016579,GO:0016787,GO:0019538,GO:0019725,GO:0019783,GO:0019784,GO:0036211,GO:0036459,GO:0042592,GO:0043170,GO:0043412,GO:0044237,GO:0044238,GO:0044260,GO:0044267,GO:0044424,GO:0044464,GO:0065007,GO:0065008,GO:…	ko:K05609
EXM04689.1	iron ion binding	Y	0	NO_SP	0	0	FALSE	FALSE	noTP	Cytoplasm	cyto_nucl	Cytoplasmic			Cytoplasmic effector	0	reduced_virulence		C	-	-
EXM04691.1	-	Y	0	SP	0	0	FALSE	FALSE	noTP	Extracellular	mito	Membrane bound Extracellular (Secreted)	Classical_secreted		Apoplastic/cytoplasmic effector	1		Y	-	-	-
EXM04783.1	RmlD substrate binding domain	Y	0	NO_SP	0	0	FALSE	FALSE	noTP	Plastid	mito	Mitochondrial			Non-effector	0	loss_of_pathogenicity		Q	GO:0003674,GO:0003824,GO:0003978,GO:0004034,GO:0005488,GO:0005515,GO:0005575,GO:0005622,GO:0005623,GO:0005737,GO:0005829,GO:0005975,GO:0005996,GO:0006012,GO:0006464,GO:0006486,GO:0006807,GO:0008150,GO:0008152,GO:0009056,GO:0009058,GO:0009059,GO:0009100,GO:0009101,GO:0009987,GO:0016052,GO:0016853,GO:0016854,GO:0016857,GO:0019318,GO:0019320,GO:0019388,GO:0019538,GO:0033499,GO:0034645,GO:0036211,GO:…	ko:K01784,ko:K01785
EXM04818.1	Galactose-1-phosphate uridylyltransferase		0	NO_SP	0	0	FALSE	FALSE	noTP	Cytoplasm	cyto_nucl	Membrane bound Mitochondrial			Non-effector	0			H	GO:0003674,GO:0003824,GO:0004335,GO:0005488,GO:0005506,GO:0005575,GO:0005622,GO:0005623,GO:0005737,GO:0005829,GO:0005975,GO:0005996,GO:0006012,GO:0006139,GO:0006464,GO:0006486,GO:0006725,GO:0006793,GO:0006796,GO:0006807,GO:0008108,GO:0008150,GO:0008152,GO:0008198,GO:0008270,GO:0009056,GO:0009058,GO:0009059,GO:0009100,GO:0009101,GO:0009225,GO:0009226,GO:0009987,GO:0016052,GO:0016301,GO:0016310,GO:…	ko:K00965
EXM04847.1	Phosphatidylinositol-specific phospholipase C, X domain		0	NO_SP	1	1	FALSE	FALSE	noTP	Golgi_apparatus	extr	Membrane bound Golgi			Non-effector	0			S	-	ko:K01771
EXM04914.1	dipeptidyl aminopeptidase		0	NO_SP	1	1	FALSE	FALSE	noTP	Endoplasmic_reticulum	plas	Plasma membrane	Classical_membrane		Non-effector	0	reduced_virulence		O	GO:0000322,GO:0000323,GO:0000324,GO:0000329,GO:0003674,GO:0003824,GO:0004177,GO:0005575,GO:0005622,GO:0005623,GO:0005737,GO:0005773,GO:0005774,GO:0006508,GO:0006807,GO:0008150,GO:0008152,GO:0008233,GO:0008238,GO:0008239,GO:0010467,GO:0016020,GO:0016485,GO:0016787,GO:0019538,GO:0031090,GO:0043170,GO:0043226,GO:0043227,GO:0043229,GO:0043231,GO:0044238,GO:0044422,GO:0044424,GO:0044437,GO:0044444,GO:…	ko:K01282
EXM05050.1	Belongs to the class-III pyridoxal-phosphate-dependent aminotransferase family		0	NO_SP	0	0	FALSE	FALSE	mTP	Mitochondrion	mito	Mitochondrial			Non-effector	0	unaffected_pathogenicity__reduced_virulence		E	GO:0001505,GO:0003674,GO:0003824,GO:0003867,GO:0005488,GO:0005575,GO:0005622,GO:0005623,GO:0005737,GO:0005739,GO:0005829,GO:0006082,GO:0006520,GO:0006536,GO:0006807,GO:0008144,GO:0008150,GO:0008152,GO:0008483,GO:0009056,GO:0009063,GO:0009064,GO:0009448,GO:0009450,GO:0009987,GO:0016054,GO:0016740,GO:0016769,GO:0019740,GO:0019752,GO:0019842,GO:0030170,GO:0032787,GO:0034641,GO:0036094,GO:0042133,GO:…	ko:K13524
EXM05171.1	Ribosomal protein S10p/S20e		0	NO_SP	0	0	FALSE	FALSE	noTP	Cytoplasm	nucl	Nuclear			Cytoplasmic effector	0			J	GO:0000462,GO:0002181,GO:0003674,GO:0003676,GO:0003723,GO:0003729,GO:0003735,GO:0005198,GO:0005488,GO:0005575,GO:0005622,GO:0005623,GO:0005737,GO:0005829,GO:0005840,GO:0006139,GO:0006364,GO:0006396,GO:0006412,GO:0006518,GO:0006725,GO:0006807,GO:0008150,GO:0008152,GO:0009058,GO:0009059,GO:0009987,GO:0010467,GO:0015935,GO:0016070,GO:0016072,GO:0019538,GO:0022613,GO:0022626,GO:0022627,GO:0030490,GO:…	ko:K02969
EXM05177.1	Nuclear cap-binding protein subunit 2		0	NO_SP	0	0	FALSE	FALSE	noTP	Nucleus	nucl	Nuclear			Cytoplasmic effector	0	lethal		A	GO:0000243,GO:0000339,GO:0000375,GO:0000377,GO:0000398,GO:0003674,GO:0003676,GO:0003723,GO:0005488,GO:0005575,GO:0005622,GO:0005623,GO:0005634,GO:0005681,GO:0005684,GO:0005846,GO:0006139,GO:0006396,GO:0006397,GO:0006725,GO:0006807,GO:0008150,GO:0008152,GO:0008380,GO:0009987,GO:0010467,GO:0016070,GO:0016071,GO:0032991,GO:0034518,GO:0034641,GO:0043170,GO:0043226,GO:0043227,GO:0043229,GO:0043231,GO:…	ko:K12883
EXM05215.1	Belongs to the peptidase A1 family		0	SP	0	1	FALSE	FALSE	noTP	Cell_membrane	extr	Membrane bound Golgi	Classical_membrane		Non-effector	0	unaffected_pathogenicity__reduced_virulence		O	GO:0003674,GO:0003824,GO:0004175,GO:0004190,GO:0005575,GO:0005576,GO:0005618,GO:0005622,GO:0005623,GO:0005737,GO:0005783,GO:0005789,GO:0005886,GO:0006508,GO:0006807,GO:0008150,GO:0008152,GO:0008233,GO:0009056,GO:0009057,GO:0009277,GO:0009897,GO:0009986,GO:0009987,GO:0012505,GO:0016020,GO:0016043,GO:0016787,GO:0019538,GO:0030163,GO:0030312,GO:0031224,GO:0031225,GO:0031226,GO:0031233,GO:0031362,GO:…	-
EXM05317.1	Putative peptidase family		0	SP	0	0	FALSE	FALSE	SP	Plastid	extr	Membrane bound Extracellular (Secreted)	Classical_secreted		Non-effector	0	reduced_virulence__effector_(plant_avirulence_determinant)	Y	S	GO:0001411,GO:0002673,GO:0002682,GO:0002683,GO:0002697,GO:0002698,GO:0002920,GO:0002921,GO:0003674,GO:0005102,GO:0005178,GO:0005488,GO:0005515,GO:0005575,GO:0005576,GO:0005618,GO:0005623,GO:0006873,GO:0006875,GO:0006882,GO:0007155,GO:0007159,GO:0008150,GO:0008270,GO:0009277,GO:0009605,GO:0009607,GO:0009892,GO:0009986,GO:0009987,GO:0010468,GO:0010605,GO:0010629,GO:0010955,GO:0019222,GO:0019725,GO:…	-
EXM05448.1	-	Y	0	NO_SP	0	0	FALSE	FALSE	noTP	Cytoplasm	cyto	Cytoplasmic			Cytoplasmic effector	0			-	-	-
EXM05466.1	Translation machinery associated TMA7		0	NO_SP	0	0	FALSE	FALSE	noTP	Nucleus	nucl	Nuclear			Cytoplasmic effector	0			S	-	-
EXM05584.1	Ran-binding domain		0	NO_SP	0	0	FALSE	FALSE	noTP	Cytoplasm	cyto_nucl	Cytoplasmic			Cytoplasmic effector	0			U	GO:0000082,GO:0000166,GO:0000226,GO:0000278,GO:0001882,GO:0001883,GO:0003674,GO:0005488,GO:0005515,GO:0005525,GO:0005575,GO:0005622,GO:0005623,GO:0005634,GO:0005737,GO:0005829,GO:0006403,GO:0006405,GO:0006508,GO:0006511,GO:0006606,GO:0006807,GO:0006810,GO:0006886,GO:0006913,GO:0006996,GO:0007010,GO:0007017,GO:0007049,GO:0007051,GO:0007154,GO:0007165,GO:0007264,GO:0007265,GO:0008104,GO:0008150,GO:…	ko:K15306
EXM05646.1	Belongs to the universal ribosomal protein uS9 family		0	NO_SP	0	0	FALSE	FALSE	noTP	Cytoplasm	mito	Cytoplasmic			Cytoplasmic/apoplastic effector	0			J	GO:0000462,GO:0002181,GO:0003674,GO:0003676,GO:0003723,GO:0003735,GO:0005198,GO:0005488,GO:0005575,GO:0005622,GO:0005623,GO:0005737,GO:0005829,GO:0005840,GO:0006139,GO:0006259,GO:0006310,GO:0006364,GO:0006396,GO:0006412,GO:0006518,GO:0006725,GO:0006807,GO:0008150,GO:0008152,GO:0009058,GO:0009059,GO:0009987,GO:0010467,GO:0015935,GO:0016070,GO:0016072,GO:0019538,GO:0022613,GO:0022626,GO:0022627,GO:…	ko:K02960
EXM05664.1	Ribosomal protein L34e		0	NO_SP	0	0	FALSE	FALSE	noTP	Mitochondrion	mito	Cytoplasmic			Cytoplasmic effector	0			J	GO:0002181,GO:0003674,GO:0003676,GO:0003723,GO:0003735,GO:0005198,GO:0005488,GO:0005575,GO:0005622,GO:0005623,GO:0005737,GO:0005829,GO:0005840,GO:0006412,GO:0006518,GO:0006807,GO:0008150,GO:0008152,GO:0009058,GO:0009059,GO:0009987,GO:0010467,GO:0015934,GO:0019538,GO:0022613,GO:0022625,GO:0022626,GO:0030684,GO:0030687,GO:0032991,GO:0034641,GO:0034645,GO:0042254,GO:0043043,GO:0043170,GO:0043226,GO:…	ko:K02915
EXM05696.1	The pyruvate dehydrogenase complex catalyzes the overall conversion of pyruvate to acetyl-CoA and CO(2)		0	NO_SP	0	0	FALSE	FALSE	mTP	Mitochondrion	mito	Mitochondrial			Non-effector	0	unaffected_pathogenicity		C	GO:0003674,GO:0003824,GO:0004742,GO:0005575,GO:0005622,GO:0005623,GO:0005737,GO:0005739,GO:0005759,GO:0005967,GO:0006082,GO:0006084,GO:0006085,GO:0006086,GO:0006090,GO:0006139,GO:0006163,GO:0006164,GO:0006637,GO:0006725,GO:0006732,GO:0006753,GO:0006790,GO:0006793,GO:0006796,GO:0006807,GO:0008150,GO:0008152,GO:0009058,GO:0009108,GO:0009117,GO:0009150,GO:0009152,GO:0009165,GO:0009259,GO:0009260,GO:…	ko:K00627
EXM05811.1	Methyltransferase domain	Y	0	NO_SP	0	0	FALSE	FALSE	noTP	Mitochondrion	mito	Membrane bound Mitochondrial			Cytoplasmic effector	0	unaffected_pathogenicity		S	-	-
EXM05892.1	Histone H3		0	NO_SP	0	0	FALSE	FALSE	noTP	Nucleus	nucl	Nuclear			Cytoplasmic effector	0			B	GO:0000003,GO:0000075,GO:0000228,GO:0000278,GO:0000775,GO:0000785,GO:0000786,GO:0000788,GO:0000790,GO:0000792,GO:0001672,GO:0003006,GO:0003674,GO:0003676,GO:0003677,GO:0003682,GO:0005488,GO:0005575,GO:0005622,GO:0005623,GO:0005634,GO:0005657,GO:0005694,GO:0005720,GO:0005721,GO:0006139,GO:0006259,GO:0006281,GO:0006289,GO:0006323,GO:0006325,GO:0006333,GO:0006334,GO:0006351,GO:0006725,GO:0006807,GO:…	ko:K11253
EXM05946.1	Produces ATP from ADP in the presence of a proton gradient across the membrane		0	NO_SP	0	0	FALSE	FALSE	mTP	Mitochondrion	mito	Membrane bound Mitochondrial			Non-effector	0	unaffected_pathogenicity		C	GO:0000166,GO:0000275,GO:0003674,GO:0003824,GO:0005215,GO:0005488,GO:0005575,GO:0005622,GO:0005623,GO:0005737,GO:0005739,GO:0005740,GO:0005743,GO:0005753,GO:0005754,GO:0006091,GO:0006119,GO:0006139,GO:0006163,GO:0006164,GO:0006725,GO:0006753,GO:0006754,GO:0006793,GO:0006796,GO:0006807,GO:0006810,GO:0006811,GO:0006812,GO:0006839,GO:0008150,GO:0008152,GO:0008324,GO:0009058,GO:0009117,GO:0009123,GO:…	ko:K00700,ko:K02133
EXM05974.1	gtp-binding protein		0	NO_SP	0	0	FALSE	FALSE	noTP	Cytoplasm	cyto_nucl	Membrane bound Mitochondrial			Cytoplasmic effector	0	reduced_virulence		U	GO:0000003,GO:0000166,GO:0000212,GO:0000226,GO:0000278,GO:0000281,GO:0000910,GO:0000922,GO:0001882,GO:0001883,GO:0003674,GO:0003824,GO:0003924,GO:0005488,GO:0005525,GO:0005575,GO:0005622,GO:0005623,GO:0005628,GO:0005737,GO:0005739,GO:0005740,GO:0005741,GO:0005768,GO:0005794,GO:0005802,GO:0005819,GO:0005856,GO:0005933,GO:0005935,GO:0005938,GO:0006810,GO:0006886,GO:0006887,GO:0006996,GO:0007010,GO:…	ko:K07904,ko:K07905
EXM06025.1	-		0	NO_SP	0	0	FALSE	FALSE	mTP	Mitochondrion	mito	Nuclear			Cytoplasmic effector	0			-	-	-
EXM06047.1	Histidine Phosphotransfer domain		0	NO_SP	0	0	FALSE	FALSE	noTP	Cytoplasm	cyto	Nuclear			Cytoplasmic effector	0	loss_of_pathogenicity		T	GO:0000160,GO:0001932,GO:0001934,GO:0003674,GO:0003824,GO:0004672,GO:0005488,GO:0005515,GO:0005575,GO:0005622,GO:0005623,GO:0005634,GO:0005737,GO:0005829,GO:0006464,GO:0006468,GO:0006793,GO:0006796,GO:0006807,GO:0006950,GO:0006970,GO:0006979,GO:0007154,GO:0007165,GO:0007231,GO:0007234,GO:0007346,GO:0008150,GO:0008152,GO:0009628,GO:0009893,GO:0009927,GO:0009966,GO:0009967,GO:0009987,GO:0010389,GO:…	ko:K11232
EXM06091.1	Belongs to the peptidase A1 family		0	NO_SP	0	1	FALSE	TRUE	noTP	Cell_membrane	extr	Membrane bound Extracellular (Secreted)	Classical_membrane		Non-effector	0	unaffected_pathogenicity		O	GO:0003674,GO:0003824,GO:0004175,GO:0004190,GO:0006508,GO:0006807,GO:0008150,GO:0008152,GO:0008233,GO:0016787,GO:0019538,GO:0043170,GO:0044238,GO:0070001,GO:0070011,GO:0071704,GO:0140096,GO:1901564	ko:K01379,ko:K01381
EXM06095.1	Belongs to the small GTPase superfamily. Rho family		0	NO_SP	0	0	FALSE	FALSE	noTP	Cell_membrane	cyto	Cytoplasmic			Cytoplasmic effector	0	reduced_virulence		U	GO:0000003,GO:0000131,GO:0000148,GO:0000166,GO:0000271,GO:0000278,GO:0000281,GO:0000910,GO:0000935,GO:0001411,GO:0001882,GO:0001883,GO:0003674,GO:0003824,GO:0003924,GO:0005488,GO:0005525,GO:0005575,GO:0005622,GO:0005623,GO:0005737,GO:0005739,GO:0005740,GO:0005741,GO:0005777,GO:0005783,GO:0005794,GO:0005886,GO:0005933,GO:0005934,GO:0005935,GO:0005937,GO:0005975,GO:0005976,GO:0006073,GO:0006074,GO:…	ko:K04513,ko:K07975
EXM06099.1	urease accessory protein (UreG)		0	NO_SP	0	0	FALSE	FALSE	noTP	Cytoplasm	cyto	Cytoplasmic			Non-effector	0			KO	GO:0006807,GO:0008150,GO:0008152,GO:0009987,GO:0019627,GO:0034641,GO:0043603,GO:0044237,GO:0044281,GO:0071704,GO:0071941,GO:1901564	ko:K03189
EXM06201.1	Destroys radicals which are normally produced within the cells and which are toxic to biological systems		0	NO_SP	0	0	FALSE	FALSE	noTP	Cytoplasm	mito	Extracellular (Secreted)			Cytoplasmic effector	0	reduced_virulence		P	GO:0000302,GO:0000303,GO:0000305,GO:0001300,GO:0001302,GO:0001306,GO:0001315,GO:0001320,GO:0001323,GO:0001324,GO:0003674,GO:0003824,GO:0004784,GO:0005488,GO:0005575,GO:0005622,GO:0005623,GO:0005737,GO:0005739,GO:0005759,GO:0006801,GO:0006950,GO:0006979,GO:0007568,GO:0007569,GO:0007571,GO:0008150,GO:0008152,GO:0009636,GO:0009987,GO:0010035,GO:0016209,GO:0016491,GO:0016721,GO:0019430,GO:0030145,GO:…	ko:K04564
EXM06259.1	Histone H2A		1	NO_SP	0	0	FALSE	FALSE	noTP	Nucleus	nucl	Nuclear			Cytoplasmic effector	0	unaffected_pathogenicity		B	GO:0000070,GO:0000122,GO:0000228,GO:0000278,GO:0000280,GO:0000775,GO:0000781,GO:0000784,GO:0000785,GO:0000786,GO:0000788,GO:0000790,GO:0000792,GO:0000819,GO:0003674,GO:0003676,GO:0003677,GO:0005488,GO:0005575,GO:0005622,GO:0005623,GO:0005634,GO:0005657,GO:0005694,GO:0005720,GO:0005721,GO:0005724,GO:0006139,GO:0006259,GO:0006281,GO:0006282,GO:0006323,GO:0006325,GO:0006333,GO:0006342,GO:0006355,GO:…	ko:K11251
EXM06277.1	Nucleolar essential protein 1		0	NO_SP	0	0	FALSE	FALSE	noTP	Nucleus	mito	Nuclear			Non-effector	0			J	GO:0000154,GO:0000447,GO:0000460,GO:0000462,GO:0000466,GO:0000469,GO:0000472,GO:0000478,GO:0000479,GO:0000480,GO:0000966,GO:0000967,GO:0001510,GO:0003674,GO:0003676,GO:0003723,GO:0003824,GO:0005488,GO:0005575,GO:0005622,GO:0005623,GO:0005634,GO:0005730,GO:0005737,GO:0005856,GO:0005874,GO:0005880,GO:0006139,GO:0006364,GO:0006396,GO:0006725,GO:0006807,GO:0008150,GO:0008152,GO:0008168,GO:0008173,GO:…	ko:K14568
EXM06304.1	RNA recognition motif	Y	0	NO_SP	0	0	FALSE	FALSE	noTP	Cytoplasm	cyto	Cytoplasmic			Apoplastic effector	0			A	GO:0000723,GO:0000956,GO:0003674,GO:0003676,GO:0003677,GO:0003697,GO:0003723,GO:0003729,GO:0005488,GO:0005575,GO:0005622,GO:0005623,GO:0005634,GO:0005737,GO:0005829,GO:0006139,GO:0006259,GO:0006401,GO:0006402,GO:0006403,GO:0006405,GO:0006406,GO:0006611,GO:0006725,GO:0006807,GO:0006810,GO:0006886,GO:0006913,GO:0006996,GO:0008104,GO:0008150,GO:0008152,GO:0009056,GO:0009057,GO:0009892,GO:0009987,GO:…	-
EXM06322.1	Erv1 / Alr family	Y	0	NO_SP	0	0	FALSE	FALSE	noTP	Cytoplasm	cyto	Membrane bound Extracellular (Secreted)			Cytoplasmic effector	0			E	GO:0000166,GO:0003674,GO:0003756,GO:0003824,GO:0005488,GO:0005575,GO:0005622,GO:0005623,GO:0005737,GO:0005739,GO:0005740,GO:0005758,GO:0006605,GO:0006626,GO:0006810,GO:0006839,GO:0006873,GO:0006875,GO:0006879,GO:0006886,GO:0006950,GO:0006979,GO:0006996,GO:0007005,GO:0008104,GO:0008150,GO:0008152,GO:0009987,GO:0015031,GO:0015035,GO:0015036,GO:0015833,GO:0016043,GO:0016491,GO:0016667,GO:0016670,GO:…	ko:K17783,ko:K18182
EXM06329.1	Mitogen-activated protein kinase	Y	0	NO_SP	0	0	FALSE	FALSE	noTP	Cytoplasm	nucl	Cytoplasmic			Cytoplasmic effector	0	loss_of_pathogenicity__unaffected_pathogenicity__reduced_virulence		T	GO:0000003,GO:0000165,GO:0000166,GO:0000746,GO:0000747,GO:0000749,GO:0000750,GO:0001402,GO:0001403,GO:0001932,GO:0001933,GO:0002831,GO:0002833,GO:0003006,GO:0003674,GO:0003824,GO:0004672,GO:0004674,GO:0004707,GO:0005488,GO:0005515,GO:0005524,GO:0005575,GO:0005622,GO:0005623,GO:0005634,GO:0005737,GO:0005739,GO:0005933,GO:0005935,GO:0005937,GO:0006355,GO:0006464,GO:0006468,GO:0006793,GO:0006796,GO:…	ko:K04371
EXM06473.1	component of the eukaryotic translation initiation factor 3 (eIF-3) complex, which is involved in protein synthesis of a specialized repertoire of mRNAs and, together with other initiation factors, stimulates binding of mRNA and methionyl-tRNAi to the 40S ribosome. The eIF-3 complex specifically targets and initiates translation of a subset of mRNAs involved in cell proliferation		0	NO_SP	0	0	FALSE	FALSE	noTP	Cytoplasm	nucl	Cytoplasmic			Non-effector	0			J	GO:0005575,GO:0005622,GO:0005623,GO:0005737,GO:0005852,GO:0032991,GO:0044424,GO:0044444,GO:0044464	ko:K15028
EXM06531.1	Belongs to the ATCase OTCase family		0	NO_SP	0	0	FALSE	FALSE	mTP	Mitochondrion	mito	Membrane bound Mitochondrial			Non-effector	0	unaffected_pathogenicity__reduced_virulence		E	GO:0000050,GO:0003674,GO:0003824,GO:0004585,GO:0005575,GO:0005622,GO:0005623,GO:0005737,GO:0005739,GO:0005759,GO:0005829,GO:0006082,GO:0006520,GO:0006525,GO:0006526,GO:0006591,GO:0006807,GO:0008150,GO:0008152,GO:0008652,GO:0009058,GO:0009064,GO:0009084,GO:0009987,GO:0016053,GO:0016740,GO:0016741,GO:0016743,GO:0019627,GO:0019752,GO:0031974,GO:0034641,GO:0042450,GO:0043226,GO:0043227,GO:0043229,GO:…	ko:K00611
EXM06554.1	This protein is one of the nuclear-coded polypeptide chains of cytochrome c oxidase, the terminal oxidase in mitochondrial electron transport		0	NO_SP	0	0	FALSE	FALSE	noTP	Mitochondrion	nucl	Extracellular (Secreted)			Cytoplasmic/apoplastic effector	0			C	GO:0005575,GO:0005622,GO:0005623,GO:0005737,GO:0005739,GO:0005740,GO:0005743,GO:0005746,GO:0005751,GO:0005758,GO:0006996,GO:0007005,GO:0008150,GO:0008535,GO:0009987,GO:0016020,GO:0016021,GO:0016043,GO:0017004,GO:0019866,GO:0022607,GO:0031090,GO:0031224,GO:0031966,GO:0031967,GO:0031970,GO:0031974,GO:0031975,GO:0032991,GO:0033108,GO:0033617,GO:0034622,GO:0043226,GO:0043227,GO:0043229,GO:0043231,GO:…	ko:K02267
EXM06589.1	Belongs to the actin-binding proteins ADF family		0	NO_SP	0	0	FALSE	FALSE	noTP	Cytoplasm	cyto	Cytoplasmic			Cytoplasmic effector	0	unaffected_pathogenicity__reduced_virulence__increased_virulence_(hypervirulence)		Z	-	ko:K05765
EXM06961.1	to aldose 1-epimerase		0	NO_SP	0	0	FALSE	FALSE	SP	Extracellular	extr	Extracellular (Secreted)	Non-classical_secreted		Apoplastic effector	0		Y	G	-	ko:K01785
EXM07038.1	Belongs to the universal ribosomal protein uS7 family		0	NO_SP	0	0	FALSE	FALSE	noTP	Cytoplasm	cyto	Cytoplasmic			Cytoplasmic effector	0			J	GO:0000028,GO:0002181,GO:0003674,GO:0003676,GO:0003723,GO:0003729,GO:0003735,GO:0005198,GO:0005488,GO:0005575,GO:0005622,GO:0005623,GO:0005737,GO:0005829,GO:0005840,GO:0006403,GO:0006405,GO:0006407,GO:0006412,GO:0006450,GO:0006518,GO:0006611,GO:0006807,GO:0006810,GO:0006886,GO:0006913,GO:0006996,GO:0008104,GO:0008150,GO:0008152,GO:0009058,GO:0009059,GO:0009987,GO:0010467,GO:0015031,GO:0015833,GO:…	ko:K02989
EXM07067.1	Ribosomal L27e protein family		0	NO_SP	0	0	FALSE	FALSE	noTP	Cytoplasm	mito	Mitochondrial			Cytoplasmic effector	0			J	GO:0002181,GO:0003674,GO:0003735,GO:0005198,GO:0005575,GO:0005622,GO:0005623,GO:0005737,GO:0005829,GO:0005840,GO:0006412,GO:0006518,GO:0006807,GO:0008150,GO:0008152,GO:0009058,GO:0009059,GO:0009987,GO:0010467,GO:0015934,GO:0019538,GO:0022625,GO:0022626,GO:0030684,GO:0030687,GO:0032991,GO:0034641,GO:0034645,GO:0043043,GO:0043170,GO:0043226,GO:0043228,GO:0043229,GO:0043232,GO:0043603,GO:0043604,GO:…	ko:K02901
EXM07122.1	Nucleoside diphosphate kinase		0	NO_SP	1	1	FALSE	FALSE	noTP	Endoplasmic_reticulum	plas	Membrane bound Mitochondrial			Non-effector	0	reduced_virulence		F	GO:0003674,GO:0003824,GO:0004550,GO:0005575,GO:0005576,GO:0005622,GO:0005623,GO:0005737,GO:0005739,GO:0005740,GO:0005758,GO:0005829,GO:0006139,GO:0006165,GO:0006213,GO:0006220,GO:0006221,GO:0006241,GO:0006725,GO:0006753,GO:0006793,GO:0006796,GO:0006807,GO:0006950,GO:0006974,GO:0008150,GO:0008152,GO:0009058,GO:0009116,GO:0009117,GO:0009119,GO:0009132,GO:0009141,GO:0009142,GO:0009147,GO:0009148,GO:…	ko:K00940
EXM07138.1	-		0	NO_SP	0	0	FALSE	FALSE	mTP	Mitochondrion	mito	Membrane bound Mitochondrial			Cytoplasmic effector	0			-	-	-
EXM07339.1	mannitol-1-phosphate dehydrogenase		0	NO_SP	0	0	FALSE	FALSE	noTP	Cytoplasm	cyto	Cytoplasmic			Non-effector	0	unaffected_pathogenicity		E	GO:0000166,GO:0003674,GO:0003824,GO:0005488,GO:0005575,GO:0005576,GO:0005622,GO:0005623,GO:0005975,GO:0006059,GO:0006066,GO:0006950,GO:0006979,GO:0008150,GO:0008152,GO:0008926,GO:0009058,GO:0009266,GO:0009408,GO:0009628,GO:0009987,GO:0016051,GO:0016491,GO:0016614,GO:0016616,GO:0019400,GO:0019401,GO:0019406,GO:0019593,GO:0019594,GO:0019751,GO:0033554,GO:0034599,GO:0034605,GO:0034637,GO:0036094,GO:…	ko:K00009
EXM07363.1	Galactose oxidase, central domain	Y	0	NO_SP	0	0	FALSE	FALSE	mTP	Mitochondrion	mito	Membrane bound Mitochondrial			Non-effector	0	reduced_virulence		S	-	-
EXM07677.1	Belongs to the eukaryotic ribosomal protein eS1 family		0	NO_SP	0	0	FALSE	FALSE	noTP	Nucleus	nucl	Cytoplasmic			Cytoplasmic effector	0			J	GO:0000462,GO:0002181,GO:0003674,GO:0003735,GO:0005198,GO:0005575,GO:0005576,GO:0005618,GO:0005622,GO:0005623,GO:0005737,GO:0005829,GO:0005840,GO:0006139,GO:0006364,GO:0006396,GO:0006412,GO:0006518,GO:0006725,GO:0006807,GO:0008150,GO:0008152,GO:0009058,GO:0009059,GO:0009277,GO:0009987,GO:0010467,GO:0015935,GO:0016070,GO:0016072,GO:0019538,GO:0022613,GO:0022626,GO:0022627,GO:0030312,GO:0030446,GO:…	ko:K02984
EXM07687.1	to rheb GTPase RhbA		0	NO_SP	0	0	FALSE	FALSE	noTP	Cell_membrane	nucl	Cytoplasmic			Cytoplasmic effector	0	reduced_virulence		S	GO:0000166,GO:0001882,GO:0001883,GO:0003674,GO:0003824,GO:0003924,GO:0005488,GO:0005525,GO:0005575,GO:0005622,GO:0005623,GO:0005737,GO:0005829,GO:0005886,GO:0006810,GO:0006811,GO:0006812,GO:0006820,GO:0006865,GO:0007049,GO:0007050,GO:0007154,GO:0007165,GO:0007264,GO:0007346,GO:0008150,GO:0009987,GO:0010958,GO:0010963,GO:0015711,GO:0015802,GO:0015809,GO:0015819,GO:0015849,GO:0016020,GO:0016192,GO:…	ko:K07208
EXM07783.1	TB2/DP1, HVA22 family		0	NO_SP	3	4	FALSE	FALSE	noTP	Endoplasmic_reticulum	plas	Membrane bound Golgi			Non-effector	0			U	-	ko:K17279
EXM07921.1	Nucleotide exchange factor Fes1		0	NO_SP	0	0	FALSE	FALSE	noTP	Cytoplasm	nucl	Nuclear			Cytoplasmic effector	0			O	GO:0000166,GO:0000774,GO:0002181,GO:0003674,GO:0005488,GO:0005575,GO:0005622,GO:0005623,GO:0005737,GO:0005829,GO:0005840,GO:0006412,GO:0006508,GO:0006511,GO:0006515,GO:0006518,GO:0006807,GO:0006950,GO:0008150,GO:0008152,GO:0009056,GO:0009057,GO:0009058,GO:0009059,GO:0009987,GO:0010033,GO:0010467,GO:0010498,GO:0017076,GO:0019538,GO:0019941,GO:0022626,GO:0030163,GO:0030234,GO:0030554,GO:0032991,GO:…	-
EXM07962.1	to fumarylacetoacetate hydrolase family	Y	0	NO_SP	0	0	FALSE	FALSE	noTP	Mitochondrion	mito	Membrane bound Golgi			Non-effector	0	unaffected_pathogenicity		Q	-	-
EXM08006.1	ribosomal protein		0	NO_SP	0	0	FALSE	FALSE	noTP	Nucleus	mito	Membrane bound Mitochondrial			Non-effector	0			J	GO:0002181,GO:0003674,GO:0003676,GO:0003723,GO:0003735,GO:0005198,GO:0005488,GO:0005575,GO:0005622,GO:0005623,GO:0005737,GO:0005829,GO:0005840,GO:0006412,GO:0006518,GO:0006807,GO:0008150,GO:0008152,GO:0009058,GO:0009059,GO:0009987,GO:0010467,GO:0015934,GO:0019538,GO:0022625,GO:0022626,GO:0032991,GO:0034641,GO:0034645,GO:0043043,GO:0043170,GO:0043226,GO:0043228,GO:0043229,GO:0043232,GO:0043603,GO:…	ko:K02930
EXM08072.1	Glucose-repressible protein Grg1		0	NO_SP	0	0	FALSE	FALSE	noTP	Mitochondrion	nucl	Nuclear			Cytoplasmic effector	0			S	-	-
EXM08079.1	Hydroxyacylglutathione hydrolase C-terminus	Y	0	NO_SP	0	0	FALSE	FALSE	noTP	Mitochondrion	mito	Membrane bound Mitochondrial			Non-effector	0			DZ	GO:0003674,GO:0003824,GO:0004416,GO:0005575,GO:0005622,GO:0005623,GO:0005737,GO:0005739,GO:0005759,GO:0006081,GO:0006082,GO:0006089,GO:0008150,GO:0008152,GO:0009056,GO:0009438,GO:0009636,GO:0009987,GO:0016787,GO:0016788,GO:0016790,GO:0019243,GO:0019752,GO:0031974,GO:0032787,GO:0042180,GO:0042182,GO:0042221,GO:0043226,GO:0043227,GO:0043229,GO:0043231,GO:0043233,GO:0043436,GO:0044237,GO:0044248,GO:…	ko:K01069
EXM08294.1	Belongs to the type-B carboxylesterase lipase family	Y	0	NO_SP	1	1	FALSE	FALSE	noTP	Cell_membrane	plas	Plasma membrane	Classical_membrane		Non-effector	0	unaffected_pathogenicity		T	-	-
EXM08342.1	Cortical protein marker for cell polarity		0	SP	0	0	FALSE	FALSE	SP	Extracellular	extr	Membrane bound Extracellular (Secreted)	Classical_secreted		Non-effector	0			S	GO:0000278,GO:0000281,GO:0000282,GO:0000910,GO:0005575,GO:0005618,GO:0005621,GO:0005622,GO:0005623,GO:0005737,GO:0005739,GO:0005783,GO:0005886,GO:0005933,GO:0005935,GO:0006996,GO:0007010,GO:0007015,GO:0007049,GO:0007163,GO:0008150,GO:0008360,GO:0009277,GO:0009898,GO:0009987,GO:0012505,GO:0016020,GO:0016043,GO:0022402,GO:0022603,GO:0022604,GO:0030010,GO:0030029,GO:0030036,GO:0030312,GO:0030427,GO:…	-
EXM08352.1	Belongs to the universal ribosomal protein uS15 family		0	NO_SP	0	0	FALSE	FALSE	noTP	Mitochondrion	mito	Mitochondrial			Cytoplasmic effector	0			J	GO:0000462,GO:0002181,GO:0003674,GO:0003676,GO:0003723,GO:0003735,GO:0005198,GO:0005488,GO:0005575,GO:0005622,GO:0005623,GO:0005634,GO:0005730,GO:0005737,GO:0005829,GO:0005840,GO:0006139,GO:0006364,GO:0006396,GO:0006412,GO:0006518,GO:0006725,GO:0006807,GO:0008150,GO:0008152,GO:0009058,GO:0009059,GO:0009987,GO:0010467,GO:0015935,GO:0016070,GO:0016072,GO:0019538,GO:0019843,GO:0022613,GO:0022626,GO:…	ko:K02953
EXM08359.1	Mitochondrial glycoprotein		0	NO_SP	0	0	FALSE	FALSE	mTP	Mitochondrion	mito	Mitochondrial			Cytoplasmic effector	0	reduced_virulence		C	GO:0003674,GO:0003676,GO:0005488,GO:0005575,GO:0005622,GO:0005623,GO:0005737,GO:0005739,GO:0005759,GO:0006091,GO:0006417,GO:0008150,GO:0008152,GO:0008494,GO:0009060,GO:0009889,GO:0009891,GO:0009893,GO:0009987,GO:0010468,GO:0010556,GO:0010557,GO:0010604,GO:0010608,GO:0010628,GO:0015980,GO:0019222,GO:0031323,GO:0031325,GO:0031326,GO:0031328,GO:0031974,GO:0032268,GO:0032270,GO:0034248,GO:0034250,GO:…	ko:K15414
EXM08496.1	Glycogen recognition site of AMP-activated protein kinase	Y	0	NO_SP	1	1	FALSE	FALSE	noTP	Cell_membrane	extr	Plasma membrane	Classical_membrane		Non-effector	0			S	-	-
EXM08645.1	Eukaryotic protein of unknown function (DUF953)		0	NO_SP	0	0	FALSE	FALSE	noTP	Cytoplasm	cyto	Membrane bound Extracellular (Secreted)			Apoplastic/cytoplasmic effector	0	reduced_virulence		S	-	-
EXM08671.1	NAD(P)H-binding	Y	0	NO_SP	0	0	FALSE	FALSE	noTP	Plastid	cyto	Membrane bound Mitochondrial			Non-effector	0			GM	-	-
EXM08695.1	Rtf2 RING-finger	Y	0	NO_SP	0	0	FALSE	FALSE	noTP	Nucleus	nucl	Cytoplasmic			Cytoplasmic effector	0			S	GO:0005575,GO:0005622,GO:0005623,GO:0005634,GO:0006139,GO:0006259,GO:0006260,GO:0006261,GO:0006274,GO:0006725,GO:0006807,GO:0008150,GO:0008152,GO:0009058,GO:0009059,GO:0009987,GO:0010453,GO:0019222,GO:0031494,GO:0034641,GO:0034645,GO:0043170,GO:0043226,GO:0043227,GO:0043229,GO:0043231,GO:0044237,GO:0044238,GO:0044249,GO:0044260,GO:0044424,GO:0044464,GO:0045595,GO:0046483,GO:0050789,GO:0050793,GO:…	-
EXM08755.1	copper resistance protein crd2		0	NO_SP	0	0	FALSE	FALSE	noTP	Extracellular	nucl	Extracellular (Secreted)	Non-classical_secreted		Cytoplasmic/apoplastic effector	1	unaffected_pathogenicity	Y	S	-	-
EXM08776.1	-	Y	0	NO_SP	4	3	FALSE	FALSE	noTP	Cell_membrane	plas	Plasma membrane	Classical_membrane		Non-effector	0			-	-	-
EXM08966.1	Glucose-repressible protein Grg1		0	NO_SP	0	0	FALSE	FALSE	noTP	Plastid	cyto_nucl	Nuclear			Cytoplasmic effector	0			S	-	-
EXM09052.1	Stress responsive A/B Barrel Domain	Y	0	NO_SP	0	1	FALSE	FALSE	noTP	Mitochondrion	mito	Membrane bound Mitochondrial			Cytoplasmic effector	0			S	-	-
EXM09120.1	Destroys radicals which are normally produced within the cells and which are toxic to biological systems		0	NO_SP	0	0	FALSE	FALSE	noTP	Cytoplasm	cyto	Cytoplasmic			Cytoplasmic/apoplastic effector	0	reduced_virulence		Q	GO:0000003,GO:0000187,GO:0000302,GO:0000303,GO:0000305,GO:0000902,GO:0000904,GO:0001300,GO:0001306,GO:0001315,GO:0001320,GO:0001323,GO:0001324,GO:0001541,GO:0001817,GO:0001819,GO:0001890,GO:0001894,GO:0001895,GO:0001932,GO:0001934,GO:0002064,GO:0002065,GO:0002066,GO:0002093,GO:0002262,GO:0002376,GO:0002520,GO:0002576,GO:0002682,GO:0002694,GO:0003006,GO:0003008,GO:0003012,GO:0003013,GO:0003015,GO:…	ko:K04565
EXM09131.1	Belongs to the eukaryotic ribosomal protein eS4 family		0	NO_SP	0	0	FALSE	FALSE	noTP	Cytoplasm	mito	Mitochondrial			Cytoplasmic effector	0	reduced_virulence		J	GO:0002181,GO:0003674,GO:0003676,GO:0003723,GO:0003735,GO:0005198,GO:0005488,GO:0005575,GO:0005622,GO:0005623,GO:0005737,GO:0005829,GO:0005840,GO:0006412,GO:0006518,GO:0006807,GO:0008150,GO:0008152,GO:0009058,GO:0009059,GO:0009987,GO:0010467,GO:0015935,GO:0019538,GO:0022626,GO:0022627,GO:0030684,GO:0030686,GO:0032991,GO:0034641,GO:0034645,GO:0043043,GO:0043170,GO:0043226,GO:0043228,GO:0043229,GO:…	ko:K02987
EXM09155.1	Belongs to the malate synthase family		0	NO_SP	0	0	FALSE	FALSE	noTP	Peroxisome	pero	Membrane bound Mitochondrial			Non-effector	0	loss_of_pathogenicity		H	GO:0003674,GO:0003824,GO:0004474,GO:0005575,GO:0005622,GO:0005623,GO:0005737,GO:0005777,GO:0005782,GO:0005975,GO:0006081,GO:0006082,GO:0006097,GO:0008150,GO:0008152,GO:0009514,GO:0009987,GO:0016740,GO:0016746,GO:0019752,GO:0031907,GO:0031974,GO:0032787,GO:0042579,GO:0043226,GO:0043227,GO:0043229,GO:0043231,GO:0043233,GO:0043436,GO:0044237,GO:0044238,GO:0044262,GO:0044281,GO:0044422,GO:0044424,GO:…	ko:K01638
EXM09203.1	Redoxin		0	NO_SP	0	0	FALSE	FALSE	noTP	Cytoplasm	cyto	Golgi			Cytoplasmic effector	0			O	GO:0003674,GO:0003824,GO:0004601,GO:0005575,GO:0005622,GO:0005623,GO:0005737,GO:0005829,GO:0005886,GO:0006950,GO:0006979,GO:0008150,GO:0008152,GO:0008379,GO:0009636,GO:0009987,GO:0010035,GO:0010038,GO:0016020,GO:0016209,GO:0016491,GO:0016684,GO:0019725,GO:0033554,GO:0034599,GO:0042221,GO:0042592,GO:0044424,GO:0044444,GO:0044464,GO:0045454,GO:0050789,GO:0050794,GO:0050896,GO:0051716,GO:0051920,GO:…	ko:K11187,ko:K14171
EXM09204.1	60S ribosomal protein L24		0	NO_SP	0	0	FALSE	FALSE	noTP	Cytoplasm	nucl	Cytoplasmic			Cytoplasmic effector	0			J	GO:0000027,GO:0002181,GO:0003674,GO:0003676,GO:0003723,GO:0003735,GO:0005198,GO:0005488,GO:0005575,GO:0005622,GO:0005623,GO:0005737,GO:0005829,GO:0005840,GO:0006412,GO:0006518,GO:0006807,GO:0006996,GO:0008150,GO:0008152,GO:0009058,GO:0009059,GO:0009987,GO:0010467,GO:0015934,GO:0016043,GO:0019538,GO:0022607,GO:0022613,GO:0022618,GO:0022625,GO:0022626,GO:0032991,GO:0034622,GO:0034641,GO:0034645,GO:…	ko:K02896
EXM09215.1	Binds to the 23S rRNA		0	NO_SP	0	0	FALSE	FALSE	noTP	Cytoplasm	nucl	Nuclear			Cytoplasmic effector	0			J	GO:0000448,GO:0000460,GO:0000463,GO:0000466,GO:0000469,GO:0000470,GO:0000478,GO:0000479,GO:0002181,GO:0003674,GO:0003676,GO:0003723,GO:0003735,GO:0005198,GO:0005488,GO:0005575,GO:0005622,GO:0005623,GO:0005737,GO:0005829,GO:0005840,GO:0006139,GO:0006364,GO:0006396,GO:0006412,GO:0006518,GO:0006725,GO:0006807,GO:0008150,GO:0008152,GO:0008270,GO:0009058,GO:0009059,GO:0009987,GO:0010467,GO:0015934,GO:…	ko:K02922
EXM09311.1	Cellulase (glycosyl hydrolase family 5)	Y	0	NO_SP	1	1	FALSE	FALSE	noTP	Cell_membrane	nucl	Plasma membrane	Classical_membrane	GH5_9	Non-effector	0	unaffected_pathogenicity		U	GO:0000003,GO:0000272,GO:0000746,GO:0000747,GO:0000935,GO:0003674,GO:0003824,GO:0004338,GO:0004553,GO:0005575,GO:0005576,GO:0005622,GO:0005623,GO:0005856,GO:0005886,GO:0005937,GO:0005975,GO:0005976,GO:0006073,GO:0008150,GO:0008152,GO:0008422,GO:0009056,GO:0009057,GO:0009251,GO:0009986,GO:0009987,GO:0015629,GO:0015926,GO:0016020,GO:0016021,GO:0016043,GO:0016052,GO:0016787,GO:0016798,GO:0019953,GO:…	ko:K01210
EXM09377.1	Electron transfer flavoprotein-ubiquinone oxidoreductase		0	NO_SP	0	0	FALSE	FALSE	mTP	Mitochondrion	mito	Membrane bound Mitochondrial			Non-effector	0	reduced_virulence		C	GO:0003674,GO:0003824,GO:0004174,GO:0005488,GO:0005575,GO:0005622,GO:0005623,GO:0005737,GO:0005739,GO:0005740,GO:0005743,GO:0005759,GO:0006091,GO:0006116,GO:0006139,GO:0006725,GO:0006732,GO:0006733,GO:0006734,GO:0006753,GO:0006793,GO:0006796,GO:0006807,GO:0008150,GO:0008152,GO:0009055,GO:0009117,GO:0009987,GO:0015980,GO:0016020,GO:0016021,GO:0016491,GO:0016645,GO:0016649,GO:0016722,GO:0017133,GO:…	ko:K00311
EXM09432.1	Belongs to the peptidase S10 family	Y	0	SP	0	0	FALSE	TRUE	SP	Cell_membrane	extr	Membrane bound Extracellular (Secreted)	Classical_membrane		Non-effector	0	reduced_virulence		O	-	ko:K01288
EXM09485.1	nuclear transport factor 2		0	NO_SP	0	0	FALSE	FALSE	noTP	Cytoplasm	cyto_nucl	Cytoplasmic			Cytoplasmic effector	0			U	GO:0003674,GO:0005488,GO:0005515,GO:0005575,GO:0005622,GO:0005623,GO:0005634,GO:0005635,GO:0006606,GO:0006810,GO:0006886,GO:0006913,GO:0008104,GO:0008150,GO:0008536,GO:0012505,GO:0015031,GO:0015833,GO:0016020,GO:0016021,GO:0017016,GO:0017038,GO:0019899,GO:0031090,GO:0031224,GO:0031267,GO:0031965,GO:0031967,GO:0031975,GO:0033036,GO:0033365,GO:0034504,GO:0034613,GO:0042886,GO:0043226,GO:0043227,GO:…	-
EXM09528.1	aspartate-semialdehyde dehydrogenase		0	NO_SP	0	0	FALSE	FALSE	noTP	Peroxisome	mito	Membrane bound Peroxisomal			Non-effector	0			E	GO:0000096,GO:0000097,GO:0003674,GO:0003824,GO:0004073,GO:0005575,GO:0005622,GO:0005623,GO:0005634,GO:0005737,GO:0005886,GO:0006082,GO:0006520,GO:0006555,GO:0006566,GO:0006790,GO:0006807,GO:0008150,GO:0008152,GO:0008652,GO:0009058,GO:0009066,GO:0009067,GO:0009069,GO:0009070,GO:0009086,GO:0009088,GO:0009090,GO:0009092,GO:0009987,GO:0016020,GO:0016053,GO:0016491,GO:0016620,GO:0016903,GO:0019752,GO:…	ko:K00133
EXM09555.1	isovaleryl-CoA dehydrogenase, mitochondrial precursor		0	NO_SP	0	0	FALSE	FALSE	mTP	Mitochondrion	mito	Membrane bound Mitochondrial			Non-effector	0	reduced_virulence		EI	-	ko:K00253
EXM09607.1	Synaptobrevin	Y	0	NO_SP	1	1	FALSE	FALSE	noTP	Golgi_apparatus	plas	Mitochondrial			Cytoplasmic effector	0			U	GO:0000149,GO:0000922,GO:0003674,GO:0005484,GO:0005488,GO:0005515,GO:0005575,GO:0005622,GO:0005623,GO:0005737,GO:0005768,GO:0005794,GO:0005802,GO:0005819,GO:0005856,GO:0005886,GO:0005933,GO:0005935,GO:0005938,GO:0006810,GO:0006886,GO:0006887,GO:0006892,GO:0006893,GO:0006897,GO:0006906,GO:0006996,GO:0008104,GO:0008150,GO:0009987,GO:0012505,GO:0012506,GO:0015031,GO:0015630,GO:0015833,GO:0016020,GO:…	ko:K08513
EXM09674.1	Ndr family		0	NO_SP	0	1	FALSE	FALSE	mTP	Mitochondrion	mito	Membrane bound Mitochondrial			Non-effector	0			S	-	-
EXM10034.1	Belongs to the eukaryotic ribosomal protein eL20 family		0	NO_SP	0	0	FALSE	FALSE	noTP	Cytoplasm	nucl	Mitochondrial			Cytoplasmic effector	0			J	GO:0002181,GO:0003674,GO:0003676,GO:0003723,GO:0003735,GO:0005198,GO:0005488,GO:0005575,GO:0005622,GO:0005623,GO:0005737,GO:0005829,GO:0005840,GO:0006412,GO:0006518,GO:0006807,GO:0008150,GO:0008152,GO:0009058,GO:0009059,GO:0009987,GO:0010467,GO:0015934,GO:0019538,GO:0022625,GO:0022626,GO:0032991,GO:0034641,GO:0034645,GO:0043043,GO:0043170,GO:0043226,GO:0043228,GO:0043229,GO:0043232,GO:0043603,GO:…	ko:K02882
EXM10068.1	60S ribosomal protein L31		0	NO_SP	0	0	FALSE	FALSE	noTP	Cytoplasm	mito	Cytoplasmic			Cytoplasmic effector	0			J	GO:0002181,GO:0003674,GO:0003735,GO:0005198,GO:0005575,GO:0005622,GO:0005623,GO:0005737,GO:0005829,GO:0005840,GO:0006412,GO:0006450,GO:0006518,GO:0006807,GO:0008150,GO:0008152,GO:0009058,GO:0009059,GO:0009987,GO:0010467,GO:0015934,GO:0019538,GO:0022625,GO:0022626,GO:0032991,GO:0034641,GO:0034645,GO:0043043,GO:0043170,GO:0043226,GO:0043228,GO:0043229,GO:0043232,GO:0043603,GO:0043604,GO:0044237,GO:…	ko:K02910
EXM10159.1	Bacteriorhodopsin-like protein		0	NO_SP	7	7	FALSE	FALSE	noTP	Cell_membrane	plas	Membrane bound Mitochondrial	Classical_membrane		Non-effector	0	unaffected_pathogenicity		S	-	-
EXM10185.1	Plasma membrane ATPase		0	NO_SP	9	9	FALSE	FALSE	noTP	Cell_membrane	plas	Plasma membrane	Classical_membrane		Non-effector	0	loss_of_pathogenicity		P	GO:0000166,GO:0003674,GO:0003824,GO:0005215,GO:0005488,GO:0005524,GO:0005575,GO:0005622,GO:0005623,GO:0005737,GO:0005739,GO:0005829,GO:0005886,GO:0005887,GO:0006810,GO:0006811,GO:0006812,GO:0006873,GO:0006885,GO:0008144,GO:0008150,GO:0008324,GO:0008553,GO:0009987,GO:0015075,GO:0015077,GO:0015078,GO:0015318,GO:0015399,GO:0015405,GO:0015662,GO:0015672,GO:0016020,GO:0016021,GO:0016043,GO:0016462,GO:…	ko:K01535
EXM10297.1	Belongs to the uroporphyrinogen decarboxylase family		0	NO_SP	0	0	FALSE	FALSE	noTP	Mitochondrion	cyto	Cytoplasmic			Non-effector	0			H	GO:0003674,GO:0003824,GO:0004853,GO:0005575,GO:0005622,GO:0005623,GO:0005634,GO:0005737,GO:0005829,GO:0006725,GO:0006778,GO:0006779,GO:0006783,GO:0006807,GO:0008150,GO:0008152,GO:0009058,GO:0009987,GO:0016829,GO:0016830,GO:0016831,GO:0018130,GO:0019438,GO:0033013,GO:0033014,GO:0034641,GO:0042168,GO:0042440,GO:0043226,GO:0043227,GO:0043229,GO:0043231,GO:0044237,GO:0044249,GO:0044271,GO:0044424,GO:…	ko:K01599
EXM10507.1	Ribosomal protein L35Ae		0	NO_SP	0	0	FALSE	FALSE	noTP	Cytoplasm	mito	Mitochondrial			Cytoplasmic effector	0			J	GO:0002181,GO:0003674,GO:0003676,GO:0003723,GO:0003735,GO:0005198,GO:0005488,GO:0005575,GO:0005622,GO:0005623,GO:0005737,GO:0005829,GO:0005840,GO:0006412,GO:0006518,GO:0006807,GO:0008150,GO:0008152,GO:0008270,GO:0009058,GO:0009059,GO:0009987,GO:0010467,GO:0015934,GO:0019538,GO:0019843,GO:0022613,GO:0022625,GO:0022626,GO:0032991,GO:0034641,GO:0034645,GO:0042254,GO:0042273,GO:0043043,GO:0043167,GO:…	ko:K02917
EXM10560.1	Belongs to the peroxidase family		0	NO_SP	1	1	FALSE	FALSE	mTP	Mitochondrion	mito	Membrane bound Mitochondrial		AA2	Non-effector	0	unaffected_pathogenicity		C	GO:0000302,GO:0003674,GO:0003824,GO:0004130,GO:0004601,GO:0005575,GO:0005622,GO:0005623,GO:0005737,GO:0005739,GO:0005740,GO:0005758,GO:0005829,GO:0006950,GO:0006979,GO:0008150,GO:0008152,GO:0009056,GO:0009636,GO:0009987,GO:0016209,GO:0016491,GO:0016684,GO:0016999,GO:0017001,GO:0017144,GO:0031967,GO:0031970,GO:0031974,GO:0031975,GO:0033554,GO:0034599,GO:0034614,GO:0042221,GO:0042737,GO:0042743,GO:…	ko:K00428
EXM10573.1	Belongs to the eukaryotic ribosomal protein eL36 family		0	NO_SP	0	0	FALSE	FALSE	noTP	Cytoplasm	mito	Nuclear			Cytoplasmic effector	0			J	GO:0002181,GO:0003674,GO:0003676,GO:0003723,GO:0003735,GO:0005198,GO:0005488,GO:0005575,GO:0005622,GO:0005623,GO:0005737,GO:0005829,GO:0005840,GO:0006412,GO:0006518,GO:0006807,GO:0008150,GO:0008152,GO:0009058,GO:0009059,GO:0009987,GO:0010467,GO:0015934,GO:0019538,GO:0022625,GO:0022626,GO:0032991,GO:0034641,GO:0034645,GO:0043043,GO:0043170,GO:0043226,GO:0043228,GO:0043229,GO:0043232,GO:0043603,GO:…	ko:K02920
EXM10642.1	Region of unknown function (DUF2417)		0	NO_SP	5	5	FALSE	FALSE	noTP	Cell_membrane	plas	Plasma membrane	Classical_membrane		Non-effector	0			S	GO:0000322,GO:0000323,GO:0000324,GO:0000329,GO:0003674,GO:0003824,GO:0005575,GO:0005622,GO:0005623,GO:0005737,GO:0005773,GO:0005774,GO:0016020,GO:0016021,GO:0016787,GO:0031090,GO:0031166,GO:0031224,GO:0031300,GO:0031301,GO:0031310,GO:0043226,GO:0043227,GO:0043229,GO:0043231,GO:0044422,GO:0044424,GO:0044425,GO:0044437,GO:0044444,GO:0044446,GO:0044464,GO:0071627,GO:0071628,GO:0098588,GO:0098805,GO:…	-
EXM10650.1	SIS domain		0	NO_SP	0	0	FALSE	FALSE	noTP	Cytoplasm	plas	Cytoplasmic			Non-effector	0	lethal__loss_of_pathogenicity		M	GO:0000271,GO:0003674,GO:0003824,GO:0004360,GO:0005975,GO:0005976,GO:0006002,GO:0006022,GO:0006023,GO:0006030,GO:0006031,GO:0006037,GO:0006038,GO:0006040,GO:0006041,GO:0006042,GO:0006047,GO:0006139,GO:0006464,GO:0006486,GO:0006487,GO:0006725,GO:0006793,GO:0006796,GO:0006807,GO:0008150,GO:0008152,GO:0008483,GO:0009058,GO:0009059,GO:0009100,GO:0009101,GO:0009225,GO:0009272,GO:0009987,GO:0010383,GO:…	ko:K00820
EXM10730.1	Glutaredoxin	Y	0	NO_SP	1	1	FALSE	FALSE	noTP	Golgi_apparatus	extr	Endoplasmic reticulum			Cytoplasmic effector	0			O	GO:0003674,GO:0003824,GO:0005575,GO:0005622,GO:0005623,GO:0005634,GO:0005635,GO:0006790,GO:0006807,GO:0008150,GO:0008152,GO:0009987,GO:0010467,GO:0012505,GO:0015036,GO:0015037,GO:0015038,GO:0016020,GO:0016043,GO:0016226,GO:0016491,GO:0016667,GO:0019538,GO:0022607,GO:0031090,GO:0031163,GO:0031965,GO:0031967,GO:0031975,GO:0042175,GO:0043170,GO:0043226,GO:0043227,GO:0043229,GO:0043231,GO:0044085,GO:…	-
EXM10769.1	Belongs to the small heat shock protein (HSP20) family		0	NO_SP	0	0	FALSE	FALSE	noTP	Nucleus	nucl	Cytoplasmic			Cytoplasmic effector	0	reduced_virulence		O	-	-
EXM10782.1	The glycine cleavage system catalyzes the degradation of glycine		0	NO_SP	1	1	FALSE	FALSE	noTP	Extracellular	extr	Membrane bound Mitochondrial	Classical_membrane		Non-effector	0			E	GO:0001505,GO:0003674,GO:0003824,GO:0004047,GO:0005575,GO:0005622,GO:0005623,GO:0005737,GO:0005739,GO:0005960,GO:0006082,GO:0006520,GO:0006544,GO:0006546,GO:0006730,GO:0006807,GO:0008150,GO:0008152,GO:0008168,GO:0008483,GO:0009056,GO:0009063,GO:0009069,GO:0009071,GO:0009987,GO:0016054,GO:0016740,GO:0016741,GO:0016769,GO:0017144,GO:0019464,GO:0019752,GO:0032259,GO:0032991,GO:0042133,GO:0042135,GO:…	ko:K00605
EXM11016.1	ribosomal protein L35		0	NO_SP	0	0	FALSE	FALSE	noTP	Cytoplasm	nucl	Nuclear			Cytoplasmic effector	0			J	GO:0000463,GO:0000470,GO:0002181,GO:0003674,GO:0003676,GO:0003723,GO:0003729,GO:0003735,GO:0005198,GO:0005488,GO:0005575,GO:0005622,GO:0005623,GO:0005737,GO:0005829,GO:0005840,GO:0006139,GO:0006364,GO:0006396,GO:0006412,GO:0006518,GO:0006725,GO:0006807,GO:0008150,GO:0008152,GO:0009058,GO:0009059,GO:0009987,GO:0010467,GO:0015934,GO:0016070,GO:0016072,GO:0019538,GO:0022613,GO:0022625,GO:0022626,GO:…	ko:K02918
EXM11023.1	Belongs to the eukaryotic ribosomal protein eL6 family		0	NO_SP	0	0	FALSE	FALSE	noTP	Cytoplasm	nucl	Membrane bound Mitochondrial			Cytoplasmic effector	0			J	GO:0000027,GO:0002181,GO:0003674,GO:0003676,GO:0003723,GO:0003735,GO:0005198,GO:0005488,GO:0005575,GO:0005622,GO:0005623,GO:0005737,GO:0005829,GO:0005840,GO:0006412,GO:0006518,GO:0006807,GO:0006996,GO:0008150,GO:0008152,GO:0009058,GO:0009059,GO:0009987,GO:0010467,GO:0015934,GO:0016043,GO:0019538,GO:0022607,GO:0022613,GO:0022618,GO:0022625,GO:0022626,GO:0032991,GO:0034622,GO:0034641,GO:0034645,GO:…	ko:K02934
EXM11029.1	Belongs to the small GTPase superfamily. Arf family	Y	0	NO_SP	0	0	FALSE	FALSE	noTP	Golgi_apparatus	cyto_nucl	Golgi			Cytoplasmic effector	0	reduced_virulence		U	GO:0000166,GO:0001882,GO:0001883,GO:0003674,GO:0003824,GO:0003924,GO:0005488,GO:0005525,GO:0005575,GO:0005622,GO:0005623,GO:0005737,GO:0005794,GO:0005829,GO:0006810,GO:0006886,GO:0006888,GO:0006892,GO:0006893,GO:0006914,GO:0008104,GO:0008150,GO:0008152,GO:0009056,GO:0009987,GO:0012505,GO:0015031,GO:0015833,GO:0016192,GO:0016236,GO:0016462,GO:0016787,GO:0016817,GO:0016818,GO:0017076,GO:0017111,GO:…	ko:K07937,ko:K07977
EXM11035.1	Proteasome complex subunit Rpn13 ubiquitin receptor		0	NO_SP	0	0	FALSE	FALSE	noTP	Nucleus	cyto	Nuclear			Non-effector	0			S	GO:0000502,GO:0003674,GO:0005488,GO:0005515,GO:0005575,GO:0005622,GO:0005623,GO:0005838,GO:0006508,GO:0006511,GO:0006807,GO:0007088,GO:0007346,GO:0008047,GO:0008150,GO:0008152,GO:0008541,GO:0009056,GO:0009057,GO:0009893,GO:0009896,GO:0009987,GO:0010498,GO:0010564,GO:0010604,GO:0010638,GO:0010950,GO:0010952,GO:0010965,GO:0016504,GO:0019222,GO:0019538,GO:0019941,GO:0022624,GO:0030071,GO:0030162,GO:…	ko:K06691
EXM11036.1	Belongs to the EF-1-beta EF-1-delta family		0	NO_SP	0	0	FALSE	FALSE	noTP	Cytoplasm	cyto	Cytoplasmic			Non-effector	0			J	GO:0002181,GO:0002182,GO:0003674,GO:0003676,GO:0003723,GO:0003746,GO:0005085,GO:0005488,GO:0005515,GO:0005575,GO:0005622,GO:0005623,GO:0005737,GO:0005853,GO:0006412,GO:0006414,GO:0006417,GO:0006449,GO:0006518,GO:0006807,GO:0008135,GO:0008150,GO:0008152,GO:0009058,GO:0009059,GO:0009889,GO:0009987,GO:0010467,GO:0010468,GO:0010556,GO:0010608,GO:0010639,GO:0019222,GO:0019538,GO:0019899,GO:0031323,GO:…	ko:K03232
EXM11130.1	Endoribonuclease L-PSP		0	NO_SP	0	0	FALSE	FALSE	noTP	Cytoplasm	cysk	Cytoplasmic			Cytoplasmic effector	0			J	-	-
EXM11289.1	Belongs to the histidine acid phosphatase family		0	NO_SP	1	1	FALSE	FALSE	noTP	Lysosome/Vacuole	plas	Membrane bound Extracellular (Secreted)	Classical_membrane		Non-effector	0	reduced_virulence		S	GO:0003674,GO:0003824,GO:0003993,GO:0005575,GO:0005576,GO:0005618,GO:0005622,GO:0005623,GO:0005737,GO:0006066,GO:0006091,GO:0006112,GO:0006725,GO:0006766,GO:0006767,GO:0006772,GO:0006790,GO:0006793,GO:0006796,GO:0006807,GO:0006950,GO:0007154,GO:0008150,GO:0008152,GO:0009056,GO:0009058,GO:0009110,GO:0009228,GO:0009267,GO:0009277,GO:0009605,GO:0009987,GO:0009991,GO:0015980,GO:0016020,GO:0016036,GO:…	ko:K01078
EXM11323.1	-	Y	0	NO_SP	0	0	FALSE	FALSE	noTP	Cytoplasm	nucl	Extracellular (Secreted)			Non-effector	0			-	-	-
EXM11374.1	Inorganic pyrophosphatase		0	NO_SP	0	0	FALSE	FALSE	mTP	Mitochondrion	mito	Mitochondrial			Non-effector	0	lethal		C	GO:0003674,GO:0003824,GO:0004427,GO:0005575,GO:0005576,GO:0005618,GO:0005622,GO:0005623,GO:0005634,GO:0005737,GO:0005829,GO:0006793,GO:0006796,GO:0006950,GO:0006970,GO:0008150,GO:0008152,GO:0009277,GO:0009628,GO:0009987,GO:0016462,GO:0016787,GO:0016817,GO:0016818,GO:0030312,GO:0030446,GO:0031012,GO:0033554,GO:0043226,GO:0043227,GO:0043229,GO:0043231,GO:0044237,GO:0044421,GO:0044424,GO:0044444,GO:…	ko:K01507
EXM11443.1	LSM domain	Y	0	NO_SP	0	0	FALSE	FALSE	noTP	Cytoplasm	cysk	Cytoplasmic			Cytoplasmic/apoplastic effector	0			A	GO:0000375,GO:0000377,GO:0000398,GO:0000932,GO:0003674,GO:0003676,GO:0003723,GO:0003727,GO:0005488,GO:0005575,GO:0005622,GO:0005623,GO:0005634,GO:0005688,GO:0005730,GO:0005732,GO:0005737,GO:0006139,GO:0006364,GO:0006396,GO:0006397,GO:0006725,GO:0006807,GO:0008150,GO:0008152,GO:0008187,GO:0008266,GO:0008380,GO:0009987,GO:0010467,GO:0016070,GO:0016071,GO:0016072,GO:0022613,GO:0030490,GO:0030532,GO:…	ko:K12625
EXM11680.1	Saccharopine dehydrogenase C-terminal domain		0	NO_SP	0	0	FALSE	FALSE	noTP	Cytoplasm	cyto	Mitochondrial			Non-effector	0	lethal		E	GO:0003674,GO:0003824,GO:0004753,GO:0004755,GO:0005575,GO:0005622,GO:0005623,GO:0005737,GO:0006082,GO:0006091,GO:0006520,GO:0006553,GO:0006807,GO:0008150,GO:0008152,GO:0008652,GO:0009058,GO:0009066,GO:0009067,GO:0009085,GO:0009987,GO:0016053,GO:0016491,GO:0016645,GO:0016646,GO:0019752,GO:0019878,GO:0043436,GO:0044237,GO:0044238,GO:0044249,GO:0044281,GO:0044283,GO:0044424,GO:0044464,GO:0046394,GO:…	ko:K00293,ko:K00797
EXM11833.1	Belongs to the eukaryotic ribosomal protein eL15 family		0	NO_SP	0	0	FALSE	FALSE	noTP	Nucleus	nucl	Nuclear			Cytoplasmic effector	0			J	GO:0002181,GO:0003674,GO:0003676,GO:0003723,GO:0003735,GO:0005198,GO:0005488,GO:0005575,GO:0005622,GO:0005623,GO:0005634,GO:0005730,GO:0005737,GO:0005829,GO:0005840,GO:0006412,GO:0006518,GO:0006807,GO:0006914,GO:0008150,GO:0008152,GO:0009056,GO:0009058,GO:0009059,GO:0009987,GO:0010467,GO:0015934,GO:0016236,GO:0019538,GO:0022625,GO:0022626,GO:0031974,GO:0031981,GO:0032991,GO:0034641,GO:0034645,GO:…	ko:K02877
EXM11870.1	Raffinose synthase or seed imbibition protein Sip1	Y	0	NO_SP	0	0	FALSE	FALSE	noTP	Cytoplasm	cyto	Cytoplasmic		GH36	Non-effector	0			S	-	-
EXM12009.1	Belongs to the flavoprotein pyridine nucleotide cytochrome reductase family		0	NO_SP	1	0	FALSE	FALSE	mTP	Mitochondrion	mito	Membrane bound Mitochondrial			Non-effector	0	reduced_virulence		C	GO:0003674,GO:0003824,GO:0004128,GO:0005575,GO:0005622,GO:0005623,GO:0005737,GO:0005739,GO:0005740,GO:0005741,GO:0005758,GO:0006066,GO:0006629,GO:0006694,GO:0006696,GO:0006950,GO:0006979,GO:0008150,GO:0008152,GO:0008202,GO:0008204,GO:0008610,GO:0009058,GO:0009987,GO:0016020,GO:0016021,GO:0016125,GO:0016126,GO:0016128,GO:0016129,GO:0016491,GO:0016651,GO:0016653,GO:0019867,GO:0031090,GO:0031224,GO:…	ko:K00326
EXM12113.1	Belongs to the eukaryotic ribosomal protein eS6 family	Y	0	NO_SP	0	0	FALSE	FALSE	noTP	Cytoplasm	nucl	Membrane bound Mitochondrial			Cytoplasmic effector	0			J	GO:0000462,GO:0002181,GO:0003674,GO:0003735,GO:0005198,GO:0005575,GO:0005622,GO:0005623,GO:0005737,GO:0005829,GO:0005840,GO:0006139,GO:0006364,GO:0006396,GO:0006412,GO:0006518,GO:0006725,GO:0006807,GO:0008150,GO:0008152,GO:0009058,GO:0009059,GO:0009987,GO:0010467,GO:0015935,GO:0016070,GO:0016072,GO:0019538,GO:0022613,GO:0022626,GO:0022627,GO:0030490,GO:0030684,GO:0030686,GO:0032040,GO:0032991,GO:…	ko:K02991
EXM12196.1	Belongs to the universal ribosomal protein uS17 family		0	NO_SP	0	0	FALSE	FALSE	noTP	Cytoplasm	mito	Cytoplasmic			Cytoplasmic effector	0	unaffected_pathogenicity		J	GO:0000028,GO:0000462,GO:0002181,GO:0003674,GO:0003735,GO:0005198,GO:0005575,GO:0005622,GO:0005623,GO:0005737,GO:0005829,GO:0005840,GO:0006139,GO:0006364,GO:0006396,GO:0006412,GO:0006518,GO:0006725,GO:0006807,GO:0006996,GO:0008150,GO:0008152,GO:0009058,GO:0009059,GO:0009987,GO:0010467,GO:0015935,GO:0016043,GO:0016070,GO:0016072,GO:0019538,GO:0022607,GO:0022613,GO:0022618,GO:0022626,GO:0022627,GO:…	ko:K02949
EMT74428.1	Belongs to the glycosyl hydrolase 12 (cellulase H) family		0	SP	0	1	FALSE	TRUE	SP	Cell_membrane	extr	Golgi	Classical_membrane	GH12	Non-effector	0	effector_(plant_avirulence_determinant)		G	-	-
ENH60796.1	histone H2A-H2B dimer displacement	Y	0	NO_SP	0	0	FALSE	FALSE	noTP	Nucleus	nucl	Nuclear			Non-effector	0	reduced_virulence		KL	-	-
ENH61807.1	WD40 repeats		0	NO_SP	0	0	FALSE	FALSE	noTP	Nucleus	nucl	Nuclear			Non-effector	0	reduced_virulence		S	GO:0005575,GO:0005622,GO:0005623,GO:0005634,GO:0005737,GO:0006355,GO:0006464,GO:0006508,GO:0006807,GO:0007154,GO:0007584,GO:0008150,GO:0008152,GO:0009605,GO:0009889,GO:0009890,GO:0009892,GO:0009987,GO:0009991,GO:0010468,GO:0010556,GO:0010558,GO:0010605,GO:0010629,GO:0016579,GO:0019219,GO:0019222,GO:0019538,GO:0030428,GO:0031323,GO:0031324,GO:0031326,GO:0031327,GO:0031667,GO:0031668,GO:0031669,GO:…	-
ENH62229.1	Major Facilitator Superfamily	Y	0	SP	8	9	FALSE	FALSE	SP	Cell_membrane	plas	Plasma membrane	Classical_membrane		Non-effector	0	unaffected_pathogenicity		G	-	ko:K03448
ENH62376.1	proline rich protein	Y	0	SP	0	0	FALSE	FALSE	SP	Extracellular	extr	Membrane bound Lysosomal	Classical_secreted		Non-effector	0	reduced_virulence		S	-	-
ENH62620.1	Cell surface protein		0	NO_SP	0	0	FALSE	FALSE	noTP	Cytoplasm	nucl	Cytoplasmic			Cytoplasmic effector	0	unaffected_pathogenicity__reduced_virulence		S	-	-
ENH62846.1	Belongs to the glycosyl hydrolase 12 (cellulase H) family		0	SP	0	1	FALSE	TRUE	SP	Cell_membrane	extr	Extracellular (Secreted)	Classical_membrane	GH12	Non-effector	0	effector_(plant_avirulence_determinant)		G	-	-
ENH63649.1	-	Y	0	SP	0	0	FALSE	FALSE	SP	Extracellular	extr	Extracellular (Secreted)	Classical_secreted		Non-effector	0			-	-	-
ENH64105.1	Metallopeptidase family M24	Y	0	NO_SP	0	0	FALSE	FALSE	noTP	Cytoplasm	mito	Cytoplasmic			Non-effector	0			E	-	-
ENH65162.1	N2227	Y	0	SP	0	0	FALSE	FALSE	SP	Extracellular	nucl	Membrane bound Extracellular (Secreted)	Classical_secreted		Non-effector	0			G	-	ko:K19787
ENH65231.1	Putative DNA-binding (bihelical) motif predicted to be involved in chromosomal organisation		0	NO_SP	0	0	FALSE	FALSE	noTP	Nucleus	nucl	Nuclear			Cytoplasmic effector	0			D	-	ko:K18732
ENH66301.1	-	Y	0	NO_SP	0	0	FALSE	FALSE	noTP	Cytoplasm	cyto	Cytoplasmic			Non-effector	0			-	-	-
ENH70599.1	-	Y	0	SP	1	1	FALSE	FALSE	SP	Cell_membrane	extr	Plasma membrane	Classical_membrane		Non-effector	0	reduced_virulence__loss_of_pathogenicity__unaffected_pathogenicity		-	-	-
ENH71498.1	SPRY domain	Y	0	NO_SP	0	0	FALSE	FALSE	noTP	Cytoplasm	cyto	Cytoplasmic			Non-effector	0	unaffected_pathogenicity		M	-	-
ENH72274.1	Common central domain of tyrosinase	Y	0	NO_SP	0	0	FALSE	FALSE	noTP	Plastid	mito	Membrane bound Vacuolar			Non-effector	0			E	-	ko:K00505
ENH72400.1	Adventurous gliding protein z		0	NO_SP	0	0	FALSE	FALSE	noTP	Golgi_apparatus	nucl	Nuclear			Cytoplasmic effector	0			W	-	-
ENH72952.1	Heavy-metal-associated domain		0	NO_SP	0	0	FALSE	FALSE	noTP	Cytoplasm	cyto	Cytoplasmic			Cytoplasmic/apoplastic effector	0			P	GO:0000041,GO:0003674,GO:0005488,GO:0005507,GO:0005575,GO:0005622,GO:0005623,GO:0005737,GO:0005829,GO:0006810,GO:0006811,GO:0006812,GO:0006825,GO:0006873,GO:0006875,GO:0006878,GO:0006879,GO:0006950,GO:0006979,GO:0008150,GO:0009987,GO:0015680,GO:0016530,GO:0016531,GO:0019725,GO:0030001,GO:0030003,GO:0033554,GO:0034599,GO:0042221,GO:0042592,GO:0043167,GO:0043169,GO:0044424,GO:0044444,GO:0044464,GO:…	ko:K07213
ENH75843.1	-	Y	0	NO_SP	0	1	FALSE	FALSE	noTP	Peroxisome	plas	Membrane bound Mitochondrial			Non-effector	0	unaffected_pathogenicity__reduced_virulence		-	-	-
EXL89921.1	-		0	SP	0	0	FALSE	FALSE	SP	Extracellular	extr	Membrane bound Extracellular (Secreted)	Classical_secreted		Apoplastic effector	0		Y	-	-	-
EXL89949.1	Multicopper oxidase	Y	0	SP	0	1	FALSE	TRUE	SP	Cell_membrane	extr	Membrane bound Endoplasmic reticulum	Classical_membrane	AA1_3	Non-effector	0	reduced_virulence		Q	-	-
EXL90139.1	Belongs to the tannase family		0	SP	0	0	FALSE	FALSE	SP	Extracellular	extr	Extracellular (Secreted)	Classical_secreted		Non-effector	0	unaffected_pathogenicity		G	-	ko:K09252
EXL90227.1	-		0	SP	0	0	FALSE	FALSE	noTP	Extracellular	cyto_nucl	Extracellular (Secreted)	Classical_secreted		Apoplastic/cytoplasmic effector	0		Y	-	-	-
EXL90285.1	DegT/DnrJ/EryC1/StrS aminotransferase family		0	NO_SP	0	0	FALSE	FALSE	noTP	Peroxisome	cyto	Cytoplasmic			Non-effector	0	unaffected_pathogenicity		E	GO:0000096,GO:0000097,GO:0003674,GO:0003824,GO:0003961,GO:0004124,GO:0005575,GO:0005622,GO:0005623,GO:0005737,GO:0005886,GO:0006082,GO:0006520,GO:0006534,GO:0006535,GO:0006555,GO:0006563,GO:0006790,GO:0006807,GO:0008150,GO:0008152,GO:0008652,GO:0009058,GO:0009066,GO:0009067,GO:0009069,GO:0009070,GO:0009086,GO:0009987,GO:0016020,GO:0016053,GO:0016740,GO:0016765,GO:0017144,GO:0019344,GO:0019752,GO:…	ko:K17069
EXL90303.1	FMN binding		0	NO_SP	0	0	FALSE	FALSE	noTP	Peroxisome	cyto	Membrane bound Peroxisomal			Non-effector	0	unaffected_pathogenicity		C	-	ko:K11517
EXL90554.1	Metallopeptidase family M24	Y	0	NO_SP	0	0	FALSE	FALSE	noTP	Cytoplasm	cyto	Cytoplasmic			Cytoplasmic effector	0			S	-	-
EXL90615.1	to voltage-gated potassium channel beta-2 subunit		0	NO_SP	0	0	FALSE	FALSE	noTP	Cytoplasm	cyto	Cytoplasmic			Non-effector	0	reduced_virulence		C	GO:0006810,GO:0006811,GO:0006812,GO:0006813,GO:0008150,GO:0009987,GO:0015672,GO:0030001,GO:0034220,GO:0051179,GO:0051234,GO:0055085,GO:0071804,GO:0071805,GO:0098655,GO:0098660,GO:0098662	-
EXL90824.1	Belongs to the phosphoglycerate mutase family. BPG- dependent PGAM subfamily	Y	0	NO_SP	0	0	FALSE	FALSE	noTP	Mitochondrion	mito	Mitochondrial			Non-effector	0			G	GO:0003674,GO:0003824,GO:0004619,GO:0005575,GO:0005576,GO:0005618,GO:0005622,GO:0005623,GO:0005737,GO:0005739,GO:0005740,GO:0005758,GO:0005829,GO:0005975,GO:0005996,GO:0006006,GO:0006007,GO:0006082,GO:0006090,GO:0006091,GO:0006094,GO:0006096,GO:0006109,GO:0006139,GO:0006140,GO:0006163,GO:0006164,GO:0006165,GO:0006725,GO:0006732,GO:0006733,GO:0006734,GO:0006735,GO:0006753,GO:0006754,GO:0006757,GO:…	ko:K01834
EXL90904.1	Catalytic subunit of the molybdopterin synthase complex, a complex that catalyzes the conversion of precursor Z into molybdopterin. Acts by mediating the incorporation of 2 sulfur atoms from thiocarboxylated MOCS2A into precursor Z to generate a dithiolene group	Y	0	NO_SP	0	0	FALSE	FALSE	noTP	Cytoplasm	cysk	Cytoplasmic			Cytoplasmic effector	0			H	GO:0003674,GO:0003824,GO:0005575,GO:0005622,GO:0005623,GO:0005737,GO:0005829,GO:0006139,GO:0006163,GO:0006725,GO:0006732,GO:0006753,GO:0006793,GO:0006796,GO:0006807,GO:0008150,GO:0008152,GO:0009058,GO:0009116,GO:0009117,GO:0009119,GO:0009141,GO:0009144,GO:0009150,GO:0009199,GO:0009205,GO:0009259,GO:0009987,GO:0016740,GO:0016782,GO:0016783,GO:0018130,GO:0019538,GO:0019637,GO:0019693,GO:0030366,GO:…	ko:K03635
EXL90911.1	Glycosyl hydrolases family 18		0	NO_SP	0	1	FALSE	TRUE	noTP	Cell_membrane	extr	Plasma membrane	Classical_membrane	GH18|CBM19	Non-effector	0	unaffected_pathogenicity		G	GO:0000272,GO:0000278,GO:0000281,GO:0000282,GO:0000322,GO:0000323,GO:0000324,GO:0000910,GO:0000920,GO:0001896,GO:0003674,GO:0003824,GO:0004553,GO:0004568,GO:0005488,GO:0005575,GO:0005576,GO:0005618,GO:0005622,GO:0005623,GO:0005634,GO:0005635,GO:0005737,GO:0005773,GO:0005783,GO:0005933,GO:0005935,GO:0005975,GO:0005976,GO:0006022,GO:0006026,GO:0006030,GO:0006032,GO:0006037,GO:0006039,GO:0006040,GO:…	ko:K01183
EXL90926.1	Vacuolar ATP synthase subunit E		0	NO_SP	0	0	FALSE	FALSE	noTP	Cytoplasm	nucl	Cytoplasmic			Cytoplasmic effector	0	loss_of_pathogenicity		C	GO:0000221,GO:0000322,GO:0000323,GO:0000324,GO:0000329,GO:0003674,GO:0003824,GO:0005215,GO:0005575,GO:0005622,GO:0005623,GO:0005737,GO:0005773,GO:0005774,GO:0006810,GO:0006811,GO:0006812,GO:0006873,GO:0006885,GO:0007035,GO:0008150,GO:0008324,GO:0009987,GO:0015075,GO:0015077,GO:0015078,GO:0015318,GO:0015399,GO:0015405,GO:0015672,GO:0015988,GO:0015991,GO:0016020,GO:0016021,GO:0016462,GO:0016469,GO:…	ko:K02150
EXL91169.1	Belongs to the peptidase A1 family		0	SP	0	0	FALSE	FALSE	SP	Extracellular	extr	Membrane bound Extracellular (Secreted)	Classical_secreted		Non-effector	0	unaffected_pathogenicity		O	-	ko:K01381
EXL91198.1	Fungal specific transcription factor domain	Y	0	NO_SP	0	1	FALSE	FALSE	noTP	Nucleus	nucl	Membrane bound Endoplasmic reticulum			Non-effector	0	reduced_virulence		K	-	-
EXL91299.1	Fibronectin type III-like domain	Y	0	NO_SP	0	0	FALSE	FALSE	noTP	Cytoplasm	cysk	Cytoplasmic		GH3	Non-effector	0	reduced_virulence		G	-	ko:K05349
EXL91351.1	-	Y	0	NO_SP	0	0	FALSE	FALSE	noTP	Cytoplasm	cyto	Nuclear			Cytoplasmic effector	0			-	-	-
EXL91656.1	to dienelactone hydrolase		0	NO_SP	0	0	FALSE	FALSE	noTP	Cytoplasm	cyto	Cytoplasmic			Cytoplasmic effector	0			Q	-	-
EXL91683.1	Zinc carboxypeptidase		0	SP	0	0	FALSE	FALSE	SP	Mitochondrion	mito	Mitochondrial			Non-effector	0			O	-	-
EXL91688.1	acid oxidase	Y	0	NO_SP	0	0	FALSE	FALSE	mTP	Plastid	mito	Cytoplasmic			Non-effector	0			E	-	ko:K00306
EXL91735.1	Glycosyl hydrolase family 20, catalytic domain		0	NO_SP	0	0	FALSE	FALSE	noTP	Lysosome/Vacuole	cyto	Mitochondrial		GH20	Cytoplasmic effector	0	reduced_virulence		G	-	ko:K12373
EXL91750.1	to isochorismatase family hydrolase	Y	0	NO_SP	0	0	FALSE	FALSE	noTP	Cytoplasm	cyto	Cytoplasmic			Cytoplasmic effector	0			Q	-	-
EXL91761.1	Maltose acetyltransferase		0	NO_SP	0	0	FALSE	FALSE	noTP	Cytoplasm	cyto	Cytoplasmic			Non-effector	0	reduced_virulence		E	GO:0003674,GO:0003824,GO:0005575,GO:0006082,GO:0006520,GO:0006563,GO:0006807,GO:0008150,GO:0008152,GO:0008374,GO:0008870,GO:0009001,GO:0009069,GO:0009987,GO:0016020,GO:0016407,GO:0016412,GO:0016413,GO:0016740,GO:0016746,GO:0016747,GO:0019752,GO:0043436,GO:0044237,GO:0044238,GO:0044281,GO:0071704,GO:1901564,GO:1901605	-
EXL91874.1	-	Y	0	SP	0	0	FALSE	TRUE	SP	Cell_membrane	extr	Membrane bound Extracellular (Secreted)	Classical_membrane		Apoplastic effector	0			-	-	-
EXL91879.1	to succinate-semialdehyde dehydrogenase		0	NO_SP	0	0	FALSE	FALSE	noTP	Cytoplasm	cyto	Membrane bound Mitochondrial			Non-effector	0	reduced_virulence		C	-	ko:K00139
EXL91931.1	Pyrroline-5-carboxylate reductase		0	NO_SP	0	0	FALSE	FALSE	noTP	Peroxisome	cyto	Cytoplasmic			Non-effector	0			E	-	ko:K00286
EXL92005.1	Uncharacterized alpha/beta hydrolase domain (DUF2235)	Y	0	NO_SP	0	0	FALSE	FALSE	noTP	Peroxisome	cyto_nucl	Cytoplasmic			Non-effector	0			S	-	-
EXL92061.1	Chaperone protein hchA	Y	0	NO_SP	0	0	FALSE	FALSE	noTP	Cytoplasm	cyto	Membrane bound Golgi			Non-effector	0			S	-	-
EXL92063.1	Belongs to the lyase 1 family. Adenylosuccinate lyase subfamily		0	NO_SP	0	0	FALSE	FALSE	noTP	Cytoplasm	mito	Membrane bound Mitochondrial			Non-effector	0	reduced_virulence		F	-	ko:K01756
EXL92194.1	Belongs to the peptidase M36 family	Y	0	SP	0	0	FALSE	FALSE	SP	Extracellular	extr	Membrane bound Extracellular (Secreted)	Classical_secreted		Non-effector	0	unaffected_pathogenicity		O	GO:0005575,GO:0005576	ko:K01417
EXL92223.1	-	Y	0	NO_SP	0	0	FALSE	FALSE	noTP	Cytoplasm	cyto_nucl	Cytoplasmic			Non-effector	0			-	-	-
EXL92232.1	-	Y	0	SP	1	1	FALSE	FALSE	SP	Cell_membrane	extr	Plasma membrane	Classical_membrane		Non-effector	0			-	-	-
EXL92287.1	TAP-like protein		0	SP	0	0	FALSE	FALSE	noTP	Peroxisome	extr	Membrane bound Mitochondrial			Non-effector	0			S	-	-
EXL92376.1	Occurs in almost all aerobically respiring organisms and serves to protect cells from the toxic effects of hydrogen peroxide	Y	0	NO_SP	0	0	FALSE	FALSE	noTP	Cytoplasm	cyto_nucl	Peroxisomal			Non-effector	0	reduced_virulence__unaffected_pathogenicity		Q	GO:0000302,GO:0001306,GO:0001315,GO:0003674,GO:0003824,GO:0004096,GO:0004601,GO:0005488,GO:0005575,GO:0005618,GO:0005622,GO:0005623,GO:0005737,GO:0005739,GO:0005759,GO:0005777,GO:0005782,GO:0006950,GO:0006979,GO:0007154,GO:0007568,GO:0007571,GO:0008150,GO:0008152,GO:0009056,GO:0009267,GO:0009277,GO:0009405,GO:0009605,GO:0009636,GO:0009987,GO:0009991,GO:0010035,GO:0016209,GO:0016491,GO:0016684,GO:…	ko:K03781
EXL92377.1	Mo-co oxidoreductase dimerisation domain	Y	0	NO_SP	0	0	FALSE	FALSE	noTP	Cytoplasm	cyto	Cytoplasmic			Non-effector	0	unaffected_pathogenicity		C	-	ko:K00387
EXL92424.1	Oxidoreductase family, NAD-binding Rossmann fold		0	NO_SP	0	0	FALSE	FALSE	noTP	Cytoplasm	cyto	Cytoplasmic			Non-effector	0	reduced_virulence		S	-	-
EXL92454.1	3-beta hydroxysteroid dehydrogenase/isomerase family		0	NO_SP	0	0	FALSE	FALSE	mTP	Mitochondrion	mito	Membrane bound Mitochondrial			Non-effector	0			C	GO:0003674,GO:0003824,GO:0003954,GO:0005575,GO:0005622,GO:0005623,GO:0005737,GO:0005739,GO:0005759,GO:0006732,GO:0006733,GO:0006743,GO:0006744,GO:0008150,GO:0008152,GO:0009058,GO:0009108,GO:0009987,GO:0016491,GO:0016651,GO:0031974,GO:0042180,GO:0042181,GO:0043226,GO:0043227,GO:0043229,GO:0043231,GO:0043233,GO:0044237,GO:0044249,GO:0044281,GO:0044283,GO:0044422,GO:0044424,GO:0044429,GO:0044444,GO:…	ko:K03953
EXL92455.1	to proteasome regulatory particle subunit RpnI		0	NO_SP	0	0	FALSE	FALSE	noTP	Cytoplasm	nucl	Cytoplasmic			Non-effector	0			O	GO:0000502,GO:0003674,GO:0005198,GO:0005575,GO:0005622,GO:0005623,GO:0005634,GO:0005737,GO:0005829,GO:0005838,GO:0006508,GO:0006511,GO:0006807,GO:0007088,GO:0007346,GO:0008150,GO:0008152,GO:0008541,GO:0009056,GO:0009057,GO:0009896,GO:0009987,GO:0010498,GO:0010564,GO:0010638,GO:0010965,GO:0016043,GO:0019538,GO:0019941,GO:0022607,GO:0022624,GO:0030071,GO:0030163,GO:0031331,GO:0031597,GO:0032270,GO:…	ko:K03039
EXL92458.1	Belongs to the aconitase IPM isomerase family		0	NO_SP	0	0	FALSE	FALSE	mTP	Mitochondrion	mito	Membrane bound Mitochondrial			Non-effector	0	loss_of_pathogenicity__lethal		CE	GO:0000002,GO:0003674,GO:0003676,GO:0003677,GO:0003690,GO:0003697,GO:0003824,GO:0003994,GO:0005488,GO:0005575,GO:0005576,GO:0005622,GO:0005623,GO:0005737,GO:0005739,GO:0005759,GO:0005829,GO:0006082,GO:0006091,GO:0006099,GO:0006101,GO:0006520,GO:0006536,GO:0006807,GO:0006996,GO:0007005,GO:0008150,GO:0008152,GO:0009060,GO:0009064,GO:0009295,GO:0009605,GO:0009607,GO:0009987,GO:0015980,GO:0016043,GO:…	ko:K01681
EXL92467.1	Ran-interacting Mog1 protein		0	NO_SP	0	0	FALSE	FALSE	noTP	Cytoplasm	cysk	Cytoplasmic			Cytoplasmic effector	0			T	GO:0003674,GO:0005488,GO:0005515,GO:0005575,GO:0005622,GO:0005623,GO:0005634,GO:0006606,GO:0006810,GO:0006886,GO:0006913,GO:0008104,GO:0008150,GO:0008536,GO:0015031,GO:0015833,GO:0017016,GO:0017038,GO:0019899,GO:0031267,GO:0033036,GO:0033365,GO:0034504,GO:0034613,GO:0042886,GO:0043226,GO:0043227,GO:0043229,GO:0043231,GO:0044424,GO:0044464,GO:0045184,GO:0046907,GO:0051020,GO:0051169,GO:0051170,GO:…	-
EXL92506.1	to alpha,alpha-trehalose-phosphate synthase subunit TPS2	Y	0	NO_SP	0	0	FALSE	FALSE	noTP	Cytoplasm	nucl	Cytoplasmic		GT20	Non-effector	0	reduced_virulence		G	-	ko:K16055
EXL92540.1	to phosphatidyl synthase		0	NO_SP	0	0	FALSE	FALSE	noTP	Cytoplasm	nucl	Cytoplasmic			Non-effector	0			G	-	-
EXL92541.1	Aldo/keto reductase family		0	NO_SP	0	0	FALSE	FALSE	noTP	Cytoplasm	cyto	Cytoplasmic			Non-effector	0	unaffected_pathogenicity		S	-	-
EXL92584.1	Haloacid dehalogenase-like hydrolase	Y	0	NO_SP	0	0	FALSE	FALSE	noTP	Cytoplasm	nucl	Cytoplasmic			Non-effector	0			S	-	-
EXL92619.1	Phenolic acid decarboxylase (PAD)	Y	0	NO_SP	0	0	FALSE	FALSE	noTP	Cytoplasm	cyto	Cytoplasmic			Cytoplasmic effector	0			S	-	-
EXL92621.1	cytochrome P-450		0	NO_SP	0	1	FALSE	FALSE	mTP	Mitochondrion	mito	Membrane bound Mitochondrial			Non-effector	0	reduced_virulence		Q	-	ko:K15877
EXL92672.1	to phosphorylcholine phosphatase		0	SP	0	0	FALSE	FALSE	SP	Extracellular	mito	Membrane bound Mitochondrial	Classical_secreted		Non-effector	0	reduced_virulence		S	-	ko:K21830
EXL92679.1	-		0	SP	0	0	FALSE	TRUE	SP	Cell_membrane	extr	Membrane bound Extracellular (Secreted)	Classical_membrane		Non-effector	0			-	-	-
EXL92694.1	KR domain	Y	0	NO_SP	0	0	FALSE	FALSE	noTP	Cytoplasm	cyto	Membrane bound Mitochondrial			Non-effector	0	increased_virulence_(hypervirulence)		Q	-	-
EXL92708.1	Dyp-type peroxidase family		0	NO_SP	0	0	FALSE	FALSE	mTP	Plastid	mito	Membrane bound Mitochondrial			Non-effector	0			E	-	ko:K07223
EXL92710.1	D-mannonate oxidoreductase		0	NO_SP	0	0	FALSE	FALSE	noTP	Cytoplasm	cyto	Cytoplasmic			Non-effector	0	unaffected_pathogenicity		E	GO:0000166,GO:0003674,GO:0003824,GO:0005488,GO:0005575,GO:0005576,GO:0005975,GO:0006059,GO:0006066,GO:0008150,GO:0008152,GO:0009987,GO:0016491,GO:0016614,GO:0016616,GO:0019400,GO:0019594,GO:0019751,GO:0031320,GO:0036094,GO:0044237,GO:0044238,GO:0044262,GO:0044281,GO:0046029,GO:0048037,GO:0050086,GO:0050661,GO:0050662,GO:0051287,GO:0055114,GO:0071704,GO:0097159,GO:1901265,GO:1901363,GO:1901615	ko:K00045
EXL92732.1	RNA recognition motif		0	NO_SP	0	0	FALSE	FALSE	SP	Mitochondrion	mito	Extracellular (Secreted)	Non-classical_secreted		Cytoplasmic effector	0	lethal	Y	A	-	-
EXL92775.1	Mannan endo-1,6-alpha-mannosidase	Y	0	SP	0	0	FALSE	TRUE	SP	Cell_membrane	extr	Membrane bound Mitochondrial	Classical_membrane	GH76	Non-effector	0			G	-	ko:K08257
EXL92884.1	glutathione transferase activity		0	NO_SP	0	0	FALSE	FALSE	noTP	Cytoplasm	cyto	Cytoplasmic			Cytoplasmic effector	0			O	-	-
EXL92889.1	Polyketide cyclase / dehydrase and lipid transport		0	NO_SP	0	0	FALSE	FALSE	noTP	Cytoplasm	cyto	Extracellular (Secreted)			Cytoplasmic effector	0			S	-	-
EXL93007.1	Fungal specific transcription factor domain	Y	0	NO_SP	0	0	FALSE	FALSE	noTP	Nucleus	nucl	Membrane bound Mitochondrial			Non-effector	0	unaffected_pathogenicity		K	-	-
EXL93022.1	Belongs to the peptidase S8 family	Y	0	SP	1	1	FALSE	FALSE	SP	Cell_membrane	extr	Plasma membrane	Classical_membrane		Non-effector	0	reduced_virulence		O	GO:0000139,GO:0000322,GO:0000323,GO:0000324,GO:0003674,GO:0003824,GO:0004175,GO:0004252,GO:0004857,GO:0004866,GO:0004867,GO:0005488,GO:0005515,GO:0005575,GO:0005622,GO:0005623,GO:0005737,GO:0005773,GO:0005794,GO:0005802,GO:0006508,GO:0006807,GO:0007323,GO:0008150,GO:0008152,GO:0008233,GO:0008236,GO:0009892,GO:0009986,GO:0010466,GO:0010467,GO:0010605,GO:0010951,GO:0012505,GO:0016020,GO:0016485,GO:…	ko:K01341
EXL93064.1	-		0	NO_SP	1	0	FALSE	FALSE	noTP	Cytoplasm	cyto	Golgi			Cytoplasmic effector	0			-	-	-
EXL93167.1	WSC domain		0	SP	1	1	FALSE	TRUE	SP	Cell_membrane	extr	Plasma membrane	Classical_membrane		Non-effector	0			S	-	-
EXL93177.1	-	Y	0	NO_SP	0	0	FALSE	FALSE	noTP	Cytoplasm	cyto	Cytoplasmic			Non-effector	0			-	-	-
EXL93194.1	Glucose sorbosone dehydrogenase		0	SP	0	1	FALSE	TRUE	SP	Cell_membrane	extr	Golgi	Classical_membrane	AA12	Non-effector	0	reduced_virulence		G	-	-
EXL93317.1	Fasciclin domain	Y	0	SP	0	0	FALSE	TRUE	SP	Cell_membrane	extr	Cytoplasmic	Classical_membrane		Non-effector	0	reduced_virulence		S	-	-
EXL93339.1	KR domain		0	NO_SP	0	0	FALSE	FALSE	noTP	Cytoplasm	cyto	Cytoplasmic			Non-effector	0	unaffected_pathogenicity		Q	-	ko:K17742
EXL93382.1	-		0	SP	1	0	FALSE	TRUE	SP	Cell_membrane	extr	Extracellular (Secreted)	Classical_membrane		Non-effector	0			-	-	-
EXL93403.1	3-beta hydroxysteroid dehydrogenase/isomerase family	Y	0	NO_SP	0	0	FALSE	FALSE	noTP	Cytoplasm	cyto	Mitochondrial			Non-effector	0	reduced_virulence		V	GO:0003674,GO:0003824,GO:0004029,GO:0004090,GO:0005575,GO:0005576,GO:0005622,GO:0005623,GO:0005634,GO:0005737,GO:0006066,GO:0006081,GO:0006082,GO:0006090,GO:0006629,GO:0006725,GO:0008150,GO:0008152,GO:0008202,GO:0008204,GO:0009438,GO:0009987,GO:0010033,GO:0014070,GO:0016125,GO:0016128,GO:0016491,GO:0016614,GO:0016616,GO:0016620,GO:0016903,GO:0018455,GO:0019752,GO:0030447,GO:0031012,GO:0032787,GO:…	ko:K17741
EXL93405.1	DJ-1/PfpI family	Y	0	NO_SP	0	0	FALSE	FALSE	noTP	Cytoplasm	cyto	Cytoplasmic			Non-effector	0	loss_of_pathogenicity		S	-	-
EXL93406.1	ethyl tert-butyl ether degradation	Y	0	NO_SP	0	0	FALSE	FALSE	noTP	Cytoplasm	cyto	Cytoplasmic			Non-effector	0			S	-	-
EXL93476.1	Beta galactosidase small chain	Y	0	NO_SP	0	0	FALSE	FALSE	noTP	Cytoplasm	cyto	Cytoplasmic		GH2	Non-effector	0	reduced_virulence__unaffected_pathogenicity		G	-	ko:K01190
EXL93488.1	SnoaL-like domain	Y	0	NO_SP	0	0	FALSE	FALSE	noTP	Cytoplasm	cysk	Cytoplasmic			Cytoplasmic effector	0			S	-	-
EXL93603.1	Glycosyl hydrolase family 61	Y	0	NO_SP	0	0	FALSE	FALSE	noTP	Plastid	extr	Membrane bound Mitochondrial		AA9	Apoplastic effector	0	effector_(plant_avirulence_determinant)		O	-	-
EXL93815.1	Beta-flanking protein		0	NO_SP	0	0	FALSE	FALSE	noTP	Cytoplasm	cyto_nucl	Cytoplasmic			Cytoplasmic effector	0			S	-	-
EXL93827.1	Belongs to the FMO family	Y	0	NO_SP	0	0	FALSE	FALSE	noTP	Peroxisome	cyto	Cytoplasmic			Non-effector	0			Q	GO:0000166,GO:0003674,GO:0003824,GO:0004497,GO:0004499,GO:0005488,GO:0005575,GO:0005622,GO:0005623,GO:0005737,GO:0005783,GO:0005789,GO:0005829,GO:0006457,GO:0008150,GO:0008152,GO:0009987,GO:0012505,GO:0016020,GO:0016491,GO:0016705,GO:0016709,GO:0031984,GO:0034975,GO:0036094,GO:0042175,GO:0043167,GO:0043168,GO:0043226,GO:0043227,GO:0043229,GO:0043231,GO:0044422,GO:0044424,GO:0044425,GO:0044432,GO:…	-
EXL93870.1	high mobility group		0	NO_SP	0	0	FALSE	FALSE	noTP	Nucleus	nucl	Nuclear			Cytoplasmic effector	0	reduced_virulence		B	GO:0000217,GO:0000400,GO:0000785,GO:0000792,GO:0001173,GO:0001174,GO:0003674,GO:0003676,GO:0003677,GO:0003690,GO:0005488,GO:0005575,GO:0005622,GO:0005623,GO:0005634,GO:0005694,GO:0005730,GO:0005737,GO:0005829,GO:0006139,GO:0006323,GO:0006351,GO:0006352,GO:0006355,GO:0006356,GO:0006357,GO:0006366,GO:0006367,GO:0006725,GO:0006807,GO:0006996,GO:0008150,GO:0008152,GO:0008301,GO:0009058,GO:0009059,GO:…	ko:K22483
EXL93894.1	Heat shock chaperonin-binding motif.		0	NO_SP	0	0	FALSE	FALSE	noTP	Nucleus	nucl	Nuclear			Cytoplasmic effector	0	reduced_virulence__unaffected_pathogenicity		O	GO:0000226,GO:0003674,GO:0005488,GO:0005515,GO:0005575,GO:0005622,GO:0005623,GO:0005634,GO:0006508,GO:0006511,GO:0006807,GO:0006950,GO:0006996,GO:0007010,GO:0007017,GO:0007049,GO:0008150,GO:0008152,GO:0009056,GO:0009057,GO:0009892,GO:0009894,GO:0009895,GO:0009987,GO:0010033,GO:0010243,GO:0010498,GO:0010605,GO:0016043,GO:0019222,GO:0019538,GO:0019941,GO:0022402,GO:0022607,GO:0030163,GO:0030433,GO:…	ko:K04523
EXL93913.1	to heat shock protein	Y	0	NO_SP	0	0	FALSE	FALSE	noTP	Cytoplasm	nucl	Nuclear			Cytoplasmic effector	0	unaffected_pathogenicity		O	GO:0003674,GO:0003676,GO:0003723,GO:0003729,GO:0004857,GO:0005488,GO:0005515,GO:0005575,GO:0005622,GO:0005623,GO:0005737,GO:0006457,GO:0006605,GO:0006626,GO:0006810,GO:0006839,GO:0006886,GO:0006996,GO:0007005,GO:0008104,GO:0008150,GO:0009987,GO:0015031,GO:0015833,GO:0016043,GO:0030234,GO:0030544,GO:0031072,GO:0032991,GO:0033036,GO:0033365,GO:0034613,GO:0042030,GO:0042886,GO:0043086,GO:0044092,GO:…	ko:K09553
EXL93917.1	Glutathione S-transferase, C-terminal domain		0	NO_SP	0	0	FALSE	FALSE	noTP	Cytoplasm	cyto	Cytoplasmic			Non-effector	0			O	-	-
EXL93926.1	Belongs to the glycosyl hydrolase 3 family	Y	0	NO_SP	0	0	FALSE	FALSE	noTP	Cytoplasm	cyto	Membrane bound Extracellular (Secreted)		GH3	Non-effector	0	reduced_virulence		G	-	ko:K05349
EXL93948.1	histone deacetylase		0	NO_SP	0	0	FALSE	FALSE	noTP	Cytoplasm	cyto	Nuclear			Non-effector	0	reduced_virulence		B	GO:0000003,GO:0000018,GO:0000082,GO:0000083,GO:0000086,GO:0000117,GO:0000118,GO:0000122,GO:0000228,GO:0000278,GO:0000785,GO:0000790,GO:0001302,GO:0003674,GO:0003712,GO:0003713,GO:0003714,GO:0003824,GO:0004407,GO:0005575,GO:0005622,GO:0005623,GO:0005634,GO:0005654,GO:0005694,GO:0006139,GO:0006275,GO:0006325,GO:0006342,GO:0006351,GO:0006354,GO:0006355,GO:0006356,GO:0006357,GO:0006366,GO:0006368,GO:…	ko:K06067
EXL94007.1	Malate dehydrogenase		0	NO_SP	0	0	FALSE	FALSE	mTP	Mitochondrion	mito	Membrane bound Mitochondrial			Non-effector	0			C	GO:0003674,GO:0003824,GO:0004470,GO:0004471,GO:0005575,GO:0005622,GO:0005623,GO:0005737,GO:0005739,GO:0006082,GO:0006090,GO:0006091,GO:0006099,GO:0006101,GO:0006108,GO:0006520,GO:0006807,GO:0008150,GO:0008152,GO:0009060,GO:0009987,GO:0015980,GO:0016491,GO:0016614,GO:0016615,GO:0016616,GO:0016999,GO:0017144,GO:0019752,GO:0032787,GO:0043226,GO:0043227,GO:0043229,GO:0043231,GO:0043436,GO:0043648,GO:…	ko:K00027
EXL94012.1	Glycosyl hydrolases family 2	Y	0	NO_SP	0	0	FALSE	FALSE	noTP	Cytoplasm	cyto_nucl	Cytoplasmic		GH2	Non-effector	0			G	-	ko:K01192
EXL94121.1	The glycine cleavage system catalyzes the degradation of glycine		0	NO_SP	0	0	FALSE	FALSE	mTP	Mitochondrion	mito	Membrane bound Mitochondrial			Non-effector	0	reduced_virulence		E	GO:0001505,GO:0003674,GO:0003824,GO:0004375,GO:0005575,GO:0005622,GO:0005623,GO:0005737,GO:0005739,GO:0005960,GO:0006082,GO:0006520,GO:0006544,GO:0006546,GO:0006730,GO:0006807,GO:0008150,GO:0008152,GO:0009056,GO:0009063,GO:0009069,GO:0009071,GO:0009987,GO:0016054,GO:0016491,GO:0016638,GO:0016642,GO:0017144,GO:0019464,GO:0019752,GO:0032991,GO:0042133,GO:0042135,GO:0042737,GO:0043226,GO:0043227,GO:…	ko:K00281
EXL94140.1	ERAP1-like C-terminal domain		0	NO_SP	0	0	FALSE	FALSE	noTP	Mitochondrion	mito	Nuclear			Non-effector	0	increased_virulence_(hypervirulence)		EO	GO:0000322,GO:0000323,GO:0000324,GO:0000328,GO:0003674,GO:0003824,GO:0004177,GO:0005488,GO:0005575,GO:0005576,GO:0005618,GO:0005622,GO:0005623,GO:0005634,GO:0005737,GO:0005739,GO:0005768,GO:0005770,GO:0005771,GO:0005773,GO:0005775,GO:0005975,GO:0005976,GO:0005977,GO:0006073,GO:0006091,GO:0006112,GO:0006508,GO:0006518,GO:0006807,GO:0008104,GO:0008150,GO:0008152,GO:0008233,GO:0008235,GO:0008236,GO:…	ko:K13721
EXL94144.1	Stereospecific condensation of phosphoenolpyruvate (PEP) and D-erythrose-4-phosphate (E4P) giving rise to 3-deoxy-D- arabino-heptulosonate-7-phosphate (DAHP)		0	NO_SP	0	0	FALSE	FALSE	noTP	Cytoplasm	cyto	Cytoplasmic			Non-effector	0	unaffected_pathogenicity__loss_of_pathogenicity		E	GO:0003674,GO:0003824,GO:0003849,GO:0005575,GO:0005622,GO:0005623,GO:0005634,GO:0005737,GO:0006082,GO:0006520,GO:0006725,GO:0006807,GO:0008150,GO:0008152,GO:0008652,GO:0009058,GO:0009072,GO:0009073,GO:0009423,GO:0009987,GO:0016053,GO:0016740,GO:0016765,GO:0019438,GO:0019752,GO:0043226,GO:0043227,GO:0043229,GO:0043231,GO:0043436,GO:0043648,GO:0043650,GO:0044237,GO:0044238,GO:0044249,GO:0044281,GO:…	ko:K01626
EXL94147.1	Belongs to the eukaryotic ribosomal protein eL13 family		0	NO_SP	0	0	FALSE	FALSE	noTP	Cytoplasm	nucl	Cytoplasmic			Cytoplasmic effector	0			J	GO:0002181,GO:0003674,GO:0003676,GO:0003723,GO:0003735,GO:0005198,GO:0005488,GO:0005575,GO:0005622,GO:0005623,GO:0005737,GO:0005829,GO:0005840,GO:0006412,GO:0006518,GO:0006807,GO:0006914,GO:0008150,GO:0008152,GO:0009056,GO:0009058,GO:0009059,GO:0009986,GO:0009987,GO:0010467,GO:0015934,GO:0016236,GO:0019538,GO:0022625,GO:0022626,GO:0032991,GO:0034641,GO:0034645,GO:0043043,GO:0043170,GO:0043226,GO:…	ko:K02873
EXL94185.1	This protein promotes the GTP-dependent binding of aminoacyl-tRNA to the A-site of ribosomes during protein biosynthesis		0	NO_SP	0	0	FALSE	FALSE	noTP	Peroxisome	cyto	Cytoplasmic			Non-effector	0	reduced_virulence		J	GO:0000166,GO:0000322,GO:0000323,GO:0000324,GO:0000329,GO:0001882,GO:0001883,GO:0002181,GO:0002182,GO:0003674,GO:0003676,GO:0003723,GO:0003746,GO:0003824,GO:0003924,GO:0005488,GO:0005515,GO:0005516,GO:0005525,GO:0005575,GO:0005618,GO:0005622,GO:0005623,GO:0005737,GO:0005739,GO:0005773,GO:0005774,GO:0005829,GO:0005840,GO:0005853,GO:0006403,GO:0006405,GO:0006409,GO:0006412,GO:0006414,GO:0006518,GO:…	ko:K03231
EXL94235.1	Belongs to the oxygen-dependent FAD-linked oxidoreductase family		0	SP	0	0	FALSE	FALSE	SP	Extracellular	extr	Membrane bound Mitochondrial	Classical_secreted	AA7	Non-effector	0			C	-	-
EXL94245.1	Pathogen effector; putative necrosis-inducing factor		0	SP	0	0	FALSE	FALSE	SP	Extracellular	cyto	Extracellular (Secreted)	Classical_secreted		Apoplastic effector	0		Y	S	-	-
EXL94281.1	Fatty acid synthase subunit beta dehydratase		0	NO_SP	0	0	FALSE	FALSE	noTP	Cytoplasm	cyto	Membrane bound Peroxisomal			Non-effector	0	reduced_virulence		I	GO:0001676,GO:0003674,GO:0003824,GO:0004312,GO:0004313,GO:0004314,GO:0004317,GO:0004318,GO:0004319,GO:0004321,GO:0005575,GO:0005622,GO:0005623,GO:0005737,GO:0005739,GO:0005811,GO:0005829,GO:0005835,GO:0006082,GO:0006629,GO:0006631,GO:0006633,GO:0008150,GO:0008152,GO:0008610,GO:0009058,GO:0009987,GO:0016053,GO:0016407,GO:0016408,GO:0016409,GO:0016417,GO:0016418,GO:0016419,GO:0016420,GO:0016491,GO:…	ko:K00667,ko:K00668
EXL94283.1	Fatty acid synthase subunit alpha reductase		0	NO_SP	0	0	FALSE	FALSE	noTP	Cytoplasm	cyto	Nuclear			Non-effector	0	loss_of_pathogenicity		Q	GO:0001676,GO:0003674,GO:0003824,GO:0004312,GO:0004313,GO:0004314,GO:0004315,GO:0004316,GO:0004317,GO:0004318,GO:0004319,GO:0004321,GO:0005575,GO:0005622,GO:0005623,GO:0005737,GO:0005739,GO:0005811,GO:0005829,GO:0005835,GO:0006082,GO:0006629,GO:0006631,GO:0006633,GO:0008150,GO:0008152,GO:0008610,GO:0008897,GO:0009058,GO:0009405,GO:0009987,GO:0016053,GO:0016407,GO:0016408,GO:0016409,GO:0016417,GO:…	ko:K00667,ko:K00668
EXL94299.1	Pyridoxamine 5'-phosphate oxidase		0	NO_SP	0	0	FALSE	FALSE	noTP	Cytoplasm	nucl	Nuclear			Non-effector	0			S	-	ko:K00275
EXL94326.1	GPI-anchored cell wall beta-1,3-endoglucanase EglC		0	SP	0	0	FALSE	TRUE	SP	Cell_membrane	extr	Membrane bound Extracellular (Secreted)	Classical_membrane	GH17	Non-effector	0	unaffected_pathogenicity__reduced_virulence		G	GO:0003674,GO:0003824,GO:0005975,GO:0008150,GO:0008152,GO:0016740,GO:0016757,GO:0016787,GO:0016798,GO:0044238,GO:0071704	ko:K01199
EXL94337.1	Carbamoyl-phosphate synthase small chain, CPSase domain		0	NO_SP	0	0	FALSE	FALSE	noTP	Cytoplasm	cyto	Plasma membrane			Non-effector	0	reduced_virulence		F	GO:0000050,GO:0003674,GO:0003824,GO:0003922,GO:0004070,GO:0004087,GO:0004088,GO:0004151,GO:0005575,GO:0005622,GO:0005623,GO:0005737,GO:0005739,GO:0006082,GO:0006139,GO:0006142,GO:0006206,GO:0006207,GO:0006520,GO:0006525,GO:0006526,GO:0006541,GO:0006725,GO:0006807,GO:0008150,GO:0008152,GO:0008652,GO:0009058,GO:0009064,GO:0009084,GO:0009112,GO:0009892,GO:0009987,GO:0016020,GO:0016021,GO:0016053,GO:…	ko:K01954,ko:K11541
EXL94339.1	Pyridoxamine 5'-phosphate oxidase		0	NO_SP	0	0	FALSE	FALSE	noTP	Cytoplasm	nucl	Nuclear			Non-effector	0	reduced_virulence		H	GO:0000166,GO:0003674,GO:0003824,GO:0004733,GO:0005488,GO:0005575,GO:0005622,GO:0005623,GO:0005737,GO:0005739,GO:0005740,GO:0005758,GO:0006081,GO:0006725,GO:0006732,GO:0006766,GO:0006767,GO:0006793,GO:0006796,GO:0006807,GO:0008150,GO:0008152,GO:0009058,GO:0009108,GO:0009110,GO:0009443,GO:0009987,GO:0010181,GO:0016491,GO:0016638,GO:0016641,GO:0017144,GO:0018130,GO:0019438,GO:0019637,GO:0031967,GO:…	ko:K00275
EXL94371.1	extracellular serine-rich protein		0	SP	1	1	FALSE	TRUE	SP	Cell_membrane	extr	Cytoplasmic	Classical_membrane		Cytoplasmic effector	0			S	-	-
EXL94385.1	Belongs to the cullin family		0	NO_SP	0	0	FALSE	FALSE	noTP	Cytoplasm	cyto	Cytoplasmic			Non-effector	0	unaffected_pathogenicity		O	GO:0000082,GO:0000086,GO:0000151,GO:0000152,GO:0000278,GO:0003674,GO:0003676,GO:0003677,GO:0003688,GO:0003690,GO:0005488,GO:0005515,GO:0005575,GO:0005622,GO:0005623,GO:0005634,GO:0006275,GO:0006508,GO:0006511,GO:0006807,GO:0007049,GO:0007346,GO:0008150,GO:0008152,GO:0008156,GO:0009056,GO:0009057,GO:0009889,GO:0009890,GO:0009892,GO:0009987,GO:0010498,GO:0010556,GO:0010558,GO:0010564,GO:0010605,GO:…	ko:K03347
EXL94394.1	Phosphorylase is an important allosteric enzyme in carbohydrate metabolism. Enzymes from different sources differ in their regulatory mechanisms and in their natural substrates. However, all known phosphorylases share catalytic and structural properties		0	NO_SP	0	0	FALSE	FALSE	noTP	Cytoplasm	cyto	Cytoplasmic		GT35	Non-effector	0	unaffected_pathogenicity__loss_of_pathogenicity__reduced_virulence		G	GO:0000272,GO:0003674,GO:0003824,GO:0004645,GO:0005488,GO:0005575,GO:0005622,GO:0005623,GO:0005737,GO:0005975,GO:0005976,GO:0005977,GO:0005980,GO:0006073,GO:0006091,GO:0006112,GO:0008144,GO:0008150,GO:0008152,GO:0008184,GO:0009056,GO:0009057,GO:0009251,GO:0009987,GO:0015980,GO:0016052,GO:0016740,GO:0016757,GO:0016758,GO:0019842,GO:0030170,GO:0036094,GO:0043167,GO:0043168,GO:0043170,GO:0044042,GO:…	ko:K00688
EXL94397.1	Mitogen-activated protein kinase		0	NO_SP	0	0	FALSE	FALSE	noTP	Cytoplasm	nucl	Cytoplasmic			Non-effector	0	reduced_virulence		T	GO:0000003,GO:0000018,GO:0000165,GO:0000166,GO:0000187,GO:0001410,GO:0001775,GO:0001817,GO:0001819,GO:0001932,GO:0001934,GO:0002237,GO:0002252,GO:0002263,GO:0002274,GO:0002275,GO:0002283,GO:0002366,GO:0002376,GO:0002443,GO:0002444,GO:0002446,GO:0002520,GO:0002521,GO:0002573,GO:0002682,GO:0002684,GO:0002791,GO:0002793,GO:0002831,GO:0002832,GO:0003674,GO:0003682,GO:0003824,GO:0004672,GO:0004674,GO:…	ko:K04441
EXL94416.1	domain in glucosyltransferases, myotubularins and other putative membrane-associated proteins	Y	0	NO_SP	1	1	FALSE	FALSE	noTP	Nucleus	mito	Plasma membrane			Non-effector	0			S	GO:0003674,GO:0005488,GO:0005496,GO:0005575,GO:0005622,GO:0005623,GO:0005737,GO:0005739,GO:0005783,GO:0005938,GO:0006810,GO:0006869,GO:0008150,GO:0008289,GO:0009987,GO:0010876,GO:0012505,GO:0015850,GO:0015918,GO:0016043,GO:0022406,GO:0031984,GO:0032365,GO:0032366,GO:0032541,GO:0032934,GO:0033036,GO:0043226,GO:0043227,GO:0043229,GO:0043231,GO:0044232,GO:0044233,GO:0044422,GO:0044424,GO:0044432,GO:…	-
EXL94466.1	to polyamine oxidase		0	SP	0	0	FALSE	FALSE	SP	Extracellular	extr	Membrane bound Extracellular (Secreted)	Classical_secreted		Non-effector	0	unaffected_pathogenicity		Q	-	ko:K13366
EXL94631.1	Metallo-beta-lactamase superfamily	Y	0	NO_SP	0	0	FALSE	FALSE	noTP	Cytoplasm	extr	Cytoplasmic			Non-effector	0			S	-	-
EXL94687.1	Four repeated domains in the Fasciclin I family of proteins, present in many other contexts.		0	SP	0	0	FALSE	FALSE	SP	Extracellular	cyto	Membrane bound Endoplasmic reticulum	Classical_secreted		Non-effector	0			M	-	ko:K05747
EXL94708.1	to cell wall glycosyl hydrolase		0	SP	0	0	FALSE	FALSE	SP	Extracellular	mito	Membrane bound Extracellular (Secreted)	Classical_secreted	GH105	Non-effector	0			O	-	ko:K15532
EXL94751.1	to polyubiquitin binding protein Doa1 Ufd3		0	NO_SP	0	0	FALSE	FALSE	noTP	Cytoplasm	cyto	Cytoplasmic			Non-effector	0	reduced_virulence		I	GO:0000726,GO:0003674,GO:0005488,GO:0005515,GO:0005575,GO:0005622,GO:0005623,GO:0005634,GO:0005737,GO:0006139,GO:0006259,GO:0006281,GO:0006302,GO:0006303,GO:0006325,GO:0006464,GO:0006508,GO:0006511,GO:0006725,GO:0006807,GO:0006914,GO:0006950,GO:0006974,GO:0006996,GO:0008150,GO:0008152,GO:0009056,GO:0009057,GO:0009987,GO:0010498,GO:0010992,GO:0016043,GO:0016236,GO:0016567,GO:0016569,GO:0016570,GO:…	ko:K14018
EXL94832.1	to branched-chain amino acid aminotransferase		0	NO_SP	0	0	FALSE	FALSE	noTP	Cytoplasm	cyto	Cytoplasmic			Non-effector	0	loss_of_pathogenicity		E	-	ko:K00826
EXL94857.1	Threonine synthase		0	NO_SP	0	0	FALSE	FALSE	noTP	Cytoplasm	cyto	Cytoplasmic			Non-effector	0	reduced_virulence		E	-	ko:K01733
EXL94889.1	Plays an important role in the de novo pathway and in the salvage pathway of purine nucleotide biosynthesis. Catalyzes the first commited step in the biosynthesis of AMP from IMP		0	NO_SP	0	0	FALSE	FALSE	noTP	Cytoplasm	cyto	Cytoplasmic			Non-effector	0	reduced_virulence		F	GO:0003674,GO:0003676,GO:0003677,GO:0003688,GO:0003690,GO:0003824,GO:0004019,GO:0005488,GO:0005575,GO:0005622,GO:0005623,GO:0005737,GO:0006082,GO:0006106,GO:0006139,GO:0006163,GO:0006164,GO:0006167,GO:0006725,GO:0006753,GO:0006793,GO:0006796,GO:0006807,GO:0008150,GO:0008152,GO:0009058,GO:0009116,GO:0009117,GO:0009119,GO:0009123,GO:0009124,GO:0009126,GO:0009127,GO:0009150,GO:0009152,GO:0009156,GO:…	ko:K01939
EXL94897.1	thiaminase activity	Y	0	NO_SP	0	0	FALSE	FALSE	noTP	Cytoplasm	cyto	Membrane bound Golgi			Non-effector	0			K	-	ko:K20896
EXL94910.1	to mRNA binding post-transcriptional regulator		0	NO_SP	0	0	FALSE	FALSE	noTP	Nucleus	nucl	Nuclear			Non-effector	0	lethal		A	GO:0000243,GO:0000245,GO:0000375,GO:0000377,GO:0000398,GO:0003674,GO:0003676,GO:0003723,GO:0003729,GO:0005488,GO:0005575,GO:0005622,GO:0005623,GO:0005634,GO:0005681,GO:0005684,GO:0005685,GO:0005737,GO:0006139,GO:0006376,GO:0006396,GO:0006397,GO:0006725,GO:0006807,GO:0008150,GO:0008152,GO:0008380,GO:0009893,GO:0009987,GO:0010467,GO:0010468,GO:0010494,GO:0010604,GO:0010628,GO:0016043,GO:0016070,GO:…	-
EXL94989.1	Catalyzes the oxidative decarboxylation of 6- phosphogluconate to ribulose 5-phosphate and CO(2), with concomitant reduction of NADP to NADPH	Y	0	NO_SP	0	0	FALSE	FALSE	noTP	Cytoplasm	cyto	Cytoplasmic			Non-effector	0	reduced_virulence		E	-	ko:K00033
EXL95001.1	Component of the eukaryotic translation initiation factor 3 (eIF-3) complex, which is involved in protein synthesis and, together with other initiation factors, stimulates binding of mRNA and methionyl-tRNAi to the 40S ribosome		0	NO_SP	0	0	FALSE	FALSE	noTP	Cytoplasm	cyto	Cytoplasmic			Non-effector	0			J	GO:0002181,GO:0002183,GO:0003674,GO:0003676,GO:0003723,GO:0003743,GO:0005488,GO:0005575,GO:0005618,GO:0005622,GO:0005623,GO:0005737,GO:0005852,GO:0006412,GO:0006413,GO:0006518,GO:0006807,GO:0008135,GO:0008150,GO:0008152,GO:0009058,GO:0009059,GO:0009277,GO:0009847,GO:0009987,GO:0010467,GO:0010494,GO:0016282,GO:0019538,GO:0030312,GO:0032502,GO:0032991,GO:0033290,GO:0034641,GO:0034645,GO:0035690,GO:…	ko:K03253
EXL95004.1	assists the folding of proteins upon ATP hydrolysis		0	NO_SP	0	0	FALSE	FALSE	noTP	Cytoplasm	cyto	Cytoplasmic			Non-effector	0	unaffected_pathogenicity		O	GO:0000166,GO:0003674,GO:0005488,GO:0005515,GO:0005524,GO:0005575,GO:0005622,GO:0005623,GO:0005737,GO:0005829,GO:0005832,GO:0005856,GO:0006457,GO:0006458,GO:0008144,GO:0008150,GO:0009987,GO:0017076,GO:0030554,GO:0032553,GO:0032555,GO:0032559,GO:0032991,GO:0035639,GO:0036094,GO:0043167,GO:0043168,GO:0043226,GO:0043228,GO:0043229,GO:0043232,GO:0044183,GO:0044424,GO:0044444,GO:0044445,GO:0044464,GO:…	ko:K09494
EXL95066.1	curved dna-binding protein		0	NO_SP	0	0	FALSE	FALSE	noTP	Cytoplasm	cyto	Nuclear			Cytoplasmic effector	0			J	GO:0003674,GO:0003676,GO:0003677,GO:0003824,GO:0004518,GO:0005488,GO:0005575,GO:0005622,GO:0005623,GO:0005634,GO:0006139,GO:0006725,GO:0006807,GO:0008150,GO:0008152,GO:0009987,GO:0016787,GO:0016788,GO:0034641,GO:0043170,GO:0043226,GO:0043227,GO:0043229,GO:0043231,GO:0044237,GO:0044238,GO:0044424,GO:0044464,GO:0046483,GO:0071704,GO:0090304,GO:0090305,GO:0097159,GO:1901360,GO:1901363	ko:K01265
EXL95083.1	Eps15 homology domain	Y	0	NO_SP	0	0	FALSE	FALSE	noTP	Cytoplasm	nucl	Cytoplasmic			Non-effector	0	reduced_virulence		TU	GO:0000902,GO:0005575,GO:0005623,GO:0006810,GO:0006897,GO:0008150,GO:0009653,GO:0009826,GO:0009987,GO:0016043,GO:0016049,GO:0016192,GO:0030427,GO:0032502,GO:0032989,GO:0040007,GO:0044464,GO:0048589,GO:0048856,GO:0048869,GO:0051179,GO:0051234,GO:0060560,GO:0071840,GO:0098657	ko:K20047
EXL95131.1	Eukaryotic peptide chain release factor subunit 1		0	NO_SP	0	0	FALSE	FALSE	noTP	Cytoplasm	cyto	Cytoplasmic			Non-effector	0	unaffected_pathogenicity		J	GO:0002181,GO:0002184,GO:0003674,GO:0003676,GO:0003723,GO:0003729,GO:0003747,GO:0005488,GO:0005515,GO:0005575,GO:0005622,GO:0005623,GO:0005737,GO:0006139,GO:0006351,GO:0006353,GO:0006412,GO:0006415,GO:0006518,GO:0006725,GO:0006807,GO:0008022,GO:0008079,GO:0008135,GO:0008150,GO:0008152,GO:0009058,GO:0009059,GO:0009987,GO:0010467,GO:0010494,GO:0016043,GO:0016070,GO:0016149,GO:0018130,GO:0018444,GO:…	ko:K03265
EXL95139.1	Putative death-receptor fusion protein (DUF2428)		0	NO_SP	0	0	FALSE	FALSE	noTP	Cytoplasm	cyto	Cytoplasmic			Non-effector	0			D	GO:0001510,GO:0005575,GO:0005622,GO:0005623,GO:0005737,GO:0006139,GO:0006396,GO:0006399,GO:0006400,GO:0006725,GO:0006807,GO:0008033,GO:0008150,GO:0008152,GO:0009451,GO:0009987,GO:0010467,GO:0016070,GO:0030488,GO:0032259,GO:0032991,GO:0034470,GO:0034641,GO:0034660,GO:0043170,GO:0043412,GO:0043414,GO:0044237,GO:0044238,GO:0044260,GO:0044424,GO:0044464,GO:0046483,GO:0071704,GO:0090304,GO:1901360	-
EXL95155.1	Fungal specific transcription factor domain	Y	0	NO_SP	0	0	FALSE	FALSE	noTP	Nucleus	nucl	Nuclear			Non-effector	0	unaffected_pathogenicity		K	GO:0001067,GO:0003674,GO:0003676,GO:0003677,GO:0005488,GO:0005575,GO:0005622,GO:0005623,GO:0005634,GO:0006082,GO:0006355,GO:0006357,GO:0006629,GO:0006631,GO:0008150,GO:0008152,GO:0009056,GO:0009062,GO:0009889,GO:0009987,GO:0010468,GO:0010556,GO:0016042,GO:0016054,GO:0019219,GO:0019222,GO:0019752,GO:0031323,GO:0031326,GO:0032787,GO:0043226,GO:0043227,GO:0043229,GO:0043231,GO:0043436,GO:0044212,GO:…	ko:K09244
EXL95165.1	to a-pheromone processing metallopeptidase Ste23		0	NO_SP	0	0	FALSE	FALSE	noTP	Cytoplasm	nucl	Nuclear			Non-effector	0			O	GO:0003674,GO:0003824,GO:0004175,GO:0004222,GO:0005575,GO:0005622,GO:0005623,GO:0005737,GO:0005739,GO:0006508,GO:0006807,GO:0007323,GO:0008150,GO:0008152,GO:0008233,GO:0008237,GO:0010467,GO:0016020,GO:0016787,GO:0019538,GO:0019898,GO:0031136,GO:0031137,GO:0031139,GO:0043170,GO:0043226,GO:0043227,GO:0043229,GO:0043231,GO:0043900,GO:0043902,GO:0044238,GO:0044424,GO:0044425,GO:0044444,GO:0044464,GO:…	ko:K01408
EXL95191.1	Belongs to the universal ribosomal protein uS13 family		0	NO_SP	0	0	FALSE	FALSE	noTP	Cytoplasm	mito	Mitochondrial			Cytoplasmic effector	0			J	GO:0000447,GO:0000460,GO:0000462,GO:0000466,GO:0000469,GO:0000478,GO:0000479,GO:0002181,GO:0003674,GO:0003735,GO:0005198,GO:0005575,GO:0005622,GO:0005623,GO:0005737,GO:0005739,GO:0005829,GO:0005840,GO:0006139,GO:0006364,GO:0006396,GO:0006403,GO:0006405,GO:0006407,GO:0006412,GO:0006518,GO:0006611,GO:0006725,GO:0006807,GO:0006810,GO:0006886,GO:0006913,GO:0008104,GO:0008150,GO:0008152,GO:0009058,GO:…	ko:K02964
EXL95212.1	Protein kinase C conserved region 2 (CalB)		0	NO_SP	1	2	FALSE	FALSE	noTP	Cell_membrane	cyto	Plasma membrane	Classical_membrane		Non-effector	0			U	GO:0003674,GO:0005488,GO:0005543,GO:0005575,GO:0005622,GO:0005623,GO:0005737,GO:0005739,GO:0005783,GO:0005794,GO:0005886,GO:0005933,GO:0005938,GO:0006996,GO:0007029,GO:0008150,GO:0008289,GO:0009987,GO:0010256,GO:0012505,GO:0016020,GO:0016043,GO:0019216,GO:0019220,GO:0019222,GO:0022406,GO:0031323,GO:0031410,GO:0031982,GO:0031984,GO:0032541,GO:0035303,GO:0043167,GO:0043168,GO:0043226,GO:0043227,GO:…	-
EXL95265.1	argininosuccinate lyase		0	NO_SP	0	0	FALSE	FALSE	noTP	Cytoplasm	cysk	Cytoplasmic			Non-effector	0	reduced_virulence		E	-	ko:K01755
EXL95293.1	Belongs to the DEAD box helicase family	Y	0	NO_SP	0	0	FALSE	FALSE	noTP	Nucleus	nucl	Nuclear			Non-effector	0	unaffected_pathogenicity		A	GO:0000245,GO:0000354,GO:0000375,GO:0000377,GO:0000384,GO:0000395,GO:0000398,GO:0003674,GO:0003676,GO:0003723,GO:0003724,GO:0003824,GO:0004004,GO:0004386,GO:0005488,GO:0005575,GO:0005622,GO:0005623,GO:0005634,GO:0005681,GO:0005682,GO:0005730,GO:0005737,GO:0006139,GO:0006376,GO:0006396,GO:0006397,GO:0006725,GO:0006807,GO:0008026,GO:0008150,GO:0008152,GO:0008186,GO:0008380,GO:0009987,GO:0010467,GO:…	ko:K12858
EXL95296.1	Belongs to the 14-3-3 family		0	NO_SP	0	0	FALSE	FALSE	noTP	Cytoplasm	nucl	Mitochondrial			Cytoplasmic effector	0	reduced_virulence		O	GO:0000003,GO:0000075,GO:0000076,GO:0000077,GO:0000122,GO:0000271,GO:0000278,GO:0000910,GO:0001085,GO:0001100,GO:0001102,GO:0001402,GO:0001410,GO:0001932,GO:0001933,GO:0002831,GO:0002833,GO:0003006,GO:0003674,GO:0003676,GO:0003677,GO:0003688,GO:0003690,GO:0004857,GO:0004860,GO:0004864,GO:0005488,GO:0005515,GO:0005575,GO:0005618,GO:0005622,GO:0005623,GO:0005634,GO:0005737,GO:0005819,GO:0005826,GO:…	ko:K06630
EXL95309.1	Belongs to the DEAD box helicase family		0	NO_SP	0	0	FALSE	FALSE	noTP	Cytoplasm	nucl	Nuclear			Non-effector	0	reduced_virulence		J	GO:0002181,GO:0002183,GO:0003674,GO:0003676,GO:0003723,GO:0003724,GO:0003743,GO:0003824,GO:0004004,GO:0004386,GO:0005488,GO:0005575,GO:0005622,GO:0005623,GO:0005634,GO:0005730,GO:0005737,GO:0005829,GO:0005840,GO:0005886,GO:0006139,GO:0006412,GO:0006413,GO:0006417,GO:0006446,GO:0006518,GO:0006725,GO:0006807,GO:0008026,GO:0008135,GO:0008150,GO:0008152,GO:0008186,GO:0009058,GO:0009059,GO:0009889,GO:…	ko:K03257
EXL95319.1	Serine aminopeptidase, S33	Y	0	NO_SP	0	0	FALSE	FALSE	noTP	Cytoplasm	cyto	Cytoplasmic			Non-effector	0	effector_(plant_avirulence_determinant)		S	-	-
EXL95336.1	DNA-binding domain of DNA mismatch repair MUTS family	Y	0	NO_SP	0	0	FALSE	FALSE	noTP	Plastid	mito	Membrane bound Mitochondrial			Non-effector	0	unaffected_pathogenicity		L	GO:0000002,GO:0000166,GO:0000217,GO:0000403,GO:0000404,GO:0000406,GO:0003674,GO:0003676,GO:0003677,GO:0003684,GO:0003690,GO:0003824,GO:0005488,GO:0005524,GO:0005575,GO:0005622,GO:0005623,GO:0005634,GO:0005737,GO:0005739,GO:0006139,GO:0006259,GO:0006281,GO:0006298,GO:0006725,GO:0006807,GO:0006950,GO:0006974,GO:0006996,GO:0007005,GO:0008094,GO:0008144,GO:0008150,GO:0008152,GO:0009987,GO:0016043,GO:…	-
EXL95337.1	Ribosomal protein P0 is the functional equivalent of E.coli protein L10		0	NO_SP	0	0	FALSE	FALSE	noTP	Cytoplasm	cyto	Cytoplasmic			Non-effector	0			J	GO:0000027,GO:0002181,GO:0002182,GO:0003674,GO:0003676,GO:0003723,GO:0003735,GO:0005198,GO:0005488,GO:0005575,GO:0005622,GO:0005623,GO:0005737,GO:0005829,GO:0005840,GO:0006412,GO:0006414,GO:0006518,GO:0006807,GO:0006996,GO:0008150,GO:0008152,GO:0009058,GO:0009059,GO:0009987,GO:0010467,GO:0015934,GO:0016043,GO:0019538,GO:0019843,GO:0022607,GO:0022613,GO:0022618,GO:0022625,GO:0022626,GO:0030684,GO:…	ko:K02941
EXL95340.1	to protein mitochondrial targeting protein Mas1		0	NO_SP	0	0	FALSE	FALSE	noTP	Nucleus	cyto	Cytoplasmic			Cytoplasmic effector	0	loss_of_pathogenicity		O	GO:0001671,GO:0003674,GO:0005488,GO:0005515,GO:0005575,GO:0005622,GO:0005623,GO:0005737,GO:0005829,GO:0006403,GO:0006404,GO:0006457,GO:0006458,GO:0006508,GO:0006511,GO:0006605,GO:0006626,GO:0006807,GO:0006810,GO:0006839,GO:0006886,GO:0006913,GO:0006950,GO:0006996,GO:0007005,GO:0008047,GO:0008104,GO:0008150,GO:0008152,GO:0009056,GO:0009057,GO:0009987,GO:0010033,GO:0010243,GO:0010498,GO:0015031,GO:…	ko:K09503
EXL95429.1	LSM domain	Y	0	NO_SP	0	0	FALSE	FALSE	noTP	Nucleus	nucl	Nuclear			Cytoplasmic effector	0			A	GO:0000375,GO:0000377,GO:0000398,GO:0000956,GO:0003674,GO:0003676,GO:0003723,GO:0003727,GO:0005488,GO:0005575,GO:0005622,GO:0005623,GO:0005634,GO:0005681,GO:0005684,GO:0005688,GO:0005689,GO:0005730,GO:0005732,GO:0005737,GO:0006139,GO:0006364,GO:0006396,GO:0006397,GO:0006401,GO:0006402,GO:0006725,GO:0006807,GO:0008150,GO:0008152,GO:0008187,GO:0008266,GO:0008380,GO:0009056,GO:0009057,GO:0009892,GO:…	ko:K12626
EXL95482.1	to nonsense-mediated mRNA decay protein Nmd5	Y	0	NO_SP	0	0	FALSE	FALSE	noTP	Nucleus	mito	Membrane bound Golgi			Non-effector	0			UY	GO:0000166,GO:0001882,GO:0001883,GO:0003674,GO:0005049,GO:0005215,GO:0005488,GO:0005525,GO:0005575,GO:0005622,GO:0005623,GO:0005634,GO:0005635,GO:0005643,GO:0005737,GO:0005829,GO:0006403,GO:0006405,GO:0006406,GO:0006606,GO:0006611,GO:0006810,GO:0006886,GO:0006913,GO:0008104,GO:0008150,GO:0008152,GO:0008565,GO:0010467,GO:0012505,GO:0015031,GO:0015833,GO:0015931,GO:0016020,GO:0016021,GO:0017038,GO:…	ko:K20223
EXL95509.1	40S ribosomal protein S9		0	NO_SP	0	0	FALSE	FALSE	noTP	Cytoplasm	mito	Cytoplasmic			Cytoplasmic effector	0			J	GO:0000462,GO:0002181,GO:0003674,GO:0003676,GO:0003723,GO:0003735,GO:0005198,GO:0005488,GO:0005575,GO:0005622,GO:0005623,GO:0005737,GO:0005829,GO:0005840,GO:0006139,GO:0006364,GO:0006396,GO:0006412,GO:0006417,GO:0006450,GO:0006518,GO:0006725,GO:0006807,GO:0008150,GO:0008152,GO:0009058,GO:0009059,GO:0009889,GO:0009891,GO:0009893,GO:0009987,GO:0010467,GO:0010468,GO:0010556,GO:0010557,GO:0010604,GO:…	ko:K02997
EXL95538.1	Catalyzes the first intracellular reaction of sulfate assimilation, forming adenosine-5'-phosphosulfate (APS) from inorganic sulfate and ATP. Plays an important role in sulfate activation as a component of the biosynthesis pathway of sulfur- containing amino acids		0	NO_SP	0	0	FALSE	FALSE	noTP	Cytoplasm	cyto	Cytoplasmic			Non-effector	0	reduced_virulence		P	GO:0000096,GO:0000103,GO:0003674,GO:0003824,GO:0004779,GO:0004781,GO:0005575,GO:0005622,GO:0005623,GO:0005737,GO:0005739,GO:0006082,GO:0006520,GO:0006790,GO:0006807,GO:0008150,GO:0008152,GO:0009987,GO:0010134,GO:0016740,GO:0016772,GO:0016779,GO:0019379,GO:0019419,GO:0019752,GO:0043226,GO:0043227,GO:0043229,GO:0043231,GO:0043436,GO:0044237,GO:0044238,GO:0044281,GO:0044424,GO:0044444,GO:0044464,GO:…	ko:K00958
EXL95542.1	Uncharacterized protein family UPF0016	Y	0	SP	6	6	FALSE	TRUE	SP	Cell_membrane	extr	Membrane bound Mitochondrial	Classical_membrane		Non-effector	0			U	GO:0000041,GO:0000322,GO:0000323,GO:0000324,GO:0000329,GO:0003674,GO:0005215,GO:0005384,GO:0005575,GO:0005622,GO:0005623,GO:0005737,GO:0005773,GO:0005774,GO:0005794,GO:0005795,GO:0005797,GO:0005801,GO:0006810,GO:0006811,GO:0006812,GO:0006816,GO:0006828,GO:0006873,GO:0006874,GO:0006875,GO:0008150,GO:0008324,GO:0009987,GO:0012505,GO:0015075,GO:0015077,GO:0015078,GO:0015085,GO:0015291,GO:0015297,GO:…	-
EXL95559.1	tRNA synthetases class II (D, K and N)		0	NO_SP	0	0	FALSE	FALSE	noTP	Cytoplasm	cyto	Cytoplasmic			Non-effector	0	unaffected_pathogenicity		J	-	ko:K01893
EXL95579.1	2-methylcitrate dehydratase		0	NO_SP	0	0	FALSE	FALSE	mTP	Mitochondrion	mito	Membrane bound Mitochondrial			Non-effector	0			S	GO:0003674,GO:0003824,GO:0005575,GO:0005622,GO:0005623,GO:0005737,GO:0005739,GO:0005740,GO:0005741,GO:0006082,GO:0006629,GO:0006631,GO:0008150,GO:0008152,GO:0009987,GO:0016020,GO:0016829,GO:0016835,GO:0016836,GO:0016999,GO:0017144,GO:0019541,GO:0019679,GO:0019752,GO:0019867,GO:0031090,GO:0031966,GO:0031967,GO:0031968,GO:0031975,GO:0032787,GO:0043226,GO:0043227,GO:0043229,GO:0043231,GO:0043436,GO:…	ko:K01720
EXL95590.1	CFEM domain		0	SP	0	0	FALSE	TRUE	SP	Extracellular	cyto	Membrane bound Extracellular (Secreted)	Classical_membrane		Non-effector	0	unaffected_pathogenicity		TV	-	-
EXL95607.1	Stress responsive A/B Barrel Domain	Y	0	NO_SP	0	0	FALSE	FALSE	noTP	Cytoplasm	cyto	Extracellular (Secreted)			Cytoplasmic effector	0			S	-	-
EXL95692.1	Ribosomal protein S27		0	NO_SP	0	0	FALSE	FALSE	noTP	Extracellular	mito	Membrane bound Extracellular (Secreted)	Non-classical_secreted		Apoplastic/cytoplasmic effector	1		Y	J	GO:0000028,GO:0000462,GO:0000469,GO:0000478,GO:0000479,GO:0002181,GO:0003674,GO:0003735,GO:0005198,GO:0005575,GO:0005622,GO:0005623,GO:0005737,GO:0005829,GO:0005840,GO:0006139,GO:0006364,GO:0006396,GO:0006412,GO:0006518,GO:0006725,GO:0006807,GO:0006996,GO:0008150,GO:0008152,GO:0009058,GO:0009059,GO:0009987,GO:0010467,GO:0015935,GO:0016043,GO:0016070,GO:0016072,GO:0019538,GO:0022607,GO:0022613,GO:…	ko:K02978
EXL95731.1	Belongs to the actin family		0	NO_SP	0	0	FALSE	FALSE	noTP	Nucleus	nucl	Nuclear			Non-effector	0	reduced_virulence		Z	GO:0000228,GO:0000785,GO:0000790,GO:0005575,GO:0005622,GO:0005623,GO:0005634,GO:0005694,GO:0006325,GO:0006338,GO:0006996,GO:0008150,GO:0009987,GO:0016043,GO:0031011,GO:0031974,GO:0031981,GO:0032991,GO:0033202,GO:0034728,GO:0042766,GO:0043044,GO:0043226,GO:0043227,GO:0043228,GO:0043229,GO:0043231,GO:0043232,GO:0043233,GO:0043933,GO:0044422,GO:0044424,GO:0044427,GO:0044428,GO:0044446,GO:0044454,GO:…	ko:K11672
EXL95783.1	Src homology 3 domains		0	SP	1	1	FALSE	FALSE	noTP	Cell_membrane	extr	Plasma membrane	Classical_membrane		Non-effector	0			S	-	-
EXL95837.1	belongs to the flavoprotein pyridine nucleotide cytochrome reductase family		0	NO_SP	1	1	FALSE	FALSE	noTP	Endoplasmic_reticulum	cyto	Membrane bound Golgi			Non-effector	0	reduced_virulence		I	GO:0003674,GO:0003824,GO:0003958,GO:0005575,GO:0005622,GO:0005623,GO:0005737,GO:0005739,GO:0005740,GO:0005741,GO:0005783,GO:0005789,GO:0006066,GO:0006091,GO:0006629,GO:0006694,GO:0006696,GO:0008150,GO:0008152,GO:0008202,GO:0008204,GO:0008610,GO:0009055,GO:0009058,GO:0009987,GO:0012505,GO:0016020,GO:0016125,GO:0016126,GO:0016128,GO:0016129,GO:0016491,GO:0016651,GO:0016653,GO:0019867,GO:0022900,GO:…	ko:K00327
EXL96060.1	Belongs to the peptidase S8 family	Y	0	SP	0	0	FALSE	FALSE	SP	Extracellular	extr	Membrane bound Extracellular (Secreted)	Classical_secreted		Non-effector	0	unaffected_pathogenicity		O	GO:0002252,GO:0002253,GO:0002376,GO:0002682,GO:0002684,GO:0003674,GO:0003824,GO:0004175,GO:0004252,GO:0005488,GO:0005575,GO:0005576,GO:0006508,GO:0006516,GO:0006807,GO:0006955,GO:0006956,GO:0006959,GO:0008150,GO:0008152,GO:0008233,GO:0008236,GO:0009056,GO:0009057,GO:0009100,GO:0009405,GO:0009605,GO:0009607,GO:0009987,GO:0016787,GO:0017171,GO:0019538,GO:0019863,GO:0019865,GO:0020012,GO:0030163,GO:…	ko:K18549
EXL96114.1	Key enzyme for ketone body catabolism. Transfers the CoA moiety from succinate to acetoacetate. Formation of the enzyme-CoA intermediate proceeds via an unstable anhydride species formed between the carboxylate groups of the enzyme and substrate	Y	0	NO_SP	0	0	FALSE	FALSE	noTP	Cytoplasm	cyto_nucl	Mitochondrial			Cytoplasmic effector	0			H	-	ko:K01027
EXL96149.1	to glyoxylate induced protein	Y	0	NO_SP	0	0	FALSE	FALSE	noTP	Cytoplasm	mito	Cytoplasmic			Non-effector	0			S	-	ko:K14977
EXL96177.1	-	Y	0	SP	0	0	FALSE	FALSE	SP	Extracellular	mito	Extracellular (Secreted)	Classical_secreted		Cytoplasmic effector	0		Y	-	-	-
EXL96227.1	FAD binding domain	Y	0	SP	0	0	FALSE	FALSE	SP	Extracellular	extr	Membrane bound Mitochondrial	Classical_secreted		Non-effector	0			S	-	ko:K15393
EXL96282.1	Acyl-CoA thioesterase	Y	0	NO_SP	0	0	FALSE	FALSE	noTP	Cytoplasm	nucl	Nuclear			Non-effector	0			I	GO:0003674,GO:0003824,GO:0005575,GO:0005622,GO:0005623,GO:0005737,GO:0005739,GO:0005777,GO:0005782,GO:0006082,GO:0006139,GO:0006163,GO:0006629,GO:0006631,GO:0006635,GO:0006637,GO:0006725,GO:0006732,GO:0006753,GO:0006790,GO:0006793,GO:0006796,GO:0006807,GO:0008150,GO:0008152,GO:0009056,GO:0009062,GO:0009117,GO:0009150,GO:0009259,GO:0009987,GO:0016042,GO:0016054,GO:0016289,GO:0016787,GO:0016788,GO:…	ko:K01068,ko:K11992
EXL96348.1	NmrA-like family	Y	0	NO_SP	0	0	FALSE	FALSE	noTP	Cytoplasm	cyto	Membrane bound Endoplasmic reticulum			Non-effector	0	reduced_virulence__unaffected_pathogenicity		GM	-	-
EXL96409.1	Histidine phosphatase superfamily (branch 1)	Y	0	SP	0	0	FALSE	FALSE	SP	Extracellular	mito	Extracellular (Secreted)	Classical_secreted		Non-effector	0	reduced_virulence		G	GO:0005575,GO:0005622,GO:0005623,GO:0005634,GO:0005737,GO:0043226,GO:0043227,GO:0043229,GO:0043231,GO:0044424,GO:0044464	-
EXL96412.1	Belongs to the class-IV pyridoxal-phosphate-dependent aminotransferase family		0	NO_SP	0	0	FALSE	FALSE	noTP	Peroxisome	cyto	Cytoplasmic			Non-effector	0	unaffected_pathogenicity		E	-	ko:K00826
EXL96434.1	Domain of unknown function (DUF1989)		0	NO_SP	0	0	FALSE	FALSE	noTP	Cytoplasm	mito	Mitochondrial			Non-effector	0			S	-	-
EXL96471.1	-		0	NO_SP	0	0	FALSE	FALSE	noTP	Cytoplasm	cyto	Cytoplasmic			Non-effector	0	unaffected_pathogenicity		-	-	-
EXL96480.1	Belongs to the alpha-IPM synthase homocitrate synthase family	Y	0	NO_SP	0	0	FALSE	FALSE	noTP	Cytoplasm	cyto	Cytoplasmic			Non-effector	0	reduced_virulence		H	-	ko:K01655
EXL96542.1	Anaphase-promoting complex subunit 11 RING-H2 finger	Y	0	NO_SP	0	0	FALSE	FALSE	noTP	Nucleus	nucl	Nuclear			Cytoplasmic effector	0			O	-	-
EXL96576.1	NADPH:quinone reductase activity	Y	0	NO_SP	0	0	FALSE	FALSE	noTP	Cytoplasm	cyto	Membrane bound Peroxisomal			Non-effector	0			C	-	-
EXL96678.1	Belongs to the peptidase S8 family		0	SP	0	0	FALSE	FALSE	SP	Extracellular	cyto	Cytoplasmic	Classical_secreted		Non-effector	0	reduced_virulence		O	GO:0000003,GO:0000322,GO:0000323,GO:0000324,GO:0000328,GO:0000746,GO:0000747,GO:0003674,GO:0003824,GO:0004175,GO:0004252,GO:0005488,GO:0005575,GO:0005622,GO:0005623,GO:0005737,GO:0005773,GO:0005775,GO:0005783,GO:0006508,GO:0006807,GO:0006914,GO:0006950,GO:0006996,GO:0007033,GO:0007039,GO:0007154,GO:0008150,GO:0008152,GO:0008233,GO:0008236,GO:0009056,GO:0009057,GO:0009267,GO:0009605,GO:0009653,GO:…	ko:K01336
EXL96707.1	Glycosyl hydrolases family 16		0	SP	1	1	FALSE	FALSE	SP	Extracellular	extr	Membrane bound Extracellular (Secreted)	Classical_membrane	GH16_18	Non-effector	0			G	-	-
EXL96740.1	N-terminal domain of oxidoreductase		0	NO_SP	0	0	FALSE	FALSE	noTP	Peroxisome	cyto	Cytoplasmic			Non-effector	0	reduced_virulence		S	-	ko:K07119
EXL96789.1	NAD(P)H-binding		0	NO_SP	0	0	FALSE	FALSE	noTP	Cytoplasm	cyto	Cytoplasmic			Non-effector	0			GM	-	-
EXL96813.1	Belongs to the AAA ATPase family		0	NO_SP	0	0	FALSE	FALSE	noTP	Cytoplasm	nucl	Nuclear			Cytoplasmic effector	0	lethal		O	GO:0000166,GO:0000502,GO:0003674,GO:0003824,GO:0005488,GO:0005515,GO:0005524,GO:0005575,GO:0005622,GO:0005623,GO:0005634,GO:0005737,GO:0005829,GO:0005838,GO:0006355,GO:0006357,GO:0006508,GO:0006511,GO:0006807,GO:0006950,GO:0007088,GO:0007346,GO:0008134,GO:0008144,GO:0008150,GO:0008152,GO:0008540,GO:0009056,GO:0009057,GO:0009889,GO:0009891,GO:0009893,GO:0009894,GO:0009896,GO:0009987,GO:0010033,GO:…	ko:K03065
EXL96858.1	fructose-bisphosphate aldolase		0	NO_SP	0	0	FALSE	FALSE	noTP	Cytoplasm	cyto	Cytoplasmic			Non-effector	0	reduced_virulence		G	GO:0003674,GO:0003824,GO:0004332,GO:0005488,GO:0005575,GO:0005618,GO:0005622,GO:0005623,GO:0005737,GO:0005739,GO:0005829,GO:0005886,GO:0005975,GO:0005996,GO:0006006,GO:0006007,GO:0006082,GO:0006090,GO:0006091,GO:0006094,GO:0006096,GO:0006139,GO:0006163,GO:0006164,GO:0006165,GO:0006725,GO:0006732,GO:0006733,GO:0006734,GO:0006735,GO:0006753,GO:0006754,GO:0006757,GO:0006793,GO:0006796,GO:0006807,GO:…	ko:K01192,ko:K01624
EXL96873.1	Hydrolyzes ATP, and can also hydrolyze GTP with lower efficiency. Has lower affinity for GTP		0	NO_SP	0	0	FALSE	FALSE	noTP	Cytoplasm	cyto	Cytoplasmic			Cytoplasmic effector	0			J	GO:0000166,GO:0001882,GO:0001883,GO:0003674,GO:0003824,GO:0005488,GO:0005525,GO:0005575,GO:0005622,GO:0005623,GO:0005737,GO:0005739,GO:0016462,GO:0016787,GO:0016817,GO:0016818,GO:0016887,GO:0017076,GO:0017111,GO:0019001,GO:0032549,GO:0032550,GO:0032553,GO:0032555,GO:0032561,GO:0035639,GO:0036094,GO:0043167,GO:0043168,GO:0043226,GO:0043227,GO:0043229,GO:0043231,GO:0044424,GO:0044444,GO:0044464,GO:…	ko:K06942,ko:K19788
EXL96944.1	cell wall glucanase		0	NO_SP	0	0	FALSE	TRUE	noTP	Cell_membrane	extr	Membrane bound Golgi	Classical_membrane	GH16_19	Cytoplasmic effector	0			G	GO:0000144,GO:0000399,GO:0003674,GO:0003824,GO:0005575,GO:0005576,GO:0005618,GO:0005622,GO:0005623,GO:0005737,GO:0005856,GO:0005886,GO:0005933,GO:0005935,GO:0005938,GO:0005940,GO:0005975,GO:0005976,GO:0006022,GO:0006030,GO:0006037,GO:0006040,GO:0006807,GO:0008150,GO:0008152,GO:0009277,GO:0009405,GO:0009986,GO:0009987,GO:0010383,GO:0016020,GO:0016043,GO:0016740,GO:0016757,GO:0017144,GO:0022610,GO:…	-
EXL97007.1	Dihydroxy-acid dehydratase	Y	0	NO_SP	0	0	FALSE	FALSE	noTP	Cytoplasm	cyto	Cytoplasmic			Non-effector	0	unaffected_pathogenicity__reduced_virulence		E	-	ko:K01687
EXL97018.1	-		0	NO_SP	0	0	FALSE	FALSE	noTP	Cell_membrane	pero	Cytoplasmic			Non-effector	0			-	-	-
EXL97025.1	to aldo-keto reductase AKR		0	NO_SP	0	0	FALSE	FALSE	noTP	Mitochondrion	mito	Membrane bound Mitochondrial			Non-effector	0	unaffected_pathogenicity		S	-	-
EXL97053.1	-	Y	0	NO_SP	0	0	FALSE	FALSE	noTP	Cytoplasm	nucl	Cytoplasmic			Non-effector	0			-	-	-
EXL97092.1	Glycosyl hydrolases family 2, sugar binding domain		0	NO_SP	0	0	FALSE	FALSE	noTP	Cytoplasm	cyto_nucl	Cytoplasmic		GH2	Non-effector	0			G	-	-
EXL97093.1	fungal-type cell wall organization		0	SP	1	1	FALSE	FALSE	SP	Cell_membrane	extr	Plasma membrane	Classical_membrane		Non-effector	0	reduced_virulence		S	-	-
EXL97099.1	-		0	SP	1	1	FALSE	TRUE	SP	Cell_membrane	extr	Extracellular (Secreted)	Classical_membrane		Non-effector	0			-	-	-
EXL97120.1	Malate dehydrogenase, mitochondrial precursor	Y	0	NO_SP	0	0	FALSE	FALSE	noTP	Cytoplasm	cyto	Membrane bound Peroxisomal			Non-effector	0	reduced_virulence		C	GO:0001300,GO:0001302,GO:0003674,GO:0003676,GO:0003723,GO:0003729,GO:0003824,GO:0005488,GO:0005575,GO:0005622,GO:0005623,GO:0005737,GO:0005739,GO:0005759,GO:0006082,GO:0006091,GO:0006099,GO:0006101,GO:0006108,GO:0007568,GO:0007569,GO:0008150,GO:0008152,GO:0009060,GO:0009987,GO:0015980,GO:0016491,GO:0016614,GO:0016615,GO:0016616,GO:0016999,GO:0017144,GO:0019752,GO:0030060,GO:0031974,GO:0032502,GO:…	ko:K00026
EXL97137.1	-	Y	0	NO_SP	0	0	FALSE	FALSE	noTP	Cytoplasm	cysk	Cytoplasmic			Non-effector	0			-	-	-
EXL97156.1	to ribose 5-phosphate isomerase A		0	NO_SP	0	0	FALSE	FALSE	mTP	Mitochondrion	mito	Membrane bound Mitochondrial			Non-effector	0			G	GO:0003674,GO:0003824,GO:0004751,GO:0005575,GO:0005622,GO:0005623,GO:0005634,GO:0005737,GO:0005975,GO:0005996,GO:0006014,GO:0006081,GO:0006098,GO:0006139,GO:0006725,GO:0006732,GO:0006733,GO:0006739,GO:0006753,GO:0006766,GO:0006767,GO:0006793,GO:0006796,GO:0006807,GO:0008150,GO:0008152,GO:0008614,GO:0008615,GO:0009052,GO:0009058,GO:0009110,GO:0009117,GO:0009987,GO:0016853,GO:0016860,GO:0016861,GO:…	ko:K01807
EXL97158.1	Sulfite reductase subunit beta		0	NO_SP	0	0	FALSE	FALSE	noTP	Cytoplasm	cyto	Cytoplasmic			Non-effector	0	unaffected_pathogenicity		P	GO:0000096,GO:0000097,GO:0000103,GO:0000322,GO:0000323,GO:0000324,GO:0003674,GO:0003824,GO:0005575,GO:0005622,GO:0005623,GO:0005737,GO:0005773,GO:0006082,GO:0006520,GO:0006790,GO:0006807,GO:0008150,GO:0008152,GO:0008652,GO:0009058,GO:0009337,GO:0009403,GO:0009404,GO:0009987,GO:0010494,GO:0016002,GO:0016053,GO:0016491,GO:0016667,GO:0016673,GO:0017144,GO:0019419,GO:0019748,GO:0019752,GO:0032991,GO:…	ko:K00381
EXL97163.1	Amidohydrolase family		0	NO_SP	1	1	FALSE	FALSE	noTP	Plastid	cyto	Cytoplasmic			Non-effector	0	reduced_virulence		Q	-	-
EXL97195.1	RNA recognition motif		0	NO_SP	0	0	FALSE	FALSE	noTP	Cytoplasm	nucl	Cytoplasmic			Cytoplasmic effector	0			A	GO:0001731,GO:0002181,GO:0002183,GO:0003674,GO:0003676,GO:0003723,GO:0003725,GO:0003727,GO:0003729,GO:0003743,GO:0005488,GO:0005575,GO:0005622,GO:0005623,GO:0005737,GO:0005844,GO:0006412,GO:0006413,GO:0006518,GO:0006807,GO:0008135,GO:0008150,GO:0008152,GO:0009058,GO:0009059,GO:0009987,GO:0010467,GO:0010494,GO:0016043,GO:0016281,GO:0019538,GO:0022607,GO:0022613,GO:0022618,GO:0032991,GO:0033592,GO:…	ko:K03258
EXL97203.1	component of the eukaryotic translation initiation factor 3 (eIF-3) complex, which is involved in protein synthesis of a specialized repertoire of mRNAs and, together with other initiation factors, stimulates binding of mRNA and methionyl-tRNAi to the 40S ribosome. The eIF-3 complex specifically targets and initiates translation of a subset of mRNAs involved in cell proliferation	Y	0	NO_SP	2	2	FALSE	FALSE	noTP	Mitochondrion	nucl	Membrane bound Mitochondrial			Non-effector	0			J	GO:0003674,GO:0003676,GO:0003723,GO:0003743,GO:0005488,GO:0005575,GO:0005622,GO:0005623,GO:0005737,GO:0005852,GO:0006412,GO:0006413,GO:0006518,GO:0006807,GO:0008135,GO:0008150,GO:0008152,GO:0009058,GO:0009059,GO:0009987,GO:0010467,GO:0019538,GO:0032991,GO:0034641,GO:0034645,GO:0043043,GO:0043170,GO:0043603,GO:0043604,GO:0044237,GO:0044238,GO:0044249,GO:0044260,GO:0044267,GO:0044271,GO:0044424,GO:…	ko:K15029
EXL97223.1	-	Y	0	SP	0	0	FALSE	FALSE	SP	Extracellular	mito	Cytoplasmic	Classical_secreted		Cytoplasmic effector	0		Y	-	-	-
EXL97311.1	-	Y	0	SP	0	0	FALSE	FALSE	SP	Extracellular	cyto	Extracellular (Secreted)	Classical_secreted		Cytoplasmic effector	0		Y	-	-	-
EXL97333.1	Flavin containing amine oxidoreductase	Y	0	NO_SP	0	0	FALSE	FALSE	noTP	Peroxisome	cyto	Membrane bound Mitochondrial			Non-effector	0	reduced_virulence		H	-	-
EXL97359.1	Epoxide hydrolase N terminus	Y	0	NO_SP	0	0	FALSE	FALSE	noTP	Cytoplasm	cyto	Membrane bound Endoplasmic reticulum			Non-effector	0			S	-	ko:K01253
EXL97412.1	Belongs to the GMC oxidoreductase family		0	SP	0	0	FALSE	FALSE	SP	Extracellular	cyto	Membrane bound Mitochondrial	Classical_secreted	AA3_2	Non-effector	0	reduced_virulence		E	-	-
EXL97459.1	-	Y	0	NO_SP	0	0	FALSE	FALSE	noTP	Cytoplasm	nucl	Nuclear			Non-effector	0			-	-	-
EXL97568.1	Ricin-type beta-trefoil lectin domain-like	Y	0	NO_SP	0	0	FALSE	FALSE	noTP	Cytoplasm	nucl	Cytoplasmic		GH142	Non-effector	0	unaffected_pathogenicity		S	-	-
EXL97608.1	hexokinase		0	NO_SP	0	0	FALSE	FALSE	noTP	Cytoplasm	cyto	Cytoplasmic			Non-effector	0	unaffected_pathogenicity		G	GO:0000166,GO:0001302,GO:0001678,GO:0003674,GO:0003824,GO:0004340,GO:0004396,GO:0005488,GO:0005524,GO:0005575,GO:0005622,GO:0005623,GO:0005634,GO:0005737,GO:0005739,GO:0005829,GO:0005975,GO:0005996,GO:0006000,GO:0006002,GO:0006006,GO:0006007,GO:0006013,GO:0006081,GO:0006082,GO:0006090,GO:0006091,GO:0006096,GO:0006098,GO:0006139,GO:0006163,GO:0006164,GO:0006165,GO:0006355,GO:0006725,GO:0006732,GO:…	ko:K00844
EXL97688.1	alpha/beta hydrolase fold	Y	0	NO_SP	0	0	FALSE	FALSE	noTP	Cytoplasm	cyto	Cytoplasmic			Non-effector	0	reduced_virulence__unaffected_pathogenicity		V	-	-
EXL97718.1	Thioredoxin		0	NO_SP	0	0	FALSE	FALSE	noTP	Cytoplasm	cyto	Extracellular (Secreted)			Cytoplasmic effector	0			O	-	ko:K03671
EXL97783.1	to guanine deaminase	Y	0	NO_SP	0	0	FALSE	FALSE	noTP	Cytoplasm	cysk	Cytoplasmic			Non-effector	0			FQ	-	ko:K01487
EXL97786.1	NAD(P)H-binding	Y	0	NO_SP	0	0	FALSE	FALSE	noTP	Cytoplasm	extr	Membrane bound Mitochondrial			Non-effector	0			S	GO:0003674,GO:0003824,GO:0008150,GO:0008152,GO:0016491,GO:0055114	-
EXL97818.1	Nucleotide-diphospho-sugar transferase		0	NO_SP	0	0	FALSE	FALSE	noTP	Cytoplasm	cyto	Cytoplasmic			Cytoplasmic effector	0			S	-	-
EXL97916.1	Belongs to the peroxidase family. Peroxidase catalase subfamily		0	NO_SP	0	0	FALSE	FALSE	mTP	Mitochondrion	mito	Membrane bound Mitochondrial			Non-effector	0	unaffected_pathogenicity__reduced_virulence		Q	GO:0000003,GO:0000302,GO:0003674,GO:0003824,GO:0004096,GO:0004601,GO:0005488,GO:0005575,GO:0005576,GO:0005622,GO:0005623,GO:0005737,GO:0005829,GO:0006950,GO:0006979,GO:0007154,GO:0008150,GO:0008152,GO:0009056,GO:0009266,GO:0009267,GO:0009408,GO:0009605,GO:0009628,GO:0009636,GO:0009987,GO:0009991,GO:0010035,GO:0016209,GO:0016491,GO:0016684,GO:0016999,GO:0017001,GO:0017144,GO:0019953,GO:0020037,GO:…	ko:K03782
EXL97934.1	Belongs to the major facilitator superfamily. Sugar transporter (TC 2.A.1.1) family	Y	0	NO_SP	6	6	FALSE	FALSE	noTP	Cell_membrane	plas	Plasma membrane	Classical_membrane		Non-effector	0	reduced_virulence		P	GO:0000322,GO:0000323,GO:0000324,GO:0003674,GO:0005215,GO:0005342,GO:0005351,GO:0005353,GO:0005354,GO:0005355,GO:0005356,GO:0005358,GO:0005402,GO:0005575,GO:0005622,GO:0005623,GO:0005737,GO:0005739,GO:0005773,GO:0005783,GO:0005886,GO:0005887,GO:0005975,GO:0005996,GO:0006012,GO:0006810,GO:0006811,GO:0006812,GO:0006820,GO:0006950,GO:0007154,GO:0008028,GO:0008150,GO:0008152,GO:0008324,GO:0008509,GO:…	ko:K08139
EXL97991.1	Fructose-1-6-bisphosphatase, N-terminal domain		0	NO_SP	0	0	FALSE	FALSE	noTP	Cytoplasm	cyto	Cytoplasmic			Non-effector	0			G	-	ko:K01100
EXL98237.1	Nodulation protein S (NodS)	Y	0	NO_SP	0	0	FALSE	FALSE	noTP	Cytoplasm	cyto_nucl	Cytoplasmic			Non-effector	0	reduced_virulence		S	-	-
EXL98438.1	Zinc finger C-x8-C-x5-C-x3-H type (and similar)	Y	0	NO_SP	0	0	FALSE	FALSE	noTP	Nucleus	nucl	Cytoplasmic			Non-effector	0			S	-	-
EXL98454.1	M protein repeat protein		0	NO_SP	0	0	FALSE	FALSE	noTP	Cytoplasm	nucl	Nuclear			Cytoplasmic effector	0			S	-	-
EXL98463.1	Peptidyl-prolyl cis-trans isomerase		0	NO_SP	0	0	FALSE	FALSE	noTP	Peroxisome	cyto	Cytoplasmic			Cytoplasmic effector	0	reduced_virulence		O	GO:0000413,GO:0003674,GO:0003755,GO:0003824,GO:0006464,GO:0006807,GO:0008150,GO:0008152,GO:0009987,GO:0016853,GO:0016859,GO:0018193,GO:0018208,GO:0019538,GO:0036211,GO:0043170,GO:0043412,GO:0044237,GO:0044238,GO:0044260,GO:0044267,GO:0071704,GO:0140096,GO:1901564	ko:K05864
EXL98484.1	Belongs to the eukaryotic ribosomal protein P1 P2 family		0	NO_SP	0	0	FALSE	FALSE	noTP	Cytoplasm	cyto	Cytoplasmic			Cytoplasmic effector	0			J	GO:0001932,GO:0001934,GO:0002181,GO:0002182,GO:0003674,GO:0003735,GO:0005198,GO:0005575,GO:0005622,GO:0005623,GO:0005737,GO:0005829,GO:0005840,GO:0006412,GO:0006414,GO:0006518,GO:0006807,GO:0008047,GO:0008150,GO:0008152,GO:0009058,GO:0009059,GO:0009893,GO:0009987,GO:0010467,GO:0010562,GO:0010604,GO:0015934,GO:0019207,GO:0019209,GO:0019220,GO:0019222,GO:0019538,GO:0019887,GO:0022625,GO:0022626,GO:…	ko:K02942
EXL98516.1	Mannan endo-1,6-alpha-mannosidase		0	NO_SP	1	1	FALSE	FALSE	noTP	Cell_membrane	mito	Plasma membrane	Classical_membrane	GH76	Non-effector	0			G	-	ko:K08257
EXL98578.1	Belongs to the diphosphomevalonate decarboxylase family		0	NO_SP	0	0	FALSE	FALSE	noTP	Plastid	mito	Membrane bound Mitochondrial			Non-effector	0			I	GO:0003674,GO:0003824,GO:0004163,GO:0005575,GO:0005622,GO:0005623,GO:0005737,GO:0005829,GO:0006066,GO:0006084,GO:0006139,GO:0006163,GO:0006629,GO:0006637,GO:0006644,GO:0006694,GO:0006696,GO:0006720,GO:0006725,GO:0006732,GO:0006753,GO:0006790,GO:0006793,GO:0006796,GO:0006807,GO:0008150,GO:0008152,GO:0008202,GO:0008204,GO:0008299,GO:0008610,GO:0008654,GO:0009058,GO:0009117,GO:0009150,GO:0009240,GO:…	ko:K01597
EXL98586.1	NAD(P)H-binding	Y	0	NO_SP	0	0	FALSE	FALSE	noTP	Peroxisome	cyto	Cytoplasmic			Non-effector	0			S	-	-
EXL98703.1	Protein of unknown function (DUF3429)		0	NO_SP	4	4	FALSE	FALSE	mTP	Mitochondrion	nucl	Nuclear			Cytoplasmic effector	0	unaffected_pathogenicity		U	-	-
EXL98719.1	to 4-hydroxyphenylpyruvate dioxygenase	Y	0	NO_SP	0	0	FALSE	FALSE	noTP	Plastid	mito	Cytoplasmic			Non-effector	0			S	-	-
EXL98734.1	Belongs to the asparaginase 1 family		0	SP	0	0	FALSE	FALSE	SP	Extracellular	cyto	Cytoplasmic	Classical_secreted		Non-effector	0			E	GO:0003674,GO:0003824,GO:0004067,GO:0005575,GO:0005622,GO:0005623,GO:0005634,GO:0005635,GO:0005737,GO:0005783,GO:0006082,GO:0006520,GO:0006528,GO:0006530,GO:0006531,GO:0006807,GO:0006950,GO:0006995,GO:0007154,GO:0008150,GO:0008152,GO:0009056,GO:0009063,GO:0009064,GO:0009065,GO:0009066,GO:0009068,GO:0009267,GO:0009605,GO:0009986,GO:0009987,GO:0009991,GO:0012505,GO:0016054,GO:0016787,GO:0016810,GO:…	ko:K01424
EXL98745.1	Heterokaryon incompatibility protein (HET)	Y	0	NO_SP	0	0	FALSE	FALSE	noTP	Cytoplasm	nucl	Cytoplasmic			Non-effector	0			S	-	-
EXL98767.1	AIR carboxylase		0	NO_SP	0	0	FALSE	FALSE	noTP	Cytoplasm	cyto	Membrane bound Mitochondrial			Non-effector	0	reduced_virulence		F	-	ko:K11808
EXL98768.1	ankyrin repeat	Y	0	NO_SP	0	0	FALSE	FALSE	noTP	Cytoplasm	cyto	Cytoplasmic			Non-effector	0	unaffected_pathogenicity		S	-	-
EXL98853.1	Catalyzes the formation of formate and 2-keto-4- methylthiobutyrate (KMTB) from 1,2-dihydroxy-3-keto-5- methylthiopentene (DHK-MTPene)	Y	0	NO_SP	0	0	FALSE	FALSE	noTP	Cytoplasm	cyto_nucl	Cytoplasmic			Cytoplasmic effector	0			E	GO:0000096,GO:0000097,GO:0003674,GO:0003824,GO:0005575,GO:0005622,GO:0005623,GO:0005634,GO:0005737,GO:0006082,GO:0006520,GO:0006555,GO:0006790,GO:0006807,GO:0008150,GO:0008152,GO:0008652,GO:0009058,GO:0009066,GO:0009067,GO:0009086,GO:0009987,GO:0010308,GO:0010309,GO:0016053,GO:0016491,GO:0016701,GO:0016702,GO:0017144,GO:0019509,GO:0019752,GO:0043094,GO:0043102,GO:0043226,GO:0043227,GO:0043229,GO:…	ko:K08967
EXL98857.1	aminopeptidase		0	NO_SP	0	0	FALSE	FALSE	mTP	Mitochondrion	mito	Membrane bound Mitochondrial			Non-effector	0	reduced_virulence		E	GO:0000122,GO:0005575,GO:0005622,GO:0005623,GO:0005737,GO:0005829,GO:0006355,GO:0006357,GO:0008150,GO:0009889,GO:0009890,GO:0009892,GO:0009987,GO:0010035,GO:0010038,GO:0010039,GO:0010468,GO:0010556,GO:0010558,GO:0010605,GO:0010629,GO:0019219,GO:0019222,GO:0031323,GO:0031324,GO:0031326,GO:0031327,GO:0034395,GO:0034396,GO:0042221,GO:0044424,GO:0044444,GO:0044464,GO:0045892,GO:0045934,GO:0048519,GO:…	ko:K01262
EXL98879.1	Ribosomal protein L23, N-terminal domain		0	NO_SP	0	0	FALSE	FALSE	noTP	Nucleus	nucl	Nuclear			Cytoplasmic effector	0			J	GO:0000027,GO:0002181,GO:0003674,GO:0003676,GO:0003723,GO:0003735,GO:0005198,GO:0005488,GO:0005575,GO:0005622,GO:0005623,GO:0005737,GO:0005829,GO:0005840,GO:0006412,GO:0006518,GO:0006807,GO:0006996,GO:0008150,GO:0008152,GO:0009058,GO:0009059,GO:0009987,GO:0010467,GO:0015934,GO:0016043,GO:0019538,GO:0019843,GO:0022607,GO:0022613,GO:0022618,GO:0022625,GO:0022626,GO:0030684,GO:0030687,GO:0032991,GO:…	ko:K02893
EXL98897.1	Ribosomal L28e protein family		0	NO_SP	0	0	FALSE	FALSE	noTP	Nucleus	nucl	Nuclear			Cytoplasmic effector	0			J	GO:0002181,GO:0003674,GO:0003735,GO:0005198,GO:0005575,GO:0005622,GO:0005623,GO:0005737,GO:0005829,GO:0005840,GO:0006412,GO:0006518,GO:0006807,GO:0008150,GO:0008152,GO:0009058,GO:0009059,GO:0009987,GO:0010467,GO:0015934,GO:0019538,GO:0022625,GO:0022626,GO:0032991,GO:0034641,GO:0034645,GO:0043043,GO:0043170,GO:0043226,GO:0043228,GO:0043229,GO:0043232,GO:0043603,GO:0043604,GO:0044237,GO:0044238,GO:…	ko:K02903
EXL98905.1	Malate dehydrogenase	Y	0	NO_SP	0	0	FALSE	FALSE	noTP	Peroxisome	cyto	Cytoplasmic			Non-effector	0	reduced_virulence		C	-	ko:K00026
EXL98910.1	Phosphoribosylglycinamide synthetase, C domain		0	NO_SP	0	0	FALSE	FALSE	noTP	Cytoplasm	cyto	Cytoplasmic			Non-effector	0	reduced_virulence		F	GO:0003674,GO:0003824,GO:0004637,GO:0004641,GO:0006139,GO:0006144,GO:0006163,GO:0006164,GO:0006188,GO:0006189,GO:0006725,GO:0006753,GO:0006793,GO:0006796,GO:0006807,GO:0008150,GO:0008152,GO:0009058,GO:0009112,GO:0009113,GO:0009117,GO:0009123,GO:0009124,GO:0009126,GO:0009127,GO:0009150,GO:0009152,GO:0009156,GO:0009161,GO:0009165,GO:0009167,GO:0009168,GO:0009259,GO:0009260,GO:0009987,GO:0016874,GO:…	ko:K11788
EXL98917.1	RNA recognition motif		0	NO_SP	0	0	FALSE	FALSE	noTP	Nucleus	nucl	Nuclear			Cytoplasmic effector	0	lethal		A	GO:0000463,GO:0000470,GO:0003674,GO:0003676,GO:0003723,GO:0003729,GO:0005488,GO:0005575,GO:0005622,GO:0005623,GO:0005634,GO:0005730,GO:0006139,GO:0006364,GO:0006396,GO:0006725,GO:0006807,GO:0008150,GO:0008152,GO:0009987,GO:0010467,GO:0016070,GO:0016072,GO:0022613,GO:0030684,GO:0030687,GO:0031974,GO:0031981,GO:0032991,GO:0034470,GO:0034641,GO:0034660,GO:0042254,GO:0042273,GO:0043170,GO:0043226,GO:…	ko:K14573
EXL98945.1	Lipase (class 3)		0	SP	0	0	FALSE	FALSE	SP	Extracellular	mito	Membrane bound Extracellular (Secreted)	Classical_secreted		Non-effector	0	reduced_virulence		G	GO:0000322,GO:0000323,GO:0000324,GO:0000328,GO:0003674,GO:0003824,GO:0004620,GO:0004622,GO:0005575,GO:0005622,GO:0005623,GO:0005737,GO:0005773,GO:0005775,GO:0005783,GO:0006508,GO:0006575,GO:0006624,GO:0006629,GO:0006638,GO:0006644,GO:0006650,GO:0006658,GO:0006660,GO:0006793,GO:0006796,GO:0006807,GO:0006914,GO:0006996,GO:0007032,GO:0008150,GO:0008152,GO:0009056,GO:0009395,GO:0009987,GO:0010256,GO:…	ko:K17900
EXL98955.1	Belongs to the TCTP family		0	NO_SP	0	0	FALSE	FALSE	noTP	Cytoplasm	cyto	Cytoplasmic			Cytoplasmic effector	0			DZ	GO:0005575,GO:0005576,GO:0031012,GO:0044421,GO:0062039,GO:0062040	-
EXL98988.1	Belongs to the universal ribosomal protein uS11 family		0	NO_SP	0	0	FALSE	FALSE	noTP	Cytoplasm	mito	Cytoplasmic			Cytoplasmic effector	0			J	GO:0000028,GO:0000462,GO:0002181,GO:0003674,GO:0003676,GO:0003723,GO:0003729,GO:0003735,GO:0005198,GO:0005488,GO:0005575,GO:0005622,GO:0005623,GO:0005737,GO:0005829,GO:0005840,GO:0006139,GO:0006364,GO:0006396,GO:0006412,GO:0006518,GO:0006725,GO:0006807,GO:0006996,GO:0008150,GO:0008152,GO:0009058,GO:0009059,GO:0009987,GO:0010467,GO:0015935,GO:0016043,GO:0016070,GO:0016072,GO:0019538,GO:0019843,GO:…	ko:K02955
EXL98990.1	Ribosomal L30 N-terminal domain		0	NO_SP	0	0	FALSE	FALSE	noTP	Nucleus	nucl	Cytoplasmic			Cytoplasmic effector	0			J	GO:0000172,GO:0000447,GO:0000460,GO:0000462,GO:0000463,GO:0000466,GO:0000469,GO:0000470,GO:0000478,GO:0000479,GO:0002181,GO:0003674,GO:0003676,GO:0003723,GO:0003735,GO:0005198,GO:0005488,GO:0005575,GO:0005622,GO:0005623,GO:0005634,GO:0005730,GO:0005732,GO:0005737,GO:0005829,GO:0005840,GO:0006139,GO:0006364,GO:0006396,GO:0006399,GO:0006412,GO:0006518,GO:0006725,GO:0006807,GO:0008033,GO:0008150,GO:…	ko:K02937
EXL98993.1	component of the eukaryotic translation initiation factor 3 (eIF-3) complex, which is involved in protein synthesis of a specialized repertoire of mRNAs and, together with other initiation factors, stimulates binding of mRNA and methionyl-tRNAi to the 40S ribosome. The eIF-3 complex specifically targets and initiates translation of a subset of mRNAs involved in cell proliferation	Y	0	NO_SP	0	0	FALSE	FALSE	noTP	Nucleus	nucl	Membrane bound Mitochondrial			Non-effector	0			J	GO:0001732,GO:0002181,GO:0002183,GO:0003674,GO:0003676,GO:0003723,GO:0003729,GO:0003743,GO:0005488,GO:0005515,GO:0005575,GO:0005622,GO:0005623,GO:0005737,GO:0005852,GO:0006412,GO:0006413,GO:0006518,GO:0006807,GO:0008135,GO:0008150,GO:0008152,GO:0009058,GO:0009059,GO:0009987,GO:0010467,GO:0010494,GO:0016043,GO:0016282,GO:0019538,GO:0022607,GO:0022613,GO:0022618,GO:0031369,GO:0032991,GO:0034622,GO:…	ko:K03252
EXL99094.1	Catalyzes the hydrolysis of cutin, a polyester that forms the structure of plant cuticle	Y	0	SP	0	0	FALSE	TRUE	SP	Cell_membrane	extr	Membrane bound Extracellular (Secreted)	Classical_membrane	CE5	Non-effector	0	loss_of_pathogenicity		G	-	ko:K05972
EXL99104.1	to pyridine nucleotide-disulphide oxidoreductase		0	NO_SP	0	0	FALSE	FALSE	mTP	Mitochondrion	mito	Membrane bound Mitochondrial			Non-effector	0	reduced_virulence		S	GO:0003674,GO:0003824,GO:0005575,GO:0005622,GO:0005623,GO:0005634,GO:0005737,GO:0005739,GO:0005740,GO:0005743,GO:0006915,GO:0008150,GO:0008152,GO:0008219,GO:0009987,GO:0012501,GO:0016020,GO:0016491,GO:0016651,GO:0016667,GO:0016668,GO:0019866,GO:0031090,GO:0031966,GO:0031967,GO:0031975,GO:0043226,GO:0043227,GO:0043229,GO:0043231,GO:0044422,GO:0044424,GO:0044429,GO:0044444,GO:0044446,GO:0044464,GO:…	-
EXL99120.1	-	Y	0	SP	0	0	FALSE	FALSE	SP	Extracellular	mito	Extracellular (Secreted)	Classical_secreted		Cytoplasmic/apoplastic effector	1		Y	-	-	-
EXL99228.1	Glycosyl hydrolases family 18		0	SP	0	0	FALSE	FALSE	SP	Extracellular	extr	Membrane bound Lysosomal	Classical_secreted	GH18	Non-effector	0	reduced_virulence		G	-	ko:K01183,ko:K03859
EXL99239.1	Belongs to the aldehyde dehydrogenase family		0	NO_SP	0	0	FALSE	FALSE	noTP	Peroxisome	cyto	Membrane bound Peroxisomal			Non-effector	0	reduced_virulence		C	-	ko:K00128
EXL99456.1	Serine aminopeptidase, S33	Y	0	NO_SP	0	0	FALSE	FALSE	noTP	Cytoplasm	cysk	Cytoplasmic			Non-effector	0	effector_(plant_avirulence_determinant)		S	-	-
EXL99468.1	C-terminal domain of 1-Cys peroxiredoxin		0	NO_SP	0	0	FALSE	FALSE	noTP	Cytoplasm	cyto	Cytoplasmic			Cytoplasmic effector	0	unaffected_pathogenicity		O	GO:0000075,GO:0000077,GO:0000302,GO:0001302,GO:0003674,GO:0003824,GO:0004601,GO:0005488,GO:0005515,GO:0005575,GO:0005622,GO:0005623,GO:0005737,GO:0005829,GO:0005844,GO:0006109,GO:0006111,GO:0006139,GO:0006259,GO:0006355,GO:0006357,GO:0006457,GO:0006725,GO:0006807,GO:0006950,GO:0006974,GO:0006979,GO:0007154,GO:0007568,GO:0007569,GO:0008150,GO:0008152,GO:0008379,GO:0009056,GO:0009605,GO:0009636,GO:…	ko:K03386
EXL99495.1	to quinone oxidoreductase		0	NO_SP	0	0	FALSE	FALSE	noTP	Peroxisome	cyto	Cytoplasmic			Non-effector	0	reduced_virulence		C	-	ko:K00344
EXL99536.1	Belongs to the glycosyl hydrolase 5 (cellulase A) family		0	SP	0	0	FALSE	FALSE	SP	Extracellular	cyto	Membrane bound Mitochondrial	Classical_secreted	GH5_15	Non-effector	0	reduced_virulence		G	-	ko:K22277
EXL99653.1	Beta galactosidase small chain		0	NO_SP	0	0	FALSE	FALSE	noTP	Cytoplasm	cyto	Cytoplasmic		GH2	Non-effector	0	reduced_virulence__unaffected_pathogenicity		G	GO:0000287,GO:0003674,GO:0003824,GO:0004553,GO:0004565,GO:0005488,GO:0005515,GO:0005575,GO:0005975,GO:0005984,GO:0005988,GO:0005990,GO:0008150,GO:0008152,GO:0009056,GO:0009311,GO:0009313,GO:0009341,GO:0009987,GO:0015925,GO:0016052,GO:0016787,GO:0016798,GO:0031420,GO:0032991,GO:0042802,GO:0043167,GO:0043169,GO:0044237,GO:0044238,GO:0044248,GO:0044262,GO:0044275,GO:0046352,GO:0046872,GO:0071704,GO:…	ko:K01190
EXL99845.1	Belongs to the PdxS SNZ family		0	NO_SP	0	0	FALSE	FALSE	noTP	Cytoplasm	cyto	Cytoplasmic			Non-effector	0	reduced_virulence		H	GO:0000096,GO:0000097,GO:0003674,GO:0003824,GO:0003922,GO:0005575,GO:0005576,GO:0006082,GO:0006520,GO:0006534,GO:0006535,GO:0006563,GO:0006725,GO:0006766,GO:0006767,GO:0006790,GO:0006807,GO:0008150,GO:0008152,GO:0008614,GO:0008615,GO:0008652,GO:0009058,GO:0009069,GO:0009070,GO:0009110,GO:0009987,GO:0016053,GO:0016874,GO:0016879,GO:0016884,GO:0017144,GO:0018130,GO:0019344,GO:0019438,GO:0019752,GO:…	ko:K06215
EXL99852.1	Peptidase dimerisation domain		0	SP	0	0	FALSE	FALSE	SP	Extracellular	cyto	Endoplasmic reticulum	Classical_secreted		Non-effector	0			E	-	ko:K01438
EXL99872.1	RNA-binding component of the eukaryotic translation initiation factor 3 (eIF-3) complex, which is involved in protein synthesis of a specialized repertoire of mRNAs and, together with other initiation factors, stimulates binding of mRNA and methionyl-tRNAi to the 40S ribosome. The eIF-3 complex specifically targets and initiates translation of a subset of mRNAs involved in cell proliferation. Thi…		0	NO_SP	0	0	FALSE	FALSE	noTP	Nucleus	cyto	Cytoplasmic			Cytoplasmic effector	0	lethal		J	GO:0001732,GO:0002181,GO:0002183,GO:0002188,GO:0003674,GO:0003676,GO:0003723,GO:0003743,GO:0005488,GO:0005575,GO:0005622,GO:0005623,GO:0005737,GO:0005852,GO:0006412,GO:0006413,GO:0006415,GO:0006518,GO:0006807,GO:0008135,GO:0008150,GO:0008152,GO:0009058,GO:0009059,GO:0009987,GO:0010467,GO:0010494,GO:0016043,GO:0016282,GO:0019538,GO:0022411,GO:0022607,GO:0022613,GO:0022618,GO:0032984,GO:0032991,GO:…	ko:K03248,ko:K20304
EXM00017.1	Heat shock protein		0	NO_SP	0	0	FALSE	FALSE	mTP	Mitochondrion	mito	Membrane bound Mitochondrial			Non-effector	0	loss_of_pathogenicity		O	GO:0001405,GO:0003674,GO:0003824,GO:0005488,GO:0005515,GO:0005575,GO:0005576,GO:0005618,GO:0005622,GO:0005623,GO:0005737,GO:0005739,GO:0005740,GO:0005743,GO:0005744,GO:0005759,GO:0005886,GO:0006457,GO:0006605,GO:0006626,GO:0006790,GO:0006810,GO:0006839,GO:0006886,GO:0006950,GO:0006970,GO:0006996,GO:0007005,GO:0008104,GO:0008150,GO:0008152,GO:0009277,GO:0009295,GO:0009628,GO:0009847,GO:0009893,GO:…	ko:K04043
EXM00024.1	Proteasome subunit alpha type		0	NO_SP	0	0	FALSE	FALSE	noTP	Cytoplasm	mito	Cytoplasmic			Non-effector	0			O	GO:0000502,GO:0005575,GO:0005622,GO:0005623,GO:0005634,GO:0005737,GO:0005829,GO:0005839,GO:0006508,GO:0006511,GO:0006807,GO:0007088,GO:0007346,GO:0008150,GO:0008152,GO:0009056,GO:0009057,GO:0009896,GO:0009987,GO:0010498,GO:0010499,GO:0010564,GO:0010638,GO:0010965,GO:0012505,GO:0016020,GO:0019538,GO:0019773,GO:0019941,GO:0030071,GO:0030163,GO:0031331,GO:0031597,GO:0032270,GO:0032436,GO:0032991,GO:…	ko:K02729
EXM00029.1	gag-polyprotein putative aspartyl protease		0	NO_SP	0	0	FALSE	FALSE	noTP	Cytoplasm	cysk	Nuclear			Non-effector	0			L	GO:0000149,GO:0002790,GO:0003674,GO:0005488,GO:0005515,GO:0005575,GO:0005623,GO:0005886,GO:0006508,GO:0006511,GO:0006807,GO:0006810,GO:0008104,GO:0008150,GO:0008152,GO:0009056,GO:0009057,GO:0009306,GO:0009987,GO:0010498,GO:0015031,GO:0015833,GO:0016020,GO:0016192,GO:0017157,GO:0019538,GO:0019941,GO:0030163,GO:0031593,GO:0032182,GO:0032879,GO:0032940,GO:0033036,GO:0042886,GO:0043130,GO:0043161,GO:…	ko:K11885
EXM00034.1	Orotate phosphoribosyltransferase		0	NO_SP	0	0	FALSE	FALSE	noTP	Cytoplasm	cyto	Cytoplasmic			Cytoplasmic effector	0	reduced_virulence		F	GO:0003674,GO:0003824,GO:0004588,GO:0005575,GO:0005622,GO:0005623,GO:0005634,GO:0005737,GO:0006139,GO:0006206,GO:0006207,GO:0006213,GO:0006725,GO:0006807,GO:0008150,GO:0008152,GO:0009058,GO:0009112,GO:0009116,GO:0009119,GO:0009163,GO:0009987,GO:0016740,GO:0016757,GO:0016763,GO:0018130,GO:0019438,GO:0019856,GO:0034404,GO:0034641,GO:0034654,GO:0042455,GO:0043226,GO:0043227,GO:0043229,GO:0043231,GO:…	ko:K00762
EXM00052.1	Thioredoxin-like domain	Y	0	SP	1	1	FALSE	FALSE	SP	Endoplasmic_reticulum	extr	Membrane bound Extracellular (Secreted)	Classical_membrane		Non-effector	0	reduced_virulence__unaffected_pathogenicity		O	GO:0003674,GO:0003756,GO:0003824,GO:0005488,GO:0005515,GO:0005575,GO:0005622,GO:0005623,GO:0005737,GO:0005783,GO:0005789,GO:0006457,GO:0006508,GO:0006511,GO:0006621,GO:0006807,GO:0006950,GO:0008104,GO:0008150,GO:0008152,GO:0009056,GO:0009057,GO:0009987,GO:0010033,GO:0010243,GO:0010498,GO:0012505,GO:0016020,GO:0016491,GO:0016667,GO:0016671,GO:0016853,GO:0016860,GO:0016864,GO:0019153,GO:0019538,GO:…	ko:K13984,ko:K13996
EXM00105.1	Belongs to the GroES chaperonin family		0	NO_SP	0	0	FALSE	FALSE	noTP	Mitochondrion	mito	Mitochondrial			Cytoplasmic effector	0			O	GO:0003674,GO:0005488,GO:0005515,GO:0005575,GO:0005622,GO:0005623,GO:0005737,GO:0005739,GO:0005759,GO:0006457,GO:0006458,GO:0006605,GO:0006626,GO:0006810,GO:0006839,GO:0006886,GO:0006950,GO:0006986,GO:0006996,GO:0007005,GO:0008104,GO:0008150,GO:0009987,GO:0010033,GO:0015031,GO:0015833,GO:0016043,GO:0017038,GO:0022607,GO:0030150,GO:0031974,GO:0033036,GO:0033365,GO:0034613,GO:0034622,GO:0035966,GO:…	ko:K04078
EXM00157.1	Peptidase family M3		0	NO_SP	0	0	FALSE	FALSE	noTP	Cytoplasm	cyto	Membrane bound Mitochondrial			Non-effector	0			O	GO:0000322,GO:0000323,GO:0000324,GO:0003674,GO:0003824,GO:0004175,GO:0004222,GO:0005575,GO:0005622,GO:0005623,GO:0005737,GO:0005739,GO:0005740,GO:0005758,GO:0005773,GO:0005794,GO:0006508,GO:0006518,GO:0006807,GO:0008150,GO:0008152,GO:0008233,GO:0008237,GO:0009987,GO:0012505,GO:0016787,GO:0019538,GO:0031967,GO:0031970,GO:0031974,GO:0031975,GO:0034641,GO:0043170,GO:0043226,GO:0043227,GO:0043229,GO:…	ko:K01405,ko:K13726
EXM00206.1	Protein of unknown function (DUF2611)		0	NO_SP	1	0	FALSE	FALSE	SP	Mitochondrion	extr	Mitochondrial	Classical_membrane		Apoplastic effector	0			S	-	ko:K02143
EXM00261.1	to Phosphoserine phosphatase		0	NO_SP	0	0	FALSE	FALSE	noTP	Cytoplasm	cyto	Cytoplasmic			Non-effector	0	reduced_virulence		E	GO:0000123,GO:0003674,GO:0003824,GO:0005575,GO:0005622,GO:0005623,GO:0005634,GO:0005654,GO:0005737,GO:0006793,GO:0006796,GO:0008150,GO:0008152,GO:0009987,GO:0016311,GO:0016787,GO:0016788,GO:0016791,GO:0031248,GO:0031974,GO:0031981,GO:0032991,GO:0036409,GO:0036410,GO:0042578,GO:0043226,GO:0043227,GO:0043229,GO:0043231,GO:0043233,GO:0044237,GO:0044422,GO:0044424,GO:0044428,GO:0044446,GO:0044451,GO:…	-
EXM00272.1	Belongs to the nonaspanin (TM9SF) (TC 9.A.2) family	Y	0	SP	9	9	FALSE	FALSE	SP	Lysosome/Vacuole	plas	Membrane bound Lysosomal	Classical_membrane		Non-effector	0			U	GO:0000322,GO:0000323,GO:0000324,GO:0000329,GO:0001403,GO:0005575,GO:0005622,GO:0005623,GO:0005737,GO:0005768,GO:0005773,GO:0005774,GO:0006810,GO:0006873,GO:0006875,GO:0006878,GO:0007034,GO:0007124,GO:0008150,GO:0009987,GO:0012505,GO:0016020,GO:0016021,GO:0016049,GO:0016192,GO:0016197,GO:0019725,GO:0030003,GO:0030447,GO:0031090,GO:0031224,GO:0031410,GO:0031982,GO:0036267,GO:0040007,GO:0042592,GO:…	ko:K17086
EXM00304.1	Glutathione S-transferase, C-terminal domain		0	NO_SP	0	0	FALSE	FALSE	noTP	Cytoplasm	cyto	Cytoplasmic			Non-effector	0			O	GO:0003674,GO:0003824,GO:0004364,GO:0005575,GO:0005622,GO:0005623,GO:0005737,GO:0005777,GO:0006518,GO:0006575,GO:0006749,GO:0006790,GO:0006807,GO:0008150,GO:0008152,GO:0009636,GO:0009987,GO:0016740,GO:0016765,GO:0034641,GO:0042221,GO:0042579,GO:0043226,GO:0043227,GO:0043229,GO:0043231,GO:0043603,GO:0044237,GO:0044424,GO:0044444,GO:0044464,GO:0050896,GO:0051186,GO:0051716,GO:0070887,GO:0071704,GO:…	ko:K07393
EXM00306.1	Belongs to the ubiquitin-activating E1 family		0	NO_SP	0	1	FALSE	FALSE	noTP	Cytoplasm	cyto	Cytoplasmic			Non-effector	0	reduced_virulence		O	GO:0000166,GO:0000287,GO:0003674,GO:0003824,GO:0004839,GO:0005488,GO:0005524,GO:0005575,GO:0005622,GO:0005623,GO:0005634,GO:0005737,GO:0006464,GO:0006508,GO:0006511,GO:0006807,GO:0006950,GO:0006974,GO:0008144,GO:0008150,GO:0008152,GO:0008641,GO:0009056,GO:0009057,GO:0009987,GO:0016567,GO:0016874,GO:0016877,GO:0017076,GO:0019538,GO:0019941,GO:0030163,GO:0030554,GO:0032446,GO:0032553,GO:0032555,GO:…	ko:K03178
EXM00313.1	NAD(P)H-binding		0	NO_SP	0	0	FALSE	FALSE	mTP	Cytoplasm	cyto	Membrane bound Mitochondrial			Non-effector	0			G	-	-
EXM00358.1	-	Y	0	SP	0	1	FALSE	TRUE	SP	Cell_membrane	extr	Membrane bound Extracellular (Secreted)	Classical_membrane		Apoplastic effector	0			-	-	-
EXM00359.1	Acyl CoA binding protein		0	NO_SP	0	0	FALSE	FALSE	noTP	Cytoplasm	mito	Cytoplasmic			Cytoplasmic effector	0			I	-	ko:K08762
EXM00405.1	Belongs to the aldehyde dehydrogenase family		0	NO_SP	0	0	FALSE	FALSE	noTP	Cytoplasm	cyto	Cytoplasmic			Non-effector	0	reduced_virulence		E	-	-
EXM00415.1	Belongs to the class I-like SAM-binding methyltransferase superfamily. RsmB NOP family		0	NO_SP	0	0	FALSE	FALSE	noTP	Nucleus	cyto	Nuclear			Non-effector	0	loss_of_pathogenicity__reduced_virulence		J	GO:0000049,GO:0000302,GO:0001510,GO:0002097,GO:0002101,GO:0002127,GO:0002946,GO:0003674,GO:0003676,GO:0003723,GO:0003824,GO:0005488,GO:0005575,GO:0005622,GO:0005623,GO:0005634,GO:0005737,GO:0006139,GO:0006396,GO:0006399,GO:0006400,GO:0006725,GO:0006807,GO:0006950,GO:0006979,GO:0008033,GO:0008150,GO:0008152,GO:0008168,GO:0008173,GO:0008175,GO:0008757,GO:0009451,GO:0009636,GO:0009987,GO:0010035,GO:…	ko:K15334
EXM00420.1	DNA-directed RNA		0	NO_SP	0	0	FALSE	FALSE	noTP	Cytoplasm	nucl	Cytoplasmic			Non-effector	0			K	GO:0000428,GO:0005575,GO:0005622,GO:0005623,GO:0005634,GO:0005654,GO:0005665,GO:0005666,GO:0005730,GO:0005736,GO:0006139,GO:0006351,GO:0006360,GO:0006366,GO:0006383,GO:0006399,GO:0006725,GO:0006807,GO:0008150,GO:0008152,GO:0009058,GO:0009059,GO:0009304,GO:0009987,GO:0010467,GO:0016070,GO:0016591,GO:0018130,GO:0019438,GO:0030880,GO:0031974,GO:0031981,GO:0032774,GO:0032991,GO:0034641,GO:0034645,GO:…	ko:K03013
EXM00527.1	Belongs to the oxygen-dependent FAD-linked oxidoreductase family		0	SP	0	0	FALSE	FALSE	SP	Extracellular	extr	Membrane bound Mitochondrial	Classical_secreted	AA7	Non-effector	0	unaffected_pathogenicity		C	-	-
EXM00585.1	Belongs to the arginase family		0	NO_SP	0	0	FALSE	FALSE	noTP	Cytoplasm	cyto	Cytoplasmic			Non-effector	0	reduced_virulence		E	GO:0000050,GO:0003674,GO:0003824,GO:0004053,GO:0004857,GO:0005488,GO:0005575,GO:0005622,GO:0005623,GO:0005634,GO:0005737,GO:0005829,GO:0005937,GO:0006082,GO:0006520,GO:0006521,GO:0006525,GO:0006527,GO:0006560,GO:0006591,GO:0006807,GO:0008150,GO:0008152,GO:0008270,GO:0009056,GO:0009058,GO:0009063,GO:0009064,GO:0009065,GO:0009987,GO:0010121,GO:0010565,GO:0016054,GO:0016787,GO:0016810,GO:0016813,GO:…	ko:K01476
EXM00618.1	dehydrogenase complex E2 component		0	NO_SP	0	0	FALSE	FALSE	mTP	Mitochondrion	mito	Membrane bound Mitochondrial			Non-effector	0	unaffected_pathogenicity		C	-	ko:K00658
EXM00627.1	Belongs to the eukaryotic ribosomal protein eS26 family		0	NO_SP	0	0	FALSE	FALSE	noTP	Cytoplasm	mito	Cytoplasmic			Cytoplasmic/apoplastic effector	1	reduced_virulence		J	GO:0002181,GO:0003674,GO:0003676,GO:0003723,GO:0003729,GO:0003735,GO:0005198,GO:0005488,GO:0005575,GO:0005622,GO:0005623,GO:0005737,GO:0005829,GO:0005840,GO:0006403,GO:0006405,GO:0006407,GO:0006412,GO:0006518,GO:0006611,GO:0006807,GO:0006810,GO:0006886,GO:0006913,GO:0006996,GO:0008104,GO:0008150,GO:0008152,GO:0009058,GO:0009059,GO:0009987,GO:0010467,GO:0015031,GO:0015833,GO:0015931,GO:0015935,GO:…	ko:K02976
EXM00631.1	NOSIC (NUC001) domain		0	NO_SP	0	0	FALSE	FALSE	noTP	Nucleus	cyto	Nuclear			Cytoplasmic effector	0			AJ	GO:0000154,GO:0003674,GO:0003676,GO:0003723,GO:0003729,GO:0005488,GO:0005575,GO:0005622,GO:0005623,GO:0005634,GO:0005730,GO:0005732,GO:0006139,GO:0006364,GO:0006396,GO:0006725,GO:0006807,GO:0008150,GO:0008152,GO:0009451,GO:0009987,GO:0010467,GO:0016070,GO:0016072,GO:0022613,GO:0030515,GO:0030532,GO:0030684,GO:0030686,GO:0031428,GO:0031974,GO:0031981,GO:0032040,GO:0032991,GO:0034470,GO:0034641,GO:…	ko:K14564
EXM00652.1	Belongs to the AlaDH PNT family		0	NO_SP	0	0	FALSE	FALSE	mTP	Plastid	mito	Membrane bound Mitochondrial			Non-effector	0			E	GO:0003674,GO:0003676,GO:0003723,GO:0003729,GO:0003824,GO:0004753,GO:0004754,GO:0005488,GO:0005575,GO:0005622,GO:0005623,GO:0005737,GO:0006082,GO:0006091,GO:0006520,GO:0006553,GO:0006807,GO:0008150,GO:0008152,GO:0008652,GO:0009058,GO:0009066,GO:0009067,GO:0009085,GO:0009987,GO:0016053,GO:0016491,GO:0016645,GO:0016646,GO:0019752,GO:0019878,GO:0043436,GO:0044237,GO:0044238,GO:0044249,GO:0044281,GO:…	ko:K00290,ko:K11874
EXM00697.1	Required for the assembly and or stability of the 40S ribosomal subunit. Required for the processing of the 20S rRNA- precursor to mature 18S rRNA in a late step of the maturation of 40S ribosomal subunits		0	NO_SP	0	0	FALSE	FALSE	noTP	Cytoplasm	cyto	Cytoplasmic			Non-effector	0			J	GO:0000028,GO:0000447,GO:0000460,GO:0000461,GO:0000462,GO:0000466,GO:0000469,GO:0000478,GO:0000479,GO:0002181,GO:0003674,GO:0003735,GO:0005198,GO:0005575,GO:0005622,GO:0005623,GO:0005737,GO:0005829,GO:0005840,GO:0006139,GO:0006364,GO:0006396,GO:0006403,GO:0006405,GO:0006407,GO:0006412,GO:0006518,GO:0006611,GO:0006725,GO:0006807,GO:0006810,GO:0006886,GO:0006913,GO:0006996,GO:0008104,GO:0008150,GO:…	ko:K02998
EXM00759.1	Succinyl-CoA synthetase functions in the citric acid cycle (TCA), coupling the hydrolysis of succinyl-CoA to the synthesis of ATP and thus represents the only step of substrate- level phosphorylation in the TCA. The beta subunit provides nucleotide specificity of the enzyme and binds the substrate succinate, while the binding sites for coenzyme A and phosphate are found in the alpha subunit	Y	0	NO_SP	0	0	FALSE	FALSE	noTP	Cytoplasm	cyto	Cytoplasmic			Non-effector	0			C	GO:0003674,GO:0003824,GO:0004774,GO:0004775,GO:0005575,GO:0005622,GO:0005623,GO:0005737,GO:0005739,GO:0006082,GO:0006091,GO:0006099,GO:0006101,GO:0006104,GO:0006139,GO:0006163,GO:0006637,GO:0006725,GO:0006732,GO:0006753,GO:0006790,GO:0006793,GO:0006796,GO:0006807,GO:0008150,GO:0008152,GO:0009060,GO:0009117,GO:0009150,GO:0009259,GO:0009987,GO:0015980,GO:0016874,GO:0016877,GO:0016878,GO:0016999,GO:…	ko:K01900
EXM00777.1	GTP-binding protein ypt1		0	NO_SP	0	0	FALSE	FALSE	noTP	Golgi_apparatus	cyto_nucl	Cytoplasmic			Apoplastic/cytoplasmic effector	0	reduced_virulence		U	GO:0000045,GO:0000139,GO:0000149,GO:0000407,GO:0003674,GO:0003824,GO:0003924,GO:0005488,GO:0005515,GO:0005575,GO:0005622,GO:0005623,GO:0005737,GO:0005739,GO:0005783,GO:0005789,GO:0005794,GO:0005795,GO:0005801,GO:0006139,GO:0006401,GO:0006725,GO:0006807,GO:0006810,GO:0006886,GO:0006888,GO:0006890,GO:0006900,GO:0006906,GO:0006914,GO:0006996,GO:0007033,GO:0007154,GO:0007165,GO:0007264,GO:0008104,GO:…	ko:K07874
EXM00794.1	Gamma-glutamyltranspeptidase		0	SP	0	0	FALSE	FALSE	SP	Extracellular	cyto	Cytoplasmic	Classical_secreted		Non-effector	0	reduced_virulence		E	-	ko:K00681
EXM00795.1	Belongs to the class I-like SAM-binding methyltransferase superfamily. RNA M5U methyltransferase family	Y	0	NO_SP	0	0	FALSE	FALSE	mTP	Mitochondrion	mito	Membrane bound Mitochondrial			Non-effector	0			H	GO:0000014,GO:0001510,GO:0003674,GO:0003824,GO:0004518,GO:0004519,GO:0004520,GO:0004527,GO:0004529,GO:0004536,GO:0006139,GO:0006259,GO:0006396,GO:0006399,GO:0006400,GO:0006725,GO:0006807,GO:0008033,GO:0008150,GO:0008152,GO:0008168,GO:0008173,GO:0008175,GO:0008309,GO:0008409,GO:0009451,GO:0009987,GO:0010467,GO:0016070,GO:0016300,GO:0016740,GO:0016741,GO:0016787,GO:0016788,GO:0016796,GO:0016895,GO:…	ko:K15331
EXM00812.1	alcohol dehydrogenase		0	NO_SP	0	0	FALSE	FALSE	noTP	Peroxisome	cyto	Cytoplasmic			Non-effector	0	unaffected_pathogenicity		Q	GO:0000947,GO:0000955,GO:0003674,GO:0003824,GO:0004022,GO:0005575,GO:0005576,GO:0005622,GO:0005623,GO:0005634,GO:0005737,GO:0005739,GO:0005759,GO:0005886,GO:0005975,GO:0005996,GO:0006006,GO:0006066,GO:0006067,GO:0006068,GO:0006081,GO:0006082,GO:0006090,GO:0006091,GO:0006113,GO:0006115,GO:0006116,GO:0006117,GO:0006139,GO:0006163,GO:0006520,GO:0006566,GO:0006567,GO:0006725,GO:0006732,GO:0006733,GO:…	ko:K13953
EXM00822.1	Transcriptional repressor TCF25	Y	0	NO_SP	0	0	FALSE	FALSE	noTP	Nucleus	nucl	Nuclear			Non-effector	0			S	GO:0005575,GO:0005622,GO:0005623,GO:0005737,GO:0006412,GO:0006414,GO:0006417,GO:0006508,GO:0006511,GO:0006518,GO:0006807,GO:0008150,GO:0008152,GO:0009056,GO:0009057,GO:0009058,GO:0009059,GO:0009889,GO:0009987,GO:0010467,GO:0010468,GO:0010498,GO:0010556,GO:0010608,GO:0019222,GO:0019538,GO:0019941,GO:0030163,GO:0031323,GO:0031326,GO:0032268,GO:0032991,GO:0034248,GO:0034641,GO:0034645,GO:0043043,GO:…	-
EXM00834.1	60S ribosomal protein L26-1		0	NO_SP	0	0	FALSE	FALSE	noTP	Cytoplasm	mito	Cytoplasmic			Cytoplasmic effector	0			J	GO:0002181,GO:0003674,GO:0003676,GO:0003723,GO:0003735,GO:0005198,GO:0005488,GO:0005575,GO:0005622,GO:0005623,GO:0005737,GO:0005829,GO:0005840,GO:0006412,GO:0006518,GO:0006807,GO:0008150,GO:0008152,GO:0009058,GO:0009059,GO:0009987,GO:0010467,GO:0015934,GO:0019538,GO:0022613,GO:0022625,GO:0022626,GO:0032991,GO:0034641,GO:0034645,GO:0042254,GO:0042273,GO:0043043,GO:0043170,GO:0043226,GO:0043228,GO:…	ko:K02898
EXM00860.1	CS domain		0	NO_SP	0	0	FALSE	FALSE	noTP	Cytoplasm	cyto	Cytoplasmic			Cytoplasmic effector	0			O	GO:0003674,GO:0005488,GO:0005515,GO:0005575,GO:0005622,GO:0005623,GO:0005634,GO:0005737,GO:0006457,GO:0008150,GO:0009889,GO:0009891,GO:0009893,GO:0009987,GO:0010556,GO:0010557,GO:0010604,GO:0010638,GO:0019219,GO:0019222,GO:0031323,GO:0031325,GO:0031326,GO:0031328,GO:0032204,GO:0032206,GO:0032210,GO:0032212,GO:0033043,GO:0033044,GO:0043226,GO:0043227,GO:0043229,GO:0043231,GO:0043392,GO:0044092,GO:…	-
EXM00870.1	Cobalamin-independent synthase, N-terminal domain		0	NO_SP	0	0	FALSE	FALSE	noTP	Cytoplasm	cyto	Cytoplasmic			Non-effector	0	reduced_virulence		E	GO:0000096,GO:0000097,GO:0003674,GO:0003824,GO:0003871,GO:0005488,GO:0005575,GO:0005576,GO:0005618,GO:0005622,GO:0005623,GO:0005634,GO:0005737,GO:0005829,GO:0005886,GO:0006082,GO:0006139,GO:0006144,GO:0006520,GO:0006534,GO:0006555,GO:0006725,GO:0006790,GO:0006807,GO:0006950,GO:0008150,GO:0008152,GO:0008168,GO:0008172,GO:0008270,GO:0008652,GO:0008705,GO:0009058,GO:0009066,GO:0009067,GO:0009069,GO:…	ko:K00549
EXM00936.1	WSC domain	Y	0	SP	1	1	FALSE	FALSE	SP	Cell_membrane	extr	Membrane bound Extracellular (Secreted)	Classical_membrane		Apoplastic effector	0			S	-	ko:K11244
EXM00948.1	SEC14 cytosolic factor		0	NO_SP	0	0	FALSE	FALSE	noTP	Cytoplasm	cyto	Cytoplasmic			Non-effector	0	unaffected_pathogenicity		I	GO:0000003,GO:0000139,GO:0000226,GO:0003006,GO:0003674,GO:0005215,GO:0005319,GO:0005488,GO:0005543,GO:0005548,GO:0005575,GO:0005622,GO:0005623,GO:0005628,GO:0005634,GO:0005737,GO:0005794,GO:0005829,GO:0006629,GO:0006644,GO:0006650,GO:0006656,GO:0006657,GO:0006793,GO:0006796,GO:0006807,GO:0006810,GO:0006811,GO:0006820,GO:0006869,GO:0006892,GO:0006893,GO:0006896,GO:0006900,GO:0006996,GO:0007010,GO:…	-
EXM01020.1	tryptophan synthase		0	NO_SP	0	0	FALSE	FALSE	noTP	Peroxisome	mito	Cytoplasmic			Non-effector	0	lethal		E	GO:0000162,GO:0005575,GO:0005622,GO:0005623,GO:0005737,GO:0006082,GO:0006520,GO:0006568,GO:0006576,GO:0006586,GO:0006725,GO:0006807,GO:0008150,GO:0008152,GO:0008652,GO:0009058,GO:0009072,GO:0009073,GO:0009308,GO:0009309,GO:0009987,GO:0016053,GO:0018130,GO:0019438,GO:0019752,GO:0034641,GO:0042401,GO:0042430,GO:0042435,GO:0043436,GO:0044106,GO:0044237,GO:0044238,GO:0044249,GO:0044271,GO:0044281,GO:…	ko:K01694
EXM01029.1	Catalyzes the reversible transfer of the terminal phosphate group between ATP and AMP. Plays an important role in cellular energy homeostasis and in adenine nucleotide metabolism. Adenylate kinase activity is critical for regulation of the phosphate utilization and the AMP de novo biosynthesis pathways		0	NO_SP	0	0	FALSE	FALSE	noTP	Cytoplasm	cyto	Cytoplasmic			Cytoplasmic effector	0			F	GO:0000166,GO:0003674,GO:0003824,GO:0004017,GO:0005488,GO:0005524,GO:0005575,GO:0005622,GO:0005623,GO:0005737,GO:0005739,GO:0005740,GO:0005758,GO:0006139,GO:0006163,GO:0006164,GO:0006172,GO:0006259,GO:0006260,GO:0006261,GO:0006270,GO:0006725,GO:0006753,GO:0006793,GO:0006796,GO:0006807,GO:0008144,GO:0008150,GO:0008152,GO:0009058,GO:0009059,GO:0009117,GO:0009123,GO:0009124,GO:0009126,GO:0009127,GO:…	ko:K00939
EXM01050.1	Belongs to the class-I aminoacyl-tRNA synthetase family		0	NO_SP	0	0	FALSE	FALSE	noTP	Cytoplasm	cyto	Nuclear			Non-effector	0			J	GO:0000166,GO:0002181,GO:0003674,GO:0003824,GO:0004812,GO:0004822,GO:0005488,GO:0005524,GO:0005575,GO:0005622,GO:0005623,GO:0005737,GO:0005829,GO:0006082,GO:0006139,GO:0006399,GO:0006412,GO:0006418,GO:0006428,GO:0006518,GO:0006520,GO:0006725,GO:0006807,GO:0008144,GO:0008150,GO:0008152,GO:0009058,GO:0009059,GO:0009987,GO:0010467,GO:0016070,GO:0016874,GO:0016875,GO:0017076,GO:0019538,GO:0019752,GO:…	ko:K01870
EXM01138.1	Glycine-rich cell wall structural protein 1		0	NO_SP	0	0	FALSE	FALSE	noTP	Cytoplasm	nucl	Nuclear			Cytoplasmic effector	0			S	-	-
EXM01146.1	to integral membrane protein Ptm1	Y	0	SP	7	7	FALSE	FALSE	SP	Endoplasmic_reticulum	plas	Plasma membrane	Classical_membrane		Non-effector	0			U	GO:0003674,GO:0005575,GO:0005623,GO:0005886,GO:0005887,GO:0007154,GO:0007165,GO:0007166,GO:0008150,GO:0009987,GO:0016020,GO:0016021,GO:0023052,GO:0031224,GO:0031226,GO:0038023,GO:0044425,GO:0044459,GO:0044464,GO:0050789,GO:0050794,GO:0050896,GO:0051716,GO:0060089,GO:0065007,GO:0071944	-
EXM01209.1	Calponin homology (CH) domain		0	NO_SP	0	0	FALSE	FALSE	noTP	Cytoplasm	nucl	Membrane bound Mitochondrial			Non-effector	0	reduced_virulence		Z	GO:0003674,GO:0003779,GO:0005488,GO:0005515,GO:0005575,GO:0005622,GO:0005623,GO:0005737,GO:0005826,GO:0005856,GO:0005884,GO:0005886,GO:0005933,GO:0005934,GO:0005937,GO:0005938,GO:0006810,GO:0006897,GO:0006996,GO:0007010,GO:0007015,GO:0008064,GO:0008092,GO:0008150,GO:0009987,GO:0010639,GO:0015629,GO:0016020,GO:0016043,GO:0016192,GO:0022607,GO:0030029,GO:0030036,GO:0030046,GO:0030427,GO:0030479,GO:…	ko:K17275
EXM01220.1	ribosomal protein L18		0	NO_SP	0	0	FALSE	FALSE	noTP	Cytoplasm	mito	Cytoplasmic			Cytoplasmic effector	0			J	GO:0002181,GO:0003674,GO:0003676,GO:0003723,GO:0003735,GO:0005198,GO:0005488,GO:0005575,GO:0005622,GO:0005623,GO:0005737,GO:0005829,GO:0005840,GO:0006412,GO:0006518,GO:0006807,GO:0008150,GO:0008152,GO:0009058,GO:0009059,GO:0009987,GO:0010467,GO:0015934,GO:0019538,GO:0022625,GO:0022626,GO:0032991,GO:0034641,GO:0034645,GO:0043043,GO:0043170,GO:0043226,GO:0043228,GO:0043229,GO:0043232,GO:0043603,GO:…	ko:K02883
EXM01233.1	WD domain, G-beta repeat		0	NO_SP	0	0	FALSE	FALSE	noTP	Cytoplasm	cyto_nucl	Membrane bound Mitochondrial			Non-effector	0	reduced_virulence		T	GO:0000003,GO:0000746,GO:0000747,GO:0001403,GO:0001932,GO:0001934,GO:0001965,GO:0003674,GO:0005080,GO:0005092,GO:0005488,GO:0005515,GO:0005575,GO:0005622,GO:0005623,GO:0005737,GO:0005829,GO:0005840,GO:0006417,GO:0006446,GO:0006448,GO:0006950,GO:0007154,GO:0007155,GO:0007165,GO:0007186,GO:0007346,GO:0008150,GO:0009267,GO:0009268,GO:0009405,GO:0009605,GO:0009607,GO:0009628,GO:0009889,GO:0009890,GO:…	ko:K14753
EXM01248.1	Ribosomal protein L19e	Y	0	NO_SP	0	0	FALSE	FALSE	noTP	Nucleus	nucl	Nuclear			Cytoplasmic effector	0			J	GO:0002181,GO:0003674,GO:0003676,GO:0003723,GO:0003735,GO:0005198,GO:0005488,GO:0005575,GO:0005622,GO:0005623,GO:0005737,GO:0005829,GO:0005840,GO:0006412,GO:0006518,GO:0006807,GO:0008150,GO:0008152,GO:0009058,GO:0009059,GO:0009987,GO:0010467,GO:0015934,GO:0019538,GO:0022625,GO:0022626,GO:0030684,GO:0030687,GO:0032991,GO:0034641,GO:0034645,GO:0043043,GO:0043170,GO:0043226,GO:0043228,GO:0043229,GO:…	ko:K02885
EXM01275.1	Glycogen recognition site of AMP-activated protein kinase		0	NO_SP	0	2	FALSE	FALSE	noTP	Golgi_apparatus	E.R.	Membrane bound Endoplasmic reticulum			Non-effector	0			G	GO:0000749,GO:0000750,GO:0003674,GO:0003676,GO:0003677,GO:0005488,GO:0005575,GO:0005622,GO:0005623,GO:0005634,GO:0005737,GO:0005886,GO:0007154,GO:0007165,GO:0007186,GO:0008150,GO:0009987,GO:0010033,GO:0016020,GO:0019236,GO:0023052,GO:0031136,GO:0031137,GO:0031139,GO:0032005,GO:0042221,GO:0043226,GO:0043227,GO:0043229,GO:0043231,GO:0043900,GO:0043902,GO:0044424,GO:0044464,GO:0046999,GO:0048518,GO:…	-
EXM01287.1	Peptidase dimerisation domain		0	NO_SP	0	0	FALSE	FALSE	mTP	Mitochondrion	mito	Mitochondrial			Non-effector	0	reduced_virulence		E	GO:0003674,GO:0003824,GO:0005575,GO:0005576,GO:0005622,GO:0005623,GO:0005737,GO:0005739,GO:0006508,GO:0006518,GO:0006575,GO:0006749,GO:0006751,GO:0006790,GO:0006807,GO:0008150,GO:0008152,GO:0008233,GO:0008235,GO:0008237,GO:0008238,GO:0008242,GO:0009056,GO:0009987,GO:0016787,GO:0016805,GO:0019538,GO:0031012,GO:0034641,GO:0042219,GO:0043170,GO:0043171,GO:0043226,GO:0043227,GO:0043229,GO:0043231,GO:…	ko:K15428
EXM01370.1	Eukaryotic porin		0	NO_SP	0	0	FALSE	FALSE	noTP	Peroxisome	cyto	Membrane bound Mitochondrial			Non-effector	0			P	GO:0003674,GO:0005215,GO:0005216,GO:0005244,GO:0005253,GO:0005575,GO:0005622,GO:0005623,GO:0005737,GO:0005739,GO:0005740,GO:0005741,GO:0005886,GO:0006810,GO:0006811,GO:0006820,GO:0006839,GO:0006915,GO:0006996,GO:0007005,GO:0008150,GO:0008219,GO:0008308,GO:0008509,GO:0009987,GO:0012501,GO:0015075,GO:0015103,GO:0015267,GO:0015318,GO:0015698,GO:0015931,GO:0016020,GO:0016021,GO:0016043,GO:0019725,GO:…	ko:K15040
EXM01392.1	Protein of unknown function (DUF3405)	Y	0	NO_SP	1	1	FALSE	FALSE	SP	Golgi_apparatus	extr	Membrane bound Vacuolar	Classical_membrane		Non-effector	0			S	-	-
EXM01414.1	Glycosyltransferase family 31 protein	Y	0	NO_SP	0	0	FALSE	FALSE	SP	Golgi_apparatus	golg	Membrane bound Endoplasmic reticulum		GT31	Non-effector	0			O	-	-
EXM01464.1	component of the eukaryotic translation initiation factor 3 (eIF-3) complex, which is involved in protein synthesis of a specialized repertoire of mRNAs and, together with other initiation factors, stimulates binding of mRNA and methionyl-tRNAi to the 40S ribosome. The eIF-3 complex specifically targets and initiates translation of a subset of mRNAs involved in cell proliferation		0	NO_SP	0	0	FALSE	FALSE	noTP	Cytoplasm	cyto_nucl	Mitochondrial			Non-effector	0			J	GO:0001732,GO:0002181,GO:0002183,GO:0003674,GO:0003824,GO:0004843,GO:0005488,GO:0005515,GO:0005575,GO:0005622,GO:0005623,GO:0005737,GO:0005852,GO:0006412,GO:0006413,GO:0006464,GO:0006508,GO:0006518,GO:0006807,GO:0008150,GO:0008152,GO:0008233,GO:0008234,GO:0009058,GO:0009059,GO:0009987,GO:0010467,GO:0016043,GO:0016282,GO:0016787,GO:0019538,GO:0019783,GO:0022607,GO:0022613,GO:0022618,GO:0031369,GO:…	ko:K03249
EXM01527.1	60S ribosomal protein L5		0	NO_SP	0	0	FALSE	FALSE	noTP	Mitochondrion	nucl	Membrane bound Mitochondrial			Cytoplasmic effector	0			J	GO:0000027,GO:0002181,GO:0003674,GO:0003676,GO:0003723,GO:0003735,GO:0005198,GO:0005488,GO:0005575,GO:0005622,GO:0005623,GO:0005737,GO:0005829,GO:0005840,GO:0006412,GO:0006518,GO:0006807,GO:0006996,GO:0008097,GO:0008150,GO:0008152,GO:0009058,GO:0009059,GO:0009987,GO:0010467,GO:0015934,GO:0016043,GO:0019538,GO:0019843,GO:0022607,GO:0022613,GO:0022618,GO:0022625,GO:0022626,GO:0032991,GO:0034622,GO:…	ko:K02932
EXM01574.1	SHNi-TPR		0	NO_SP	0	0	FALSE	FALSE	noTP	Nucleus	cyto_nucl	Cytoplasmic			Cytoplasmic effector	0			BD	GO:0000123,GO:0000228,GO:0000785,GO:0000790,GO:0003674,GO:0005488,GO:0005515,GO:0005575,GO:0005622,GO:0005623,GO:0005634,GO:0005654,GO:0005694,GO:0006323,GO:0006325,GO:0006333,GO:0006334,GO:0006336,GO:0006338,GO:0006342,GO:0006348,GO:0006355,GO:0006464,GO:0006473,GO:0006475,GO:0006807,GO:0006996,GO:0008150,GO:0008152,GO:0009889,GO:0009890,GO:0009892,GO:0009987,GO:0010468,GO:0010556,GO:0010558,GO:…	ko:K11372
EXM01593.1	Belongs to the glutamine synthetase family	Y	0	NO_SP	0	0	FALSE	FALSE	noTP	Cytoplasm	cyto	Cytoplasmic			Non-effector	0	reduced_virulence		E	GO:0000003,GO:0000905,GO:0001896,GO:0003006,GO:0005575,GO:0005622,GO:0005623,GO:0005737,GO:0006725,GO:0007275,GO:0008150,GO:0008152,GO:0008219,GO:0009058,GO:0009403,GO:0009404,GO:0009889,GO:0009891,GO:0009893,GO:0009987,GO:0010720,GO:0010913,GO:0010914,GO:0012501,GO:0018130,GO:0019222,GO:0019438,GO:0019748,GO:0019954,GO:0022414,GO:0030154,GO:0030436,GO:0030582,GO:0030584,GO:0031323,GO:0031325,GO:…	-
EXM01614.1	Catalyzes the transfer of a two-carbon ketol group from a ketose donor to an aldose acceptor, via a covalent intermediate with the cofactor thiamine pyrophosphate	Y	0	NO_SP	0	0	FALSE	FALSE	noTP	Peroxisome	cysk	Cytoplasmic			Non-effector	0	loss_of_pathogenicity		G	GO:0003674,GO:0003824,GO:0004802,GO:0005575,GO:0005622,GO:0005623,GO:0005634,GO:0005737,GO:0006081,GO:0006098,GO:0006139,GO:0006725,GO:0006732,GO:0006733,GO:0006739,GO:0006753,GO:0006793,GO:0006796,GO:0006807,GO:0008150,GO:0008152,GO:0009052,GO:0009117,GO:0009987,GO:0016740,GO:0016744,GO:0019362,GO:0019637,GO:0019682,GO:0019693,GO:0034641,GO:0043226,GO:0043227,GO:0043229,GO:0043231,GO:0044237,GO:…	ko:K00615
EXM01641.1	Uncharacterised protein family (UPF0160)		0	NO_SP	0	0	FALSE	FALSE	mTP	Mitochondrion	mito	Membrane bound Mitochondrial			Non-effector	0			S	GO:0003674,GO:0003824,GO:0005575,GO:0005622,GO:0005623,GO:0005634,GO:0005737,GO:0005739,GO:0016787,GO:0043226,GO:0043227,GO:0043229,GO:0043231,GO:0044424,GO:0044444,GO:0044464	-
EXM01654.1	Splits internally a 1,3-beta-glucan molecule and transfers the newly generated reducing end (the donor) to the non- reducing end of another 1,3-beta-glucan molecule (the acceptor) forming a 1,3-beta linkage, resulting in the elongation of 1,3- beta-glucan chains in the cell wall		0	SP	0	1	FALSE	TRUE	SP	Cell_membrane	extr	Membrane bound Extracellular (Secreted)	Classical_membrane	GH72	Non-effector	0	unaffected_pathogenicity__loss_of_pathogenicity		G	GO:0000003,GO:0000271,GO:0003006,GO:0003674,GO:0003824,GO:0005575,GO:0005576,GO:0005618,GO:0005622,GO:0005623,GO:0005628,GO:0005737,GO:0005783,GO:0005886,GO:0005975,GO:0005976,GO:0006073,GO:0006074,GO:0006075,GO:0007049,GO:0008150,GO:0008152,GO:0009058,GO:0009059,GO:0009250,GO:0009272,GO:0009277,GO:0009653,GO:0009897,GO:0009986,GO:0009987,GO:0010383,GO:0010927,GO:0012505,GO:0016020,GO:0016021,GO:…	-
EXM01664.1	-	Y	0	NO_SP	0	0	FALSE	FALSE	noTP	Nucleus	nucl	Nuclear			Cytoplasmic effector	0			-	-	-
EXM01670.1	Belongs to the DEAD box helicase family		0	NO_SP	0	0	FALSE	FALSE	noTP	Cytoplasm	mito	Membrane bound Mitochondrial			Non-effector	0	unaffected_pathogenicity__increased_virulence_(hypervirulence)		A	GO:0002181,GO:0002184,GO:0003674,GO:0003724,GO:0003824,GO:0004004,GO:0004386,GO:0005575,GO:0005622,GO:0005623,GO:0005634,GO:0005635,GO:0005643,GO:0005681,GO:0005730,GO:0005737,GO:0005844,GO:0005933,GO:0005934,GO:0006139,GO:0006396,GO:0006403,GO:0006405,GO:0006406,GO:0006412,GO:0006415,GO:0006518,GO:0006611,GO:0006725,GO:0006807,GO:0006810,GO:0006886,GO:0006913,GO:0008026,GO:0008104,GO:0008150,GO:…	ko:K18655
EXM01674.1	gpi-anchored cell wall organization protein		0	SP	1	1	FALSE	TRUE	SP	Cell_membrane	extr	Peroxisomal	Classical_membrane		Non-effector	0	reduced_virulence		S	GO:0005575,GO:0005618,GO:0005623,GO:0005886,GO:0008150,GO:0009277,GO:0009987,GO:0016020,GO:0030312,GO:0035690,GO:0042221,GO:0042493,GO:0044464,GO:0050896,GO:0051716,GO:0070887,GO:0071944	-
EXM01692.1	HAD-hyrolase-like	Y	0	NO_SP	0	0	FALSE	FALSE	noTP	Cytoplasm	cysk	Membrane bound Mitochondrial			Non-effector	0			S	-	ko:K01560
EXM01778.1	-	Y	0	SP	0	0	FALSE	TRUE	SP	Cell_membrane	extr	Extracellular (Secreted)	Classical_membrane		Cytoplasmic effector	0			-	-	-
EXM01911.1	component of the eukaryotic translation initiation factor 3 (eIF-3) complex, which is involved in protein synthesis of a specialized repertoire of mRNAs and, together with other initiation factors, stimulates binding of mRNA and methionyl-tRNAi to the 40S ribosome. The eIF-3 complex specifically targets and initiates translation of a subset of mRNAs involved in cell proliferation		0	NO_SP	0	0	FALSE	FALSE	noTP	Cytoplasm	cyto	Cytoplasmic			Non-effector	0	loss_of_pathogenicity		J	GO:0001732,GO:0002181,GO:0002183,GO:0002188,GO:0003674,GO:0003676,GO:0003723,GO:0003743,GO:0005488,GO:0005575,GO:0005622,GO:0005623,GO:0005634,GO:0005737,GO:0005852,GO:0006412,GO:0006413,GO:0006518,GO:0006807,GO:0006950,GO:0006970,GO:0008135,GO:0008150,GO:0008152,GO:0009058,GO:0009059,GO:0009628,GO:0009987,GO:0010467,GO:0010494,GO:0016043,GO:0016282,GO:0019538,GO:0022607,GO:0022613,GO:0022618,GO:…	ko:K03246
EXM01912.1	C-1-tetrahydrofolate synthase, mitochondrial precursor		0	NO_SP	0	0	FALSE	FALSE	noTP	Mitochondrion	mito	Membrane bound Mitochondrial			Non-effector	0			H	GO:0000166,GO:0003674,GO:0003676,GO:0003677,GO:0003697,GO:0003824,GO:0004329,GO:0004477,GO:0004488,GO:0005488,GO:0005524,GO:0005575,GO:0005622,GO:0005623,GO:0005634,GO:0005737,GO:0005739,GO:0006082,GO:0006139,GO:0006144,GO:0006575,GO:0006725,GO:0006730,GO:0006732,GO:0006760,GO:0006766,GO:0006767,GO:0006807,GO:0008144,GO:0008150,GO:0008152,GO:0009058,GO:0009108,GO:0009110,GO:0009112,GO:0009113,GO:…	ko:K00288
EXM01976.1	Allergen Asp F7		0	SP	0	0	FALSE	FALSE	SP	Extracellular	cyto	Membrane bound Extracellular (Secreted)	Classical_secreted		Non-effector	0			S	-	-
EXM01981.1	Kelch motif		0	NO_SP	0	0	FALSE	FALSE	noTP	Nucleus	nucl	Cytoplasmic			Non-effector	0	reduced_virulence		S	-	-
EXM01985.1	FAD dependent oxidoreductase		0	NO_SP	0	0	FALSE	FALSE	noTP	Plastid	cyto	Cytoplasmic			Non-effector	0			E	-	-
EXM02098.1	to response regulator receiver domain protein		0	NO_SP	0	0	FALSE	FALSE	noTP	Cytoplasm	nucl	Cytoplasmic			Cytoplasmic effector	0			S	-	ko:K09958
EXM02114.1	Glutaredoxin		0	NO_SP	0	0	FALSE	FALSE	noTP	Mitochondrion	mito	Mitochondrial			Cytoplasmic effector	0			O	GO:0000302,GO:0000303,GO:0000305,GO:0003674,GO:0003824,GO:0004364,GO:0004601,GO:0004602,GO:0005575,GO:0005622,GO:0005623,GO:0005634,GO:0005737,GO:0005739,GO:0005829,GO:0006464,GO:0006518,GO:0006575,GO:0006749,GO:0006790,GO:0006801,GO:0006807,GO:0006950,GO:0006979,GO:0008150,GO:0008152,GO:0009636,GO:0009987,GO:0010035,GO:0010731,GO:0015035,GO:0015036,GO:0015037,GO:0015038,GO:0016209,GO:0016491,GO:…	ko:K03676
EXM02129.1	BAR domain		0	NO_SP	0	0	FALSE	FALSE	noTP	Nucleus	nucl	Nuclear			Cytoplasmic effector	0			U	GO:0000003,GO:0000278,GO:0000281,GO:0000746,GO:0000747,GO:0000910,GO:0000912,GO:0000915,GO:0003674,GO:0005085,GO:0005088,GO:0005089,GO:0005488,GO:0005515,GO:0005575,GO:0005622,GO:0005623,GO:0005737,GO:0005829,GO:0005856,GO:0005937,GO:0005938,GO:0006810,GO:0006897,GO:0006950,GO:0006970,GO:0006996,GO:0007009,GO:0007010,GO:0007015,GO:0007049,GO:0007154,GO:0007165,GO:0007264,GO:0008092,GO:0008150,GO:…	ko:K20120
EXM02159.1	Oxidoreductase family, C-terminal alpha/beta domain		0	NO_SP	0	0	FALSE	FALSE	noTP	Cytoplasm	cyto	Vacuolar			Non-effector	0	reduced_virulence		S	GO:0003674,GO:0003824,GO:0006139,GO:0006725,GO:0006732,GO:0006733,GO:0006739,GO:0006740,GO:0006753,GO:0006793,GO:0006796,GO:0006807,GO:0008150,GO:0008152,GO:0009117,GO:0009987,GO:0016491,GO:0019362,GO:0019637,GO:0034641,GO:0044237,GO:0044238,GO:0044281,GO:0046483,GO:0046496,GO:0051186,GO:0055086,GO:0055114,GO:0071704,GO:0072524,GO:1901360,GO:1901564	-
EXM02188.1	Dihydroxy-acid dehydratase		0	NO_SP	0	0	FALSE	FALSE	mTP	Mitochondrion	mito	Membrane bound Peroxisomal			Non-effector	0	reduced_virulence		E	GO:0003674,GO:0003824,GO:0004160,GO:0005575,GO:0005622,GO:0005623,GO:0005737,GO:0005739,GO:0006082,GO:0006520,GO:0006549,GO:0006551,GO:0006573,GO:0006807,GO:0008150,GO:0008152,GO:0008652,GO:0009058,GO:0009081,GO:0009082,GO:0009097,GO:0009099,GO:0009987,GO:0016053,GO:0016829,GO:0016835,GO:0016836,GO:0019752,GO:0043226,GO:0043227,GO:0043229,GO:0043231,GO:0043436,GO:0044237,GO:0044238,GO:0044249,GO:…	ko:K01687
EXM02194.1	-	Y	0	NO_SP	0	0	FALSE	FALSE	noTP	Cytoplasm	mito	Nuclear			Non-effector	0			-	-	-
EXM02227.1	FAD binding domain	Y	0	NO_SP	0	0	FALSE	FALSE	noTP	Cytoplasm	cyto	Cytoplasmic			Non-effector	0	unaffected_pathogenicity		C	-	-
EXM02242.1	Splits internally a 1,3-beta-glucan molecule and transfers the newly generated reducing end (the donor) to the non- reducing end of another 1,3-beta-glucan molecule (the acceptor) forming a 1,3-beta linkage, resulting in the elongation of 1,3- beta-glucan chains in the cell wall		0	SP	0	1	FALSE	TRUE	SP	Cell_membrane	extr	Membrane bound Extracellular (Secreted)	Classical_membrane	GH72|CBM43	Non-effector	0	reduced_virulence		G	GO:0000271,GO:0000935,GO:0000936,GO:0003674,GO:0003824,GO:0005575,GO:0005618,GO:0005623,GO:0005886,GO:0005975,GO:0005976,GO:0006073,GO:0006074,GO:0006075,GO:0008150,GO:0008152,GO:0009058,GO:0009059,GO:0009250,GO:0009272,GO:0009277,GO:0009897,GO:0009986,GO:0009987,GO:0010383,GO:0016020,GO:0016043,GO:0016051,GO:0016740,GO:0030312,GO:0030427,GO:0030428,GO:0031224,GO:0031225,GO:0031226,GO:0031233,GO:…	-
EXM02256.1	Heat shock protein		0	NO_SP	0	0	FALSE	FALSE	noTP	Cytoplasm	nucl	Membrane bound Golgi			Cytoplasmic effector	0	reduced_virulence		O	GO:0000166,GO:0000491,GO:0000492,GO:0000723,GO:0003674,GO:0003824,GO:0005488,GO:0005515,GO:0005524,GO:0005575,GO:0005618,GO:0005622,GO:0005623,GO:0005737,GO:0005739,GO:0005829,GO:0005886,GO:0006139,GO:0006259,GO:0006457,GO:0006458,GO:0006605,GO:0006626,GO:0006725,GO:0006807,GO:0006810,GO:0006839,GO:0006886,GO:0006950,GO:0006970,GO:0006996,GO:0007005,GO:0007154,GO:0007165,GO:0008104,GO:0008144,GO:…	ko:K04079
EXM02262.1	Transcription initiation factor TFIID	Y	0	NO_SP	0	0	FALSE	FALSE	noTP	Cytoplasm	cyto_nucl	Cytoplasmic			Non-effector	0	loss_of_pathogenicity		K	GO:0000123,GO:0000124,GO:0000428,GO:0000988,GO:0000990,GO:0000991,GO:0003674,GO:0003682,GO:0005198,GO:0005488,GO:0005515,GO:0005575,GO:0005622,GO:0005623,GO:0005634,GO:0005654,GO:0005667,GO:0005669,GO:0006139,GO:0006325,GO:0006338,GO:0006351,GO:0006352,GO:0006355,GO:0006357,GO:0006366,GO:0006367,GO:0006464,GO:0006473,GO:0006475,GO:0006725,GO:0006807,GO:0006996,GO:0008150,GO:0008152,GO:0009058,GO:…	ko:K03130
EXM02274.1	DnaJ molecular chaperone homology domain		0	NO_SP	0	0	FALSE	FALSE	noTP	Nucleus	nucl	Nuclear			Cytoplasmic effector	0	reduced_virulence		O	-	-
EXM02467.1	RNA recognition motif		0	NO_SP	0	0	FALSE	FALSE	noTP	Nucleus	nucl	Nuclear			Cytoplasmic/apoplastic effector	0	increased_virulence_(hypervirulence)		A	GO:0003674,GO:0003676,GO:0003723,GO:0005488,GO:0006325,GO:0006464,GO:0006473,GO:0006475,GO:0006807,GO:0006996,GO:0008150,GO:0008152,GO:0009987,GO:0016043,GO:0016569,GO:0016570,GO:0016573,GO:0018193,GO:0018205,GO:0018393,GO:0018394,GO:0019538,GO:0036211,GO:0043170,GO:0043412,GO:0043543,GO:0044237,GO:0044238,GO:0044260,GO:0044267,GO:0051276,GO:0071704,GO:0071840,GO:0097159,GO:1901363,GO:1901564	ko:K12897
EXM02488.1	protein transport protein Sec23	Y	0	NO_SP	0	0	FALSE	FALSE	noTP	Cytoplasm	cysk	Cytoplasmic			Non-effector	0			U	GO:0003400,GO:0003674,GO:0005096,GO:0005488,GO:0005575,GO:0005622,GO:0005623,GO:0005737,GO:0005783,GO:0005798,GO:0006508,GO:0006511,GO:0006807,GO:0006810,GO:0006886,GO:0006914,GO:0006950,GO:0008047,GO:0008104,GO:0008150,GO:0008152,GO:0008270,GO:0009056,GO:0009057,GO:0009987,GO:0010033,GO:0010243,GO:0010498,GO:0012505,GO:0012506,GO:0012507,GO:0015031,GO:0015833,GO:0016020,GO:0016236,GO:0019538,GO:…	ko:K14006
EXM02553.1	Belongs to the heat shock protein 70 family		0	NO_SP	0	0	FALSE	FALSE	noTP	Cytoplasm	cyto	Cytoplasmic			Non-effector	0	loss_of_pathogenicity		O	GO:0000166,GO:0000774,GO:0003674,GO:0005488,GO:0005524,GO:0005575,GO:0005622,GO:0005623,GO:0005737,GO:0005829,GO:0005844,GO:0006457,GO:0008144,GO:0008150,GO:0009405,GO:0009987,GO:0017076,GO:0030234,GO:0030554,GO:0032553,GO:0032555,GO:0032559,GO:0032991,GO:0033218,GO:0035639,GO:0035690,GO:0036094,GO:0042026,GO:0042221,GO:0042277,GO:0042493,GO:0043167,GO:0043168,GO:0044419,GO:0044424,GO:0044444,GO:…	ko:K09485,ko:K09489
EXM02563.1	eukaryotic translation initiation factor		0	NO_SP	0	0	FALSE	FALSE	noTP	Cytoplasm	cyto_nucl	Cytoplasmic			Cytoplasmic effector	0	unaffected_pathogenicity		J	GO:0002181,GO:0002182,GO:0002184,GO:0003674,GO:0003676,GO:0003723,GO:0003743,GO:0003746,GO:0005488,GO:0005575,GO:0005622,GO:0005623,GO:0005737,GO:0005739,GO:0005829,GO:0005840,GO:0006412,GO:0006413,GO:0006414,GO:0006415,GO:0006417,GO:0006446,GO:0006448,GO:0006449,GO:0006452,GO:0006518,GO:0006807,GO:0008079,GO:0008135,GO:0008150,GO:0008152,GO:0009058,GO:0009059,GO:0009889,GO:0009891,GO:0009893,GO:…	ko:K03263
EXM02574.1	Peptidase inhibitor I9		0	NO_SP	0	0	FALSE	FALSE	noTP	Cytoplasm	nucl	Mitochondrial			Cytoplasmic effector	0			S	GO:0000322,GO:0000323,GO:0000324,GO:0003674,GO:0004857,GO:0004866,GO:0005575,GO:0005622,GO:0005623,GO:0005634,GO:0005737,GO:0005773,GO:0005829,GO:0006996,GO:0007033,GO:0008150,GO:0009892,GO:0009987,GO:0010466,GO:0010605,GO:0010951,GO:0016043,GO:0019222,GO:0030162,GO:0030234,GO:0030414,GO:0031323,GO:0031324,GO:0032268,GO:0032269,GO:0042144,GO:0043086,GO:0043226,GO:0043227,GO:0043229,GO:0043231,GO:…	-
EXM02586.1	Inositol monophosphatase family		0	NO_SP	0	0	FALSE	FALSE	noTP	Cytoplasm	cyto	Cytoplasmic			Non-effector	0	loss_of_pathogenicity		G	GO:0003674,GO:0003824,GO:0005575,GO:0005622,GO:0005623,GO:0005634,GO:0005737,GO:0005975,GO:0006020,GO:0006066,GO:0006793,GO:0006796,GO:0007154,GO:0007165,GO:0008150,GO:0008152,GO:0008934,GO:0009056,GO:0009987,GO:0016311,GO:0016787,GO:0016788,GO:0016791,GO:0019637,GO:0019751,GO:0023052,GO:0042578,GO:0043226,GO:0043227,GO:0043229,GO:0043231,GO:0043647,GO:0044237,GO:0044238,GO:0044262,GO:0044281,GO:…	ko:K01092
EXM02587.1	Domain in the RNA-binding Lupus La protein; unknown function		0	NO_SP	0	0	FALSE	FALSE	noTP	Nucleus	nucl	Nuclear			Cytoplasmic effector	0			A	GO:0000049,GO:0000966,GO:0001682,GO:0003674,GO:0003676,GO:0003723,GO:0003725,GO:0003727,GO:0005488,GO:0005575,GO:0005622,GO:0005623,GO:0005634,GO:0005654,GO:0005730,GO:0005737,GO:0006139,GO:0006351,GO:0006353,GO:0006383,GO:0006386,GO:0006396,GO:0006399,GO:0006403,GO:0006405,GO:0006409,GO:0006611,GO:0006725,GO:0006807,GO:0006810,GO:0006886,GO:0006913,GO:0008033,GO:0008104,GO:0008150,GO:0008152,GO:…	ko:K11090
EXM02651.1	Serine carboxypeptidase S28		0	NO_SP	0	0	FALSE	FALSE	noTP	Endoplasmic_reticulum	cyto	Membrane bound Extracellular (Secreted)			Non-effector	0			O	-	-
EXM02652.1	Glycosyl hydrolase family 61	Y	0	SP	0	0	FALSE	FALSE	SP	Extracellular	cyto	Membrane bound Endoplasmic reticulum	Classical_secreted	AA9	Non-effector	0	unaffected_pathogenicity		O	-	ko:K19356
EXM02698.1	Zn_pept		0	SP	0	0	FALSE	FALSE	SP	Extracellular	extr	Membrane bound Mitochondrial	Classical_secreted		Non-effector	0			O	-	-
EXM02757.1	Belongs to the oxygen-dependent FAD-linked oxidoreductase family		0	SP	0	0	FALSE	FALSE	SP	Extracellular	extr	Membrane bound Lysosomal	Classical_secreted		Non-effector	0	unaffected_pathogenicity		C	-	-
EXM02811.1	Catalyzes the isomerization between 2-isopropylmalate and 3-isopropylmalate, via the formation of 2-isopropylmaleate		0	NO_SP	0	0	FALSE	FALSE	noTP	Cytoplasm	cyto	Cytoplasmic			Non-effector	0	loss_of_pathogenicity		E	GO:0003674,GO:0003824,GO:0003861,GO:0005575,GO:0005622,GO:0005623,GO:0005737,GO:0005829,GO:0006082,GO:0006520,GO:0006551,GO:0006807,GO:0008150,GO:0008152,GO:0008652,GO:0009058,GO:0009081,GO:0009082,GO:0009098,GO:0009987,GO:0010494,GO:0016053,GO:0016829,GO:0016835,GO:0016836,GO:0019752,GO:0032991,GO:0035770,GO:0036464,GO:0043226,GO:0043228,GO:0043229,GO:0043232,GO:0043436,GO:0044237,GO:0044238,GO:…	ko:K01702
EXM02827.1	Isocitrate dehydrogenase		0	NO_SP	0	0	FALSE	FALSE	mTP	Mitochondrion	mito	Membrane bound Mitochondrial			Non-effector	0	reduced_virulence		C	GO:0003674,GO:0003824,GO:0004448,GO:0004449,GO:0005575,GO:0005622,GO:0005623,GO:0005737,GO:0005739,GO:0005759,GO:0005962,GO:0006082,GO:0006091,GO:0006099,GO:0006101,GO:0006102,GO:0006520,GO:0006536,GO:0006537,GO:0006807,GO:0008150,GO:0008152,GO:0008652,GO:0009058,GO:0009060,GO:0009064,GO:0009084,GO:0009987,GO:0015980,GO:0016053,GO:0016491,GO:0016614,GO:0016616,GO:0016999,GO:0017144,GO:0019752,GO:…	ko:K00030
EXM02836.1	Elongation factor 2		0	NO_SP	0	0	FALSE	FALSE	noTP	Cytoplasm	cyto	Cytoplasmic			Non-effector	0	reduced_virulence		J	GO:0000166,GO:0001882,GO:0001883,GO:0002181,GO:0002182,GO:0003674,GO:0003676,GO:0003723,GO:0003746,GO:0003824,GO:0003924,GO:0005488,GO:0005525,GO:0005575,GO:0005618,GO:0005622,GO:0005623,GO:0005737,GO:0005829,GO:0005840,GO:0005886,GO:0006412,GO:0006414,GO:0006417,GO:0006448,GO:0006518,GO:0006807,GO:0008135,GO:0008144,GO:0008150,GO:0008152,GO:0009058,GO:0009059,GO:0009277,GO:0009889,GO:0009891,GO:…	ko:K03234
EXM02877.1	DJ-1/PfpI family		0	NO_SP	0	0	FALSE	FALSE	noTP	Cytoplasm	cyto	Cytoplasmic			Non-effector	0			S	-	-
EXM02888.1	Involved in the catabolism of quinolinic acid (QA)	Y	0	NO_SP	0	0	FALSE	FALSE	noTP	Cytoplasm	mito	Cytoplasmic			Non-effector	0			H	GO:0003674,GO:0003824,GO:0004514,GO:0005575,GO:0005622,GO:0005623,GO:0005634,GO:0005737,GO:0006082,GO:0006139,GO:0006520,GO:0006568,GO:0006576,GO:0006586,GO:0006725,GO:0006732,GO:0006733,GO:0006753,GO:0006793,GO:0006796,GO:0006807,GO:0008150,GO:0008152,GO:0009056,GO:0009058,GO:0009072,GO:0009108,GO:0009117,GO:0009165,GO:0009308,GO:0009435,GO:0009987,GO:0016054,GO:0016740,GO:0016757,GO:0016763,GO:…	ko:K00767
EXM02889.1	Belongs to the CRISP family		0	NO_SP	0	0	FALSE	FALSE	noTP	Mitochondrion	cyto	Membrane bound Mitochondrial			Non-effector	0	reduced_virulence		S	-	-
EXM02894.1	WD domain, G-beta repeat		0	NO_SP	0	0	FALSE	FALSE	noTP	Nucleus	cyto_nucl	Cytoplasmic			Non-effector	0	reduced_virulence		S	GO:0000027,GO:0003674,GO:0005488,GO:0005515,GO:0005575,GO:0005622,GO:0005623,GO:0005737,GO:0005829,GO:0006996,GO:0008150,GO:0009987,GO:0016043,GO:0022607,GO:0022613,GO:0022618,GO:0030684,GO:0030687,GO:0032991,GO:0034622,GO:0042254,GO:0042255,GO:0042273,GO:0043933,GO:0044085,GO:0044424,GO:0044444,GO:0044464,GO:0051082,GO:0065003,GO:0070925,GO:0071826,GO:0071840,GO:1990904	ko:K14818
EXM02915.1	Tubulin is the major constituent of microtubules. It binds two moles of GTP, one at an exchangeable site on the beta chain and one at a non-exchangeable site on the alpha chain		0	NO_SP	0	0	FALSE	FALSE	noTP	Cytoplasm	nucl	Cytoplasmic			Non-effector	0	chemistry_target:_resistance_to_chemical		Z	GO:0000003,GO:0000070,GO:0000166,GO:0000226,GO:0000235,GO:0000278,GO:0000280,GO:0000819,GO:0001882,GO:0001883,GO:0003674,GO:0003824,GO:0003924,GO:0005198,GO:0005200,GO:0005488,GO:0005525,GO:0005575,GO:0005622,GO:0005623,GO:0005634,GO:0005737,GO:0005815,GO:0005816,GO:0005818,GO:0005819,GO:0005828,GO:0005856,GO:0005874,GO:0005876,GO:0005880,GO:0005881,GO:0006810,GO:0006928,GO:0006996,GO:0007005,GO:…	ko:K07375
EXM02946.1	Belongs to the class-IV pyridoxal-phosphate-dependent aminotransferase family		0	NO_SP	0	0	FALSE	FALSE	mTP	Mitochondrion	mito	Membrane bound Mitochondrial			Non-effector	0	unaffected_pathogenicity		E	GO:0003674,GO:0003824,GO:0004084,GO:0005488,GO:0005575,GO:0005622,GO:0005623,GO:0005634,GO:0005737,GO:0005739,GO:0005759,GO:0006082,GO:0006520,GO:0006549,GO:0006551,GO:0006573,GO:0006807,GO:0008144,GO:0008150,GO:0008152,GO:0008483,GO:0008652,GO:0009056,GO:0009058,GO:0009063,GO:0009081,GO:0009082,GO:0009083,GO:0009097,GO:0009098,GO:0009099,GO:0009987,GO:0016053,GO:0016054,GO:0016740,GO:0016769,GO:…	ko:K00826
EXM02985.1	K homology RNA-binding domain		0	NO_SP	0	0	FALSE	FALSE	noTP	Cytoplasm	cyto_nucl	Nuclear			Non-effector	0			I	GO:0000003,GO:0000280,GO:0000322,GO:0000323,GO:0000324,GO:0000329,GO:0000749,GO:0000750,GO:0001965,GO:0003674,GO:0003676,GO:0003723,GO:0003729,GO:0005488,GO:0005515,GO:0005575,GO:0005622,GO:0005623,GO:0005737,GO:0005773,GO:0005774,GO:0005783,GO:0005789,GO:0005844,GO:0006325,GO:0006342,GO:0006348,GO:0006355,GO:0006403,GO:0006996,GO:0007049,GO:0007059,GO:0007127,GO:0007154,GO:0007165,GO:0007186,GO:…	-
EXM03019.1	Belongs to the heat shock protein 70 family		1	SP	0	0	FALSE	FALSE	SP	Endoplasmic_reticulum	extr	Membrane bound Endoplasmic reticulum			Non-effector	0	loss_of_pathogenicity		O	GO:0000003,GO:0000166,GO:0000271,GO:0000741,GO:0000742,GO:0000746,GO:0000747,GO:0003674,GO:0003824,GO:0005488,GO:0005515,GO:0005524,GO:0005575,GO:0005622,GO:0005623,GO:0005634,GO:0005635,GO:0005737,GO:0005783,GO:0005788,GO:0005938,GO:0005975,GO:0005976,GO:0006073,GO:0006508,GO:0006511,GO:0006605,GO:0006612,GO:0006613,GO:0006614,GO:0006616,GO:0006620,GO:0006807,GO:0006810,GO:0006886,GO:0006950,GO:…	ko:K09490
EXM03035.1	Catalyzes the phosphorylation of D-fructose 6-phosphate to fructose 1,6-bisphosphate by ATP, the first committing step of glycolysis		0	NO_SP	0	0	FALSE	FALSE	noTP	Peroxisome	cyto	Membrane bound Mitochondrial			Non-effector	0	reduced_virulence		G	GO:0000166,GO:0000426,GO:0001678,GO:0003674,GO:0003676,GO:0003723,GO:0003729,GO:0003824,GO:0003872,GO:0005488,GO:0005524,GO:0005575,GO:0005622,GO:0005623,GO:0005737,GO:0005739,GO:0005829,GO:0005945,GO:0005975,GO:0005996,GO:0006002,GO:0006006,GO:0006007,GO:0006082,GO:0006090,GO:0006091,GO:0006096,GO:0006139,GO:0006163,GO:0006164,GO:0006165,GO:0006725,GO:0006732,GO:0006733,GO:0006734,GO:0006735,GO:…	ko:K00850
EXM03050.1	to siroheme synthase		0	NO_SP	0	0	FALSE	FALSE	noTP	Plastid	mito	Membrane bound Mitochondrial			Non-effector	0	reduced_virulence__unaffected_pathogenicity		H	GO:0000103,GO:0003674,GO:0003824,GO:0004851,GO:0005575,GO:0005622,GO:0005623,GO:0005634,GO:0006725,GO:0006778,GO:0006779,GO:0006783,GO:0006790,GO:0006807,GO:0008150,GO:0008152,GO:0008168,GO:0008169,GO:0008757,GO:0009058,GO:0009987,GO:0016740,GO:0016741,GO:0018130,GO:0019354,GO:0019438,GO:0032259,GO:0033013,GO:0033014,GO:0034641,GO:0042168,GO:0042440,GO:0043226,GO:0043227,GO:0043229,GO:0043231,GO:…	ko:K00589
EXM03087.1	phosphoribosylformylglycinamidine synthase		0	NO_SP	0	0	FALSE	FALSE	noTP	Cytoplasm	cyto	Membrane bound Endoplasmic reticulum			Non-effector	0	reduced_virulence		F	GO:0003674,GO:0003824,GO:0004642,GO:0005575,GO:0005622,GO:0005623,GO:0005737,GO:0006139,GO:0006163,GO:0006164,GO:0006188,GO:0006189,GO:0006725,GO:0006753,GO:0006793,GO:0006796,GO:0006807,GO:0008150,GO:0008152,GO:0009058,GO:0009117,GO:0009123,GO:0009124,GO:0009126,GO:0009127,GO:0009150,GO:0009152,GO:0009156,GO:0009161,GO:0009165,GO:0009167,GO:0009168,GO:0009259,GO:0009260,GO:0009987,GO:0016874,GO:…	ko:K01952
EXM03110.1	-	Y	0	SP	0	0	FALSE	FALSE	SP	Nucleus	nucl	Mitochondrial			Non-effector	0			-	-	-
EXM03130.1	-	Y	0	NO_SP	0	0	FALSE	TRUE	noTP	Cell_membrane	extr	Extracellular (Secreted)	Classical_membrane		Apoplastic/cytoplasmic effector	1			-	-	-
EXM03167.1	Belongs to the TRAFAC class TrmE-Era-EngA-EngB-Septin- like GTPase superfamily. Septin GTPase family		0	NO_SP	0	0	FALSE	FALSE	noTP	Cytoplasm	mito	Cytoplasmic			Cytoplasmic effector	0	reduced_virulence		DUZ	GO:0000003,GO:0000082,GO:0000144,GO:0000166,GO:0000278,GO:0000280,GO:0000281,GO:0000399,GO:0000910,GO:0000912,GO:0000915,GO:0000917,GO:0000921,GO:0001400,GO:0001410,GO:0001411,GO:0001882,GO:0001883,GO:0001932,GO:0001934,GO:0003006,GO:0003674,GO:0005198,GO:0005488,GO:0005525,GO:0005543,GO:0005575,GO:0005618,GO:0005619,GO:0005622,GO:0005623,GO:0005628,GO:0005634,GO:0005737,GO:0005819,GO:0005826,GO:…	ko:K16945,ko:K16946
EXM03189.1	to FAD-dependent oxidoreductase		0	NO_SP	1	0	FALSE	FALSE	noTP	Golgi_apparatus	extr	Membrane bound Mitochondrial			Non-effector	0	reduced_virulence		C	GO:0003674,GO:0003824,GO:0005575,GO:0005622,GO:0005623,GO:0005737,GO:0005739,GO:0005783,GO:0005829,GO:0005886,GO:0006139,GO:0006457,GO:0006725,GO:0006732,GO:0006753,GO:0006793,GO:0006796,GO:0006807,GO:0006950,GO:0008150,GO:0008152,GO:0009117,GO:0009628,GO:0009987,GO:0012505,GO:0016020,GO:0016156,GO:0016491,GO:0016627,GO:0016628,GO:0019637,GO:0033554,GO:0034059,GO:0034641,GO:0034975,GO:0036293,GO:…	ko:K18561
EXM03207.1	Belongs to the glycosyl hydrolase 17 family		0	SP	0	1	FALSE	TRUE	SP	Cell_membrane	extr	Membrane bound Extracellular (Secreted)	Classical_membrane	GH17	Non-effector	0	unaffected_pathogenicity__reduced_virulence		G	-	ko:K01199
EXM03251.1	cornified envelope assembly	Y	0	NO_SP	0	0	FALSE	FALSE	noTP	Cytoplasm	mito	Nuclear			Cytoplasmic effector	0			S	-	-
EXM03313.1	Complex I intermediate-associated protein 30 (CIA30)	Y	0	NO_SP	0	0	FALSE	FALSE	noTP	Cell_membrane	cyto_mito	Cytoplasmic			Cytoplasmic effector	0	increased_virulence_(hypervirulence)		S	-	-
EXM03319.1	Belongs to the FBPase class 1 family	Y	0	NO_SP	0	0	FALSE	FALSE	noTP	Peroxisome	cyto	Cytoplasmic			Non-effector	0			G	GO:0000166,GO:0001558,GO:0003674,GO:0003824,GO:0005488,GO:0005575,GO:0005622,GO:0005623,GO:0005737,GO:0005829,GO:0005975,GO:0005984,GO:0005985,GO:0005986,GO:0005996,GO:0006000,GO:0006002,GO:0006006,GO:0006094,GO:0006109,GO:0006110,GO:0006111,GO:0006140,GO:0006793,GO:0006796,GO:0006950,GO:0007154,GO:0008144,GO:0008150,GO:0008152,GO:0009058,GO:0009267,GO:0009311,GO:0009312,GO:0009605,GO:0009889,GO:…	ko:K03841
EXM03328.1	homoserine dehydrogenase		0	NO_SP	0	0	FALSE	FALSE	noTP	Peroxisome	cyto	Membrane bound Mitochondrial			Non-effector	0			E	GO:0000096,GO:0000097,GO:0003674,GO:0003824,GO:0004072,GO:0004412,GO:0005575,GO:0005622,GO:0005623,GO:0005634,GO:0005737,GO:0006082,GO:0006520,GO:0006555,GO:0006566,GO:0006790,GO:0006793,GO:0006796,GO:0006807,GO:0008150,GO:0008152,GO:0008652,GO:0009058,GO:0009066,GO:0009067,GO:0009069,GO:0009070,GO:0009086,GO:0009088,GO:0009090,GO:0009092,GO:0009987,GO:0016053,GO:0016301,GO:0016310,GO:0016491,GO:…	ko:K00003
EXM03382.1	Belongs to the thiolase family	Y	0	NO_SP	0	0	FALSE	FALSE	noTP	Cytoplasm	cyto	Cytoplasmic			Non-effector	0	reduced_virulence		I	GO:0003674,GO:0003824,GO:0003985,GO:0003988,GO:0005575,GO:0005622,GO:0005623,GO:0005634,GO:0005737,GO:0005739,GO:0005777,GO:0005829,GO:0006066,GO:0006082,GO:0006629,GO:0006631,GO:0006635,GO:0006694,GO:0006696,GO:0008150,GO:0008152,GO:0008202,GO:0008204,GO:0008610,GO:0009056,GO:0009058,GO:0009062,GO:0009987,GO:0016042,GO:0016054,GO:0016125,GO:0016126,GO:0016128,GO:0016129,GO:0016407,GO:0016408,GO:…	ko:K00626
EXM03397.1	Thioredoxin		0	NO_SP	0	0	FALSE	FALSE	noTP	Cytoplasm	cyto	Mitochondrial			Non-effector	0			S	-	-
EXM03424.1	Antibiotic biosynthesis monooxygenase		0	NO_SP	0	0	FALSE	FALSE	noTP	Cytoplasm	nucl	Nuclear			Cytoplasmic effector	0			S	-	-
EXM03436.1	glycine-rich protein	Y	0	SP	1	2	FALSE	TRUE	SP	Cell_membrane	extr	Membrane bound Extracellular (Secreted)	Classical_membrane		Apoplastic effector	0			S	-	-
EXM03443.1	to soluble fumarate reductase		0	NO_SP	0	0	FALSE	FALSE	noTP	Cytoplasm	cyto	Membrane bound Endoplasmic reticulum			Non-effector	0	reduced_virulence		C	GO:0003674,GO:0003824,GO:0005575,GO:0005622,GO:0005623,GO:0005737,GO:0005739,GO:0005783,GO:0005829,GO:0005886,GO:0006082,GO:0006091,GO:0006099,GO:0006101,GO:0006106,GO:0006139,GO:0006457,GO:0006725,GO:0006732,GO:0006753,GO:0006793,GO:0006796,GO:0006807,GO:0006950,GO:0008150,GO:0008152,GO:0009060,GO:0009117,GO:0009628,GO:0009987,GO:0012505,GO:0015980,GO:0016020,GO:0016156,GO:0016491,GO:0016627,GO:…	ko:K18561
EXM03487.1	Thioredoxin		1	SP	0	0	FALSE	FALSE	SP	Endoplasmic_reticulum	cyto	Membrane bound Mitochondrial			Non-effector	0	reduced_virulence__unaffected_pathogenicity		O	GO:0000322,GO:0000323,GO:0000324,GO:0003674,GO:0003756,GO:0003824,GO:0005488,GO:0005515,GO:0005575,GO:0005622,GO:0005623,GO:0005737,GO:0005773,GO:0005783,GO:0005788,GO:0006457,GO:0006950,GO:0008150,GO:0008152,GO:0009987,GO:0012505,GO:0015035,GO:0015036,GO:0016491,GO:0016667,GO:0016671,GO:0016853,GO:0016860,GO:0016864,GO:0019153,GO:0031974,GO:0033554,GO:0034975,GO:0034976,GO:0043226,GO:0043227,GO:…	ko:K09584
EXM03525.1	Flavin containing amine oxidoreductase		0	SP	0	0	FALSE	FALSE	SP	Endoplasmic_reticulum	nucl	Membrane bound Golgi			Non-effector	0	reduced_virulence		E	-	-
EXM03558.1	fad binding domain-containing protein		0	NO_SP	0	0	FALSE	FALSE	noTP	Cytoplasm	cyto	Membrane bound Mitochondrial			Non-effector	0	unaffected_pathogenicity		C	-	-
EXM03559.1	-		0	NO_SP	0	0	FALSE	FALSE	noTP	Nucleus	cyto	Membrane bound Extracellular (Secreted)			Non-effector	0			-	-	-
EXM03599.1	manganese ion binding		0	NO_SP	0	0	FALSE	FALSE	mTP	Mitochondrion	mito	Mitochondrial			Non-effector	0			E	GO:0003674,GO:0003824,GO:0005575,GO:0005622,GO:0005623,GO:0005737,GO:0006508,GO:0006807,GO:0008150,GO:0008152,GO:0008233,GO:0008238,GO:0016787,GO:0016805,GO:0019538,GO:0043170,GO:0044238,GO:0044424,GO:0044464,GO:0070011,GO:0071704,GO:0140096,GO:1901564	ko:K14213
EXM03607.1	Belongs to the protein kinase superfamily. RIO-type Ser Thr kinase family		0	NO_SP	0	0	FALSE	FALSE	noTP	Nucleus	nucl	Nuclear			Cytoplasmic effector	0	lethal		DT	GO:0000228,GO:0000462,GO:0000785,GO:0000790,GO:0003674,GO:0003824,GO:0004672,GO:0005575,GO:0005622,GO:0005623,GO:0005634,GO:0005694,GO:0005730,GO:0005737,GO:0006139,GO:0006364,GO:0006396,GO:0006464,GO:0006468,GO:0006725,GO:0006793,GO:0006796,GO:0006807,GO:0007088,GO:0007096,GO:0007346,GO:0008150,GO:0008152,GO:0009893,GO:0009987,GO:0010467,GO:0010468,GO:0010564,GO:0010604,GO:0010628,GO:0016070,GO:…	ko:K07178
EXM03640.1	Belongs to the peptidase M28 family		0	SP	0	0	FALSE	FALSE	SP	Extracellular	cyto	Membrane bound Endoplasmic reticulum	Classical_secreted		Non-effector	0	reduced_virulence		O	GO:0000322,GO:0000323,GO:0000324,GO:0003674,GO:0003824,GO:0004177,GO:0005575,GO:0005622,GO:0005623,GO:0005737,GO:0005773,GO:0006508,GO:0006807,GO:0007039,GO:0008150,GO:0008152,GO:0008233,GO:0008238,GO:0009056,GO:0009057,GO:0009987,GO:0016787,GO:0019538,GO:0030163,GO:0043170,GO:0043226,GO:0043227,GO:0043229,GO:0043231,GO:0044237,GO:0044238,GO:0044248,GO:0044257,GO:0044260,GO:0044265,GO:0044267,GO:…	ko:K01264
EXM03661.1	Belongs to the cysteine synthase cystathionine beta- synthase family		0	NO_SP	0	0	FALSE	FALSE	noTP	Peroxisome	cyto	Membrane bound Mitochondrial			Non-effector	0	unaffected_pathogenicity__reduced_virulence		E	GO:0000096,GO:0000097,GO:0003674,GO:0003676,GO:0003723,GO:0003729,GO:0003824,GO:0004122,GO:0005488,GO:0005575,GO:0005622,GO:0005623,GO:0005737,GO:0005739,GO:0006082,GO:0006520,GO:0006534,GO:0006535,GO:0006563,GO:0006790,GO:0006807,GO:0007089,GO:0007346,GO:0008144,GO:0008150,GO:0008152,GO:0008652,GO:0009058,GO:0009069,GO:0009070,GO:0009092,GO:0009403,GO:0009404,GO:0009987,GO:0010494,GO:0010564,GO:…	ko:K01697
EXM03663.1	Belongs to the peptidase M28 family		0	SP	0	0	FALSE	TRUE	SP	Extracellular	cyto	Membrane bound Mitochondrial	Classical_membrane		Non-effector	0	reduced_virulence		O	-	-
EXM03676.1	Occurs in almost all aerobically respiring organisms and serves to protect cells from the toxic effects of hydrogen peroxide	Y	0	NO_SP	0	0	FALSE	FALSE	noTP	Cytoplasm	cyto	Cytoplasmic			Non-effector	0	increased_virulence_(hypervirulence)		Q	GO:0000003,GO:0000302,GO:0003674,GO:0003824,GO:0004096,GO:0004601,GO:0005488,GO:0005575,GO:0005618,GO:0005619,GO:0005622,GO:0005623,GO:0005737,GO:0005829,GO:0006873,GO:0006875,GO:0006879,GO:0006950,GO:0006979,GO:0007154,GO:0008150,GO:0008152,GO:0009056,GO:0009266,GO:0009267,GO:0009277,GO:0009408,GO:0009605,GO:0009628,GO:0009636,GO:0009987,GO:0009991,GO:0010035,GO:0010106,GO:0016209,GO:0016491,GO:…	ko:K03781
EXM03744.1	Four repeated domains in the Fasciclin I family of proteins, present in many other contexts.	Y	0	NO_SP	0	3	FALSE	TRUE	noTP	Cell_membrane	plas	Plasma membrane	Classical_membrane		Non-effector	0	reduced_virulence		M	-	-
EXM03789.1	-	Y	0	NO_SP	0	0	FALSE	FALSE	noTP	Cytoplasm	cyto	Cytoplasmic			Cytoplasmic effector	0			-	-	-
EXM03816.1	Belongs to the DEAD box helicase family	Y	0	NO_SP	0	0	FALSE	FALSE	noTP	Nucleus	nucl	Nuclear			Non-effector	0	reduced_virulence		A	GO:0000027,GO:0000166,GO:0003674,GO:0003676,GO:0003723,GO:0003724,GO:0003824,GO:0004004,GO:0004386,GO:0005488,GO:0005524,GO:0005575,GO:0005622,GO:0005623,GO:0005634,GO:0005730,GO:0005737,GO:0006139,GO:0006364,GO:0006396,GO:0006725,GO:0006807,GO:0006996,GO:0008026,GO:0008144,GO:0008150,GO:0008152,GO:0008186,GO:0009987,GO:0010467,GO:0010501,GO:0016043,GO:0016070,GO:0016072,GO:0016462,GO:0016787,GO:…	ko:K13181
EXM03817.1	-		0	SP	0	0	FALSE	TRUE	SP	Extracellular	extr	Membrane bound Extracellular (Secreted)	Classical_membrane		Apoplastic/cytoplasmic effector	0			-	-	-
EXM03850.1	SMP-30/Gluconolaconase/LRE-like region	Y	0	NO_SP	0	0	FALSE	FALSE	noTP	Cytoplasm	cyto	Cytoplasmic			Non-effector	0			PT	GO:0001558,GO:0003674,GO:0003824,GO:0004341,GO:0005488,GO:0005509,GO:0005575,GO:0005576,GO:0005975,GO:0005996,GO:0006082,GO:0006732,GO:0006766,GO:0006767,GO:0008150,GO:0008152,GO:0009058,GO:0009108,GO:0009110,GO:0009987,GO:0016051,GO:0016053,GO:0016787,GO:0016788,GO:0019752,GO:0019852,GO:0019853,GO:0030308,GO:0040008,GO:0042364,GO:0043167,GO:0043169,GO:0043436,GO:0044237,GO:0044238,GO:0044249,GO:…	-
EXM03860.1	Belongs to the peptidase M18 family		0	NO_SP	0	0	FALSE	FALSE	mTP	Mitochondrion	mito	Membrane bound Mitochondrial			Non-effector	0	reduced_virulence		E	GO:0000322,GO:0000323,GO:0000324,GO:0000328,GO:0003674,GO:0003824,GO:0004177,GO:0005575,GO:0005576,GO:0005622,GO:0005623,GO:0005737,GO:0005773,GO:0005775,GO:0006457,GO:0006508,GO:0006518,GO:0006807,GO:0008150,GO:0008152,GO:0008233,GO:0008235,GO:0008237,GO:0008238,GO:0009987,GO:0016787,GO:0019538,GO:0031974,GO:0034641,GO:0043170,GO:0043226,GO:0043227,GO:0043229,GO:0043231,GO:0043233,GO:0043603,GO:…	ko:K01267
EXM03878.1	Stm1		0	NO_SP	0	0	FALSE	FALSE	noTP	Nucleus	cyto	Nuclear			Cytoplasmic/apoplastic effector	0	effector_(plant_avirulence_determinant)		S	GO:0000723,GO:0003674,GO:0003676,GO:0003677,GO:0005488,GO:0005575,GO:0005622,GO:0005623,GO:0005737,GO:0005844,GO:0006139,GO:0006259,GO:0006412,GO:0006414,GO:0006417,GO:0006446,GO:0006518,GO:0006725,GO:0006807,GO:0006950,GO:0006996,GO:0007154,GO:0007165,GO:0008150,GO:0008152,GO:0009058,GO:0009059,GO:0009889,GO:0009987,GO:0010467,GO:0010468,GO:0010556,GO:0010608,GO:0010941,GO:0016043,GO:0019222,GO:…	ko:K13199
EXM03896.1	-	Y	0	SP	0	0	FALSE	TRUE	SP	Cell_membrane	extr	Extracellular (Secreted)	Classical_membrane		Apoplastic effector	0			-	-	-
EXM03969.1	Triosephosphate isomerase		0	NO_SP	0	0	FALSE	FALSE	noTP	Cytoplasm	cyto	Cytoplasmic			Cytoplasmic effector	0			G	GO:0001968,GO:0003674,GO:0003824,GO:0004807,GO:0005488,GO:0005515,GO:0005575,GO:0005576,GO:0005618,GO:0005622,GO:0005623,GO:0005737,GO:0005739,GO:0005829,GO:0005886,GO:0005975,GO:0005996,GO:0006006,GO:0006007,GO:0006066,GO:0006071,GO:0006081,GO:0006082,GO:0006090,GO:0006091,GO:0006094,GO:0006096,GO:0006139,GO:0006163,GO:0006164,GO:0006165,GO:0006725,GO:0006732,GO:0006733,GO:0006734,GO:0006735,GO:…	ko:K01803
EXM03974.1	Nuclear transport factor 2 (NTF2) domain	Y	0	NO_SP	0	0	FALSE	FALSE	noTP	Cytoplasm	nucl	Nuclear			Non-effector	0			A	GO:0000932,GO:0003674,GO:0003676,GO:0003723,GO:0003729,GO:0005488,GO:0005575,GO:0005622,GO:0005623,GO:0005737,GO:0005829,GO:0006464,GO:0006508,GO:0006807,GO:0006914,GO:0008150,GO:0008152,GO:0009056,GO:0009987,GO:0010494,GO:0016236,GO:0016579,GO:0019538,GO:0032386,GO:0032879,GO:0032991,GO:0034517,GO:0035770,GO:0035973,GO:0036211,GO:0036464,GO:0043021,GO:0043170,GO:0043226,GO:0043228,GO:0043229,GO:…	ko:K19718
EXM03997.1	4-nitrophenylphosphatase		0	NO_SP	0	0	FALSE	FALSE	noTP	Cytoplasm	cyto	Cytoplasmic			Non-effector	0	reduced_virulence		P	GO:0003674,GO:0003824,GO:0004035,GO:0004721,GO:0005575,GO:0005622,GO:0005623,GO:0005634,GO:0005737,GO:0005829,GO:0005975,GO:0006464,GO:0006470,GO:0006725,GO:0006793,GO:0006796,GO:0006805,GO:0006807,GO:0008150,GO:0008152,GO:0008967,GO:0009056,GO:0009410,GO:0009636,GO:0009987,GO:0016311,GO:0016787,GO:0016788,GO:0016791,GO:0018958,GO:0018960,GO:0019336,GO:0019439,GO:0019538,GO:0036211,GO:0042178,GO:…	ko:K01101
EXM04053.1	Serine threonine-protein phosphatase		0	NO_SP	0	0	FALSE	FALSE	noTP	Cytoplasm	nucl	Cytoplasmic			Cytoplasmic effector	0	lethal		T	GO:0000003,GO:0000022,GO:0000070,GO:0000075,GO:0000076,GO:0000077,GO:0000122,GO:0000164,GO:0000226,GO:0000228,GO:0000278,GO:0000280,GO:0000775,GO:0000776,GO:0000777,GO:0000778,GO:0000779,GO:0000780,GO:0000785,GO:0000790,GO:0000793,GO:0000794,GO:0000819,GO:0000903,GO:0000910,GO:0001400,GO:0003006,GO:0003674,GO:0003824,GO:0004721,GO:0004722,GO:0005575,GO:0005622,GO:0005623,GO:0005634,GO:0005654,GO:…	ko:K06269
EXM04057.1	RNA-binding component of the eukaryotic translation initiation factor 3 (eIF-3) complex, which is involved in protein synthesis of a specialized repertoire of mRNAs and, together with other initiation factors, stimulates binding of mRNA and methionyl-tRNAi to the 40S ribosome. The eIF-3 complex specifically targets and initiates translation of a subset of mRNAs involved in cell proliferation		0	NO_SP	0	0	FALSE	FALSE	noTP	Cytoplasm	cyto_nucl	Cytoplasmic			Non-effector	0			J	GO:0000131,GO:0001732,GO:0002181,GO:0002183,GO:0002188,GO:0003674,GO:0003676,GO:0003723,GO:0003729,GO:0003743,GO:0005488,GO:0005575,GO:0005622,GO:0005623,GO:0005737,GO:0005852,GO:0006412,GO:0006413,GO:0006518,GO:0006807,GO:0008135,GO:0008150,GO:0008152,GO:0009058,GO:0009059,GO:0009987,GO:0010467,GO:0010494,GO:0016043,GO:0016282,GO:0019538,GO:0022607,GO:0022613,GO:0022618,GO:0032991,GO:0034622,GO:…	ko:K03254
EXM04142.1	Proteasome		0	NO_SP	0	0	FALSE	FALSE	noTP	Cytoplasm	mito	Cytoplasmic			Cytoplasmic effector	0			O	GO:0000502,GO:0005575,GO:0005622,GO:0005623,GO:0005634,GO:0005737,GO:0005739,GO:0005829,GO:0005839,GO:0006508,GO:0006511,GO:0006807,GO:0007088,GO:0007346,GO:0008150,GO:0008152,GO:0009056,GO:0009057,GO:0009896,GO:0009987,GO:0010498,GO:0010499,GO:0010564,GO:0010638,GO:0010965,GO:0012505,GO:0016020,GO:0019538,GO:0019773,GO:0019941,GO:0030071,GO:0030163,GO:0031331,GO:0031597,GO:0031974,GO:0031981,GO:…	ko:K02731
EXM04156.1	Belongs to the eukaryotic ribosomal protein eS12 family		0	NO_SP	0	0	FALSE	FALSE	noTP	Cytoplasm	nucl	Cytoplasmic			Cytoplasmic effector	0			J	GO:0002181,GO:0003674,GO:0003735,GO:0005198,GO:0005575,GO:0005622,GO:0005623,GO:0005737,GO:0005829,GO:0005840,GO:0006412,GO:0006518,GO:0006807,GO:0008150,GO:0008152,GO:0009058,GO:0009059,GO:0009987,GO:0010467,GO:0015935,GO:0019538,GO:0022626,GO:0022627,GO:0032991,GO:0034641,GO:0034645,GO:0043043,GO:0043170,GO:0043226,GO:0043228,GO:0043229,GO:0043232,GO:0043603,GO:0043604,GO:0044237,GO:0044238,GO:…	ko:K02951
EXM04237.1	PLC-like phosphodiesterase		0	SP	0	0	FALSE	TRUE	SP	Cell_membrane	extr	Extracellular (Secreted)	Classical_membrane		Non-effector	0			S	-	-
EXM04313.1	c6 transcription factor		0	SP	0	1	FALSE	TRUE	SP	Cell_membrane	plas	Plasma membrane	Classical_membrane		Non-effector	0			S	-	-
EXM04331.1	Belongs to the FPP GGPP synthase family		0	NO_SP	0	0	FALSE	FALSE	noTP	Cytoplasm	cyto_nucl	Cytoplasmic			Cytoplasmic effector	0			H	GO:0003674,GO:0003824,GO:0004161,GO:0004337,GO:0004659,GO:0005575,GO:0005622,GO:0005623,GO:0005737,GO:0006629,GO:0006644,GO:0006720,GO:0006721,GO:0006793,GO:0006796,GO:0008150,GO:0008152,GO:0008299,GO:0008610,GO:0008654,GO:0009058,GO:0009987,GO:0016114,GO:0016740,GO:0016765,GO:0019637,GO:0044237,GO:0044238,GO:0044249,GO:0044255,GO:0044424,GO:0044464,GO:0045337,GO:0045338,GO:0071704,GO:0090407,GO:…	ko:K00787
EXM04366.1	Belongs to the DEAD box helicase family		0	NO_SP	0	0	FALSE	FALSE	noTP	Cytoplasm	nucl	Cytoplasmic			Non-effector	0	unaffected_pathogenicity		A	GO:0000375,GO:0000377,GO:0000390,GO:0000398,GO:0002181,GO:0002183,GO:0003674,GO:0003676,GO:0003723,GO:0003724,GO:0003725,GO:0003727,GO:0003729,GO:0003743,GO:0003824,GO:0004004,GO:0004386,GO:0005488,GO:0005575,GO:0005622,GO:0005623,GO:0005634,GO:0005730,GO:0005737,GO:0006139,GO:0006396,GO:0006397,GO:0006412,GO:0006413,GO:0006518,GO:0006725,GO:0006807,GO:0008026,GO:0008135,GO:0008150,GO:0008152,GO:…	ko:K11594
EXM04519.1	PIN domain of ribonuclease		0	NO_SP	0	0	FALSE	FALSE	noTP	Nucleus	cyto	Nuclear			Cytoplasmic effector	0	lethal		O	GO:0000462,GO:0000469,GO:0000478,GO:0003674,GO:0003676,GO:0003723,GO:0003824,GO:0004518,GO:0004519,GO:0004521,GO:0004540,GO:0005488,GO:0005575,GO:0005622,GO:0005623,GO:0005634,GO:0005730,GO:0005737,GO:0006139,GO:0006364,GO:0006396,GO:0006725,GO:0006807,GO:0008150,GO:0008152,GO:0009987,GO:0010467,GO:0016043,GO:0016070,GO:0016072,GO:0016787,GO:0016788,GO:0019843,GO:0022607,GO:0022613,GO:0030490,GO:…	ko:K11883
EXM04527.1	short chain dehydrogenase	Y	0	NO_SP	0	0	FALSE	FALSE	mTP	Mitochondrion	mito	Mitochondrial			Non-effector	0			Q	GO:0003674,GO:0003824,GO:0008150,GO:0008152,GO:0016491,GO:0055114	-
EXM04556.1	NUDIX domain		0	NO_SP	0	0	FALSE	FALSE	mTP	Mitochondrion	mito	Membrane bound Mitochondrial			Non-effector	0			L	-	ko:K01515
EXM04575.1	ThiJ/PfpI family-like		0	NO_SP	0	0	FALSE	FALSE	noTP	Cytoplasm	cyto	Cytoplasmic			Non-effector	0	loss_of_pathogenicity		S	-	-
EXM04590.1	Formyltetrahydrofolate deformylase		0	NO_SP	0	0	FALSE	FALSE	noTP	Cytoplasm	cysk	Peroxisomal			Non-effector	0	unaffected_pathogenicity__reduced_virulence		G	-	ko:K01433
EXM04674.1	Flavin containing amine oxidoreductase	Y	0	NO_SP	0	1	FALSE	FALSE	noTP	Cytoplasm	cyto	Plasma membrane			Non-effector	0			E	-	-
EXM04676.1	Belongs to the peptidase M28 family		0	SP	0	0	FALSE	FALSE	SP	Extracellular	cyto	Cytoplasmic	Classical_secreted		Non-effector	0	reduced_virulence		OP	-	ko:K01302
EXM04775.1	Glutamine amidotransferase class-I	Y	0	NO_SP	0	0	FALSE	FALSE	noTP	Cytoplasm	cysk	Cytoplasmic			Non-effector	0			F	GO:0003674,GO:0003824,GO:0005575,GO:0005622,GO:0005623,GO:0005634,GO:0005737,GO:0006873,GO:0006875,GO:0006878,GO:0006879,GO:0008150,GO:0009987,GO:0016787,GO:0016810,GO:0016811,GO:0019725,GO:0030003,GO:0031974,GO:0031981,GO:0034399,GO:0042592,GO:0043226,GO:0043227,GO:0043229,GO:0043231,GO:0043233,GO:0044422,GO:0044424,GO:0044428,GO:0044446,GO:0044464,GO:0046916,GO:0048878,GO:0050801,GO:0055065,GO:…	ko:K01951,ko:K22314
EXM04782.1	to quinone oxidoreductase		0	NO_SP	0	0	FALSE	FALSE	mTP	Mitochondrion	mito	Membrane bound Mitochondrial			Non-effector	0	unaffected_pathogenicity		C	-	ko:K00344
EXM04827.1	to deacetylase		0	SP	0	0	FALSE	FALSE	SP	Extracellular	extr	Extracellular (Secreted)	Classical_secreted	CE4	Non-effector	0	unaffected_pathogenicity		O	-	ko:K22278
EXM04886.1	-	Y	0	SP	0	0	FALSE	TRUE	SP	Cell_membrane	extr	Membrane bound Extracellular (Secreted)	Classical_membrane		Non-effector	0			-	-	-
EXM04896.1	Proteasome		0	NO_SP	0	0	FALSE	FALSE	noTP	Cytoplasm	cyto	Cytoplasmic			Apoplastic effector	0			O	GO:0000502,GO:0003674,GO:0003824,GO:0004175,GO:0005575,GO:0005622,GO:0005623,GO:0005634,GO:0005737,GO:0005783,GO:0005789,GO:0005829,GO:0005839,GO:0006508,GO:0006511,GO:0006807,GO:0007088,GO:0007346,GO:0008150,GO:0008152,GO:0008233,GO:0009056,GO:0009057,GO:0009896,GO:0009987,GO:0010498,GO:0010499,GO:0010564,GO:0010638,GO:0010965,GO:0012505,GO:0016020,GO:0016787,GO:0019538,GO:0019774,GO:0019941,GO:…	ko:K02738
EXM04922.1	adenosylhomocysteinase		0	NO_SP	0	0	FALSE	FALSE	noTP	Cytoplasm	cyto	Cytoplasmic			Non-effector	0	unaffected_pathogenicity__reduced_virulence		H	GO:0000096,GO:0003674,GO:0003824,GO:0004013,GO:0005575,GO:0005576,GO:0005622,GO:0005623,GO:0005737,GO:0005829,GO:0006082,GO:0006139,GO:0006152,GO:0006520,GO:0006534,GO:0006555,GO:0006575,GO:0006629,GO:0006638,GO:0006639,GO:0006641,GO:0006644,GO:0006650,GO:0006656,GO:0006725,GO:0006732,GO:0006790,GO:0006793,GO:0006796,GO:0006807,GO:0008150,GO:0008152,GO:0008610,GO:0008654,GO:0009056,GO:0009058,GO:…	ko:K01251
EXM04923.1	component of the eukaryotic translation initiation factor 3 (eIF-3) complex, which is involved in protein synthesis of a specialized repertoire of mRNAs and, together with other initiation factors, stimulates binding of mRNA and methionyl-tRNAi to the 40S ribosome. The eIF-3 complex specifically targets and initiates translation of a subset of mRNAs involved in cell proliferation		0	NO_SP	0	0	FALSE	FALSE	noTP	Plastid	nucl	Nuclear			Non-effector	0			J	GO:0002181,GO:0002183,GO:0003674,GO:0003824,GO:0004843,GO:0005575,GO:0005622,GO:0005623,GO:0005634,GO:0005737,GO:0005852,GO:0006412,GO:0006413,GO:0006464,GO:0006508,GO:0006518,GO:0006807,GO:0008150,GO:0008152,GO:0008180,GO:0008233,GO:0008234,GO:0009058,GO:0009059,GO:0009987,GO:0010467,GO:0016282,GO:0016787,GO:0019538,GO:0019783,GO:0032991,GO:0034641,GO:0034645,GO:0036211,GO:0036459,GO:0043043,GO:…	ko:K03247
EXM04933.1	Belongs to the eukaryotic ribosomal protein P1 P2 family		0	NO_SP	0	0	FALSE	FALSE	noTP	Cytoplasm	cyto	Nuclear			Cytoplasmic effector	0			J	GO:0000322,GO:0000323,GO:0000324,GO:0001932,GO:0001934,GO:0002181,GO:0002182,GO:0003674,GO:0003735,GO:0005198,GO:0005575,GO:0005622,GO:0005623,GO:0005737,GO:0005773,GO:0005829,GO:0005840,GO:0006412,GO:0006414,GO:0006518,GO:0006807,GO:0008047,GO:0008150,GO:0008152,GO:0009058,GO:0009059,GO:0009893,GO:0009987,GO:0010467,GO:0010562,GO:0010604,GO:0015934,GO:0019207,GO:0019209,GO:0019220,GO:0019222,GO:…	ko:K02943
EXM04935.1	Nuclear fragile X mental retardation-interacting protein 1 (NUFIP1)	Y	0	NO_SP	0	0	FALSE	FALSE	noTP	Nucleus	nucl	Extracellular (Secreted)			Cytoplasmic effector	0			S	-	-
EXM05002.1	Protein of unknown function (DUF1749)		0	NO_SP	0	0	FALSE	FALSE	noTP	Cytoplasm	cyto	Cytoplasmic			Non-effector	0			S	-	-
EXM05066.1	Belongs to the class-III pyridoxal-phosphate-dependent aminotransferase family		0	NO_SP	0	0	FALSE	FALSE	noTP	Cytoplasm	cyto	Cytoplasmic			Non-effector	0	loss_of_pathogenicity__reduced_virulence__unaffected_pathogenicity		E	GO:0003674,GO:0003824,GO:0004587,GO:0005488,GO:0005515,GO:0005575,GO:0005622,GO:0005623,GO:0005634,GO:0005737,GO:0005829,GO:0006082,GO:0006520,GO:0006525,GO:0006527,GO:0006560,GO:0006591,GO:0006807,GO:0008144,GO:0008150,GO:0008152,GO:0008483,GO:0009056,GO:0009063,GO:0009064,GO:0009065,GO:0009987,GO:0010121,GO:0016054,GO:0016740,GO:0016769,GO:0019493,GO:0019752,GO:0019842,GO:0030170,GO:0036094,GO:…	ko:K00819
EXM05095.1	Belongs to the AAA ATPase family		0	NO_SP	0	0	FALSE	FALSE	noTP	Cytoplasm	nucl	Nuclear			Non-effector	0	loss_of_pathogenicity		O	GO:0000070,GO:0000151,GO:0000153,GO:0000226,GO:0000228,GO:0000278,GO:0000280,GO:0000785,GO:0000790,GO:0000819,GO:0000835,GO:0000836,GO:0000837,GO:0000839,GO:0003674,GO:0003824,GO:0005488,GO:0005515,GO:0005575,GO:0005622,GO:0005623,GO:0005634,GO:0005694,GO:0005737,GO:0005739,GO:0005740,GO:0005741,GO:0005783,GO:0005789,GO:0005819,GO:0005829,GO:0005856,GO:0005937,GO:0006139,GO:0006355,GO:0006357,GO:…	ko:K13525
EXM05174.1	Core component of nucleosome. Nucleosomes wrap and compact DNA into chromatin, limiting DNA accessibility to the cellular machineries which require DNA as a template. Histones thereby play a central role in transcription regulation, DNA repair, DNA replication and chromosomal stability. DNA accessibility is regulated via a complex set of post-translational modifications of histones, also called h…		0	NO_SP	0	0	FALSE	FALSE	noTP	Nucleus	nucl	Cytoplasmic			Cytoplasmic effector	0			B	GO:0000003,GO:0000122,GO:0000228,GO:0000785,GO:0000786,GO:0000788,GO:0000790,GO:0003006,GO:0003674,GO:0003676,GO:0003677,GO:0005488,GO:0005515,GO:0005575,GO:0005622,GO:0005623,GO:0005634,GO:0005657,GO:0005694,GO:0006323,GO:0006325,GO:0006333,GO:0006334,GO:0006342,GO:0006355,GO:0006357,GO:0006464,GO:0006479,GO:0006807,GO:0006996,GO:0007049,GO:0008150,GO:0008152,GO:0008213,GO:0009653,GO:0009889,GO:…	ko:K11254
EXM05194.1	Belongs to the ClpA ClpB family		0	NO_SP	0	0	FALSE	FALSE	noTP	Cytoplasm	cyto	Nuclear			Non-effector	0	unaffected_pathogenicity		O	GO:0000166,GO:0000302,GO:0001302,GO:0001306,GO:0001315,GO:0001316,GO:0001317,GO:0001319,GO:0001321,GO:0001322,GO:0003674,GO:0003824,GO:0005488,GO:0005515,GO:0005524,GO:0005575,GO:0005622,GO:0005623,GO:0005634,GO:0005737,GO:0005829,GO:0005975,GO:0005984,GO:0005991,GO:0006457,GO:0006458,GO:0006950,GO:0006979,GO:0006996,GO:0007568,GO:0007569,GO:0007571,GO:0008104,GO:0008144,GO:0008150,GO:0008152,GO:…	ko:K03695
EXM05250.1	The pyruvate dehydrogenase complex catalyzes the overall conversion of pyruvate to acetyl-CoA and CO(2)		0	NO_SP	0	0	FALSE	FALSE	mTP	Mitochondrion	mito	Membrane bound Mitochondrial			Non-effector	0	reduced_virulence		C	GO:0003674,GO:0003824,GO:0004738,GO:0004739,GO:0005575,GO:0005622,GO:0005623,GO:0005634,GO:0005730,GO:0005737,GO:0005739,GO:0005759,GO:0005967,GO:0006082,GO:0006084,GO:0006085,GO:0006086,GO:0006090,GO:0006091,GO:0006099,GO:0006101,GO:0006139,GO:0006163,GO:0006164,GO:0006637,GO:0006725,GO:0006732,GO:0006753,GO:0006790,GO:0006793,GO:0006796,GO:0006807,GO:0007124,GO:0008150,GO:0008152,GO:0009058,GO:…	ko:K00161
EXM05287.1	Belongs to the universal ribosomal protein uS3 family		0	NO_SP	0	0	FALSE	FALSE	noTP	Cytoplasm	mito	Mitochondrial			Non-effector	0			J	GO:0000054,GO:0000056,GO:0000702,GO:0002181,GO:0003674,GO:0003676,GO:0003677,GO:0003684,GO:0003735,GO:0003824,GO:0003906,GO:0005198,GO:0005488,GO:0005575,GO:0005622,GO:0005623,GO:0005634,GO:0005737,GO:0005829,GO:0005840,GO:0006139,GO:0006259,GO:0006281,GO:0006403,GO:0006405,GO:0006407,GO:0006412,GO:0006518,GO:0006611,GO:0006725,GO:0006807,GO:0006810,GO:0006886,GO:0006913,GO:0006950,GO:0006974,GO:…	ko:K02985
EXM05358.1	FAD binding domain	Y	0	SP	0	0	FALSE	FALSE	SP	Extracellular	extr	Membrane bound Mitochondrial	Classical_secreted		Non-effector	0	reduced_virulence		C	-	-
EXM05362.1	Belongs to the phosphoglycerate kinase family		0	NO_SP	0	0	FALSE	FALSE	noTP	Mitochondrion	mito	Membrane bound Mitochondrial			Non-effector	0			G	GO:0000166,GO:0003674,GO:0003824,GO:0004618,GO:0005488,GO:0005524,GO:0005575,GO:0005622,GO:0005623,GO:0005737,GO:0005739,GO:0005829,GO:0005886,GO:0005975,GO:0005996,GO:0006006,GO:0006007,GO:0006082,GO:0006090,GO:0006091,GO:0006094,GO:0006096,GO:0006139,GO:0006163,GO:0006164,GO:0006165,GO:0006725,GO:0006732,GO:0006733,GO:0006734,GO:0006735,GO:0006753,GO:0006754,GO:0006757,GO:0006793,GO:0006796,GO:…	ko:K00927
EXM05377.1	Protein of unknown function (DUF1349)	Y	0	NO_SP	0	0	FALSE	FALSE	noTP	Plastid	cyto	Cytoplasmic			Cytoplasmic effector	0			S	-	ko:K09702
EXM05403.1	NADH:flavin oxidoreductase / NADH oxidase family	Y	0	NO_SP	0	0	FALSE	FALSE	noTP	Cytoplasm	cyto	Cytoplasmic			Non-effector	0	reduced_virulence		C	-	-
EXM05429.1	Belongs to the ubiquitin-conjugating enzyme family		0	NO_SP	0	0	FALSE	FALSE	noTP	Nucleus	cyto	Cytoplasmic			Non-effector	0	reduced_virulence		O	GO:0003674,GO:0003824,GO:0004842,GO:0006464,GO:0006508,GO:0006511,GO:0006807,GO:0008150,GO:0008152,GO:0009056,GO:0009057,GO:0009987,GO:0016567,GO:0016740,GO:0019538,GO:0019787,GO:0019941,GO:0030163,GO:0032446,GO:0036211,GO:0043170,GO:0043412,GO:0043632,GO:0044237,GO:0044238,GO:0044248,GO:0044257,GO:0044260,GO:0044265,GO:0044267,GO:0051603,GO:0061631,GO:0061650,GO:0070647,GO:0071704,GO:0140096,GO:…	ko:K13280
EXM05434.1	-		0	NO_SP	0	0	FALSE	FALSE	noTP	Nucleus	nucl	Nuclear			Cytoplasmic effector	0			-	-	-
EXM05536.1	Cutinase		0	SP	0	1	FALSE	TRUE	SP	Cell_membrane	extr	Extracellular (Secreted)	Classical_membrane	CE5	Non-effector	0			S	-	ko:K05972
EXM05567.1	Belongs to the peptidase S10 family		0	SP	0	0	FALSE	FALSE	SP	Extracellular	extr	Lysosomal	Classical_secreted		Non-effector	0	reduced_virulence		O	-	ko:K01288
EXM05629.1	Catalyzes the cleavage of L-kynurenine (L-Kyn) and L-3- hydroxykynurenine (L-3OHKyn) into anthranilic acid (AA) and 3- hydroxyanthranilic acid (3-OHAA), respectively	Y	0	NO_SP	0	0	FALSE	FALSE	noTP	Peroxisome	cyto	Cytoplasmic			Non-effector	0			E	GO:0003674,GO:0003824,GO:0005575,GO:0005622,GO:0005623,GO:0005634,GO:0005737,GO:0006082,GO:0006139,GO:0006520,GO:0006568,GO:0006569,GO:0006576,GO:0006586,GO:0006725,GO:0006732,GO:0006733,GO:0006753,GO:0006766,GO:0006767,GO:0006793,GO:0006796,GO:0006807,GO:0008150,GO:0008152,GO:0009056,GO:0009058,GO:0009063,GO:0009072,GO:0009074,GO:0009108,GO:0009117,GO:0009165,GO:0009308,GO:0009310,GO:0009435,GO:…	ko:K01556
EXM05647.1	60S ribosomal protein L32		0	NO_SP	0	0	FALSE	FALSE	noTP	Cytoplasm	mito	Cytoplasmic			Cytoplasmic effector	0			J	GO:0002181,GO:0003674,GO:0003735,GO:0005198,GO:0005575,GO:0005622,GO:0005623,GO:0005737,GO:0005829,GO:0005840,GO:0006412,GO:0006518,GO:0006807,GO:0008150,GO:0008152,GO:0009058,GO:0009059,GO:0009987,GO:0010467,GO:0015934,GO:0019538,GO:0022625,GO:0022626,GO:0032991,GO:0034641,GO:0034645,GO:0043043,GO:0043170,GO:0043226,GO:0043228,GO:0043229,GO:0043232,GO:0043603,GO:0043604,GO:0044237,GO:0044238,GO:…	ko:K02912
EXM05711.1	Elongation factor		0	NO_SP	0	0	FALSE	FALSE	noTP	Nucleus	cyto	Cytoplasmic			Non-effector	0	reduced_virulence		Q	GO:0000166,GO:0002181,GO:0002182,GO:0003674,GO:0003676,GO:0003723,GO:0003746,GO:0003824,GO:0003924,GO:0005488,GO:0005524,GO:0005575,GO:0005618,GO:0005622,GO:0005623,GO:0005737,GO:0005829,GO:0005840,GO:0005886,GO:0006412,GO:0006414,GO:0006415,GO:0006518,GO:0006807,GO:0008135,GO:0008144,GO:0008150,GO:0008152,GO:0009058,GO:0009059,GO:0009277,GO:0009986,GO:0009987,GO:0010467,GO:0010494,GO:0016020,GO:…	ko:K03235
EXM05781.1	Aldehyde reductase 1 (Alcohol dehydrogenase NADP		0	NO_SP	0	0	FALSE	FALSE	noTP	Cytoplasm	cyto	Cytoplasmic			Cytoplasmic effector	0	unaffected_pathogenicity		S	-	ko:K18107
EXM05795.1	UDP-glucose 6-dehydrogenase		0	NO_SP	0	0	FALSE	FALSE	noTP	Peroxisome	cyto	Cytoplasmic			Non-effector	0	loss_of_pathogenicity		GT	-	ko:K00012
EXM05802.1	Belongs to the 5'-nucleotidase family	Y	0	NO_SP	0	0	FALSE	FALSE	noTP	Cytoplasm	cyto	Cytoplasmic			Non-effector	0	reduced_virulence		F	-	-
EXM05887.1	The AROM polypeptide catalyzes 5 consecutive enzymatic reactions in prechorismate polyaromatic amino acid biosynthesis		0	NO_SP	1	0	FALSE	FALSE	noTP	Peroxisome	cysk	Nuclear			Non-effector	0	reduced_virulence		E	GO:0003674,GO:0003824,GO:0003855,GO:0003856,GO:0003866,GO:0004764,GO:0004765,GO:0005575,GO:0005622,GO:0005623,GO:0005737,GO:0006082,GO:0006793,GO:0006796,GO:0008150,GO:0008152,GO:0009058,GO:0009423,GO:0009987,GO:0016053,GO:0016301,GO:0016310,GO:0016491,GO:0016614,GO:0016616,GO:0016740,GO:0016765,GO:0016772,GO:0016773,GO:0016829,GO:0016835,GO:0016836,GO:0016838,GO:0019752,GO:0043436,GO:0043648,GO:…	ko:K13830
EXM06131.1	Bromodomain extra-terminal - transcription regulation	Y	0	NO_SP	0	0	FALSE	FALSE	noTP	Nucleus	nucl	Nuclear			Non-effector	0	reduced_virulence		K	GO:0000228,GO:0000785,GO:0000790,GO:0000812,GO:0001047,GO:0001067,GO:0001085,GO:0001091,GO:0001094,GO:0001098,GO:0001099,GO:0001672,GO:0003674,GO:0003676,GO:0003677,GO:0003682,GO:0005488,GO:0005515,GO:0005575,GO:0005622,GO:0005623,GO:0005634,GO:0005694,GO:0006139,GO:0006259,GO:0006281,GO:0006325,GO:0006338,GO:0006351,GO:0006355,GO:0006725,GO:0006807,GO:0006950,GO:0006974,GO:0006996,GO:0008134,GO:…	ko:K11684
EXM06149.1	Arginosuccinate synthase	Y	0	NO_SP	0	0	FALSE	FALSE	noTP	Cytoplasm	cyto	Cytoplasmic			Non-effector	0	loss_of_pathogenicity		E	-	ko:K01940
EXM06228.1	-	Y	0	NO_SP	0	0	FALSE	FALSE	noTP	Nucleus	nucl	Cytoplasmic			Non-effector	0			-	-	-
EXM06231.1	Belongs to the eukaryotic ribosomal protein eS24 family		0	NO_SP	0	0	FALSE	FALSE	noTP	Cytoplasm	mito	Nuclear			Cytoplasmic effector	0			J	GO:0000462,GO:0002181,GO:0002182,GO:0003674,GO:0003735,GO:0005198,GO:0005575,GO:0005622,GO:0005623,GO:0005737,GO:0005739,GO:0005829,GO:0005840,GO:0006139,GO:0006364,GO:0006396,GO:0006412,GO:0006414,GO:0006518,GO:0006725,GO:0006807,GO:0008150,GO:0008152,GO:0009058,GO:0009059,GO:0009987,GO:0010467,GO:0015935,GO:0016070,GO:0016072,GO:0019538,GO:0022613,GO:0022626,GO:0022627,GO:0030490,GO:0032991,GO:…	ko:K02974
EXM06237.1	mannose-6-phosphate isomerase		0	NO_SP	0	0	FALSE	FALSE	noTP	Cytoplasm	cyto	Cytoplasmic			Non-effector	0	reduced_virulence		G	GO:0000032,GO:0003674,GO:0003824,GO:0004476,GO:0005575,GO:0005622,GO:0005623,GO:0005634,GO:0005737,GO:0005975,GO:0005996,GO:0006013,GO:0006056,GO:0006057,GO:0006139,GO:0006464,GO:0006486,GO:0006725,GO:0006807,GO:0008150,GO:0008152,GO:0009058,GO:0009059,GO:0009100,GO:0009101,GO:0009225,GO:0009226,GO:0009298,GO:0009987,GO:0016043,GO:0016853,GO:0016860,GO:0016861,GO:0018130,GO:0019318,GO:0019438,GO:…	ko:K01809
EXM06261.1	Histone H2B		0	NO_SP	0	0	FALSE	FALSE	noTP	Nucleus	nucl	Nuclear			Cytoplasmic effector	0			B	GO:0000122,GO:0000228,GO:0000785,GO:0000786,GO:0000788,GO:0000790,GO:0003674,GO:0003676,GO:0003677,GO:0005488,GO:0005575,GO:0005622,GO:0005623,GO:0005634,GO:0005657,GO:0005694,GO:0006139,GO:0006259,GO:0006281,GO:0006301,GO:0006325,GO:0006333,GO:0006355,GO:0006357,GO:0006725,GO:0006807,GO:0006950,GO:0006974,GO:0006996,GO:0008150,GO:0008152,GO:0009889,GO:0009890,GO:0009892,GO:0009987,GO:0010468,GO:…	ko:K11252
EXM06297.1	Pyridine nucleotide-disulphide oxidoreductase, dimerisation domain		0	NO_SP	0	0	FALSE	FALSE	noTP	Peroxisome	cyto	Cytoplasmic			Non-effector	0	effector_(plant_avirulence_determinant)		C	GO:0000003,GO:0000070,GO:0000226,GO:0000278,GO:0000280,GO:0000819,GO:0001505,GO:0003674,GO:0003824,GO:0004148,GO:0004375,GO:0004591,GO:0004738,GO:0004739,GO:0005488,GO:0005515,GO:0005575,GO:0005622,GO:0005623,GO:0005737,GO:0005739,GO:0005759,GO:0005856,GO:0005874,GO:0005947,GO:0005960,GO:0005967,GO:0006082,GO:0006084,GO:0006085,GO:0006086,GO:0006090,GO:0006091,GO:0006103,GO:0006139,GO:0006163,GO:…	ko:K00382,ko:K17583
EXM06320.1	Belongs to the TPP enzyme family		0	NO_SP	0	0	FALSE	FALSE	noTP	Cytoplasm	cyto	Cytoplasmic			Non-effector	0	unaffected_pathogenicity		EH	GO:0000947,GO:0000949,GO:0000955,GO:0003674,GO:0003824,GO:0004737,GO:0005575,GO:0005622,GO:0005623,GO:0005975,GO:0005996,GO:0006006,GO:0006066,GO:0006067,GO:0006082,GO:0006090,GO:0006091,GO:0006113,GO:0006115,GO:0006139,GO:0006163,GO:0006520,GO:0006558,GO:0006559,GO:0006568,GO:0006569,GO:0006576,GO:0006586,GO:0006725,GO:0006732,GO:0006733,GO:0006753,GO:0006793,GO:0006796,GO:0006807,GO:0008150,GO:…	ko:K01568
EXM06441.1	D-xylulose 5-phosphate/D-fructose 6-phosphate phosphoketolase		0	NO_SP	0	0	FALSE	FALSE	noTP	Cytoplasm	cyto	Membrane bound Extracellular (Secreted)			Non-effector	0	unaffected_pathogenicity__reduced_virulence		G	-	ko:K01621
EXM06486.1	assists the folding of proteins upon ATP hydrolysis		0	NO_SP	0	0	FALSE	FALSE	noTP	Cytoplasm	cyto	Cytoplasmic			Non-effector	0	unaffected_pathogenicity		O	GO:0003674,GO:0005488,GO:0005515,GO:0005575,GO:0005622,GO:0005623,GO:0005737,GO:0005829,GO:0005832,GO:0005856,GO:0006457,GO:0006458,GO:0008150,GO:0009987,GO:0032991,GO:0043226,GO:0043228,GO:0043229,GO:0043232,GO:0044183,GO:0044424,GO:0044444,GO:0044445,GO:0044464,GO:0051082,GO:0061077,GO:0101031	ko:K09499
EXM06498.1	carbohydrate-binding module family 19 protein	Y	0	SP	0	0	FALSE	FALSE	SP	Extracellular	mito	Membrane bound Extracellular (Secreted)	Classical_secreted		Non-effector	0			S	-	-
EXM06507.1	Interconversion of serine and glycine		0	NO_SP	0	0	FALSE	FALSE	noTP	Cytoplasm	cyto	Cytoplasmic			Non-effector	0	reduced_virulence		H	GO:0001505,GO:0003674,GO:0003824,GO:0004372,GO:0005575,GO:0005622,GO:0005623,GO:0005737,GO:0005886,GO:0005937,GO:0006082,GO:0006520,GO:0006544,GO:0006563,GO:0006730,GO:0006807,GO:0008150,GO:0008152,GO:0009069,GO:0009987,GO:0016020,GO:0016740,GO:0016741,GO:0016742,GO:0017144,GO:0019752,GO:0030427,GO:0042133,GO:0042995,GO:0043332,GO:0043436,GO:0044237,GO:0044238,GO:0044281,GO:0044424,GO:0044463,GO:…	ko:K00600
EXM06512.1	Belongs to the universal ribosomal protein uL3 family	Y	0	NO_SP	0	0	FALSE	FALSE	noTP	Cytoplasm	cyto	Membrane bound Mitochondrial			Cytoplasmic effector	0			J	GO:0000027,GO:0002181,GO:0003674,GO:0003676,GO:0003723,GO:0003735,GO:0005198,GO:0005488,GO:0005575,GO:0005622,GO:0005623,GO:0005737,GO:0005829,GO:0005840,GO:0006139,GO:0006364,GO:0006396,GO:0006412,GO:0006518,GO:0006725,GO:0006807,GO:0006996,GO:0008150,GO:0008152,GO:0009058,GO:0009059,GO:0009987,GO:0010467,GO:0015934,GO:0016043,GO:0016070,GO:0016072,GO:0019538,GO:0022607,GO:0022613,GO:0022618,GO:…	ko:K02925
EXM06539.1	1,4-alpha-D-glucan glucohydrolase		0	NO_SP	0	1	FALSE	FALSE	noTP	Extracellular	extr	Membrane bound Extracellular (Secreted)	Classical_membrane	GH15|CBM20	Non-effector	0	unaffected_pathogenicity__loss_of_pathogenicity		G	GO:0000272,GO:0000322,GO:0000323,GO:0000324,GO:0003674,GO:0003824,GO:0004339,GO:0004553,GO:0005575,GO:0005622,GO:0005623,GO:0005737,GO:0005773,GO:0005783,GO:0005975,GO:0005976,GO:0005977,GO:0005980,GO:0006073,GO:0006091,GO:0006112,GO:0008150,GO:0008152,GO:0009056,GO:0009057,GO:0009251,GO:0009986,GO:0009987,GO:0012505,GO:0015926,GO:0015980,GO:0016052,GO:0016787,GO:0016798,GO:0043170,GO:0043226,GO:…	ko:K01178
EXM06552.1	Plectin/S10 domain		0	NO_SP	0	0	FALSE	FALSE	noTP	Nucleus	mito	Nuclear			Cytoplasmic effector	0			J	GO:0000028,GO:0002181,GO:0003674,GO:0003676,GO:0003723,GO:0003735,GO:0005198,GO:0005488,GO:0005575,GO:0005622,GO:0005623,GO:0005737,GO:0005829,GO:0005840,GO:0006403,GO:0006405,GO:0006407,GO:0006412,GO:0006518,GO:0006611,GO:0006807,GO:0006810,GO:0006886,GO:0006913,GO:0006996,GO:0008104,GO:0008150,GO:0008152,GO:0009058,GO:0009059,GO:0009987,GO:0010467,GO:0015031,GO:0015833,GO:0015931,GO:0015935,GO:…	ko:K02947
EXM06570.1	Glyceraldehyde-3-phosphate dehydrogenase		0	NO_SP	0	0	FALSE	FALSE	noTP	Cytoplasm	cyto	Cytoplasmic			Non-effector	0	reduced_virulence		G	GO:0001932,GO:0001934,GO:0003674,GO:0003676,GO:0003682,GO:0003723,GO:0003824,GO:0004365,GO:0005488,GO:0005575,GO:0005576,GO:0005618,GO:0005622,GO:0005623,GO:0005634,GO:0005737,GO:0005739,GO:0005811,GO:0005829,GO:0005886,GO:0005975,GO:0005996,GO:0006006,GO:0006007,GO:0006082,GO:0006090,GO:0006091,GO:0006094,GO:0006096,GO:0006139,GO:0006163,GO:0006164,GO:0006165,GO:0006725,GO:0006732,GO:0006733,GO:…	ko:K00134
EXM06587.1	Belongs to the chaperonin (HSP60) family		0	NO_SP	0	0	FALSE	FALSE	mTP	Mitochondrion	mito	Cytoplasmic			Non-effector	0	unaffected_pathogenicity		O	GO:0000166,GO:0003674,GO:0003676,GO:0003677,GO:0003688,GO:0003690,GO:0003697,GO:0003824,GO:0005488,GO:0005515,GO:0005524,GO:0005575,GO:0005622,GO:0005623,GO:0005634,GO:0005681,GO:0005737,GO:0005739,GO:0005740,GO:0005758,GO:0005759,GO:0005829,GO:0006457,GO:0006458,GO:0006605,GO:0006626,GO:0006807,GO:0006810,GO:0006839,GO:0006886,GO:0006915,GO:0006950,GO:0006970,GO:0006996,GO:0007005,GO:0008104,GO:…	ko:K04077
EXM06596.1	Aldo/keto reductase family		0	NO_SP	0	0	FALSE	FALSE	SP	Mitochondrion	cyto	Membrane bound Mitochondrial			Non-effector	0	unaffected_pathogenicity		S	GO:0003674,GO:0003824,GO:0004032,GO:0004033,GO:0005575,GO:0005622,GO:0005623,GO:0005634,GO:0005737,GO:0005886,GO:0006725,GO:0006807,GO:0006950,GO:0006979,GO:0008106,GO:0008150,GO:0008152,GO:0009987,GO:0016020,GO:0016491,GO:0016614,GO:0016616,GO:0016651,GO:0016652,GO:0016903,GO:0033554,GO:0034599,GO:0034641,GO:0042180,GO:0042221,GO:0043226,GO:0043227,GO:0043229,GO:0043231,GO:0043603,GO:0044237,GO:…	ko:K19654
EXM06598.1	Belongs to the complex I 75 kDa subunit family		0	NO_SP	0	0	FALSE	FALSE	mTP	Mitochondrion	mito	Mitochondrial			Non-effector	0			C	GO:0003674,GO:0003824,GO:0003954,GO:0005488,GO:0005575,GO:0005622,GO:0005623,GO:0005737,GO:0005739,GO:0005740,GO:0005743,GO:0005746,GO:0005747,GO:0006091,GO:0008137,GO:0008150,GO:0008152,GO:0009987,GO:0015980,GO:0016020,GO:0016491,GO:0016651,GO:0016655,GO:0019866,GO:0030964,GO:0031090,GO:0031966,GO:0031967,GO:0031975,GO:0032991,GO:0043226,GO:0043227,GO:0043229,GO:0043231,GO:0044237,GO:0044422,GO:…	ko:K03934
EXM06644.1	Aminotransferase class-V		0	NO_SP	0	0	FALSE	FALSE	noTP	Cytoplasm	cyto	Cytoplasmic			Non-effector	0			E	GO:0003674,GO:0003824,GO:0004648,GO:0005575,GO:0005622,GO:0005623,GO:0005737,GO:0006082,GO:0006139,GO:0006144,GO:0006520,GO:0006563,GO:0006564,GO:0006725,GO:0006807,GO:0008150,GO:0008152,GO:0008483,GO:0008652,GO:0009058,GO:0009069,GO:0009070,GO:0009112,GO:0009113,GO:0009987,GO:0016053,GO:0016740,GO:0016769,GO:0018130,GO:0019438,GO:0019752,GO:0034641,GO:0042440,GO:0043436,GO:0044237,GO:0044238,GO:…	ko:K00831
EXM06645.1	Proteasome subunit alpha type		0	NO_SP	0	0	FALSE	FALSE	noTP	Cytoplasm	cyto	Cytoplasmic			Non-effector	0			O	GO:0000502,GO:0005575,GO:0005622,GO:0005623,GO:0005634,GO:0005737,GO:0005829,GO:0005839,GO:0006508,GO:0006511,GO:0006807,GO:0007088,GO:0007346,GO:0008150,GO:0008152,GO:0009056,GO:0009057,GO:0009896,GO:0009987,GO:0010498,GO:0010499,GO:0010564,GO:0010638,GO:0010965,GO:0012505,GO:0016020,GO:0019538,GO:0019773,GO:0019941,GO:0030071,GO:0030163,GO:0031331,GO:0031597,GO:0032270,GO:0032436,GO:0032991,GO:…	ko:K02725
EXM06680.1	Belongs to the class-I pyridine nucleotide-disulfide oxidoreductase family		0	NO_SP	0	0	FALSE	FALSE	mTP	Plastid	mito	Membrane bound Mitochondrial			Non-effector	0	reduced_virulence		Q	GO:0003674,GO:0003824,GO:0004362,GO:0005575,GO:0005622,GO:0005623,GO:0005634,GO:0005737,GO:0005739,GO:0005829,GO:0006464,GO:0006518,GO:0006575,GO:0006749,GO:0006790,GO:0006807,GO:0006950,GO:0006979,GO:0008150,GO:0008152,GO:0009636,GO:0009987,GO:0010033,GO:0010731,GO:0015036,GO:0015037,GO:0015038,GO:0016209,GO:0016491,GO:0016651,GO:0016667,GO:0016668,GO:0019538,GO:0019725,GO:0033554,GO:0034599,GO:…	ko:K00383
EXM06684.1	Eps15 homology domain		0	NO_SP	0	0	FALSE	FALSE	noTP	Cytoplasm	cyto_nucl	Nuclear			Non-effector	0	reduced_virulence		TU	GO:0000147,GO:0003674,GO:0005488,GO:0005509,GO:0005515,GO:0005575,GO:0005622,GO:0005623,GO:0005737,GO:0005856,GO:0005933,GO:0005934,GO:0005935,GO:0005937,GO:0005938,GO:0006810,GO:0006886,GO:0006897,GO:0006950,GO:0006986,GO:0006996,GO:0007010,GO:0007154,GO:0007165,GO:0008104,GO:0008150,GO:0009987,GO:0010033,GO:0010564,GO:0015031,GO:0015629,GO:0015833,GO:0016043,GO:0016192,GO:0022607,GO:0023052,GO:…	ko:K12472
EXM06704.1	CFEM domain	Y	0	SP	0	0	FALSE	TRUE	SP	Cell_membrane	extr	Membrane bound Extracellular (Secreted)	Classical_membrane		Non-effector	0			S	GO:0005575,GO:0005618,GO:0005623,GO:0009277,GO:0030312,GO:0044464,GO:0071944	-
EXM06710.1	Conserved hypothetical protein		0	NO_SP	0	0	FALSE	FALSE	noTP	Cytoplasm	cyto_nucl	Extracellular (Secreted)			Cytoplasmic/apoplastic effector	0	loss_of_pathogenicity		S	-	-
EXM06723.1	Ceramide hydroxylase involved in the alpha-hydroxylation of sphingolipid-associated very long chain fatty acids. Hydroxylates the very long chain fatty acid of ceramides at C2 and C3		0	NO_SP	3	4	FALSE	FALSE	noTP	Endoplasmic_reticulum	plas	Membrane bound Endoplasmic reticulum			Non-effector	0	unaffected_pathogenicity		I	GO:0000170,GO:0003674,GO:0003824,GO:0005575,GO:0005622,GO:0005623,GO:0005737,GO:0005783,GO:0005789,GO:0006082,GO:0006629,GO:0006631,GO:0006643,GO:0006644,GO:0006664,GO:0006665,GO:0006673,GO:0006675,GO:0006687,GO:0006793,GO:0006796,GO:0006807,GO:0008150,GO:0008152,GO:0008610,GO:0009058,GO:0009987,GO:0012505,GO:0016020,GO:0016021,GO:0016491,GO:0019637,GO:0019752,GO:0030148,GO:0031224,GO:0031984,GO:…	ko:K19703
EXM06781.1	HAD superfamily hydrolase		0	NO_SP	0	0	FALSE	FALSE	noTP	Cytoplasm	cysk	Cytoplasmic			Non-effector	0	reduced_virulence		S	-	-
EXM06791.1	Belongs to the glutathione peroxidase family		0	NO_SP	0	0	FALSE	FALSE	mTP	Mitochondrion	mito	Mitochondrial			Cytoplasmic effector	0	reduced_virulence		E	GO:0000302,GO:0003674,GO:0003824,GO:0004601,GO:0004602,GO:0005575,GO:0005622,GO:0005623,GO:0005634,GO:0005737,GO:0005739,GO:0005740,GO:0005741,GO:0005743,GO:0005829,GO:0006950,GO:0006979,GO:0008150,GO:0008152,GO:0008379,GO:0009056,GO:0009636,GO:0009987,GO:0010035,GO:0016020,GO:0016209,GO:0016491,GO:0016684,GO:0016999,GO:0017001,GO:0017144,GO:0019725,GO:0019866,GO:0019867,GO:0019898,GO:0031090,GO:…	ko:K00432
EXM06813.1	ABC-type nitrate sulfonate bicarbonate transport systems periplasmic components-like protein		0	NO_SP	0	0	FALSE	FALSE	noTP	Cytoplasm	cyto	Membrane bound Mitochondrial			Non-effector	0			S	-	-
EXM06825.1	Belongs to the peptidase M18 family		0	NO_SP	0	0	FALSE	FALSE	mTP	Plastid	mito	Cytoplasmic			Non-effector	0	reduced_virulence		E	GO:0000322,GO:0000323,GO:0000324,GO:0003674,GO:0003824,GO:0004177,GO:0005575,GO:0005576,GO:0005622,GO:0005623,GO:0005737,GO:0005773,GO:0006508,GO:0006518,GO:0006807,GO:0007039,GO:0008150,GO:0008152,GO:0008233,GO:0008235,GO:0008237,GO:0008238,GO:0009056,GO:0009057,GO:0009987,GO:0016787,GO:0019538,GO:0030163,GO:0034641,GO:0043170,GO:0043226,GO:0043227,GO:0043229,GO:0043231,GO:0043603,GO:0044237,GO:…	ko:K01268
EXM06841.1	Catalyzes the NAD( )-dependent oxidation of formate to carbon dioxide. Formate oxidation is the final step in the methanol oxidation pathway in methylotrophic microorganisms. Has a role in the detoxification of exogenous formate in non- methylotrophic organisms		0	NO_SP	0	0	FALSE	FALSE	noTP	Cytoplasm	cyto	Cytoplasmic			Non-effector	0	reduced_virulence		C	GO:0003674,GO:0003824,GO:0005575,GO:0005622,GO:0005623,GO:0005737,GO:0005829,GO:0006082,GO:0008150,GO:0008152,GO:0008863,GO:0009056,GO:0009987,GO:0015942,GO:0016054,GO:0016491,GO:0016620,GO:0016903,GO:0016999,GO:0017001,GO:0017144,GO:0019752,GO:0032787,GO:0042183,GO:0042737,GO:0043436,GO:0044237,GO:0044248,GO:0044281,GO:0044282,GO:0044424,GO:0044444,GO:0044464,GO:0046395,GO:0055114,GO:0071704,GO:…	ko:K00122
EXM06864.1	Belongs to the isocitrate and isopropylmalate dehydrogenases family		0	NO_SP	0	0	FALSE	FALSE	noTP	Cytoplasm	cyto	Cytoplasmic			Non-effector	0	reduced_virulence		E	GO:0003674,GO:0003824,GO:0003862,GO:0005575,GO:0005622,GO:0005623,GO:0005737,GO:0005829,GO:0005975,GO:0006081,GO:0006082,GO:0006097,GO:0006520,GO:0006551,GO:0006807,GO:0008150,GO:0008152,GO:0008652,GO:0009058,GO:0009081,GO:0009082,GO:0009098,GO:0009987,GO:0016053,GO:0016491,GO:0016614,GO:0016616,GO:0019752,GO:0032787,GO:0043436,GO:0044237,GO:0044238,GO:0044249,GO:0044262,GO:0044281,GO:0044283,GO:…	ko:K00052
EXM06908.1	Belongs to the imidazoleglycerol-phosphate dehydratase family	Y	0	NO_SP	0	0	FALSE	FALSE	noTP	Cytoplasm	mito	Cytoplasmic			Non-effector	0	loss_of_pathogenicity		E	GO:0000105,GO:0003674,GO:0003824,GO:0004424,GO:0006082,GO:0006520,GO:0006547,GO:0006725,GO:0006807,GO:0008150,GO:0008152,GO:0008652,GO:0009058,GO:0009987,GO:0016053,GO:0016829,GO:0016835,GO:0016836,GO:0018130,GO:0019438,GO:0019752,GO:0034641,GO:0043436,GO:0044237,GO:0044238,GO:0044249,GO:0044281,GO:0044283,GO:0046394,GO:0046483,GO:0052803,GO:0071704,GO:1901360,GO:1901362,GO:1901564,GO:1901566,GO:…	ko:K01693
EXM06912.1	Belongs to the PI3 PI4-kinase family	Y	0	NO_SP	0	1	FALSE	FALSE	noTP	Cytoplasm	nucl	Cytoplasmic			Non-effector	0	lethal		G	GO:0000003,GO:0000122,GO:0000123,GO:0000124,GO:0000228,GO:0000785,GO:0000790,GO:0003674,GO:0003824,GO:0005575,GO:0005622,GO:0005623,GO:0005634,GO:0005654,GO:0005694,GO:0006139,GO:0006259,GO:0006281,GO:0006325,GO:0006338,GO:0006355,GO:0006357,GO:0006464,GO:0006473,GO:0006475,GO:0006725,GO:0006793,GO:0006796,GO:0006807,GO:0006950,GO:0006974,GO:0006996,GO:0007049,GO:0008150,GO:0008152,GO:0009889,GO:…	ko:K08874
EXM06926.1	Lea domain protein		0	NO_SP	0	0	FALSE	FALSE	mTP	Mitochondrion	mito	Mitochondrial			Cytoplasmic effector	0			S	-	-
EXM06939.1	component of the eukaryotic translation initiation factor 3 (eIF-3) complex, which is involved in protein synthesis of a specialized repertoire of mRNAs and, together with other initiation factors, stimulates binding of mRNA and methionyl-tRNAi to the 40S ribosome. The eIF-3 complex specifically targets and initiates translation of a subset of mRNAs involved in cell proliferation		0	NO_SP	0	0	FALSE	FALSE	noTP	Cytoplasm	nucl	Cytoplasmic			Non-effector	0			J	GO:0001732,GO:0002181,GO:0002183,GO:0003674,GO:0003676,GO:0003723,GO:0003743,GO:0005488,GO:0005575,GO:0005622,GO:0005623,GO:0005634,GO:0005737,GO:0005829,GO:0005852,GO:0006412,GO:0006413,GO:0006518,GO:0006807,GO:0008104,GO:0008135,GO:0008150,GO:0008152,GO:0009058,GO:0009059,GO:0009893,GO:0009894,GO:0009896,GO:0009987,GO:0010467,GO:0010604,GO:0016043,GO:0016282,GO:0019222,GO:0019538,GO:0022607,GO:…	ko:K03250
EXM06975.1	BPG-independent PGAM N-terminus (iPGM_N)		0	NO_SP	0	0	FALSE	FALSE	noTP	Cytoplasm	cyto	Cytoplasmic			Non-effector	0			G	-	ko:K15633
EXM07008.1	ATP-citrate synthase subunit 1		0	NO_SP	0	0	FALSE	FALSE	noTP	Peroxisome	cyto	Membrane bound Mitochondrial			Non-effector	0	loss_of_pathogenicity		C	GO:0003674,GO:0003824,GO:0003878,GO:0005575,GO:0005622,GO:0005623,GO:0005737,GO:0005829,GO:0006082,GO:0006084,GO:0006085,GO:0006091,GO:0006101,GO:0006139,GO:0006163,GO:0006164,GO:0006629,GO:0006631,GO:0006633,GO:0006637,GO:0006725,GO:0006732,GO:0006753,GO:0006790,GO:0006793,GO:0006796,GO:0006807,GO:0008150,GO:0008152,GO:0008610,GO:0009058,GO:0009108,GO:0009117,GO:0009150,GO:0009152,GO:0009165,GO:…	ko:K01648
EXM07010.1	ATP citrate lyase citrate-binding		0	NO_SP	0	0	FALSE	FALSE	noTP	Peroxisome	cyto	Cytoplasmic			Non-effector	0	loss_of_pathogenicity		C	GO:0003674,GO:0003824,GO:0003878,GO:0005575,GO:0005622,GO:0005623,GO:0005737,GO:0006082,GO:0006084,GO:0006085,GO:0006101,GO:0006139,GO:0006163,GO:0006164,GO:0006629,GO:0006631,GO:0006633,GO:0006637,GO:0006725,GO:0006732,GO:0006753,GO:0006790,GO:0006793,GO:0006796,GO:0006807,GO:0008150,GO:0008152,GO:0008610,GO:0009058,GO:0009108,GO:0009117,GO:0009150,GO:0009152,GO:0009165,GO:0009259,GO:0009260,GO:…	ko:K01648
EXM07036.1	Belongs to the mitochondrial carrier (TC 2.A.29) family		0	NO_SP	3	3	FALSE	FALSE	noTP	Mitochondrion	mito	Membrane bound Mitochondrial			Non-effector	0	reduced_virulence		C	GO:0000295,GO:0003674,GO:0005215,GO:0005346,GO:0005347,GO:0005471,GO:0005575,GO:0005622,GO:0005623,GO:0005737,GO:0005739,GO:0005740,GO:0005743,GO:0006091,GO:0006810,GO:0006811,GO:0006820,GO:0006839,GO:0006855,GO:0006862,GO:0006915,GO:0006996,GO:0007005,GO:0007006,GO:0008150,GO:0008152,GO:0008219,GO:0008509,GO:0008514,GO:0009060,GO:0009061,GO:0009987,GO:0012501,GO:0015075,GO:0015215,GO:0015216,GO:…	ko:K05863
EXM07037.1	S25 ribosomal protein		0	NO_SP	0	0	FALSE	FALSE	noTP	Cytoplasm	nucl	Cytoplasmic			Cytoplasmic effector	0			J	GO:0002181,GO:0003674,GO:0003735,GO:0005198,GO:0005575,GO:0005622,GO:0005623,GO:0005737,GO:0005829,GO:0005840,GO:0006412,GO:0006518,GO:0006807,GO:0008150,GO:0008152,GO:0009058,GO:0009059,GO:0009987,GO:0010467,GO:0015935,GO:0019538,GO:0022626,GO:0022627,GO:0032991,GO:0034641,GO:0034645,GO:0043043,GO:0043170,GO:0043226,GO:0043228,GO:0043229,GO:0043232,GO:0043603,GO:0043604,GO:0044237,GO:0044238,GO:…	ko:K02975
EXM07072.1	to UDP-galactopyranose mutase		0	NO_SP	0	0	FALSE	FALSE	noTP	Cytoplasm	cyto	Membrane bound Peroxisomal			Non-effector	0			H	-	-
EXM07097.1	Eukaryotic cytochrome b561	Y	0	NO_SP	6	6	FALSE	FALSE	noTP	Cell_membrane	plas	Plasma membrane	Classical_membrane		Non-effector	0			P	-	-
EXM07105.1	assists the folding of proteins upon ATP hydrolysis	Y	0	NO_SP	0	0	FALSE	FALSE	noTP	Mitochondrion	cyto	Mitochondrial			Non-effector	0	reduced_virulence		O	GO:0003674,GO:0005488,GO:0005515,GO:0005575,GO:0005622,GO:0005623,GO:0005737,GO:0005829,GO:0005832,GO:0005856,GO:0006457,GO:0006458,GO:0008150,GO:0009987,GO:0032991,GO:0043226,GO:0043228,GO:0043229,GO:0043232,GO:0044183,GO:0044424,GO:0044444,GO:0044445,GO:0044464,GO:0051082,GO:0061077,GO:0101031	ko:K09495
EXM07121.1	Belongs to the glycosyl hydrolase 31 family		0	SP	0	0	FALSE	TRUE	SP	Extracellular	extr	Membrane bound Extracellular (Secreted)	Classical_membrane	GH31	Non-effector	0	reduced_virulence		G	GO:0000271,GO:0003674,GO:0003824,GO:0004553,GO:0005575,GO:0005622,GO:0005623,GO:0005737,GO:0005739,GO:0005783,GO:0005788,GO:0005975,GO:0005976,GO:0006073,GO:0006464,GO:0006486,GO:0006487,GO:0006491,GO:0006807,GO:0008150,GO:0008152,GO:0009058,GO:0009059,GO:0009100,GO:0009101,GO:0009250,GO:0009272,GO:0009987,GO:0010383,GO:0012505,GO:0015926,GO:0016051,GO:0016787,GO:0016798,GO:0017177,GO:0019538,GO:…	ko:K05546
EXM07140.1	Haem-degrading		0	NO_SP	0	0	FALSE	FALSE	noTP	Cytoplasm	cyto	Cytoplasmic			Apoplastic effector	0			S	GO:0005575,GO:0005622,GO:0005623,GO:0005737,GO:0005829,GO:0006605,GO:0006612,GO:0006620,GO:0006810,GO:0006886,GO:0006996,GO:0007029,GO:0008104,GO:0008150,GO:0009987,GO:0010256,GO:0015031,GO:0015833,GO:0016043,GO:0032991,GO:0033036,GO:0033365,GO:0034613,GO:0042886,GO:0044424,GO:0044444,GO:0044445,GO:0044464,GO:0045047,GO:0045184,GO:0046907,GO:0051179,GO:0051234,GO:0051641,GO:0051649,GO:0061024,GO:…	-
EXM07152.1	Protein of unknown function (DUF971)	Y	0	NO_SP	0	0	FALSE	FALSE	mTP	Mitochondrion	mito	Mitochondrial			Non-effector	0	loss_of_pathogenicity__reduced_virulence		I	-	-
EXM07163.1	3-beta hydroxysteroid dehydrogenase/isomerase family		0	NO_SP	0	0	FALSE	FALSE	noTP	Cytoplasm	cyto	Cytoplasmic			Cytoplasmic effector	0			S	-	-
EXM07176.1	to ankyrin repeat protein	Y	0	NO_SP	0	0	FALSE	FALSE	noTP	Cytoplasm	cyto	Mitochondrial			Non-effector	0	unaffected_pathogenicity		M	-	ko:K21440
EXM07181.1	TATA-binding protein interacting (TIP20)		0	NO_SP	0	0	FALSE	FALSE	noTP	Cytoplasm	cyto	Cytoplasmic			Non-effector	0			S	GO:0000003,GO:0000151,GO:0000909,GO:0003006,GO:0005575,GO:0005622,GO:0005623,GO:0005634,GO:0006464,GO:0006508,GO:0006511,GO:0006725,GO:0006807,GO:0007049,GO:0007275,GO:0008150,GO:0008152,GO:0009056,GO:0009057,GO:0009404,GO:0009653,GO:0009712,GO:0009987,GO:0010265,GO:0010498,GO:0016043,GO:0016567,GO:0016999,GO:0017144,GO:0018904,GO:0018940,GO:0018958,GO:0019005,GO:0019222,GO:0019538,GO:0019748,GO:…	ko:K17263
EXM07210.1	Insulinase (Peptidase family M16)		0	NO_SP	1	0	FALSE	FALSE	SP	Endoplasmic_reticulum	golg	Plasma membrane	Classical_membrane		Non-effector	0			O	GO:0003674,GO:0003824,GO:0004175,GO:0004222,GO:0005575,GO:0005622,GO:0005623,GO:0005737,GO:0006508,GO:0006807,GO:0006996,GO:0007005,GO:0008150,GO:0008152,GO:0008233,GO:0008237,GO:0009056,GO:0009057,GO:0009987,GO:0016043,GO:0016787,GO:0019538,GO:0030163,GO:0035694,GO:0043170,GO:0044237,GO:0044238,GO:0044248,GO:0044257,GO:0044260,GO:0044265,GO:0044267,GO:0044424,GO:0044464,GO:0070011,GO:0071704,GO:…	-
EXM07221.1	Peptidase M16C associated		0	NO_SP	0	0	FALSE	FALSE	noTP	Mitochondrion	cyto	Nuclear			Non-effector	0			O	GO:0003674,GO:0003824,GO:0004175,GO:0004222,GO:0005575,GO:0005622,GO:0005623,GO:0005737,GO:0005739,GO:0005740,GO:0005758,GO:0006508,GO:0006605,GO:0006626,GO:0006627,GO:0006807,GO:0006810,GO:0006839,GO:0006886,GO:0006996,GO:0007005,GO:0008104,GO:0008150,GO:0008152,GO:0008233,GO:0008237,GO:0009056,GO:0009057,GO:0009987,GO:0010033,GO:0010467,GO:0015031,GO:0015833,GO:0016043,GO:0016485,GO:0016787,GO:…	ko:K06972
EXM07229.1	Belongs to the histidine acid phosphatase family		0	SP	1	1	FALSE	FALSE	SP	Cell_membrane	extr	Plasma membrane	Classical_membrane		Non-effector	0	unaffected_pathogenicity		S	-	-
EXM07239.1	Belongs to the eukaryotic ribosomal protein eL38 family		0	NO_SP	0	0	FALSE	FALSE	noTP	Nucleus	nucl	Cytoplasmic			Cytoplasmic effector	0			J	GO:0002181,GO:0003674,GO:0003676,GO:0003723,GO:0003735,GO:0005198,GO:0005488,GO:0005575,GO:0005622,GO:0005623,GO:0005737,GO:0005829,GO:0005840,GO:0006412,GO:0006518,GO:0006807,GO:0008150,GO:0008152,GO:0009058,GO:0009059,GO:0009987,GO:0010467,GO:0015934,GO:0016043,GO:0019538,GO:0022607,GO:0022613,GO:0022618,GO:0022625,GO:0022626,GO:0032991,GO:0034622,GO:0034641,GO:0034645,GO:0043043,GO:0043170,GO:…	ko:K02923
EXM07240.1	-	Y	0	NO_SP	0	0	FALSE	FALSE	noTP	Cytoplasm	cysk	Cytoplasmic			Cytoplasmic effector	0			-	-	-
EXM07335.1	The coatomer is a cytosolic protein complex that binds to dilysine motifs and reversibly associates with Golgi non- clathrin-coated vesicles, which further mediate biosynthetic protein transport from the ER, via the Golgi up to the trans Golgi network. Coatomer complex is required for budding from Golgi membranes, and is essential for the retrograde Golgi-to-ER transport of dilysine-tagged protei…		0	NO_SP	0	0	FALSE	FALSE	noTP	Cytoplasm	mito	Cytoplasmic			Non-effector	0	loss_of_pathogenicity		U	GO:0003674,GO:0005488,GO:0005515,GO:0005575,GO:0005622,GO:0005623,GO:0005737,GO:0005794,GO:0005798,GO:0006810,GO:0006886,GO:0006888,GO:0006890,GO:0006891,GO:0007034,GO:0008104,GO:0008150,GO:0012505,GO:0012506,GO:0015031,GO:0015833,GO:0016020,GO:0016192,GO:0016197,GO:0030117,GO:0030120,GO:0030126,GO:0030135,GO:0030137,GO:0030659,GO:0030660,GO:0030662,GO:0030663,GO:0031090,GO:0031410,GO:0031982,GO:…	ko:K17302
EXM07337.1	Belongs to the GPI family		0	NO_SP	0	0	FALSE	FALSE	noTP	Peroxisome	cyto	Cytoplasmic			Non-effector	0	reduced_virulence		G	GO:0003674,GO:0003824,GO:0004347,GO:0005575,GO:0005576,GO:0005622,GO:0005623,GO:0005737,GO:0005739,GO:0005829,GO:0005886,GO:0005975,GO:0005996,GO:0006006,GO:0006007,GO:0006081,GO:0006082,GO:0006090,GO:0006091,GO:0006094,GO:0006096,GO:0006098,GO:0006139,GO:0006163,GO:0006164,GO:0006165,GO:0006725,GO:0006732,GO:0006733,GO:0006734,GO:0006735,GO:0006739,GO:0006753,GO:0006754,GO:0006757,GO:0006793,GO:…	ko:K01810
EXM07419.1	Occurs in almost all aerobically respiring organisms and serves to protect cells from the toxic effects of hydrogen peroxide		0	NO_SP	0	0	FALSE	FALSE	noTP	Peroxisome	cyto_mito	Cytoplasmic			Non-effector	0	reduced_virulence__unaffected_pathogenicity		Q	GO:0000302,GO:0001306,GO:0001315,GO:0003674,GO:0003824,GO:0004096,GO:0004601,GO:0005488,GO:0005575,GO:0005618,GO:0005622,GO:0005623,GO:0005737,GO:0005739,GO:0005759,GO:0005777,GO:0005782,GO:0006950,GO:0006979,GO:0007154,GO:0007568,GO:0007571,GO:0008150,GO:0008152,GO:0009056,GO:0009267,GO:0009277,GO:0009405,GO:0009605,GO:0009636,GO:0009987,GO:0009991,GO:0010035,GO:0016209,GO:0016491,GO:0016684,GO:…	ko:K03781
EXM07454.1	Glyco_18		0	SP	0	0	FALSE	FALSE	SP	Extracellular	extr	Membrane bound Extracellular (Secreted)	Classical_secreted	GH18	Non-effector	0	reduced_virulence		G	-	ko:K01183
EXM07589.1	Mitochondrial peroxiredoxin PRX1		0	NO_SP	0	0	FALSE	FALSE	noTP	Cytoplasm	cyto	Cytoplasmic			Non-effector	0	reduced_virulence		O	-	-
EXM07607.1	Belongs to the pyruvate kinase family	Y	0	NO_SP	0	0	FALSE	FALSE	noTP	Cytoplasm	cyto	Membrane bound Mitochondrial			Non-effector	0	unaffected_pathogenicity__reduced_virulence__loss_of_pathogenicity		G	GO:0003674,GO:0003824,GO:0004743,GO:0005575,GO:0005618,GO:0005622,GO:0005623,GO:0005737,GO:0005739,GO:0005829,GO:0005886,GO:0005975,GO:0005996,GO:0006006,GO:0006007,GO:0006082,GO:0006090,GO:0006091,GO:0006096,GO:0006139,GO:0006163,GO:0006164,GO:0006165,GO:0006725,GO:0006732,GO:0006733,GO:0006734,GO:0006735,GO:0006753,GO:0006754,GO:0006757,GO:0006793,GO:0006796,GO:0006807,GO:0006950,GO:0007154,GO:…	ko:K00873
EXM07608.1	Belongs to the pyruvate kinase family		0	NO_SP	0	0	FALSE	FALSE	noTP	Plastid	cyto	Cytoplasmic			Non-effector	0	unaffected_pathogenicity__reduced_virulence__loss_of_pathogenicity		G	GO:0003674,GO:0003824,GO:0004743,GO:0005575,GO:0005618,GO:0005622,GO:0005623,GO:0005737,GO:0005739,GO:0005829,GO:0005886,GO:0005975,GO:0005996,GO:0006006,GO:0006007,GO:0006082,GO:0006090,GO:0006091,GO:0006096,GO:0006139,GO:0006163,GO:0006164,GO:0006165,GO:0006725,GO:0006732,GO:0006733,GO:0006734,GO:0006735,GO:0006753,GO:0006754,GO:0006757,GO:0006793,GO:0006796,GO:0006807,GO:0006950,GO:0007154,GO:…	ko:K00873
EXM07694.1	Pyrophosphatase that hydrolyzes non-canonical purine nucleotides such as inosine triphosphate (ITP), deoxyinosine triphosphate (dITP) or xanthosine 5'-triphosphate (XTP) to their respective monophosphate derivatives. The enzyme does not distinguish between the deoxy- and ribose forms. Probably excludes non-canonical purines from RNA and DNA precursor pools, thus preventing their incorporation int…		0	NO_SP	0	0	FALSE	FALSE	noTP	Cytoplasm	cyto	Extracellular (Secreted)			Non-effector	0			F	GO:0003674,GO:0003824,GO:0004170,GO:0005575,GO:0005622,GO:0005623,GO:0005634,GO:0005737,GO:0006139,GO:0006725,GO:0006753,GO:0006793,GO:0006796,GO:0006807,GO:0006950,GO:0006974,GO:0008150,GO:0008152,GO:0008828,GO:0009056,GO:0009058,GO:0009141,GO:0009143,GO:0009144,GO:0009146,GO:0009147,GO:0009149,GO:0009200,GO:0009204,GO:0009211,GO:0009213,GO:0009215,GO:0009217,GO:0009987,GO:0016462,GO:0016787,GO:…	ko:K01519,ko:K18532
EXM07699.1	Belongs to the D-isomer specific 2-hydroxyacid dehydrogenase family		0	NO_SP	0	0	FALSE	FALSE	noTP	Cytoplasm	cyto	Cytoplasmic			Non-effector	0	reduced_virulence		E	GO:0003674,GO:0003824,GO:0004617,GO:0005575,GO:0005622,GO:0005623,GO:0005737,GO:0006082,GO:0006520,GO:0006563,GO:0006564,GO:0006807,GO:0008150,GO:0008152,GO:0008652,GO:0009058,GO:0009069,GO:0009070,GO:0009987,GO:0016053,GO:0016491,GO:0016614,GO:0016616,GO:0019752,GO:0043436,GO:0044237,GO:0044238,GO:0044249,GO:0044281,GO:0044283,GO:0044424,GO:0044464,GO:0046394,GO:0047545,GO:0055114,GO:0061759,GO:…	ko:K00058
EXM07702.1	Nucleosome assembly protein	Y	0	NO_SP	0	0	FALSE	FALSE	noTP	Nucleus	cyto_nucl	Nuclear			Cytoplasmic effector	0	reduced_virulence		BD	GO:0000003,GO:0000228,GO:0000785,GO:0000790,GO:0003674,GO:0005488,GO:0005515,GO:0005575,GO:0005622,GO:0005623,GO:0005634,GO:0005694,GO:0005737,GO:0005856,GO:0005938,GO:0005940,GO:0006323,GO:0006325,GO:0006333,GO:0006334,GO:0006336,GO:0006337,GO:0006355,GO:0006357,GO:0006606,GO:0006810,GO:0006886,GO:0006913,GO:0006996,GO:0007114,GO:0007117,GO:0008047,GO:0008104,GO:0008150,GO:0009889,GO:0009891,GO:…	ko:K11279
EXM07720.1	Catalyzes the reaction of cyanate with bicarbonate to produce ammonia and carbon dioxide		0	NO_SP	0	0	FALSE	FALSE	noTP	Cytoplasm	cyto	Cytoplasmic			Cytoplasmic effector	0	unaffected_pathogenicity		H	-	ko:K01725
EXM07741.1	to tropomyosin 1		0	NO_SP	0	0	FALSE	FALSE	noTP	Golgi_apparatus	nucl	Cytoplasmic			Cytoplasmic effector	0			Z	GO:0000001,GO:0000003,GO:0000011,GO:0000142,GO:0000278,GO:0000281,GO:0000746,GO:0000747,GO:0000755,GO:0000910,GO:0000912,GO:0000915,GO:0000916,GO:0003674,GO:0003779,GO:0003786,GO:0005488,GO:0005515,GO:0005575,GO:0005622,GO:0005623,GO:0005737,GO:0005826,GO:0005856,GO:0005884,GO:0005933,GO:0005935,GO:0005937,GO:0005938,GO:0006403,GO:0006810,GO:0006887,GO:0006996,GO:0007005,GO:0007010,GO:0007015,GO:…	ko:K17945
EXM07746.1	PPIases accelerate the folding of proteins. It catalyzes the cis-trans isomerization of proline imidic peptide bonds in oligopeptides		0	SP	0	0	FALSE	FALSE	SP	Lysosome/Vacuole	extr	Membrane bound Endoplasmic reticulum	Classical_secreted		Cytoplasmic effector	0	reduced_virulence	Y	O	GO:0000322,GO:0000323,GO:0000324,GO:0000413,GO:0003674,GO:0003755,GO:0003824,GO:0005575,GO:0005622,GO:0005623,GO:0005737,GO:0005773,GO:0005783,GO:0005788,GO:0006457,GO:0006464,GO:0006807,GO:0008150,GO:0008152,GO:0009987,GO:0012505,GO:0016853,GO:0016859,GO:0018193,GO:0018208,GO:0019538,GO:0031974,GO:0034975,GO:0036211,GO:0043170,GO:0043226,GO:0043227,GO:0043229,GO:0043231,GO:0043233,GO:0043412,GO:…	ko:K01802,ko:K03768,ko:K03770
EXM07749.1	Belongs to the metallo-dependent hydrolases superfamily. Peptidase M19 family	Y	0	NO_SP	0	1	FALSE	FALSE	noTP	Endoplasmic_reticulum	mito	Membrane bound Mitochondrial			Non-effector	0			O	-	ko:K01273
EXM07809.1	Elongation factor 1 gamma, conserved domain	Y	0	NO_SP	0	0	FALSE	FALSE	noTP	Cytoplasm	cyto_nucl	Membrane bound Endoplasmic reticulum			Cytoplasmic effector	0			J	GO:0001047,GO:0001067,GO:0003674,GO:0003676,GO:0003677,GO:0003700,GO:0003723,GO:0003746,GO:0005085,GO:0005488,GO:0005509,GO:0005515,GO:0005543,GO:0005575,GO:0005622,GO:0005623,GO:0005634,GO:0005737,GO:0005739,GO:0005840,GO:0005853,GO:0006355,GO:0006357,GO:0006412,GO:0006414,GO:0006417,GO:0006449,GO:0006518,GO:0006807,GO:0008135,GO:0008150,GO:0008152,GO:0008289,GO:0009058,GO:0009059,GO:0009889,GO:…	ko:K03233
EXM07843.1	Patatin-like phospholipase	Y	0	NO_SP	0	0	FALSE	FALSE	noTP	Peroxisome	mito	Membrane bound Mitochondrial			Non-effector	0	reduced_virulence		I	-	-
EXM07857.1	Belongs to the nucleosome assembly protein (NAP) family		0	NO_SP	0	0	FALSE	FALSE	noTP	Nucleus	cyto	Cytoplasmic			Cytoplasmic effector	0			L	GO:0000228,GO:0000775,GO:0000785,GO:0000790,GO:0001672,GO:0003674,GO:0005488,GO:0005515,GO:0005575,GO:0005622,GO:0005623,GO:0005634,GO:0005694,GO:0006325,GO:0006333,GO:0006337,GO:0006996,GO:0008150,GO:0009987,GO:0010639,GO:0010847,GO:0016043,GO:0022411,GO:0031333,GO:0031498,GO:0031974,GO:0031981,GO:0032984,GO:0032986,GO:0033043,GO:0033044,GO:0034506,GO:0034728,GO:0042393,GO:0043226,GO:0043227,GO:…	-
EXM07916.1	Belongs to the actin family		0	NO_SP	0	0	FALSE	FALSE	noTP	Cytoplasm	cysk	Cytoplasmic			Non-effector	0	reduced_virulence		Z	GO:0000001,GO:0000003,GO:0000011,GO:0000123,GO:0000132,GO:0000142,GO:0000226,GO:0000228,GO:0000278,GO:0000281,GO:0000785,GO:0000790,GO:0000812,GO:0000910,GO:0000912,GO:0000915,GO:0000916,GO:0001300,GO:0001411,GO:0002790,GO:0003006,GO:0003674,GO:0005198,GO:0005200,GO:0005575,GO:0005622,GO:0005623,GO:0005628,GO:0005634,GO:0005654,GO:0005694,GO:0005737,GO:0005826,GO:0005829,GO:0005856,GO:0005884,GO:…	ko:K05692
EXM08027.1	Belongs to the Glu Leu Phe Val dehydrogenases family		0	NO_SP	0	0	FALSE	FALSE	noTP	Peroxisome	cyto	Cytoplasmic			Non-effector	0			E	GO:0001505,GO:0003674,GO:0003824,GO:0004353,GO:0004354,GO:0005575,GO:0005576,GO:0005622,GO:0005623,GO:0005634,GO:0005737,GO:0005739,GO:0005829,GO:0006082,GO:0006520,GO:0006536,GO:0006537,GO:0006541,GO:0006807,GO:0008150,GO:0008152,GO:0008652,GO:0009058,GO:0009064,GO:0009084,GO:0009987,GO:0010033,GO:0016053,GO:0016491,GO:0016638,GO:0016639,GO:0017144,GO:0019676,GO:0019740,GO:0019752,GO:0030447,GO:…	ko:K00262
EXM08031.1	Belongs to the TRAFAC class dynamin-like GTPase superfamily. Dynamin Fzo YdjA family		0	NO_SP	0	0	FALSE	FALSE	noTP	Cytoplasm	cyto_nucl	Cytoplasmic			Non-effector	0	lethal		U	GO:0000266,GO:0000322,GO:0000323,GO:0000324,GO:0000329,GO:0003373,GO:0003374,GO:0003674,GO:0003774,GO:0003824,GO:0003924,GO:0005488,GO:0005515,GO:0005575,GO:0005622,GO:0005623,GO:0005737,GO:0005739,GO:0005740,GO:0005741,GO:0005768,GO:0005770,GO:0005773,GO:0005774,GO:0005777,GO:0005829,GO:0005856,GO:0005938,GO:0006605,GO:0006623,GO:0006810,GO:0006886,GO:0006897,GO:0006996,GO:0007005,GO:0007010,GO:…	ko:K17065
EXM08143.1	component of the eukaryotic translation initiation factor 3 (eIF-3) complex, which is involved in protein synthesis of a specialized repertoire of mRNAs and, together with other initiation factors, stimulates binding of mRNA and methionyl-tRNAi to the 40S ribosome. The eIF-3 complex specifically targets and initiates translation of a subset of mRNAs involved in cell proliferation		0	NO_SP	0	0	FALSE	FALSE	noTP	Cytoplasm	nucl	Cytoplasmic			Cytoplasmic effector	0			J	GO:0001732,GO:0002181,GO:0002183,GO:0005575,GO:0005622,GO:0005623,GO:0005737,GO:0005852,GO:0006412,GO:0006413,GO:0006518,GO:0006807,GO:0008150,GO:0008152,GO:0009058,GO:0009059,GO:0009987,GO:0010033,GO:0010467,GO:0016043,GO:0016282,GO:0019538,GO:0022607,GO:0022613,GO:0022618,GO:0032991,GO:0033993,GO:0034622,GO:0034641,GO:0034645,GO:0042221,GO:0043043,GO:0043170,GO:0043603,GO:0043604,GO:0043933,GO:…	ko:K15030
EXM08225.1	Involved in the synthesis of the GDP-mannose and dolichol-phosphate-mannose required for a number of critical mannosyl transfer reactions		0	NO_SP	0	0	FALSE	FALSE	noTP	Cytoplasm	cyto	Cytoplasmic			Cytoplasmic effector	0			I	GO:0003674,GO:0003824,GO:0004615,GO:0005575,GO:0005576,GO:0005622,GO:0005623,GO:0005737,GO:0005829,GO:0005975,GO:0005996,GO:0006013,GO:0006464,GO:0006486,GO:0006487,GO:0006605,GO:0006807,GO:0006810,GO:0006886,GO:0008104,GO:0008150,GO:0008152,GO:0009058,GO:0009059,GO:0009100,GO:0009101,GO:0009987,GO:0010494,GO:0015031,GO:0015833,GO:0016853,GO:0016866,GO:0016868,GO:0019318,GO:0019538,GO:0031012,GO:…	ko:K17497
EXM08246.1	Possible Fer4-like domain in RNase L inhibitor, RLI		0	NO_SP	0	0	FALSE	FALSE	noTP	Cytoplasm	mito	Cytoplasmic			Non-effector	0	reduced_virulence		A	GO:0000054,GO:0000166,GO:0002181,GO:0002183,GO:0003674,GO:0003824,GO:0005488,GO:0005506,GO:0005524,GO:0005575,GO:0005622,GO:0005623,GO:0005634,GO:0005737,GO:0006403,GO:0006405,GO:0006412,GO:0006413,GO:0006415,GO:0006417,GO:0006518,GO:0006611,GO:0006807,GO:0006810,GO:0006886,GO:0006913,GO:0006996,GO:0008104,GO:0008144,GO:0008150,GO:0008152,GO:0009058,GO:0009059,GO:0009889,GO:0009891,GO:0009893,GO:…	ko:K06174
EXM08309.1	Mediates the uptake of pyruvate into mitochondria		0	NO_SP	1	0	FALSE	FALSE	noTP	Mitochondrion	mito	Membrane bound Mitochondrial			Cytoplasmic effector	0			C	-	ko:K22138
EXM08310.1	Catalyzes a 2-step reaction, involving the ATP-dependent carboxylation of the covalently attached biotin in the first step and the transfer of the carboxyl group to pyruvate in the second		0	NO_SP	0	0	FALSE	FALSE	noTP	Cytoplasm	cyto	Cytoplasmic			Non-effector	0	unaffected_pathogenicity		C	GO:0003674,GO:0003824,GO:0004736,GO:0005575,GO:0005622,GO:0005623,GO:0005737,GO:0005829,GO:0005975,GO:0005996,GO:0006006,GO:0006091,GO:0006094,GO:0008150,GO:0008152,GO:0009058,GO:0009987,GO:0016051,GO:0016874,GO:0016885,GO:0019318,GO:0019319,GO:0044237,GO:0044238,GO:0044281,GO:0044283,GO:0044424,GO:0044444,GO:0044464,GO:0046364,GO:0071704,GO:1901576	ko:K01958
EXM08335.1	to fumarylacetoacetate hydrolase family		0	NO_SP	0	0	FALSE	FALSE	mTP	Mitochondrion	mito	Mitochondrial			Non-effector	0	unaffected_pathogenicity		Q	GO:0003674,GO:0003824,GO:0005575,GO:0005622,GO:0005623,GO:0005737,GO:0005739,GO:0006082,GO:0006520,GO:0006570,GO:0006572,GO:0006725,GO:0006807,GO:0008150,GO:0008152,GO:0009056,GO:0009063,GO:0009072,GO:0009074,GO:0009987,GO:0016054,GO:0016787,GO:0016822,GO:0016823,GO:0019439,GO:0019752,GO:0043226,GO:0043227,GO:0043229,GO:0043231,GO:0043436,GO:0044237,GO:0044238,GO:0044248,GO:0044281,GO:0044282,GO:…	ko:K01557
EXM08405.1	Mannan endo-1,6-alpha-mannosidase		0	SP	1	1	FALSE	TRUE	SP	Extracellular	extr	Membrane bound Extracellular (Secreted)	Classical_membrane	GH76	Non-effector	0			G	GO:0000003,GO:0005575,GO:0005618,GO:0005622,GO:0005623,GO:0005737,GO:0005783,GO:0005886,GO:0007114,GO:0007117,GO:0007124,GO:0008150,GO:0009272,GO:0009277,GO:0009607,GO:0009987,GO:0012505,GO:0016020,GO:0016043,GO:0016049,GO:0019954,GO:0022414,GO:0030312,GO:0030447,GO:0031224,GO:0031225,GO:0031226,GO:0031505,GO:0032505,GO:0035690,GO:0036180,GO:0040007,GO:0042221,GO:0042493,GO:0042546,GO:0043226,GO:…	ko:K08257
EXM08468.1	KH domain		0	NO_SP	0	0	FALSE	FALSE	noTP	Cytoplasm	cysk	Nuclear			Non-effector	0			A	GO:0000228,GO:0000723,GO:0000781,GO:0000784,GO:0000932,GO:0001932,GO:0001933,GO:0003674,GO:0003676,GO:0003723,GO:0003729,GO:0003730,GO:0005488,GO:0005575,GO:0005622,GO:0005623,GO:0005634,GO:0005694,GO:0005737,GO:0006139,GO:0006259,GO:0006278,GO:0006403,GO:0006725,GO:0006807,GO:0006996,GO:0007004,GO:0008150,GO:0008152,GO:0008298,GO:0009058,GO:0009059,GO:0009892,GO:0009893,GO:0009894,GO:0009895,GO:…	ko:K18738
EXM08595.1	Fibronectin type III-like domain	Y	0	NO_SP	0	0	FALSE	FALSE	noTP	Peroxisome	cyto	Cytoplasmic		GH3	Non-effector	0	unaffected_pathogenicity		G	-	ko:K05349
EXM08658.1	-		0	NO_SP	0	0	FALSE	FALSE	noTP	Cytoplasm	cyto_nucl	Extracellular (Secreted)			Non-effector	0			-	-	-
EXM08724.1	Endoribonuclease L-PSP	Y	0	NO_SP	0	0	FALSE	FALSE	noTP	Cytoplasm	nucl	Cytoplasmic			Cytoplasmic effector	0			J	-	-
EXM08845.1	acetyl-CoA hydrolase		0	NO_SP	0	0	FALSE	FALSE	noTP	Mitochondrion	cyto	Membrane bound Mitochondrial			Non-effector	0			C	GO:0003674,GO:0003824,GO:0003986,GO:0005575,GO:0005622,GO:0005623,GO:0005737,GO:0005739,GO:0005829,GO:0006082,GO:0006083,GO:0006084,GO:0006139,GO:0006163,GO:0006629,GO:0006631,GO:0006633,GO:0006637,GO:0006725,GO:0006732,GO:0006753,GO:0006790,GO:0006793,GO:0006796,GO:0006807,GO:0008150,GO:0008152,GO:0008410,GO:0008610,GO:0008775,GO:0009058,GO:0009117,GO:0009150,GO:0009259,GO:0009268,GO:0009628,GO:…	ko:K01067
EXM08927.1	WSC domain		0	SP	0	0	FALSE	TRUE	SP	Cell_membrane	extr	Membrane bound Extracellular (Secreted)	Classical_membrane		Apoplastic effector	0	unaffected_pathogenicity		S	-	-
EXM08928.1	Cobalamin-independent synthase, Catalytic domain		0	NO_SP	0	0	FALSE	FALSE	noTP	Cytoplasm	cyto	Cytoplasmic			Non-effector	0			E	-	-
EXM08932.1	Belongs to the ABC transporter superfamily. ABCG family. PDR (TC 3.A.1.205) subfamily		0	NO_SP	12	12	FALSE	FALSE	noTP	Cell_membrane	plas	Plasma membrane	Classical_membrane		Non-effector	0	reduced_virulence		Q	GO:0000166,GO:0000322,GO:0000323,GO:0000324,GO:0000724,GO:0000725,GO:0003674,GO:0003824,GO:0004012,GO:0005215,GO:0005319,GO:0005488,GO:0005496,GO:0005524,GO:0005548,GO:0005575,GO:0005622,GO:0005623,GO:0005737,GO:0005739,GO:0005773,GO:0005783,GO:0005886,GO:0006139,GO:0006259,GO:0006281,GO:0006302,GO:0006310,GO:0006725,GO:0006807,GO:0006810,GO:0006811,GO:0006820,GO:0006855,GO:0006869,GO:0006873,GO:…	ko:K08711,ko:K08712
EXM08972.1	Glycosyl hydrolase family 81		0	NO_SP	0	0	FALSE	FALSE	noTP	Peroxisome	cyto	Membrane bound Mitochondrial		GH81	Non-effector	0			G	GO:0000003,GO:0000272,GO:0000746,GO:0000747,GO:0000920,GO:0000935,GO:0000936,GO:0001871,GO:0003006,GO:0003674,GO:0003824,GO:0004338,GO:0004553,GO:0005488,GO:0005575,GO:0005576,GO:0005618,GO:0005622,GO:0005623,GO:0005856,GO:0005933,GO:0005935,GO:0005937,GO:0005975,GO:0005976,GO:0006073,GO:0006074,GO:0006076,GO:0006996,GO:0007010,GO:0007049,GO:0008150,GO:0008152,GO:0008422,GO:0009056,GO:0009057,GO:…	ko:K01180
EXM08996.1	Phosphate acyltransferases		0	NO_SP	3	3	FALSE	FALSE	noTP	Cell_membrane	plas	Membrane bound Mitochondrial	Classical_membrane		Non-effector	0	reduced_virulence		I	GO:0003674,GO:0003824,GO:0004366,GO:0005575,GO:0005622,GO:0005623,GO:0005737,GO:0005783,GO:0005789,GO:0006629,GO:0006644,GO:0006793,GO:0006796,GO:0008150,GO:0008152,GO:0008374,GO:0008610,GO:0008654,GO:0009058,GO:0009987,GO:0012505,GO:0016020,GO:0016021,GO:0016287,GO:0016407,GO:0016413,GO:0016740,GO:0016746,GO:0016747,GO:0019637,GO:0030176,GO:0031224,GO:0031227,GO:0031984,GO:0042175,GO:0043226,GO:…	ko:K13507
EXM08998.1	Ubiquitin-2 like Rad60 SUMO-like		0	NO_SP	0	0	FALSE	FALSE	noTP	Cytoplasm	cyto_nucl	Cytoplasmic			Cytoplasmic effector	0	reduced_virulence__unaffected_pathogenicity		O	GO:0000003,GO:0000209,GO:0003006,GO:0003674,GO:0005488,GO:0005515,GO:0005575,GO:0005622,GO:0005623,GO:0005737,GO:0006464,GO:0006508,GO:0006513,GO:0006807,GO:0007049,GO:0008150,GO:0008152,GO:0009056,GO:0009057,GO:0009653,GO:0009987,GO:0010498,GO:0010499,GO:0016567,GO:0016579,GO:0019538,GO:0019953,GO:0022402,GO:0022413,GO:0022414,GO:0030154,GO:0030163,GO:0030435,GO:0030437,GO:0031386,GO:0032446,GO:…	ko:K08770
EXM09033.1	to dienelactone hydrolase		0	NO_SP	0	0	FALSE	FALSE	noTP	Cytoplasm	cyto	Cytoplasmic			Cytoplasmic effector	0			Q	-	ko:K01061
EXM09065.1	Woronin body major protein		0	NO_SP	0	0	FALSE	FALSE	noTP	Lysosome/Vacuole	nucl	Cytoplasmic			Cytoplasmic effector	0	unaffected_pathogenicity		J	GO:0005575,GO:0005622,GO:0005623,GO:0005737,GO:0005777,GO:0042579,GO:0043226,GO:0043227,GO:0043229,GO:0043231,GO:0044424,GO:0044444,GO:0044464	-
EXM09067.1	GMP synthase		0	NO_SP	0	0	FALSE	FALSE	noTP	Cytoplasm	cysk	Membrane bound Mitochondrial			Non-effector	0	loss_of_pathogenicity		F	GO:0003674,GO:0003824,GO:0003921,GO:0003922,GO:0006139,GO:0006163,GO:0006164,GO:0006177,GO:0006725,GO:0006753,GO:0006793,GO:0006796,GO:0006807,GO:0008150,GO:0008152,GO:0009058,GO:0009116,GO:0009117,GO:0009119,GO:0009123,GO:0009124,GO:0009126,GO:0009127,GO:0009150,GO:0009152,GO:0009156,GO:0009161,GO:0009163,GO:0009165,GO:0009167,GO:0009168,GO:0009259,GO:0009260,GO:0009987,GO:0016874,GO:0016879,GO:…	ko:K01951
EXM09116.1	Transaldolase is important for the balance of metabolites in the pentose-phosphate pathway		0	NO_SP	0	0	FALSE	FALSE	noTP	Cytoplasm	cyto	Cytoplasmic			Cytoplasmic effector	0	effector_(plant_avirulence_determinant)		H	GO:0001300,GO:0003674,GO:0003824,GO:0004801,GO:0005575,GO:0005622,GO:0005623,GO:0005634,GO:0005654,GO:0005737,GO:0005829,GO:0005975,GO:0005996,GO:0005997,GO:0005999,GO:0006081,GO:0006098,GO:0006139,GO:0006725,GO:0006732,GO:0006733,GO:0006739,GO:0006753,GO:0006793,GO:0006796,GO:0006807,GO:0006950,GO:0006979,GO:0007154,GO:0007165,GO:0007166,GO:0007568,GO:0007569,GO:0008150,GO:0008152,GO:0009052,GO:…	ko:K00616
EXM09133.1	Fumarate hydratase, mitochondrial precursor		0	NO_SP	0	0	FALSE	FALSE	mTP	Mitochondrion	mito	Membrane bound Mitochondrial			Non-effector	0	reduced_virulence		C	GO:0003674,GO:0003824,GO:0004333,GO:0005575,GO:0005622,GO:0005623,GO:0005737,GO:0005739,GO:0005759,GO:0005829,GO:0006082,GO:0006091,GO:0006099,GO:0006101,GO:0006106,GO:0006108,GO:0008150,GO:0008152,GO:0009060,GO:0009987,GO:0015980,GO:0016829,GO:0016835,GO:0016836,GO:0016999,GO:0017144,GO:0019752,GO:0031974,GO:0043226,GO:0043227,GO:0043229,GO:0043231,GO:0043233,GO:0043436,GO:0043648,GO:0044237,GO:…	ko:K01679
EXM09196.1	-		0	NO_SP	0	0	FALSE	FALSE	noTP	Cytoplasm	cyto_nucl	Nuclear			Cytoplasmic effector	0			-	-	-
EXM09240.1	Ketopantoate reductase PanE/ApbA		0	NO_SP	0	0	FALSE	FALSE	noTP	Cytoplasm	cyto_nucl	Nuclear			Non-effector	0			H	GO:0005575,GO:0005622,GO:0005623,GO:0005737,GO:0005933,GO:0005934,GO:0005935,GO:0006810,GO:0006897,GO:0007124,GO:0008150,GO:0009987,GO:0016049,GO:0016192,GO:0030427,GO:0030447,GO:0040007,GO:0044182,GO:0044424,GO:0044464,GO:0051179,GO:0051234,GO:0070783,GO:0071944,GO:0098657	-
EXM09264.1	to chitin biosynthesis protein	Y	0	NO_SP	0	0	FALSE	FALSE	noTP	Cytoplasm	cyto	Nuclear			Non-effector	0			L	GO:0000003,GO:0000746,GO:0000747,GO:0005575,GO:0005622,GO:0005623,GO:0005737,GO:0005768,GO:0005769,GO:0005794,GO:0005798,GO:0005802,GO:0006139,GO:0006259,GO:0006260,GO:0006261,GO:0006270,GO:0006725,GO:0006807,GO:0006810,GO:0006892,GO:0006893,GO:0006895,GO:0006896,GO:0007034,GO:0008150,GO:0008152,GO:0009058,GO:0009059,GO:0009987,GO:0012505,GO:0016192,GO:0016482,GO:0019953,GO:0022414,GO:0030133,GO:…	ko:K19877
EXM09274.1	to Hsp70 chaperone BiP		0	NO_SP	0	0	FALSE	FALSE	noTP	Cytoplasm	cyto	Cytoplasmic			Non-effector	0	loss_of_pathogenicity		O	GO:0002181,GO:0003674,GO:0005488,GO:0005515,GO:0005575,GO:0005622,GO:0005623,GO:0005737,GO:0005844,GO:0006139,GO:0006364,GO:0006396,GO:0006412,GO:0006414,GO:0006450,GO:0006452,GO:0006457,GO:0006458,GO:0006518,GO:0006725,GO:0006807,GO:0008150,GO:0008152,GO:0009058,GO:0009059,GO:0009987,GO:0010467,GO:0016070,GO:0016072,GO:0019538,GO:0022613,GO:0032991,GO:0034470,GO:0034641,GO:0034645,GO:0034660,GO:…	-
EXM09314.1	Belongs to the cytochrome b5 family		0	NO_SP	1	1	FALSE	FALSE	noTP	Mitochondrion	cyto	Membrane bound Vacuolar			Cytoplasmic effector	0	reduced_virulence		C	GO:0003674,GO:0003824,GO:0005575,GO:0005622,GO:0005623,GO:0005737,GO:0005783,GO:0005789,GO:0006066,GO:0006091,GO:0006629,GO:0006694,GO:0006696,GO:0008150,GO:0008152,GO:0008202,GO:0008204,GO:0008610,GO:0009055,GO:0009058,GO:0009987,GO:0012505,GO:0016020,GO:0016125,GO:0016126,GO:0016128,GO:0016129,GO:0016491,GO:0022900,GO:0031984,GO:0042175,GO:0043226,GO:0043227,GO:0043229,GO:0043231,GO:0044107,GO:…	-
EXM09354.1	FAD binding domain		0	NO_SP	0	0	FALSE	FALSE	noTP	Peroxisome	cyto	Cytoplasmic			Non-effector	0	reduced_virulence		C	-	-
EXM09363.1	Belongs to the glycosyl hydrolase 32 family		0	SP	0	0	FALSE	FALSE	SP	Extracellular	extr	Mitochondrial	Classical_secreted	GH32	Non-effector	0	reduced_virulence		G	-	ko:K01193
EXM09374.1	Binds the poly(A) tail of mRNA		0	NO_SP	0	0	FALSE	FALSE	noTP	Cytoplasm	cyto	Cytoplasmic			Non-effector	0	lethal		AJ	GO:0003674,GO:0003676,GO:0003682,GO:0003723,GO:0003727,GO:0003729,GO:0004857,GO:0005488,GO:0005575,GO:0005622,GO:0005623,GO:0005634,GO:0005681,GO:0005737,GO:0005840,GO:0006403,GO:0006405,GO:0006406,GO:0006417,GO:0006446,GO:0006611,GO:0006810,GO:0006886,GO:0006913,GO:0008104,GO:0008143,GO:0008150,GO:0008152,GO:0008428,GO:0009889,GO:0009894,GO:0010467,GO:0010468,GO:0010494,GO:0010556,GO:0010608,GO:…	ko:K13126
EXM09400.1	-	Y	0	NO_SP	1	1	FALSE	FALSE	noTP	Cell_membrane	plas	Plasma membrane	Classical_membrane		Cytoplasmic effector	0			-	-	-
EXM09403.1	Aminotransferase class I and II		0	NO_SP	0	0	FALSE	FALSE	mTP	Mitochondrion	mito	Membrane bound Mitochondrial			Non-effector	0	reduced_virulence		E	GO:0001300,GO:0001505,GO:0003674,GO:0003824,GO:0004021,GO:0005575,GO:0005622,GO:0005623,GO:0005634,GO:0005737,GO:0005739,GO:0006082,GO:0006520,GO:0006522,GO:0006523,GO:0006524,GO:0006536,GO:0006537,GO:0006807,GO:0007568,GO:0007569,GO:0008150,GO:0008152,GO:0008483,GO:0008652,GO:0009056,GO:0009058,GO:0009063,GO:0009064,GO:0009078,GO:0009079,GO:0009080,GO:0009084,GO:0009987,GO:0016053,GO:0016054,GO:…	ko:K00814
EXM09437.1	Catalyzes the reversible phosphorylation of S-methyl-5'- thioadenosine (MTA) to adenine and 5-methylthioribose-1-phosphate. Involved in the breakdown of MTA, a major by-product of polyamine biosynthesis. Responsible for the first step in the methionine salvage pathway after MTA has been generated from S- adenosylmethionine. Has broad substrate specificity with 6- aminopurine nucleosides as prefer…		0	NO_SP	0	0	FALSE	FALSE	noTP	Cytoplasm	cyto	Cytoplasmic			Non-effector	0			F	GO:0000096,GO:0000097,GO:0003674,GO:0003676,GO:0003723,GO:0003729,GO:0003824,GO:0004731,GO:0005488,GO:0005575,GO:0005576,GO:0005622,GO:0005623,GO:0005737,GO:0006082,GO:0006520,GO:0006536,GO:0006537,GO:0006555,GO:0006790,GO:0006807,GO:0008150,GO:0008152,GO:0008652,GO:0009058,GO:0009064,GO:0009066,GO:0009067,GO:0009084,GO:0009086,GO:0009987,GO:0016053,GO:0016740,GO:0016757,GO:0016763,GO:0017061,GO:…	ko:K00772
EXM09461.1	to assimilatory sulfite reductase		0	NO_SP	0	0	FALSE	FALSE	noTP	Cytoplasm	cyto_nucl	Membrane bound Vacuolar			Non-effector	0	reduced_virulence		C	GO:0000103,GO:0003674,GO:0003824,GO:0003958,GO:0004783,GO:0005575,GO:0005622,GO:0005623,GO:0006790,GO:0008150,GO:0008152,GO:0009337,GO:0009987,GO:0016491,GO:0016651,GO:0016653,GO:0016667,GO:0016668,GO:0032991,GO:0044237,GO:0044424,GO:0044464,GO:0055114	ko:K00380
EXM09480.1	Phenazine biosynthesis-like protein	Y	0	NO_SP	0	0	FALSE	FALSE	noTP	Cytoplasm	cyto	Cytoplasmic			Non-effector	0	reduced_virulence		S	-	-
EXM09486.1	60S ribosomal protein L8		0	NO_SP	0	0	FALSE	FALSE	noTP	Cytoplasm	mito	Nuclear			Cytoplasmic effector	0			J	GO:0000470,GO:0002181,GO:0003674,GO:0003676,GO:0003723,GO:0003735,GO:0005198,GO:0005488,GO:0005575,GO:0005622,GO:0005623,GO:0005737,GO:0005829,GO:0005840,GO:0006139,GO:0006364,GO:0006396,GO:0006412,GO:0006518,GO:0006725,GO:0006807,GO:0008150,GO:0008152,GO:0009058,GO:0009059,GO:0009987,GO:0010467,GO:0015934,GO:0016070,GO:0016072,GO:0019538,GO:0022613,GO:0022625,GO:0022626,GO:0032991,GO:0034470,GO:…	ko:K02936
EXM09501.1	to EH domain binding protein epsin 2		0	NO_SP	0	0	FALSE	FALSE	noTP	Nucleus	nucl	Nuclear			Cytoplasmic effector	0			F	GO:0000147,GO:0003674,GO:0005488,GO:0005515,GO:0005543,GO:0005546,GO:0005575,GO:0005622,GO:0005623,GO:0005737,GO:0005768,GO:0005769,GO:0005856,GO:0005933,GO:0005934,GO:0005935,GO:0005937,GO:0005938,GO:0006810,GO:0006897,GO:0006996,GO:0007010,GO:0007015,GO:0008150,GO:0008289,GO:0009987,GO:0012505,GO:0015629,GO:0016043,GO:0016192,GO:0022607,GO:0030029,GO:0030036,GO:0030276,GO:0030427,GO:0030479,GO:…	ko:K12471
EXM09611.1	Glycosyl hydrolase family 76		0	SP	3	3	FALSE	FALSE	SP	Cell_membrane	extr	Plasma membrane	Classical_membrane	GH76	Non-effector	0			G	-	ko:K08257
EXM09647.1	CFEM domain		0	SP	0	0	FALSE	TRUE	SP	Cell_membrane	extr	Membrane bound Extracellular (Secreted)	Classical_membrane		Non-effector	0	unaffected_pathogenicity		S	-	-
EXM09652.1	2-methylcitrate dehydratase activity		0	NO_SP	1	1	FALSE	FALSE	SP	Extracellular	extr	Membrane bound Extracellular (Secreted)	Classical_membrane		Apoplastic effector	0			S	-	-
EXM09744.1	Phosphoglycerate mutase family	Y	0	NO_SP	0	2	FALSE	FALSE	noTP	Mitochondrion	cyto	Membrane bound Endoplasmic reticulum			Non-effector	0			G	-	-
EXM09829.1	Histone H2A		0	NO_SP	0	0	FALSE	FALSE	noTP	Nucleus	nucl	Nuclear			Cytoplasmic effector	0	unaffected_pathogenicity		B	GO:0000228,GO:0000785,GO:0000786,GO:0000788,GO:0000790,GO:0000812,GO:0000956,GO:0001672,GO:0003674,GO:0003676,GO:0003677,GO:0003682,GO:0005488,GO:0005575,GO:0005622,GO:0005623,GO:0005634,GO:0005694,GO:0006139,GO:0006325,GO:0006338,GO:0006342,GO:0006355,GO:0006357,GO:0006401,GO:0006402,GO:0006725,GO:0006807,GO:0006996,GO:0008150,GO:0008152,GO:0009056,GO:0009057,GO:0009889,GO:0009890,GO:0009892,GO:…	ko:K11251
EXM09854.1	-	Y	0	NO_SP	0	0	FALSE	FALSE	noTP	Cytoplasm	nucl	Cytoplasmic			Non-effector	0			-	-	-
EXM09869.1	to aminopeptidase B		0	NO_SP	0	0	FALSE	FALSE	mTP	Mitochondrion	mito	Membrane bound Mitochondrial			Non-effector	0	increased_virulence_(hypervirulence)		EO	-	-
EXM09876.1	biological adhesion	Y	0	SP	0	0	FALSE	FALSE	SP	Nucleus	nucl	Extracellular (Secreted)	Classical_secreted		Non-effector	0			S	-	-
EXM09924.1	Ubiquitin elongating factor core	Y	0	NO_SP	0	0	FALSE	FALSE	noTP	Cytoplasm	nucl	Cytoplasmic			Non-effector	0			O	GO:0000209,GO:0003674,GO:0003824,GO:0004842,GO:0005575,GO:0005622,GO:0005623,GO:0005634,GO:0005737,GO:0006464,GO:0006508,GO:0006511,GO:0006807,GO:0006950,GO:0008150,GO:0008152,GO:0009056,GO:0009057,GO:0009636,GO:0009893,GO:0009987,GO:0010033,GO:0010243,GO:0010498,GO:0010604,GO:0016567,GO:0016740,GO:0019222,GO:0019538,GO:0019787,GO:0019941,GO:0030163,GO:0030433,GO:0031323,GO:0031325,GO:0031396,GO:…	ko:K10597
EXM09925.1	Catalyzes the hydrolytic deamination of adenine to hypoxanthine. Plays an important role in the purine salvage pathway and in nitrogen catabolism		0	NO_SP	0	0	FALSE	FALSE	noTP	Cytoplasm	mito	Cytoplasmic			Non-effector	0			F	GO:0000034,GO:0003674,GO:0003824,GO:0005575,GO:0005622,GO:0005623,GO:0005634,GO:0005737,GO:0006139,GO:0006144,GO:0006145,GO:0006146,GO:0006725,GO:0006807,GO:0007155,GO:0008150,GO:0008152,GO:0009056,GO:0009058,GO:0009112,GO:0009113,GO:0009987,GO:0016787,GO:0016810,GO:0016814,GO:0018130,GO:0019239,GO:0019438,GO:0019439,GO:0022610,GO:0031589,GO:0034641,GO:0034654,GO:0036164,GO:0042440,GO:0043094,GO:…	ko:K01488
EXM10043.1	Catalyzes the interconversion between the alpha and beta anomers from at least three hexose 6-phosphate sugars (Glc6P, Gal6P, and Man6P)		0	NO_SP	0	0	FALSE	FALSE	noTP	Cytoplasm	cyto	Membrane bound Mitochondrial			Non-effector	0			G	GO:0003674,GO:0003824,GO:0005575,GO:0005622,GO:0005623,GO:0005634,GO:0005737,GO:0005975,GO:0008150,GO:0008152,GO:0009987,GO:0016853,GO:0016854,GO:0016857,GO:0043226,GO:0043227,GO:0043229,GO:0043231,GO:0044237,GO:0044238,GO:0044262,GO:0044424,GO:0044464,GO:0047938,GO:0071704	ko:K01792
EXM10077.1	to thiosulfate	Y	0	NO_SP	0	0	FALSE	FALSE	mTP	Mitochondrion	mito	Membrane bound Mitochondrial			Non-effector	0	reduced_virulence		V	GO:0002097,GO:0002098,GO:0002143,GO:0003674,GO:0003824,GO:0004792,GO:0005575,GO:0005622,GO:0005623,GO:0005737,GO:0005739,GO:0006139,GO:0006396,GO:0006399,GO:0006400,GO:0006725,GO:0006807,GO:0008033,GO:0008150,GO:0008152,GO:0009451,GO:0009987,GO:0010467,GO:0016070,GO:0016740,GO:0016782,GO:0016783,GO:0034227,GO:0034470,GO:0034641,GO:0034660,GO:0043170,GO:0043226,GO:0043227,GO:0043229,GO:0043231,GO:…	ko:K01011
EXM10078.1	Belongs to the universal ribosomal protein uS5 family		0	NO_SP	0	0	FALSE	FALSE	noTP	Nucleus	cyto	Membrane bound Mitochondrial			Cytoplasmic effector	0			J	GO:0002181,GO:0003674,GO:0003676,GO:0003723,GO:0003735,GO:0005198,GO:0005488,GO:0005575,GO:0005622,GO:0005623,GO:0005737,GO:0005829,GO:0005840,GO:0006403,GO:0006405,GO:0006407,GO:0006412,GO:0006417,GO:0006450,GO:0006518,GO:0006611,GO:0006807,GO:0006810,GO:0006886,GO:0006913,GO:0008104,GO:0008150,GO:0008152,GO:0009058,GO:0009059,GO:0009889,GO:0009891,GO:0009893,GO:0009987,GO:0010467,GO:0010468,GO:…	ko:K02981
EXM10104.1	Eukaryotic protein of unknown function (DUF866)		0	NO_SP	0	0	FALSE	FALSE	noTP	Cytoplasm	cyto	Cytoplasmic			Cytoplasmic effector	0			S	GO:0005575,GO:0005622,GO:0005623,GO:0005634,GO:0005737,GO:0043226,GO:0043227,GO:0043229,GO:0043231,GO:0044424,GO:0044464	-
EXM10173.1	glutamate synthase		0	NO_SP	0	0	FALSE	FALSE	noTP	Cytoplasm	cyto	Nuclear			Non-effector	0			E	GO:0001505,GO:0003674,GO:0003824,GO:0005575,GO:0005622,GO:0005623,GO:0005737,GO:0005739,GO:0006082,GO:0006520,GO:0006536,GO:0006537,GO:0006541,GO:0006807,GO:0008150,GO:0008152,GO:0008652,GO:0009058,GO:0009064,GO:0009084,GO:0009987,GO:0015930,GO:0016040,GO:0016053,GO:0016491,GO:0016638,GO:0016639,GO:0017144,GO:0019676,GO:0019740,GO:0019752,GO:0030447,GO:0036267,GO:0040007,GO:0042133,GO:0043226,GO:…	ko:K00264
EXM10178.1	to ribitol kinase		0	NO_SP	0	0	FALSE	FALSE	noTP	Peroxisome	cyto	Cytoplasmic			Non-effector	0			G	GO:0003674,GO:0003824,GO:0005975,GO:0005996,GO:0006793,GO:0006796,GO:0008150,GO:0008152,GO:0009987,GO:0016301,GO:0016310,GO:0016740,GO:0016772,GO:0016773,GO:0019150,GO:0019200,GO:0019321,GO:0044237,GO:0044238,GO:0044262,GO:0044281,GO:0046835,GO:0071704	-
EXM10190.1	citrate synthase		0	NO_SP	0	0	FALSE	FALSE	mTP	Mitochondrion	mito	Membrane bound Mitochondrial			Non-effector	0			H	GO:0003674,GO:0003824,GO:0004108,GO:0005575,GO:0005622,GO:0005623,GO:0005737,GO:0005739,GO:0005759,GO:0005777,GO:0005975,GO:0006081,GO:0006082,GO:0006084,GO:0006091,GO:0006097,GO:0006099,GO:0006101,GO:0006139,GO:0006163,GO:0006195,GO:0006520,GO:0006536,GO:0006537,GO:0006637,GO:0006725,GO:0006732,GO:0006753,GO:0006790,GO:0006793,GO:0006796,GO:0006807,GO:0008150,GO:0008152,GO:0008652,GO:0009056,GO:…	ko:K01647
EXM10201.1	DegT/DnrJ/EryC1/StrS aminotransferase family		0	NO_SP	0	0	FALSE	FALSE	noTP	Peroxisome	cyto	Cytoplasmic			Non-effector	0	unaffected_pathogenicity		E	GO:0000096,GO:0000097,GO:0003674,GO:0003824,GO:0003961,GO:0004124,GO:0005575,GO:0005622,GO:0005623,GO:0005737,GO:0005886,GO:0006082,GO:0006520,GO:0006534,GO:0006535,GO:0006555,GO:0006563,GO:0006790,GO:0006807,GO:0008150,GO:0008152,GO:0008652,GO:0009058,GO:0009066,GO:0009067,GO:0009069,GO:0009070,GO:0009086,GO:0009987,GO:0016020,GO:0016053,GO:0016740,GO:0016765,GO:0017144,GO:0019344,GO:0019752,GO:…	ko:K17069
EXM10227.1	Minor allergen Alt a 7		0	NO_SP	0	0	FALSE	FALSE	noTP	Cytoplasm	cyto	Membrane bound Mitochondrial		AA6	Non-effector	0	reduced_virulence		S	GO:0000166,GO:0000785,GO:0000792,GO:0003674,GO:0003824,GO:0003955,GO:0005488,GO:0005575,GO:0005622,GO:0005623,GO:0005694,GO:0005737,GO:0005739,GO:0005886,GO:0006091,GO:0006325,GO:0006342,GO:0006355,GO:0006996,GO:0008150,GO:0008152,GO:0009055,GO:0009889,GO:0009890,GO:0009892,GO:0009987,GO:0010181,GO:0010468,GO:0010556,GO:0010558,GO:0010605,GO:0010629,GO:0016020,GO:0016043,GO:0016458,GO:0016491,GO:…	ko:K03809
EXM10247.1	to ABC transporter	Y	0	SP	7	9	FALSE	TRUE	SP	Cell_membrane	plas	Plasma membrane	Classical_membrane		Non-effector	0	reduced_virulence		Q	GO:0000322,GO:0000323,GO:0000324,GO:0000329,GO:0003674,GO:0003824,GO:0005215,GO:0005575,GO:0005622,GO:0005623,GO:0005737,GO:0005773,GO:0005774,GO:0005783,GO:0005886,GO:0006810,GO:0008150,GO:0012505,GO:0015399,GO:0015405,GO:0016020,GO:0016021,GO:0016462,GO:0016787,GO:0016817,GO:0016818,GO:0016887,GO:0017111,GO:0022804,GO:0022857,GO:0031090,GO:0031224,GO:0042623,GO:0042626,GO:0043226,GO:0043227,GO:…	ko:K05681
EXM10270.1	Actin cytoskeleton-regulatory complex protein		0	NO_SP	0	0	FALSE	FALSE	noTP	Nucleus	cysk	Nuclear			Non-effector	0			T	GO:0000147,GO:0003674,GO:0005488,GO:0005515,GO:0005575,GO:0005622,GO:0005623,GO:0005634,GO:0005635,GO:0005643,GO:0005737,GO:0005856,GO:0005933,GO:0005935,GO:0005937,GO:0005938,GO:0006810,GO:0006897,GO:0006898,GO:0006996,GO:0007010,GO:0007015,GO:0008064,GO:0008150,GO:0009987,GO:0010639,GO:0012505,GO:0015629,GO:0016043,GO:0016192,GO:0022607,GO:0030029,GO:0030036,GO:0030427,GO:0030447,GO:0030448,GO:…	ko:K20046
EXM10293.1	ATP phosphoribosyltransferase		0	NO_SP	0	0	FALSE	FALSE	noTP	Cytoplasm	cyto	Cytoplasmic			Non-effector	0	reduced_virulence		E	GO:0000105,GO:0003674,GO:0003824,GO:0003879,GO:0006082,GO:0006520,GO:0006547,GO:0006725,GO:0006807,GO:0008150,GO:0008152,GO:0008652,GO:0009058,GO:0009987,GO:0016053,GO:0016740,GO:0016757,GO:0016763,GO:0018130,GO:0019438,GO:0019752,GO:0034641,GO:0043436,GO:0044237,GO:0044238,GO:0044249,GO:0044281,GO:0044283,GO:0046394,GO:0046483,GO:0052803,GO:0071704,GO:1901360,GO:1901362,GO:1901564,GO:1901566,GO:…	ko:K00765
EXM10326.1	Enolase, N-terminal domain		0	NO_SP	0	0	FALSE	FALSE	noTP	Cytoplasm	cyto	Cytoplasmic			Non-effector	0			G	GO:0000015,GO:0000322,GO:0000323,GO:0000324,GO:0003674,GO:0003810,GO:0003824,GO:0004634,GO:0005488,GO:0005515,GO:0005575,GO:0005576,GO:0005618,GO:0005622,GO:0005623,GO:0005634,GO:0005737,GO:0005739,GO:0005773,GO:0005829,GO:0005886,GO:0005975,GO:0005996,GO:0006006,GO:0006007,GO:0006082,GO:0006090,GO:0006091,GO:0006094,GO:0006096,GO:0006139,GO:0006163,GO:0006164,GO:0006165,GO:0006725,GO:0006732,GO:…	ko:K01689
EXM10405.1	to actin binding protein		0	NO_SP	0	0	FALSE	FALSE	noTP	Cytoplasm	extr	Plasma membrane	Non-classical_secreted		Non-effector	0	reduced_virulence		Z	GO:0000147,GO:0003674,GO:0003779,GO:0005488,GO:0005515,GO:0005575,GO:0005622,GO:0005623,GO:0005737,GO:0005856,GO:0005937,GO:0005938,GO:0006996,GO:0007010,GO:0008064,GO:0008092,GO:0008104,GO:0008150,GO:0009987,GO:0010638,GO:0010639,GO:0015629,GO:0016043,GO:0022607,GO:0030029,GO:0030036,GO:0030427,GO:0030479,GO:0030832,GO:0030833,GO:0030834,GO:0030835,GO:0030837,GO:0030838,GO:0030863,GO:0030864,GO:…	ko:K20520
EXM10408.1	mRNA cap-binding component of the eukaryotic translation initiation factor 3 (eIF-3) complex, which is involved in protein synthesis of a specialized repertoire of mRNAs and, together with other initiation factors, stimulates binding of mRNA and methionyl-tRNAi to the 40S ribosome. The eIF-3 complex specifically targets and initiates translation of a subset of mRNAs involved in cell proliferation…		0	NO_SP	0	0	FALSE	FALSE	noTP	Nucleus	cyto	Cytoplasmic			Non-effector	0			J	GO:0001732,GO:0002181,GO:0002183,GO:0003674,GO:0003676,GO:0003723,GO:0003743,GO:0005488,GO:0005575,GO:0005622,GO:0005623,GO:0005737,GO:0005829,GO:0005852,GO:0006412,GO:0006413,GO:0006518,GO:0006807,GO:0008135,GO:0008150,GO:0008152,GO:0009058,GO:0009059,GO:0009987,GO:0010467,GO:0016043,GO:0016282,GO:0019538,GO:0022607,GO:0022613,GO:0022618,GO:0032879,GO:0032880,GO:0032991,GO:0034622,GO:0034641,GO:…	ko:K03251
EXM10426.1	Choline/ethanolamine kinase		0	NO_SP	0	0	FALSE	FALSE	noTP	Cytoplasm	nucl	Cytoplasmic			Non-effector	0			I	-	ko:K00894
EXM10457.1	acetate kinase		0	NO_SP	0	0	FALSE	FALSE	noTP	Plastid	cyto_mito	Membrane bound Mitochondrial			Non-effector	0	unaffected_pathogenicity		F	-	ko:K00925
EXM10504.1	Catalyzes the rate-limiting step of the oxidative pentose-phosphate pathway, which represents a route for the dissimilation of carbohydrates besides glycolysis	Y	0	NO_SP	0	0	FALSE	FALSE	noTP	Cytoplasm	cyto	Cytoplasmic			Non-effector	0			G	GO:0000166,GO:0000302,GO:0002262,GO:0002376,GO:0002520,GO:0003674,GO:0003824,GO:0004345,GO:0005488,GO:0005515,GO:0005536,GO:0005575,GO:0005622,GO:0005623,GO:0005737,GO:0005829,GO:0005886,GO:0005975,GO:0005996,GO:0006066,GO:0006081,GO:0006091,GO:0006098,GO:0006139,GO:0006518,GO:0006575,GO:0006629,GO:0006694,GO:0006695,GO:0006725,GO:0006732,GO:0006733,GO:0006739,GO:0006740,GO:0006749,GO:0006753,GO:…	ko:K00036
EXM10524.1	Shwachman-Bodian-Diamond syndrome (SBDS) protein		0	NO_SP	0	0	FALSE	FALSE	noTP	Cytoplasm	cyto_nucl	Cytoplasmic			Cytoplasmic effector	0			S	GO:0003674,GO:0003676,GO:0003723,GO:0005488,GO:0005575,GO:0005622,GO:0005623,GO:0005634,GO:0005737,GO:0006139,GO:0006364,GO:0006396,GO:0006725,GO:0006807,GO:0008150,GO:0008152,GO:0009987,GO:0010467,GO:0016070,GO:0016072,GO:0022613,GO:0034470,GO:0034641,GO:0034660,GO:0042254,GO:0043170,GO:0043226,GO:0043227,GO:0043229,GO:0043231,GO:0044085,GO:0044237,GO:0044238,GO:0044424,GO:0044464,GO:0046483,GO:…	-
EXM10530.1	Ribosomal protein S28e		0	NO_SP	0	0	FALSE	FALSE	noTP	Mitochondrion	mito	Nuclear			Cytoplasmic effector	0			J	GO:0000028,GO:0002181,GO:0003674,GO:0003676,GO:0003723,GO:0003735,GO:0005198,GO:0005488,GO:0005575,GO:0005622,GO:0005623,GO:0005737,GO:0005829,GO:0005840,GO:0006139,GO:0006364,GO:0006396,GO:0006403,GO:0006405,GO:0006407,GO:0006412,GO:0006518,GO:0006611,GO:0006725,GO:0006807,GO:0006810,GO:0006886,GO:0006913,GO:0006996,GO:0008104,GO:0008150,GO:0008152,GO:0009058,GO:0009059,GO:0009893,GO:0009894,GO:…	ko:K02979
EXM10551.1	glycoside hydrolase family 17 protein		0	SP	0	0	FALSE	FALSE	SP	Extracellular	cyto	Membrane bound Extracellular (Secreted)	Classical_secreted	GH17	Non-effector	0	reduced_virulence		G	GO:0005575,GO:0005618,GO:0005623,GO:0009277,GO:0030312,GO:0044464,GO:0071944	-
EXM10554.1	Threonyl and Alanyl tRNA synthetase second additional domain		0	NO_SP	0	0	FALSE	FALSE	noTP	Peroxisome	mito	Membrane bound Mitochondrial			Non-effector	0			J	GO:0002181,GO:0003674,GO:0003824,GO:0004812,GO:0004829,GO:0005575,GO:0005622,GO:0005623,GO:0005737,GO:0005739,GO:0006082,GO:0006139,GO:0006399,GO:0006412,GO:0006418,GO:0006435,GO:0006518,GO:0006520,GO:0006725,GO:0006807,GO:0008150,GO:0008152,GO:0009058,GO:0009059,GO:0009987,GO:0010467,GO:0016070,GO:0016874,GO:0016875,GO:0019538,GO:0019752,GO:0034641,GO:0034645,GO:0034660,GO:0043038,GO:0043039,GO:…	ko:K01868
EXM10557.1	protein disulfide-isomerase precursor		1	SP	0	0	FALSE	FALSE	SP	Endoplasmic_reticulum	cyto	Membrane bound Endoplasmic reticulum			Non-effector	0	reduced_virulence__unaffected_pathogenicity		O	GO:0001666,GO:0003674,GO:0003756,GO:0003824,GO:0004656,GO:0005102,GO:0005178,GO:0005488,GO:0005515,GO:0005575,GO:0005576,GO:0005622,GO:0005623,GO:0005737,GO:0005783,GO:0005788,GO:0005793,GO:0005886,GO:0006082,GO:0006457,GO:0006464,GO:0006508,GO:0006511,GO:0006516,GO:0006517,GO:0006520,GO:0006575,GO:0006807,GO:0006950,GO:0007154,GO:0007165,GO:0007166,GO:0008150,GO:0008152,GO:0009056,GO:0009057,GO:…	ko:K09580
EXM10567.1	Belongs to the 14-3-3 family		0	NO_SP	0	0	FALSE	FALSE	noTP	Cytoplasm	cyto_nucl	Cytoplasmic			Cytoplasmic effector	0	reduced_virulence		O	-	ko:K06630
EXM10605.1	protein subunit beta		0	NO_SP	0	0	FALSE	FALSE	noTP	Cytoplasm	nucl	Cytoplasmic			Non-effector	0	reduced_virulence		Z	GO:0000278,GO:0000281,GO:0000902,GO:0000910,GO:0000912,GO:0000915,GO:0000916,GO:0003674,GO:0003779,GO:0005488,GO:0005515,GO:0005575,GO:0005622,GO:0005623,GO:0005634,GO:0005737,GO:0005856,GO:0005884,GO:0005886,GO:0005933,GO:0005934,GO:0005937,GO:0005938,GO:0006996,GO:0007010,GO:0007049,GO:0008064,GO:0008092,GO:0008150,GO:0008290,GO:0009653,GO:0009987,GO:0010638,GO:0010639,GO:0015629,GO:0016020,GO:…	ko:K10365
EXM10620.1	Carbamoyl-phosphate synthase arginine-specific large chain		0	NO_SP	0	0	FALSE	FALSE	mTP	Plastid	mito	Membrane bound Mitochondrial			Non-effector	0			EF	GO:0000050,GO:0000166,GO:0003674,GO:0003824,GO:0004087,GO:0004088,GO:0005488,GO:0005524,GO:0005575,GO:0005622,GO:0005623,GO:0005737,GO:0005951,GO:0006082,GO:0006139,GO:0006206,GO:0006207,GO:0006520,GO:0006525,GO:0006526,GO:0006725,GO:0006807,GO:0008144,GO:0008150,GO:0008152,GO:0008652,GO:0009058,GO:0009064,GO:0009084,GO:0009112,GO:0009987,GO:0016053,GO:0016874,GO:0016879,GO:0016884,GO:0017076,GO:…	ko:K01955
EXM10626.1	PWWP domain		0	NO_SP	0	0	FALSE	FALSE	noTP	Nucleus	nucl	Cytoplasmic			Cytoplasmic effector	0			S	-	-
EXM10707.1	-	Y	0	NO_SP	0	0	FALSE	FALSE	noTP	Mitochondrion	nucl	Cytoplasmic			Non-effector	0			-	-	-
EXM10744.1	Catalyzes the formation of 6,7-dimethyl-8- ribityllumazine by condensation of 5-amino-6-(D- ribitylamino)uracil with 3,4-dihydroxy-2-butanone 4-phosphate. This is the penultimate step in the biosynthesis of riboflavin		0	NO_SP	0	0	FALSE	FALSE	noTP	Cytoplasm	cyto	Cytoplasmic			Cytoplasmic effector	0			H	GO:0000906,GO:0003674,GO:0003824,GO:0005488,GO:0005575,GO:0005622,GO:0005623,GO:0005634,GO:0005737,GO:0005739,GO:0005740,GO:0005758,GO:0006766,GO:0006767,GO:0006771,GO:0006807,GO:0008144,GO:0008150,GO:0008152,GO:0009058,GO:0009110,GO:0009231,GO:0009987,GO:0016740,GO:0016765,GO:0017144,GO:0018130,GO:0019842,GO:0031967,GO:0031970,GO:0031974,GO:0031975,GO:0034641,GO:0036094,GO:0042364,GO:0042726,GO:…	ko:K00794
EXM10774.1	Ribosomal protein L6		0	NO_SP	0	0	FALSE	FALSE	noTP	Cytoplasm	cyto_nucl	Cytoplasmic			Cytoplasmic/apoplastic effector	0			J	GO:0002181,GO:0003674,GO:0003676,GO:0003723,GO:0003735,GO:0005198,GO:0005488,GO:0005575,GO:0005622,GO:0005623,GO:0005737,GO:0005829,GO:0005840,GO:0006412,GO:0006518,GO:0006807,GO:0008150,GO:0008152,GO:0009058,GO:0009059,GO:0009987,GO:0010467,GO:0015934,GO:0019538,GO:0022625,GO:0022626,GO:0032991,GO:0034641,GO:0034645,GO:0043043,GO:0043170,GO:0043226,GO:0043228,GO:0043229,GO:0043232,GO:0043603,GO:…	ko:K02940
EXM10787.1	Kelch motif	Y	0	NO_SP	1	2	FALSE	FALSE	noTP	Cell_membrane	plas	Plasma membrane	Classical_membrane		Non-effector	0			S	-	-
EXM10805.1	Belongs to the aldehyde dehydrogenase family		0	NO_SP	0	0	FALSE	FALSE	mTP	Mitochondrion	mito	Membrane bound Peroxisomal			Non-effector	0	reduced_virulence		E	GO:0003674,GO:0003824,GO:0003842,GO:0005575,GO:0005622,GO:0005623,GO:0005737,GO:0005739,GO:0005759,GO:0006082,GO:0006520,GO:0006536,GO:0006537,GO:0006560,GO:0006562,GO:0006807,GO:0006950,GO:0007154,GO:0008150,GO:0008152,GO:0008652,GO:0009056,GO:0009058,GO:0009063,GO:0009064,GO:0009065,GO:0009084,GO:0009267,GO:0009605,GO:0009987,GO:0009991,GO:0010133,GO:0016053,GO:0016054,GO:0016491,GO:0016645,GO:…	ko:K00294
EXM10813.1	Belongs to the class I-like SAM-binding methyltransferase superfamily. Protein arginine N- methyltransferase family		0	NO_SP	0	0	FALSE	FALSE	noTP	Cytoplasm	cyto	Cytoplasmic			Cytoplasmic effector	0	reduced_virulence		KOT	GO:0003674,GO:0003824,GO:0005575,GO:0005622,GO:0005623,GO:0005634,GO:0005737,GO:0005829,GO:0006325,GO:0006355,GO:0006357,GO:0006403,GO:0006405,GO:0006406,GO:0006464,GO:0006479,GO:0006611,GO:0006807,GO:0006810,GO:0006886,GO:0006913,GO:0006996,GO:0008104,GO:0008150,GO:0008152,GO:0008168,GO:0008170,GO:0008213,GO:0008276,GO:0008469,GO:0008757,GO:0009889,GO:0009890,GO:0009891,GO:0009892,GO:0009893,GO:…	ko:K11434
EXM10814.1	Catalyzes the conversion of GlcNAc-6-P into GlcNAc-1-P during the synthesis of uridine diphosphate UDP-GlcNAc, which is a biosynthetic precursor of chitin and also supplies the amino sugars for N-linked oligosaccharides of glycoproteins		0	NO_SP	0	0	FALSE	FALSE	noTP	Cytoplasm	cyto	Cytoplasmic			Non-effector	0			G	GO:0000271,GO:0003674,GO:0003824,GO:0004610,GO:0005975,GO:0005976,GO:0006022,GO:0006023,GO:0006030,GO:0006031,GO:0006037,GO:0006038,GO:0006040,GO:0006047,GO:0006048,GO:0006139,GO:0006725,GO:0006793,GO:0006807,GO:0008150,GO:0008152,GO:0009058,GO:0009059,GO:0009225,GO:0009226,GO:0009987,GO:0010383,GO:0016051,GO:0016853,GO:0016866,GO:0016868,GO:0017144,GO:0018130,GO:0019438,GO:0033692,GO:0034637,GO:…	ko:K01836
EXM10833.1	Ubiquitin-2 like Rad60 SUMO-like	Y	0	NO_SP	0	0	FALSE	FALSE	noTP	Nucleus	cyto	Nuclear			Cytoplasmic effector	0			DO	GO:0000151,GO:0003674,GO:0005575,GO:0005622,GO:0005623,GO:0006464,GO:0006807,GO:0008150,GO:0008152,GO:0009987,GO:0019005,GO:0019538,GO:0031386,GO:0031461,GO:0032446,GO:0032991,GO:0036211,GO:0043170,GO:0043412,GO:0044237,GO:0044238,GO:0044260,GO:0044267,GO:0044424,GO:0044464,GO:0045116,GO:0070647,GO:0071704,GO:1901564,GO:1902494,GO:1990234	ko:K12158
EXM10844.1	Catalyzes the oxidative decarboxylation of 6- phosphogluconate to ribulose 5-phosphate and CO(2), with concomitant reduction of NADP to NADPH		0	NO_SP	0	0	FALSE	FALSE	noTP	Cytoplasm	cyto	Membrane bound Mitochondrial			Non-effector	0	reduced_virulence		G	GO:0000166,GO:0003674,GO:0003824,GO:0004616,GO:0005488,GO:0005575,GO:0005622,GO:0005623,GO:0005737,GO:0005739,GO:0005829,GO:0005886,GO:0005975,GO:0006081,GO:0006082,GO:0006090,GO:0006091,GO:0006096,GO:0006098,GO:0006139,GO:0006163,GO:0006164,GO:0006165,GO:0006725,GO:0006732,GO:0006733,GO:0006739,GO:0006753,GO:0006754,GO:0006757,GO:0006793,GO:0006796,GO:0006807,GO:0006950,GO:0006979,GO:0008150,GO:…	ko:K00033
[truncated: 58 more rows]

## Sheet: Foc4
#ID	Description	Foc4_unique	Scan_Prosite	Signalp_6	TMHMM_2.0	Phobius_1.01	Big-PI	PredGPI	TargetP_2.0	DeepLoc_1.0	WoLF-PSort_0.2	ProtComp_9	Localization	dbCAN_2	EffectorP_3.0	SSP	PHI_base	Effector_prediction	COG_category	GOs	KEGG_ko
[truncated: 2,450 more rows]
